# Supplementary material for: Anticancer Activity and Cisplatin Binding Ability of Bis-Quinoline and Bis-Isoquinoline Derived [Pd2L4]4+ Metallosupramolecular Cages
Source: Front Chem. 2018 Nov 22;6:563. doi: 10.3389/fchem.2018.00563 (PMC6262750; doi:10.3389/fchem.2018.00563)
Supplement: Supplementary file 2 [file Data_Sheet_2.ZIP › Isoquinv3.xyz]

182
Coordinates from ORCA-job Isoquinv3
  H   0.62039972214115     -0.35432046800070     -0.23479827890187
  C   0.58129417922582     -0.36833500894513      0.86470197649823
  H   0.69595737982359      1.79006163720273      1.06109876497741
  C   0.62353768499227      0.82120844141587      1.57784820558232
  C   0.43570285836881     -1.66372446793043      2.93907322611547
  C   0.57219911355749      0.79508055896237      3.00408840790198
  C   0.48739353320940     -1.61223289113735      1.54961547652300
  C   0.47603690071937     -0.46335882091590      3.69793474849190
  C   0.61110114904019      1.99332427789115      3.76269169206614
  H   0.45502571693533     -2.54733712530674      0.96998081510296
  H   0.36231857119435     -2.62996731476537      3.45858287324280
  N   0.56290106271621      1.99067966231055      5.10079080051302
  H   0.68216732079706      2.96749641659466      3.25515881692668
  C   0.47416392329656      0.81458613027061      5.79053738023585
  H   0.43781439579811      0.87893586127167      6.88676581910769
  C   0.42668765919423     -0.42658688603752      5.14340434119828
  C   0.33149280866360     -1.62023417706582      5.91070946011326
  C   0.24745672652330     -2.66445207012861      6.55961489343979
  C   0.14960281247151     -3.90729753477976      7.26991631105684
  C   -0.03460674634298     -6.28350241283750      8.66075007045538
  C   0.05285848482473     -5.12491798596652      6.54473320347160
  N   0.15484926106117     -3.85178402538863      8.62284697863230
  C   0.06530175624520     -5.01984364176120      9.30192393299288
  C   -0.04061166269853     -6.32394471019946      7.26134583990935
  H   0.05102278943760     -5.11683479938318      5.44573329010989
  H   -0.11809475534486     -7.28512142315737      6.73176009819952
  H   -0.10538533081139     -7.20361871845333      9.25771579376060
  C   0.07282992747396     -4.95064288880492     10.73506000054340
  C   0.07650774221996     -4.93717729135129     11.96726445958171
  H   0.14928713642651     -2.77263353273798     13.55404534803904
  C   0.11885571964366     -3.73121973119091     14.09005864348255
  C   0.07856712104965     -4.94325925784495     13.38942190865413
  C   0.08339790744157     -4.80742630836921     16.17822711628060
  C   0.03851935135061     -6.18140522662255     14.13669703081797
  N   0.11953979749526     -3.68090244705503     15.45536111664502
  C   0.04200102779177     -6.09045890754726     15.57407804930831
  C   -0.00437966638398     -7.46580394423731     13.53101593426717
  H   0.00746886789128     -7.19328408174666     17.46139992152564
  H   0.08575462273526     -4.71178981392143     17.27486143359600
  C   -0.04190854174823     -8.60925795088533     14.32285593102159
  H   -0.00714723955658     -7.54719074550221     12.43459120690590
  H   -0.07553572064957     -9.59996589528000     13.84453806122811
  C   -0.03775829503837     -8.51865017497297     15.74306652326327
  H   -0.06715039810480     -9.43786105667594     16.34710349613766
  C   0.00369439327985     -7.27858406633574     16.36428734930781
  H   0.82742070319168     11.33661957142073      6.18502784701912
  C   0.79930677073750     10.41718849168157      6.78879819306858
  H   0.75186547445878      9.09211298929487      5.07019144549979
  C   0.75727596747737      9.17731053577021      6.16726442276617
  C   0.77011926162837      9.36359072305721      9.00057461468982
  C   0.72079297432609      7.98892037543354      6.95715874977242
  C   0.80576058902683     10.50731307121922      8.20903793570633
  C   0.72685230514260      8.07935258085919      8.39455616559036
  C   0.67870778719633      6.70608992743634      6.35268400192011
  H   0.83969079386703     11.49788374495348      8.68762602987541
  H   0.77487949377617      9.44463856021881     10.09703369496643
  N   0.64537194282216      5.57928164293535      7.07522656483421
  H   0.67392296032823      6.61086571004313      5.25599436701389
  C   0.64866387873352      5.62899787736148      8.44058562039697
  H   0.62077143732166      4.67006844954317      8.97610432981788
  C   0.68843309636449      6.84092812770076      9.14149219021814
  C   0.69194970863663      6.83458604431921     10.56367312188375
  C   0.69648804727682      6.84803417732653     11.79588422028295
  C   0.70483580281078      6.91738990129161     13.22901845686997
  C   0.71630186299160      7.02307441810785     15.98636027761665
  C   0.80343315667600      8.18120117714269     13.87008824342142
  N   0.61587977150166      5.74944782447621     13.90836760370828
  C   0.62099990691100      5.80526371673564     15.26130002232334
  C   0.80865296751127      8.22201971208370     15.26946567653362
  H   0.87404213578030      9.10145591482797     13.27335423774332
  H   0.88495153044047      9.18344036329577     15.79878290347378
  H   0.71693190590777      7.01493164824350     17.08538336554356
  C   0.52414924045816      4.56248640550886     15.97187516958769
  C   0.44027208522081      3.51840500696685     16.62102344772018
  H   0.32821957061492      1.01983779368975     15.64421888534727
  C   0.29617310256888      1.08377725567763     16.74059131789010
  C   0.34582799247916      2.32461635196001     17.38819038514909
  C   0.16464610318605     -0.09596771374024     18.76819376208007
  C   0.30087674151440      2.36063349369904     18.83382843505346
  N   0.20873416785825     -0.09258953049199     17.42997126946699
  C   0.20693761188580      1.10183329165768     19.52734943070109
  C   0.34435409467518      3.56055679698398     19.59320165030860
  H   0.08806194844324      0.10609805290133     21.47052139765664
  H   0.09454869240401     -1.07039530659457     19.27534088424869
  C   0.29655592893654      3.50844125977919     20.98277150072093
  H   0.41642530574300      4.52701014524958     19.07394228834384
  H   0.33154120826271      4.44321755631983     21.56278057004520
  C   0.20383398521587      2.26426283765363     21.66731802602221
  H   0.16768265892191      2.24970671169766     22.76690610278477
  C   0.15940193503522      1.07504497591593     20.95374596103964
  H   6.69651376932530     -3.78166183347119     19.73205323362694
  C   6.21683340472151     -3.30270623362669     18.86534835307672
  H   4.19751898939602     -3.66515844235676     19.57330752738444
  C   4.83318994098820     -3.24024021470348     18.78188257555273
  C   6.44749088539201     -2.13552324710766     16.72371029270196
  C   4.21817508854922     -2.61687059405633     17.65466580014740
  C   7.02329919432980     -2.74815700311247     17.83229973600573
  C   5.03373330301332     -2.05533694652724     16.60876159414938
  C   2.80645767207568     -2.53559663612241     17.53956966184317
  H   8.11951756868611     -2.80565817441037     17.91243802071935
  H   7.07997478235564     -1.71039292165086     15.93130226949933
  N   2.20993245105084     -1.95592108958116     16.49026299145543
  H   2.16209123052090     -2.95679990856313     18.32650779224083
  C   2.95344728665852     -1.41421923656060     15.48004743150091
  H   2.40526352104455     -0.95320254228483     14.64695319009097
  C   4.35377783232130     -1.43682415409285     15.49146872008425
  C   5.07868685567804     -0.85615567295727     14.41445358990270
  C   5.72417676298671     -0.35768134116837     13.49066669939856
  C   6.52048514091405      0.21167320691493     12.44166161781307
  C   8.02868606368140      1.31548622252394     10.41157441339259
  C   7.93732469413111      0.15523019289433     12.52647577047682
  N   5.86480472630124      0.78531354188625     11.40503106374652
  C   6.60821601633426      1.32611276796886     10.41081168764126
  C   8.69175628402125      0.71841251382462     11.49036788580701
  H   8.42247197752428     -0.32107440473731     13.39001563305630
  H   9.79108734260830      0.69248651709533     11.52347079747021
  H   8.58660124478420      1.76781552071318      9.57966358547184
  C   5.90426776385938      1.93284742285989      9.31759542477716
  C   5.34002716997768      2.46784576589795      8.36162667961074
  H   2.69255519595545      2.70797184064560      7.98557928840989
  C   3.30877482032822      3.13788712103936      7.18396814238966
  C   4.70689278563991      3.08490002812887      7.24763407557553
  C   3.33320786851450      4.26274374984656      5.12131107354264
  C   5.47816289280231      3.66494181270004      6.16983402219084
  N   2.65083605527381      3.71759696866573      6.13625510217473
  C   4.75139757854956      4.26687281609110      5.08174465405514
  C   6.89833650998238      3.67007185880631      6.13199712880941
  H   4.89021370853037      5.30988956775698      3.16513453752470
  H   2.75546556846947      4.71682542627590      4.30173316013854
  C   7.56501081606774      4.24936586185144      5.05690531813815
  H   7.46302474776776      3.21366492808642      6.95760063683627
  H   8.66546589842870      4.24864673376989      5.03595274797515
  C   6.84626122788645      4.84347385276070      3.98187176388369
  H   7.39681815163834      5.29515072076788      3.14310812166185
  C   5.45875516705952      4.85426750522280      3.98986155422630
  H   -5.92855873925636      5.66512302994563      2.78841534296182
  C   -5.44906495479353      5.18913833366100      3.65685640153292
  H   -3.42960651248452      5.55039240530456      2.94872513868910
  C   -4.06543033139654      5.12755625284259      3.74114070993542
  C   -5.68015850662148      4.02806298581374      5.80175351887479
  C   -3.45063270775400      4.50798727256197      4.87055757017026
  C   -6.25574892140749      4.63709650446625      4.69107018153660
  C   -4.26641332394487      3.94937103241481      5.91784364997141
  C   -2.03891976574949      4.42800098339766      4.98665295222195
  H   -7.35196083728343      4.69323621000656      4.60991843420337
  H   -6.31280117336709      3.60519338899119      6.59523527597763
  N   -1.44254805696724      3.85180862533945      6.03795880359857
  H   -1.39444792044069      4.84742946680701      4.19888514074448
  C   -2.18633526604277      3.31248144191174      7.04924446220045
  H   -1.63844018513214      2.85456354004692      7.88420599159720
  C   -3.58666181912164      3.33461035094831      7.03732460127464
  C   -4.31174492253903      2.75598412214080      8.11529812022726
  C   -4.95730879666489      2.25991472780282      9.04031898164560
  C   -5.75333302659291      1.69446837036272     10.09163557273427
  C   -7.26059316583124      0.59955409936639     12.12723811144304
  C   -7.17015628728321      1.75703324635555     10.01076878993218
  N   -5.09724236627050      1.11905904106280     11.12700588598283
  C   -5.84022189040985      0.58236949407756     12.12373403276738
  C   -7.92411438858193      1.19822403465228     11.04960551422783
  H   -7.65562082268265      2.23501019124023      9.14834341861861
  H   -9.02340663192372      1.22933791099325     11.01982852420435
  H   -7.81797692724658      0.14996531051303     12.96101079882941
  C   -5.13597085108107     -0.02519374569686     13.21621429628900
  C   -4.57167176928279     -0.55835948444156     14.17305859702978
  H   -1.92474475127905     -0.80477886153069     14.54636008917761
  C   -2.54091351015418     -1.23443653968789     15.34814672264144
  C   -3.93892252526359     -1.17823145577150     15.28561844217918
  C   -2.56608654319276     -2.35875844445747     17.41097995051139
  C   -4.71059870785926     -1.75626024114512     16.36417016354103
  N   -1.88331178963277     -1.81581130267113     16.39511599406804
  C   -3.98426825839361     -2.35954276315926     17.45179608842242
  C   -6.13074999291327     -1.75776215491933     16.40328555998429
  H   -4.12393046488559     -3.40161004611146     19.36886695130368
  H   -1.98864001499436     -2.81403157730055     18.23008175054654
  C   -6.79784908020732     -2.33511722943230     17.47915982790021
  H   -6.69507260249219     -1.30033427387382     15.57791718229047
  H   -7.89827957722662     -2.33176902895773     17.50108480219194
  C   -6.07956003020922     -2.93075167550060     18.55366382508172
  H   -6.63046060331607     -3.38090932462531     19.39301808624029
  C   -4.69208124475174     -2.94492521938960     18.54445870914866
  Pd  0.60310912740663      3.77158840148741      6.11233415415765
  Pd  0.16437580676901     -1.87298611803724     16.41780825996267
