# Supplementary material for: Anticancer Activity and Cisplatin Binding Ability of Bis-Quinoline and Bis-Isoquinoline Derived [Pd2L4]4+ Metallosupramolecular Cages
Source: Front Chem. 2018 Nov 22;6:563. doi: 10.3389/fchem.2018.00563 (PMC6262750; doi:10.3389/fchem.2018.00563)
Supplement: Supplementary file 2 [file Data_Sheet_2.ZIP › LFG005.cif]

data_lfg005
_audit_creation_date              2018-01-23
_audit_creation_method
;
Olex2 1.2
(compiled 2017.08.10 svn.r3458 for OlexSys, GUI svn.r5381)
;
_shelx_SHELXL_version_number      '2016/6'
_publ_contact_author_address      ?
_publ_contact_author_email        ?
_publ_contact_author_id_orcid     ?
_publ_contact_author_name         ''
_publ_contact_author_phone        ?
_publ_section_references
;
Dolomanov, O.V., Bourhis, L.J., Gildea, R.J, Howard, J.A.K. & Puschmann, H.
 (2009), J. Appl. Cryst. 42, 339-341.

Sheldrick, G.M. (2015). Acta Cryst. A71, 3-8.

Sheldrick, G.M. (2015). Acta Cryst. C71, 3-8.
;
_chemical_name_common             ?
_chemical_name_systematic         ?
_chemical_formula_moiety          'C108 H60 N12 Pd2, 2(B F4), 8(C2 H3 N)'
_chemical_formula_sum             'C124 H84 B2 F8 N20 Pd2'
_chemical_formula_weight          2240.53
_chemical_melting_point           ?
loop_
  _atom_type_symbol
  _atom_type_description
  _atom_type_scat_dispersion_real
  _atom_type_scat_dispersion_imag
  _atom_type_scat_source
 'C' 'C' 0.0181 0.0091 'International Tables Vol C Tables 4.2.6.8 and 6.1.1.4'
 'H' 'H' 0.0000 0.0000 'International Tables Vol C Tables 4.2.6.8 and 6.1.1.4'
 'B' 'B' 0.0090 0.0039 'International Tables Vol C Tables 4.2.6.8 and 6.1.1.4'
 'F' 'F' 0.0727 0.0534 'International Tables Vol C Tables 4.2.6.8 and 6.1.1.4'
 'N' 'N' 0.0311 0.0180 'International Tables Vol C Tables 4.2.6.8 and 6.1.1.4'
 'Pd' 'Pd' 0.1215 3.9337 'International Tables Vol C Tables 4.2.6.8 and 6.1.1.4'

_shelx_space_group_comment
;
The symmetry employed for this shelxl refinement is uniquely defined
by the following loop, which should always be used as a source of
symmetry information in preference to the above space-group names.
They are only intended as comments.
;
_space_group_crystal_system       'tetragonal'
_space_group_IT_number            128
_space_group_name_H-M_alt         'P 4/m n c'
_space_group_name_Hall            '-P 4 2n'
loop_
  _space_group_symop_operation_xyz
 'x, y, z'
 '-x, -y, z'
 '-y, x, z'
 'y, -x, z'
 '-x+1/2, y+1/2, -z+1/2'
 'x+1/2, -y+1/2, -z+1/2'
 'y+1/2, x+1/2, -z+1/2'
 '-y+1/2, -x+1/2, -z+1/2'
 '-x, -y, -z'
 'x, y, -z'
 'y, -x, -z'
 '-y, x, -z'
 'x-1/2, -y-1/2, z-1/2'
 '-x-1/2, y-1/2, z-1/2'
 '-y-1/2, -x-1/2, z-1/2'
 'y-1/2, x-1/2, z-1/2'

_cell_length_a                    16.9365(2)
_cell_length_b                    16.9365(2)
_cell_length_c                    22.8144(5)
_cell_angle_alpha                 90
_cell_angle_beta                  90
_cell_angle_gamma                 90
_cell_volume                      6544.2(2)
_cell_formula_units_Z             2
_cell_measurement_reflns_used     14917
_cell_measurement_temperature     89.8
_cell_measurement_theta_max       74.5740
_cell_measurement_theta_min       5.2400
_shelx_estimated_absorpt_T_max    ?
_shelx_estimated_absorpt_T_min    ?
_exptl_absorpt_coefficient_mu     2.724
_exptl_absorpt_correction_T_max   1.00000
_exptl_absorpt_correction_T_min   0.66672
_exptl_absorpt_correction_type    Gaussian
_exptl_absorpt_process_details
;
CrysAlisPro 1.171.38.46 (Rigaku Oxford Diffraction, 2015)
Empirical absorption correction using spherical harmonics,
 implemented in SCALE3 ABSPACK scaling algorithm.
;
_exptl_absorpt_special_details    ?
_exptl_crystal_colour             'clear light colourless'
_exptl_crystal_colour_lustre      clear
_exptl_crystal_colour_modifier    light
_exptl_crystal_colour_primary     colourless
_exptl_crystal_density_diffrn     1.137
_exptl_crystal_density_meas       ?
_exptl_crystal_density_method     ?
_exptl_crystal_description        irregular
_exptl_crystal_F_000              2284
_exptl_crystal_preparation        ?
_exptl_crystal_size_max           0.222
_exptl_crystal_size_mid           0.182
_exptl_crystal_size_min           0.109
_exptl_transmission_factor_max    ?
_exptl_transmission_factor_min    ?
_diffrn_reflns_av_R_equivalents   0.0401
_diffrn_reflns_av_unetI/netI      0.0164
_diffrn_reflns_Laue_measured_fraction_full 0.999
_diffrn_reflns_Laue_measured_fraction_max 0.988
_diffrn_reflns_limit_h_max        21
_diffrn_reflns_limit_h_min        -21
_diffrn_reflns_limit_k_max        20
_diffrn_reflns_limit_k_min        -20
_diffrn_reflns_limit_l_max        28
_diffrn_reflns_limit_l_min        -21
_diffrn_reflns_number             35093
_diffrn_reflns_point_group_measured_fraction_full 0.999
_diffrn_reflns_point_group_measured_fraction_max 0.988
_diffrn_reflns_theta_full         67.684
_diffrn_reflns_theta_max          74.691
_diffrn_reflns_theta_min          3.691
_diffrn_ambient_temperature       89.8
_diffrn_detector_area_resol_mean  ?
_diffrn_measured_fraction_theta_full 0.999
_diffrn_measured_fraction_theta_max 0.988
_diffrn_measurement_device_type   'SuperNova, Dual, Cu at zero, Atlas'
_diffrn_measurement_method        ?
_diffrn_radiation_type            CuK\a
_diffrn_radiation_wavelength      1.54184
_diffrn_source                    ?
_reflns_Friedel_coverage          0.000
_reflns_Friedel_fraction_full     .
_reflns_Friedel_fraction_max      .
_reflns_number_gt                 2962
_reflns_number_total              3419
_reflns_special_details
;
 Reflections were merged by SHELXL according to the crystal
 class for the calculation of statistics and refinement.
 
 Structure factors included contributions from the .fab file.
 
 _reflns_Friedel_fraction is defined as the number of unique
 Friedel pairs measured divided by the number that would be
 possible theoretically, ignoring centric projections and
 systematic absences.
;
_reflns_threshold_expression      'I > 2\s(I)'
_computing_cell_refinement        ?
_computing_data_collection        ?
_computing_data_reduction         ?
_computing_molecular_graphics     'Olex2 (Dolomanov et al., 2009)'
_computing_publication_material   'Olex2 (Dolomanov et al., 2009)'
_computing_structure_refinement   'ShelXL (Sheldrick, 2015)'
_computing_structure_solution     'ShelXT (Sheldrick, 2015)'
_refine_diff_density_max          1.223
_refine_diff_density_min          -0.985
_refine_diff_density_rms          0.108
_refine_ls_extinction_coef        .
_refine_ls_extinction_method      none
_refine_ls_goodness_of_fit_ref    1.070
_refine_ls_hydrogen_treatment     constr
_refine_ls_matrix_type            full
_refine_ls_number_parameters      182
_refine_ls_number_reflns          3419
_refine_ls_number_restraints      0
_refine_ls_R_factor_all           0.0779
_refine_ls_R_factor_gt            0.0721
_refine_ls_restrained_S_all       1.070
_refine_ls_shift/su_max           0.000
_refine_ls_shift/su_mean          0.000
_refine_ls_structure_factor_coef  Fsqd
_refine_ls_weighting_details
'w=1/[\s^2^(Fo^2^)+(0.1251P)^2^+10.7651P] where P=(Fo^2^+2Fc^2^)/3'
_refine_ls_weighting_scheme       calc
_refine_ls_wR_factor_gt           0.2000
_refine_ls_wR_factor_ref          0.2079
_refine_special_details           ?
_olex2_refinement_description
;
1. Fixed Uiso
 At 1.2 times of:
  All C(H) groups
 At 1.5 times of:
  All C(H,H,H) groups
2.a Aromatic/amide H refined with riding coordinates:
 C6(H6), C8(H8), C13(H13), C2(H2), C12(H12), C10(H10), C1(H1), C11(H11)
2.b Idealised Me refined as rotating group:
 C16(H16A,H16B,H16C)
;
_atom_sites_solution_hydrogens    geom
_atom_sites_solution_primary      dual
_atom_sites_solution_secondary    ?
loop_
  _atom_site_label
  _atom_site_type_symbol
  _atom_site_fract_x
  _atom_site_fract_y
  _atom_site_fract_z
  _atom_site_U_iso_or_equiv
  _atom_site_adp_type
  _atom_site_occupancy
  _atom_site_site_symmetry_order
  _atom_site_calc_flag
  _atom_site_refinement_flags_posn
  _atom_site_refinement_flags_adp
  _atom_site_refinement_flags_occupancy
  _atom_site_disorder_assembly
  _atom_site_disorder_group
 Pd1 Pd 0.500000 0.500000 0.77408(2) 0.0347(2) Uani 1 4 d S T P . .
 N2 N 0.38351(19) 0.4691(2) 0.76846(12) 0.0390(7) Uani 1 1 d . . . . .
 N1 N 0.2463(3) 0.3481(3) 0.500000 0.0553(12) Uani 1 2 d S T P . .
 C6 C 0.3621(2) 0.4363(2) 0.71834(16) 0.0431(8) Uani 1 1 d . . . . .
 H6 H 0.400911 0.425556 0.690635 0.052 Uiso 1 1 calc R . . . .
 C7 C 0.2836(3) 0.4169(3) 0.70491(18) 0.0510(9) Uani 1 1 d . . . . .
 C14 C 0.3276(2) 0.4845(2) 0.81064(18) 0.0422(8) Uani 1 1 d . . . . .
 C9 C 0.2478(3) 0.4667(3) 0.8005(2) 0.0533(10) Uani 1 1 d . . . . .
 C3 C 0.2215(2) 0.3146(3) 0.55012(19) 0.0542(10) Uani 1 1 d . . . . .
 C8 C 0.2267(2) 0.4333(3) 0.7462(2) 0.0570(10) Uani 1 1 d . . . . .
 H8 H 0.173999 0.422302 0.738257 0.068 Uiso 1 1 calc R . . . .
 C13 C 0.3502(3) 0.5187(3) 0.86469(19) 0.0520(10) Uani 1 1 d . . . . .
 H13 H 0.402853 0.530674 0.872002 0.062 Uiso 1 1 calc R . . . .
 C2 C 0.1732(3) 0.2491(3) 0.55224(19) 0.0545(10) Uani 1 1 d . . . . .
 H2 H 0.157825 0.227772 0.588013 0.065 Uiso 1 1 calc R . . . .
 C12 C 0.2931(3) 0.5341(3) 0.9066(2) 0.0597(11) Uani 1 1 d . . . . .
 H12 H 0.307903 0.557167 0.941941 0.072 Uiso 1 1 calc R . . . .
 C10 C 0.1911(3) 0.4835(3) 0.8451(3) 0.0656(13) Uani 1 1 d . . . . .
 H10 H 0.138085 0.472293 0.838729 0.079 Uiso 1 1 calc R . . . .
 C5 C 0.2641(3) 0.3819(3) 0.6497(2) 0.0600(11) Uani 1 1 d . . . . .
 C4 C 0.2467(3) 0.3521(3) 0.6038(2) 0.0589(11) Uani 1 1 d . . . . .
 C1 C 0.1481(4) 0.2158(4) 0.500000 0.0573(15) Uani 1 2 d S T P . .
 H1 H 0.115118 0.171865 0.500000 0.069 Uiso 1 2 calc RS T P . .
 C11 C 0.2144(3) 0.5159(3) 0.8969(3) 0.0703(14) Uani 1 1 d . . . . .
 H11 H 0.177175 0.525947 0.925968 0.084 Uiso 1 1 calc R . . . .
 F1 F 0.0612(4) 0.4919(3) 0.7137(5) 0.177(3) Uani 1 1 d . . . . .
 N3 N 0.3242(6) 0.2807(6) 0.7996(5) 0.153(3) Uani 1 1 d . . . . .
 B1 B 0.000000 0.500000 0.750000 0.133(9) Uani 1 4 d S T P . .
 C15 C 0.3187(7) 0.2164(7) 0.8026(11) 0.251(11) Uani 1 1 d . . . . .
 C16 C 0.3044(7) 0.1321(8) 0.8354(8) 0.226(9) Uani 1 1 d . . . . .
 H16A H 0.345308 0.095807 0.824283 0.339 Uiso 1 1 calc GR . . . .
 H16B H 0.254019 0.111099 0.824104 0.339 Uiso 1 1 calc GR . . . .
 H16C H 0.305563 0.139796 0.877053 0.339 Uiso 1 1 calc GR . . . .

loop_
  _atom_site_aniso_label
  _atom_site_aniso_U_11
  _atom_site_aniso_U_22
  _atom_site_aniso_U_33
  _atom_site_aniso_U_23
  _atom_site_aniso_U_13
  _atom_site_aniso_U_12
 Pd1 0.0402(3) 0.0402(3) 0.0237(3) 0.000 0.000 0.000
 N2 0.0398(16) 0.0452(17) 0.0321(15) 0.0013(12) 0.0015(12) -0.0037(13)
 N1 0.042(2) 0.074(3) 0.049(3) 0.000 0.000 -0.010(2)
 C6 0.048(2) 0.045(2) 0.0358(17) 0.0017(15) -0.0015(15) -0.0024(16)
 C7 0.050(2) 0.059(2) 0.044(2) 0.0055(18) -0.0056(17) -0.0090(18)
 C14 0.0434(19) 0.0420(18) 0.041(2) 0.0032(15) 0.0070(16) 0.0007(15)
 C9 0.049(2) 0.056(2) 0.055(2) 0.008(2) 0.0067(19) -0.0038(18)
 C3 0.046(2) 0.074(3) 0.043(2) -0.0001(19) -0.0036(17) -0.0053(19)
 C8 0.044(2) 0.063(3) 0.064(3) 0.007(2) -0.004(2) -0.0109(18)
 C13 0.057(2) 0.054(2) 0.045(2) -0.0030(18) 0.0080(19) 0.0000(19)
 C2 0.054(2) 0.070(3) 0.040(2) 0.0013(19) 0.0000(17) -0.007(2)
 C12 0.070(3) 0.061(3) 0.049(2) -0.005(2) 0.018(2) 0.003(2)
 C10 0.051(3) 0.076(3) 0.070(3) 0.011(3) 0.018(2) -0.001(2)
 C5 0.055(2) 0.070(3) 0.055(3) 0.003(2) -0.007(2) -0.016(2)
 C4 0.053(2) 0.077(3) 0.047(2) 0.003(2) -0.0060(19) -0.012(2)
 C1 0.055(3) 0.067(4) 0.051(3) 0.000 0.000 -0.012(3)
 C11 0.066(3) 0.081(3) 0.064(3) 0.006(3) 0.028(3) 0.008(3)
 F1 0.076(4) 0.142(5) 0.313(11) 0.010(4) 0.030(4) 0.028(3)
 N3 0.157(8) 0.122(7) 0.181(9) 0.038(6) -0.042(7) -0.019(6)
 B1 0.063(7) 0.063(7) 0.27(3) 0.000 0.000 0.033(7)
 C15 0.109(8) 0.080(6) 0.56(3) -0.018(12) -0.036(13) -0.011(5)
 C16 0.121(8) 0.175(12) 0.38(2) -0.127(14) -0.029(12) 0.015(8)

_geom_special_details
;
 All esds (except the esd in the dihedral angle between two l.s. planes)
 are estimated using the full covariance matrix.  The cell esds are taken
 into account individually in the estimation of esds in distances, angles
 and torsion angles; correlations between esds in cell parameters are only
 used when they are defined by crystal symmetry.  An approximate (isotropic)
 treatment of cell esds is used for estimating esds involving l.s. planes.
;
loop_
  _geom_bond_atom_site_label_1
  _geom_bond_atom_site_label_2
  _geom_bond_distance
  _geom_bond_site_symmetry_2
  _geom_bond_publ_flag
 Pd1 N2 2.045(3) 2_665 ?
 Pd1 N2 2.045(3) 4_565 ?
 Pd1 N2 2.045(3) . ?
 Pd1 N2 2.045(3) 3_655 ?
 N2 C6 1.322(5) . ?
 N2 C14 1.375(5) . ?
 N1 C3 1.344(5) . ?
 N1 C3 1.344(5) 10_556 ?
 C6 H6 0.9300 . ?
 C6 C7 1.403(6) . ?
 C7 C8 1.376(7) . ?
 C7 C5 1.431(6) . ?
 C14 C9 1.404(6) . ?
 C14 C13 1.415(6) . ?
 C9 C8 1.406(7) . ?
 C9 C10 1.429(7) . ?
 C3 C2 1.379(6) . ?
 C3 C4 1.444(6) . ?
 C8 H8 0.9300 . ?
 C13 H13 0.9300 . ?
 C13 C12 1.384(6) . ?
 C2 H2 0.9300 . ?
 C2 C1 1.386(5) . ?
 C12 H12 0.9300 . ?
 C12 C11 1.387(8) . ?
 C10 H10 0.9300 . ?
 C10 C11 1.361(9) . ?
 C5 C4 1.200(6) . ?
 C1 H1 0.9300 . ?
 C11 H11 0.9300 . ?
 F1 B1 1.334(7) . ?
 N3 C15 1.096(13) . ?
 C15 C16 1.63(2) . ?
 C16 H16A 0.9600 . ?
 C16 H16B 0.9600 . ?
 C16 H16C 0.9600 . ?

loop_
  _geom_angle_atom_site_label_1
  _geom_angle_atom_site_label_2
  _geom_angle_atom_site_label_3
  _geom_angle
  _geom_angle_site_symmetry_1
  _geom_angle_site_symmetry_3
  _geom_angle_publ_flag
 N2 Pd1 N2 89.775(10) 2_665 3_655 ?
 N2 Pd1 N2 172.80(16) 2_665 . ?
 N2 Pd1 N2 89.774(11) 4_565 . ?
 N2 Pd1 N2 172.81(16) 3_655 4_565 ?
 N2 Pd1 N2 89.774(11) 3_655 . ?
 N2 Pd1 N2 89.775(11) 2_665 4_565 ?
 C6 N2 Pd1 115.3(3) . . ?
 C6 N2 C14 119.8(3) . . ?
 C14 N2 Pd1 124.8(3) . . ?
 C3 N1 C3 116.6(5) 10_556 . ?
 N2 C6 H6 118.4 . . ?
 N2 C6 C7 123.2(4) . . ?
 C7 C6 H6 118.4 . . ?
 C6 C7 C5 120.5(4) . . ?
 C8 C7 C6 117.8(4) . . ?
 C8 C7 C5 121.7(4) . . ?
 N2 C14 C9 120.4(4) . . ?
 N2 C14 C13 120.1(4) . . ?
 C9 C14 C13 119.5(4) . . ?
 C14 C9 C8 118.5(4) . . ?
 C14 C9 C10 119.1(4) . . ?
 C8 C9 C10 122.4(4) . . ?
 N1 C3 C2 123.7(4) . . ?
 N1 C3 C4 116.3(4) . . ?
 C2 C3 C4 120.0(4) . . ?
 C7 C8 C9 120.4(4) . . ?
 C7 C8 H8 119.8 . . ?
 C9 C8 H8 119.8 . . ?
 C14 C13 H13 120.3 . . ?
 C12 C13 C14 119.4(4) . . ?
 C12 C13 H13 120.3 . . ?
 C3 C2 H2 120.7 . . ?
 C3 C2 C1 118.7(4) . . ?
 C1 C2 H2 120.7 . . ?
 C13 C12 H12 119.4 . . ?
 C13 C12 C11 121.3(5) . . ?
 C11 C12 H12 119.4 . . ?
 C9 C10 H10 119.8 . . ?
 C11 C10 C9 120.4(5) . . ?
 C11 C10 H10 119.8 . . ?
 C4 C5 C7 179.0(5) . . ?
 C5 C4 C3 176.5(5) . . ?
 C2 C1 C2 118.6(6) 10_556 . ?
 C2 C1 H1 120.7 10_556 . ?
 C2 C1 H1 120.7 . . ?
 C12 C11 H11 119.8 . . ?
 C10 C11 C12 120.4(5) . . ?
 C10 C11 H11 119.8 . . ?
 F1 B1 F1 123.0(7) 2_565 8_556 ?
 F1 B1 F1 103.0(6) 7_456 2_565 ?
 F1 B1 F1 103.3(8) . 2_565 ?
 F1 B1 F1 103.0(6) . 8_556 ?
 F1 B1 F1 123.0(7) . 7_456 ?
 F1 B1 F1 103.3(8) 7_456 8_556 ?
 N3 C15 C16 156(2) . . ?
 C15 C16 H16A 109.5 . . ?
 C15 C16 H16B 109.5 . . ?
 C15 C16 H16C 109.5 . . ?
 H16A C16 H16B 109.5 . . ?
 H16A C16 H16C 109.5 . . ?
 H16B C16 H16C 109.5 . . ?

_shelx_res_file
;
TITL lfg-005_a.res in P4/mnc
    lfg005.res
    created by SHELXL-2016/6 at 13:23:37 on 23-Jan-2018
REM Old TITL LFG-005 in P4/mnc
REM SHELXT solution in P4/mnc
REM R1 0.154, Rweak 0.003, Alpha 0.065, Orientation as input
REM Formula found by SHELXT: C131 B4 N36 F8 Pd2
CELL 1.54184 16.9365 16.9365 22.8144 90 90 90
ZERR 2 0.0002 0.0002 0.0005 0 0 0
LATT 1
SYMM -X,-Y,+Z
SYMM -Y,+X,+Z
SYMM +Y,-X,+Z
SYMM 0.5-X,0.5+Y,0.5-Z
SYMM 0.5+X,0.5-Y,0.5-Z
SYMM 0.5+Y,0.5+X,0.5-Z
SYMM 0.5-Y,0.5-X,0.5-Z
SFAC C H B F N Pd
UNIT 248 168 4 16 40 4

L.S. 50 0 37
PLAN  5
BOND $H
list 4
ABIN
fmap 2
acta
OMIT 0 0 8
OMIT 2 2 8
REM <olex2.extras>
REM <HklSrc "%.\\LFG005.hkl">
REM </olex2.extras>

WGHT    0.125100   10.765100
FVAR       0.19371
PD1   6    0.500000    0.500000    0.774082    10.25000    0.04020    0.04020 =
         0.02366    0.00000    0.00000    0.00000
N2    5    0.383514    0.469068    0.768456    11.00000    0.03983    0.04524 =
         0.03205    0.00131    0.00147   -0.00372
N1    5    0.246258    0.348150    0.500000    10.50000    0.04231    0.07447 =
         0.04913    0.00000    0.00000   -0.01009
C6    1    0.362086    0.436298    0.718337    11.00000    0.04814    0.04527 =
         0.03576    0.00168   -0.00152   -0.00236
AFIX  43
H6    2    0.400911    0.425556    0.690635    11.00000   -1.20000
AFIX   0
C7    1    0.283590    0.416935    0.704912    11.00000    0.04990    0.05884 =
         0.04436    0.00552   -0.00558   -0.00902
C14   1    0.327628    0.484531    0.810641    11.00000    0.04345    0.04202 =
         0.04108    0.00318    0.00705    0.00067
C9    1    0.247849    0.466689    0.800465    11.00000    0.04863    0.05601 =
         0.05522    0.00781    0.00673   -0.00381
C3    1    0.221483    0.314633    0.550119    11.00000    0.04573    0.07391 =
         0.04299   -0.00013   -0.00362   -0.00530
C8    1    0.226705    0.433335    0.746236    11.00000    0.04390    0.06314 =
         0.06402    0.00681   -0.00441   -0.01086
AFIX  43
H8    2    0.173999    0.422302    0.738257    11.00000   -1.20000
AFIX   0
C13   1    0.350176    0.518698    0.864691    11.00000    0.05705    0.05417 =
         0.04491   -0.00300    0.00804    0.00000
AFIX  43
H13   2    0.402853    0.530674    0.872002    11.00000   -1.20000
AFIX   0
C2    1    0.173223    0.249129    0.552241    11.00000    0.05421    0.06963 =
         0.03953    0.00131   -0.00002   -0.00660
AFIX  43
H2    2    0.157825    0.227772    0.588013    11.00000   -1.20000
AFIX   0
C12   1    0.293127    0.534141    0.906597    11.00000    0.06950    0.06069 =
         0.04876   -0.00464    0.01771    0.00269
AFIX  43
H12   2    0.307903    0.557167    0.941941    11.00000   -1.20000
AFIX   0
C10   1    0.191144    0.483533    0.845100    11.00000    0.05111    0.07558 =
         0.06997    0.01084    0.01778   -0.00059
AFIX  43
H10   2    0.138085    0.472293    0.838729    11.00000   -1.20000
AFIX   0
C5    1    0.264066    0.381935    0.649690    11.00000    0.05504    0.07011 =
         0.05492    0.00277   -0.00735   -0.01584
C4    1    0.246736    0.352102    0.603768    11.00000    0.05279    0.07663 =
         0.04732    0.00306   -0.00603   -0.01227
C1    1    0.148121    0.215751    0.500000    10.50000    0.05473    0.06652 =
         0.05052    0.00000    0.00000   -0.01173
AFIX  43
H1    2    0.115118    0.171865    0.500000    10.50000   -1.20000
AFIX   0
C11   1    0.214353    0.515944    0.896902    11.00000    0.06607    0.08131 =
         0.06351    0.00648    0.02766    0.00785
AFIX  43
H11   2    0.177175    0.525947    0.925968    11.00000   -1.20000
AFIX   0

F1    4    0.061228    0.491890    0.713743    11.00000    0.07634    0.14191 =
         0.31312    0.01020    0.02989    0.02840
N3    5    0.324219    0.280742    0.799618    11.00000    0.15730    0.12226 =
         0.18093    0.03794   -0.04223   -0.01911
B1    3    0.000000    0.500000    0.750000    10.25000    0.06349    0.06349 =
         0.27302    0.00000    0.00000    0.03262
C15   1    0.318657    0.216383    0.802567    11.00000    0.10903    0.07992 =
         0.56305   -0.01783   -0.03622   -0.01102
C16   1    0.304425    0.132116    0.835371    11.00000    0.12130    0.17471 =
         0.38198   -0.12733   -0.02868    0.01532
AFIX 137
H16A  2    0.345308    0.095807    0.824283    11.00000   -1.50000
H16B  2    0.254019    0.111099    0.824104    11.00000   -1.50000
H16C  2    0.305563    0.139796    0.877053    11.00000   -1.50000
AFIX   0
HKLF 4


REM  lfg-005_a.res in P4/mnc
REM R1 =  0.0721 for    2962 Fo > 4sig(Fo)  and  0.0779 for all    3419 data
REM    182 parameters refined using      0 restraints

END

WGHT      0.1250     10.7797

REM Highest difference peak  1.223,  deepest hole -0.985,  1-sigma level  0.108
Q1    1   0.0621  0.5621  0.7500  10.50000  0.05    1.22
Q2    1   0.4599  0.4563  0.7716  11.00000  0.05    1.22
Q3    1   0.3189  0.2179  0.8196  11.00000  0.05    0.58
Q4    1   0.0731  0.4646  0.7305  11.00000  0.05    0.54
Q5    1   0.3077  0.0707  0.8799  11.00000  0.05    0.42
;
_shelx_res_checksum               68925
_shelx_hkl_file
;
   0   0   2 6696.43   55.86
   0   0  -2 6447.14   55.90
   0   0   3    0.16    0.36
   0   0   3   -0.27    0.57
   0   0  -3    0.24    0.60
   0   0   4 5643.76   51.48
   0   0  -4 5549.93   53.90
   0   0   5    0.39    0.67
   0   0  -5   -0.29    0.93
   0   0  -6 1065.25   17.26
   0   0   6 1067.83   15.37
   0   0   7   -0.28    0.88
   0   0  -7   -0.41    1.18
   0   0  -8  866.34   17.31
   0   0   8  890.90   14.93
   0   0   9    0.30    0.78
   0   0  -9    0.73    1.31
   0   0  10  923.54   16.87
   0   0 -10  950.51   20.13
   0   0  11    1.33    1.14
   0   0 -11   -0.04    1.53
   0   0 -12  190.29   11.39
   0   0  12  145.60    6.73
   0   0 -13    0.00    1.50
   0   0  13    0.00    0.95
   0   0 -14  225.19   11.70
   0   0  14  221.53    9.22
   0   0  15   -0.51    1.07
   0   0 -15    1.91    1.62
   0   0 -16  165.80   10.70
   0   0  16  161.30    8.49
   0   0  16  161.65    5.46
   0   0  17    0.10    1.02
   0   0  17    0.74    0.82
   0   0 -17    0.28    1.80
   0   0 -18  535.08   21.22
   0   0  18  503.72   16.08
   0   0  18  540.16   11.14
   0   0  19    0.18    1.02
   0   0 -19    1.42    2.11
   0   0  20  151.37    5.87
   0   0 -20  144.25   11.40
   0   0  21    0.37    0.96
   0   0  22  562.67   11.94
   0   0  23    0.78    1.13
   0   0  24  183.78    6.21
   0   0  25    0.02    0.94
   0   0  26   72.64    3.49
   0   0  27   -0.57    0.79
   0   0  28   36.22    1.91
   0   1   2    0.16    0.37
  -1   0  -2   -0.04    0.36
  -1   0   2    0.13    0.23
   1   0   2    0.04    0.34
  -1   0   2    0.37    0.42
   1   0   3  858.46   10.70
  -1   0   3  854.82    9.44
  -1   0  -4    0.15    0.69
   0   1   4   -0.12    0.84
   1   0   4   -0.18    0.81
   0   1   4    0.03    0.61
  -1   0   4    0.26    0.50
   0  -1   5  954.59   12.65
   0   1   5  951.82   13.55
  -1   0   5  943.43   12.58
  -1   0  -5  990.93   14.97
   0   1   5  925.28   14.68
   0  -1  -5  943.61   14.70
   0   1   6    0.18    0.79
   1   0   6    0.50    1.00
   0  -1  -6    1.00    1.21
  -1   0  -6    0.06    1.16
  -1   0   6    1.28    0.79
   0   1   6    1.51    1.30
   0  -1   6   -0.02    0.74
   0   1   7  804.73   15.71
  -1   0   7  837.44   13.02
   0  -1   7  872.92   13.23
  -1   0  -7  830.74   15.50
   0   1  -7  841.16   16.10
   1   0  -7  792.77   16.43
   0  -1  -7  833.48   15.40
   0   1   7  808.24   13.83
   1   0   7  857.16   14.35
  -1   0  -8    0.47    1.30
   1   0  -8    0.15    1.25
   1   0   8    0.35    0.96
   0  -1   8    0.23    0.77
   0   1   8    0.22    1.05
   0  -1  -8    0.00    1.12
  -1   0   8    0.22    0.78
   0   1  -8    0.16    1.18
   0  -1   9  438.45   10.07
  -1   0   9  453.13   10.12
   0  -1  -9  464.11   12.41
   1   0  -9  465.93   13.24
   1   0   9  445.57   10.92
  -1   0  -9  467.65   12.71
   0   1   9  460.62   11.01
   0   1  -9  462.46   13.12
   0   1  10   -0.37    1.04
  -1   0 -10    1.43    2.13
   1   0  10    0.17    0.93
   0  -1  10    0.08    0.79
  -1   0  10    0.36    0.88
   1   0 -10    1.90    1.95
   0  -1 -10    0.75    1.77
   0   1 -10    1.34    2.23
   0   1  11  738.92   15.83
  -1   0  11  681.79   14.50
   1   0 -11  717.05   18.74
   0   1 -11  741.04   19.04
   0  -1  11  740.18   14.96
   0  -1 -11  725.13   18.02
   1   0  11  709.93   15.74
  -1   0 -11  730.94   18.25
  -1   0  12   -1.23    1.08
   1   0 -12    1.34    1.89
   0  -1  12    0.76    0.83
   0  -1 -12    0.96    2.11
   0   1  12   -0.66    1.02
   0   1 -12    0.77    1.80
  -1   0 -12    2.11    1.91
   1   0  12   -0.40    1.08
   0   1 -13  619.95   19.15
   0  -1 -13  651.37   18.70
   1   0  13  591.09   15.34
  -1   0 -13  610.99   18.04
   0   1  13  602.54   15.40
  -1   0  13  596.75   14.57
   1   0 -13  605.12   18.76
   0  -1  13  600.08   14.53
  -1   0 -14    0.60    1.41
  -1   0  14    1.29    1.09
   0  -1  14   -0.35    1.01
   1   0 -14    0.52    1.60
   1   0  14   -0.30    1.13
   0  -1 -14   -0.36    1.37
   0   1 -14    0.01    1.59
   0   1  14   -0.96    1.22
  -1   0  15  150.90    7.62
   0  -1 -15  158.07    9.85
   0  -1  15  143.18    7.38
  -1   0 -15  156.53    9.79
   0   1 -15  155.93   10.16
   1   0 -15  157.92   10.38
   1   0  15  146.04    7.90
   0   1  15  146.19    7.97
  -1   0  16    0.64    0.73
   0   1  16   -0.46    1.25
  -1   0 -16    0.34    1.63
   0  -1  16    0.01    0.70
   1   0 -16   -0.78    1.76
   0   1 -16    0.26    1.54
   0   1  16   -0.46    0.72
   0  -1  16    0.16    1.03
   1   0  16   -0.08    0.79
  -1   0  16    0.94    1.06
   1   0  16   -0.52    1.01
   0  -1 -16   -0.25    1.59
   0  -1 -17  312.27   15.20
   0   1 -17  316.06   15.97
   0  -1  17  302.58    7.96
   0   1  17  306.76   12.47
   1   0  17  311.97   12.56
  -1   0  17  316.65   11.95
   1   0 -17  318.75   15.93
   1   0  17  319.52    7.96
   0   1  17  297.84    7.98
  -1   0  17  312.71    8.02
   0  -1  17  325.05   12.01
  -1   0 -17  324.48   15.49
   0   1  18   -1.28    1.52
   0   1 -18   -0.82    1.70
   1   0 -18   -0.14    1.97
   1   0  18    0.08    0.78
  -1   0 -18   -1.33    1.69
  -1   0  18    0.12    0.97
   0  -1  18   -0.61    1.01
   1   0  18   -0.82    1.41
   0   1  18   -0.26    0.91
   0  -1 -18   -0.64    1.54
   0   1  19  167.06    9.58
  -1   0 -19  174.56   12.14
   1   0  19  180.04    6.23
   0  -1  19  178.05    6.25
   0   1 -19  169.63   12.27
   1   0 -19  189.52   13.02
   0  -1 -19  175.91   12.17
  -1   0  19  190.68    6.54
   0   1  19  190.64    6.52
   1   0 -20    0.56    2.13
  -1   0  20   -0.28    1.22
  -1   0 -20    0.32    1.73
   0  -1  20   -0.70    1.25
   1   0  20   -0.91    1.23
   0   1 -20    0.50    2.18
   0   1  20    0.11    1.08
  -1   0  21  153.34    6.05
   0  -1  21  154.52    6.05
   0   1  21  154.49    6.06
   1   0  21  155.56    5.90
   0   1  22    0.45    1.10
   1   0  22    0.48    1.09
  -1   0  22    0.83    1.05
   0  -1  22    0.31    1.13
   0   1  23    5.55    1.50
   0  -1  23    6.71    1.52
   1   0  23    5.24    1.30
  -1   0  23    5.86    1.40
   0   1  24    0.37    1.15
   0  -1  24    1.18    1.06
   1   0  24   -0.51    1.04
  -1   0  24    0.08    1.14
   0  -1  25   28.44    2.38
   0   1  25   29.70    2.48
  -1   0  25   28.96    2.43
   1   0  25   29.90    2.46
  -1   0  26    0.29    0.84
   1   0  26   -0.06    0.83
   0   1  26    0.67    0.86
   0  -1  26   -0.75    0.87
   0  -1  27   28.46    1.97
  -1   0  27   26.92    1.92
   0   1  27   26.50    1.94
   1   0  27   27.95    1.97
   1   0  28   -0.25    0.54
  -1   0  28   -0.04    0.51
   0  -1  28   -0.46    0.52
   0   1  28   -0.09    0.51
   1  -1   0 4228.59   37.09
   1   1   1    0.60    0.37
  -1   1   1    0.04    0.29
  -1  -1  -1    0.14    0.18
  -1  -1   2  679.01    6.53
   1   1   2  677.67    8.73
  -1   1   2  639.70    8.87
  -1  -1  -2  699.29    7.88
  -1  -1   2  648.81    9.63
  -1  -1   3    0.61    0.77
  -1  -1  -3    0.52    0.44
  -1   1   3    0.51    0.49
  -1  -1   3    0.24    0.26
   1   1   3    0.05    0.58
  -1   1   3   -0.19    0.65
  -1  -1  -4  534.55    8.78
  -1   1   4  502.62    9.38
  -1  -1   4  513.27    9.78
   1   1   4  510.51    9.01
  -1  -1   4  515.34    7.01
  -1   1   4  521.80    8.37
  -1   1   5    0.61    0.85
  -1  -1   5    0.45    0.56
   1   1   5    0.23    1.09
  -1  -1  -5    0.07    0.80
  -1   1   5    0.84    1.27
  -1   1   6  453.98    8.89
   1   1   6  444.40   10.12
  -1  -1  -6  466.59    9.93
  -1  -1   6  462.45    7.95
  -1   1   6  452.47   10.60
   1   1   7    0.89    1.20
  -1   1   7   -0.23    1.32
   1   1   7    0.66    0.85
  -1   1  -7    2.41    1.84
   1   1  -7    0.14    1.21
  -1  -1  -7    1.46    1.18
  -1   1   7    0.51    0.72
  -1  -1   7    0.53    0.54
  -1   1   8  474.98   10.42
   1   1  -8  489.99   13.17
   1  -1   8  512.10   10.96
   1   1   8  463.87   12.11
   1   1   8  487.84   11.22
  -1  -1   8  473.03    9.43
  -1  -1  -8  492.65   11.88
   1  -1  -8  481.03   12.78
  -1   1  -8  492.10   12.62
  -1  -1   9    0.38    0.63
   1  -1   9   -0.05    0.84
  -1  -1  -9    1.58    1.53
  -1   1  -9    1.57    1.44
   1  -1  -9    0.53    1.34
  -1   1   9    0.49    0.83
   1   1  -9    1.14    1.83
   1   1   9    0.51    1.02
   1  -1  10   47.96    3.54
   1   1 -10   49.15    4.80
  -1  -1 -10   53.41    4.60
  -1   1 -10   51.98    4.74
  -1  -1  10   46.64    3.15
   1   1  10   48.59    3.71
  -1   1  10   44.64    3.36
   1  -1 -10   48.18    4.48
   1   1 -11    3.69    2.54
  -1  -1 -11    3.39    2.39
  -1   1  11    0.83    1.03
   1  -1  11    1.03    1.08
  -1  -1  11    0.17    0.75
   1  -1 -11    1.83    1.89
   1   1  11    0.35    1.31
  -1   1 -11    3.41    2.49
  -1   1 -12  292.80   11.94
   1   1  12  290.05   10.16
   1  -1 -12  294.63   11.97
  -1   1  12  281.13    9.62
   1   1 -12  313.81   13.24
   1  -1  12  296.80    9.84
  -1  -1  12  300.26    9.11
  -1  -1 -12  305.68   11.64
  -1   1 -13    0.18    1.69
   1  -1 -13    1.01    1.43
  -1  -1 -13   -0.46    1.39
  -1  -1  13   -0.40    0.84
  -1   1  13    0.25    0.89
   1  -1  13   -0.24    1.05
   1   1 -13   -0.59    1.80
   1   1  13   -0.19    1.19
  -1   1  14  164.49    7.93
   1   1 -14  173.61   10.47
  -1  -1 -14  176.92    9.74
  -1  -1  14  162.82    7.30
   1  -1 -14  168.24   10.01
   1  -1  14  175.58    8.14
   1   1  14  164.21    8.26
  -1   1 -14  173.28   10.12
   1   1 -15    0.39    1.81
   1  -1 -15    2.19    1.70
  -1  -1 -15   -0.22    1.54
  -1  -1  15    0.54    0.77
  -1   1 -15    1.76    2.03
   1  -1  15    0.65    1.09
   1   1  15   -1.05    1.26
  -1   1  15   -0.39    0.88
   1  -1 -16  217.90   12.46
   1  -1  16  211.04    6.18
   1  -1  16  204.10    9.49
  -1   1 -16  219.43   12.40
   1   1  16  210.42    6.18
  -1  -1  16  209.28    6.24
   1   1  16  204.40   10.03
  -1   1  16  206.20    9.56
  -1   1  16  210.80    6.24
  -1  -1  16  205.48    8.84
   1   1 -16  206.81   12.48
  -1  -1 -16  213.86   11.81
   1  -1  17   -0.92    1.08
   1   1  17    1.10    1.30
  -1  -1 -17    0.53    1.87
   1   1 -17   -0.18    1.78
   1  -1  17    0.41    0.85
   1   1  17    0.80    0.85
   1  -1 -17   -0.03    1.59
  -1   1  17    0.59    0.87
  -1   1  17    0.28    1.20
  -1   1 -17    0.35    1.91
  -1  -1  17   -0.07    0.76
  -1   1 -18  218.31   13.40
   1   1  18  206.95    6.59
   1   1 -18  221.71   13.89
  -1   1  18  195.31    9.84
  -1  -1  18  211.27    6.62
   1  -1 -18  200.20   12.80
  -1  -1 -18  210.33   12.72
   1  -1  18  215.07    6.58
  -1   1  18  210.71    6.74
   1   1  18  197.17   10.50
  -1   1 -19    0.98    1.85
   1   1  19    0.85    0.90
  -1  -1  19    1.70    1.12
   1   1 -19    0.00    1.86
  -1   1  19    1.17    1.10
   1  -1  19   -0.47    0.96
   1  -1 -19   -0.07    1.99
  -1  -1 -19    0.28    1.52
   1   1  19    1.35    1.19
  -1  -1  20  335.28    8.85
  -1   1  20  326.44    8.99
  -1   1 -20  321.08   17.20
   1  -1 -20  312.17   16.76
   1   1 -20  328.86   18.00
   1   1  20  334.25    8.87
   1  -1  20  333.70    8.79
   1   1  21    0.93    0.98
   1  -1  21    0.55    1.05
  -1  -1  21    0.58    1.20
  -1   1  21   -0.45    1.03
   1  -1  22  381.20    9.54
   1   1  22  377.16    9.66
  -1  -1  22  388.43    9.74
  -1   1  22  377.63    9.72
   1  -1  23    0.28    1.02
   1   1  23    0.52    1.01
  -1  -1  23   -0.84    1.20
  -1   1  23   -0.45    1.26
  -1   1  24  152.82    5.81
  -1  -1  24  156.28    5.61
   1  -1  24  158.98    5.53
   1   1  24  154.87    5.83
   1  -1  25   -0.48    1.02
  -1  -1  25    0.61    0.92
   1   1  25    0.11    0.92
  -1   1  25   -0.31    0.86
   1  -1  26   67.27    3.26
  -1  -1  26   65.03    3.24
   1   1  26   64.15    3.33
  -1   1  26   64.74    3.33
  -1  -1  27    0.91    0.81
   1  -1  27    0.04    0.63
   1   1  27    0.66    0.74
  -1   1  27    0.12    0.64
   1  -1  28   27.65    1.65
  -1   1  28   26.70    1.66
   1   1  28   26.45    1.61
  -1  -1  28   27.01    1.62
   0  -2   0 2011.12   21.36
   0   2   0 2028.49   19.48
   0   2   1    0.58    0.39
  -2   0   1    0.14    0.36
   0   2  -1    0.05    0.43
  -2   0  -1    0.04    0.44
   0  -2   1    0.42    0.65
   0  -2  -1   -0.15    0.48
   0   2   1    0.15    0.53
   0   2   2 3491.29   33.35
  -2   0  -2 3525.22   34.23
   0   2  -2 3571.14   34.76
  -2   0   2 3451.15   32.81
   2   0   2 3548.78   31.56
   2   0   3   -0.03    0.55
  -2   0   3    0.10    0.66
   0   2   3    0.09    0.77
  -2   0  -3    0.45    0.72
  -2   0   3   -0.07    0.41
   0   2  -3    0.34    0.79
  -2   0   4 1503.13   16.47
   0   2   4 1407.66   18.80
   2   0   4 1442.17   17.83
  -2   0  -4 1481.42   18.92
   0   2   5    0.06    1.00
  -2   0  -5   -0.40    1.14
  -2   0   5    0.28    0.60
   0   2   6 1352.06   20.17
  -2   0  -6 1353.92   19.82
   0  -2  -6 1312.83   19.23
   0  -2  -7   -0.08    0.80
  -2   0   7    0.09    0.59
   0   2   7    0.51    1.06
   0   2  -7   -0.10    1.17
   0  -2   7    0.07    0.69
   0   2   7    0.76    1.25
  -2   0  -7    0.25    1.06
   0   2  -8  719.17   16.31
  -2   0  -8  762.84   15.73
   2   0   8  765.82   14.81
  -2   0   8  743.91   12.71
   0  -2  -8  746.20   14.94
   0   2   8  749.02   14.20
   0  -2   8  737.15   12.37
   0   2   8  729.77   15.77
  -2   0  -9    0.45    1.23
   0   2   9    1.00    1.14
   0   2  -9    0.43    1.42
   2   0   9   -0.34    1.08
   0  -2   9    0.30    0.78
   0   2   9    0.50    1.40
   0  -2  -9   -0.56    1.12
  -2   0   9    0.22    0.69
   0   2  10    3.42    1.52
  -2   0  10    2.31    1.34
  -2   0 -10    3.00    2.06
   0  -2  10    1.95    1.16
   2   0 -10    2.87    2.44
   0   2  10    2.03    1.88
   2   0  10    2.86    1.58
   0  -2 -10    3.22    1.97
   0   2 -10    6.35    2.82
   0  -2 -11   -0.16    1.24
   0  -2  11    0.77    1.01
   2   0  11    1.34    1.59
  -2   0 -11    1.28    1.51
   0   2  11    1.13    1.41
   0   2 -11    0.73    1.76
  -2   0  11    0.78    1.09
   2   0 -11   -0.20    1.68
   0  -2 -12   71.66    5.69
   0   2 -12   76.83    6.39
   2   0  12   66.67    5.03
  -2   0 -12   75.04    5.84
  -2   0  12   72.12    4.53
   0   2  12   76.30    5.11
   0  -2  12   68.68    4.33
   2   0 -12   73.96    6.44
  -2   0 -13    0.48    1.65
  -2   0  13    0.71    1.23
   0   2  13    1.02    1.17
   0  -2 -13   -0.32    1.40
   2   0 -13    0.84    1.71
   0  -2  13    0.33    0.78
   0   2 -13   -0.30    1.77
   2   0  13    0.39    1.29
   2   0  14  108.23    6.84
   0  -2  14  105.10    5.85
   2   0 -14  107.39    8.36
   0   2  14  108.70    6.76
  -2   0 -14  106.75    7.73
   0   2 -14  102.90    8.05
  -2   0  14  110.20    6.06
   0  -2 -14  111.09    7.79
   2   0  15    1.24    1.14
  -2   0 -15   -0.56    1.48
   0  -2 -15   -0.26    1.43
   2   0 -15    1.55    1.94
  -2   0  15   -0.96    1.19
   0   2  15   -0.71    1.63
   0  -2  15   -0.14    0.91
   0   2 -15   -1.97    2.53
   0  -2 -16  398.18   16.14
   0  -2  16  368.37    8.65
  -2   0  16  381.40    8.67
   2   0  16  386.35    8.51
   2   0 -16  397.61   17.73
   2   0  16  374.16   13.93
   0   2  16  372.80   13.77
  -2   0  16  399.96   12.73
   0   2  16  383.02    8.84
   0   2 -16  368.66   16.84
  -2   0 -16  380.86   16.23
   0  -2  17    0.22    0.85
   0  -2 -17    0.36    1.44
   0   2 -17    1.34    2.00
   0   2  17    0.86    1.44
   2   0  17    0.45    0.94
  -2   0 -17    1.25    1.66
   2   0 -17    1.10    2.00
   2   0  17   -0.86    1.66
   0   2  17   -0.04    0.78
  -2   0  17   -0.12    0.78
   0  -2  18   97.59    4.50
  -2   0  18  104.65    4.68
   0   2 -18  109.89    9.89
   0   2  18   96.53    7.44
   0  -2 -18   99.91    8.66
   2   0  18   97.29    7.30
   2   0  18   99.66    4.41
   0   2  18   99.30    4.63
  -2   0 -18  102.95    9.07
   2   0 -19    0.22    2.15
  -2   0  19    0.60    1.10
   0  -2  19    1.79    1.05
   2   0  19    2.28    1.83
  -2   0 -19   -1.44    1.92
   0   2  19    1.34    1.38
   2   0  19    1.22    1.13
   0   2  19    0.26    0.94
   0   2 -19    0.29    2.35
   0   2  20  792.44   14.67
   0  -2  20  792.86   14.23
   0   2 -20  769.68   27.77
   2   0  20  755.96   13.92
  -2   0  20  755.54   14.40
   2   0 -20  728.30   27.00
  -2   0  21   -0.18    1.12
   2   0  21   -0.76    1.06
   0  -2  21    0.40    1.08
   0   2  21    0.47    1.11
   0   2  22  197.28    6.91
  -2   0  22  189.63    6.54
   2   0  22  187.94    6.51
   0  -2  22  193.01    6.60
   0  -2  23    0.27    1.02
   0   2  23    0.64    1.12
  -2   0  23   -0.53    1.08
   2   0  23   -0.67    0.99
  -2   0  24  153.01    5.60
   0  -2  24  156.45    5.49
   0   2  24  156.51    5.84
   2   0  24  150.16    5.43
   0   2  25    0.26    0.92
   0  -2  25   -0.41    0.86
  -2   0  25   -0.67    1.03
   2   0  25    0.37    0.87
   0  -2  26   76.33    3.38
   0   2  26   75.62    3.58
  -2   0  26   74.97    3.51
   2   0  26   78.28    3.50
   0  -2  27    0.41    0.68
   2   0  27    0.31    0.67
   0   2  27    0.53    0.64
  -2   0  27   -0.69    0.68
  -2   0  28   20.72    1.43
   0  -2  28   22.58    1.48
   2   0  28   22.25    1.44
   0   2  28   21.20    1.48
  -1   2   0  283.36    5.31
   1   2   0  280.80    4.11
  -2   1   0  275.88    3.72
   2  -1   0  295.81    3.89
  -1   2   0  304.32    5.51
   1  -2   0  283.93    4.90
   1   2   0  287.73    4.14
  -2  -1   0  298.40    5.91
  -2  -1   1   22.79    1.57
   1   2   1   22.32    1.23
   1   2  -1   22.92    1.38
  -1   2   1   22.34    1.45
  -1   2  -1   23.45    1.56
   1   2   1   23.16    1.54
   2   1   1   22.40    1.15
  -2   1   1   21.47    1.14
   1  -2   1   23.15    1.51
   1  -2  -1   22.58    1.11
  -2   1   2    6.50    0.93
  -2  -1  -2    7.18    0.82
  -2   1   2    6.29    0.83
  -1   2   2    6.63    1.05
  -2  -1   2    6.63    1.14
  -1   2  -2    6.04    1.04
   1   2   2    7.08    1.13
   1   2  -2    6.07    1.07
   1  -2   2    6.75    1.14
   2   1   2    6.57    0.83
   1   2   2    7.30    0.91
   1  -2  -2    6.44    0.69
  -1  -2   3    4.60    0.35
  -2  -1   3    7.01    0.62
   1   2  -3    4.59    1.10
   1   2   3    6.84    1.15
  -1  -2  -3    7.08    0.71
  -1   2   3    5.55    1.09
   2   1   3    5.67    0.87
  -2  -1   3    6.30    1.22
  -2   1   3    5.95    0.87
  -2   1   3    6.18    1.05
  -2  -1  -3    6.71    1.00
  -2   1   4   46.18    2.80
  -1  -2  -4   47.54    2.19
  -1   2   4   44.72    2.83
   1   2   4   43.72    2.73
  -2  -1  -4   47.50    2.55
   2   1   4   44.74    2.45
  -2   1   4   47.59    2.40
  -2  -1   4   44.24    1.73
  -1  -2   4   38.44    1.42
  -2  -1   4   46.38    3.02
   1   2   5 1570.56   21.05
  -1   2   5 1564.31   21.39
   2   1   5 1685.13   20.80
  -2   1   5 1559.03   21.51
  -1  -2  -5 1627.66   19.36
  -1  -2   5 1483.82   16.44
  -2  -1  -5 1576.35   20.25
  -2   1   5 1561.65   19.13
  -2  -1   5 1585.44   21.65
  -2  -1   5 1675.10   17.49
   2   1   6   94.34    4.32
  -2  -1  -6   92.62    4.26
  -2   1   6   93.06    4.72
  -1   2   6  102.87    4.86
  -2   1   6   99.06    3.84
  -1  -2   6   97.62    3.08
   1   2   6   95.13    4.57
  -2   1  -6   97.71    4.76
  -2  -1   6   92.76    3.19
  -1  -2  -6   94.33    3.95
  -1   2   6   98.74    4.12
   1   2   7  355.24    9.17
  -2  -1  -7  368.79    9.32
  -1   2   7  358.65    8.76
  -2   1  -7  372.50   10.18
   1   2   7  355.85    9.79
  -2   1   7  374.55    8.43
  -1   2   7  358.70   10.06
  -1  -2   7  348.98    6.98
  -2  -1   7  357.48    7.30
   1   2  -7  391.95   10.96
  -1   2  -7  371.17   10.36
   2   1   7  369.49    9.69
   2   1   7  378.48    9.65
  -1  -2  -7  377.07    9.11
  -1  -2   8    1.87    0.76
   1   2   8    1.49    1.09
   1   2   8    1.99    1.35
  -1   2   8    1.96    1.10
   1   2  -8    2.25    1.41
  -1   2   8    3.52    1.74
   2   1  -8    2.62    1.46
  -1   2  -8    2.27    1.43
   2   1   8    2.37    1.35
  -2   1   8    2.38    0.93
   2   1   8    2.23    1.28
  -2   1  -8    6.61    1.92
  -1  -2  -8    2.73    1.26
  -2  -1  -8    3.34    1.48
  -2  -1   8    1.54    0.69
  -2  -1  -9  892.38   17.67
   1  -2   9  977.21   16.28
   2   1   9  873.35   17.10
   1   2  -9  882.24   19.51
   1  -2  -9  870.80   18.66
  -2   1   9  884.35   15.55
  -1  -2  -9  915.50   17.49
   1   2   9  866.51   18.32
   1   2   9  875.71   16.90
  -2   1  -9  908.77   18.69
  -1   2  -9  862.47   18.87
  -1   2   9  851.17   18.64
  -2  -1   9  915.46   14.47
  -1  -2   9  888.79   14.07
  -1   2   9  851.45   16.20
   2   1  -9  900.71   20.56
  -2   1 -10   84.72    5.65
   2  -1 -10   82.78    6.09
  -2   1  10   78.85    4.43
   1  -2 -10   86.24    5.77
  -2  -1 -10   81.82    5.26
  -1  -2  10   82.60    4.02
   2   1 -10   81.58    6.18
  -2  -1  10   81.26    4.07
   1   2 -10   84.77    6.12
   1  -2  10   80.65    4.50
   2  -1  10   87.43    5.14
   1   2  10   83.99    4.99
  -1   2 -10   84.70    6.05
  -1   2  10   85.20    4.87
   1   2  10   82.77    5.67
   2   1  10   87.26    5.25
  -1  -2 -10   86.83    5.37
  -1   2  11 1450.43   23.94
  -1  -2  11 1440.73   21.01
  -2  -1  11 1445.83   21.51
  -2   1  11 1441.47   22.91
  -1  -2 -11 1456.92   25.93
   1  -2 -11 1413.21   26.94
   2  -1  11 1474.20   24.44
   2   1  11 1452.14   25.18
   2   1 -11 1428.82   29.04
   1   2  11 1422.69   24.62
  -2   1 -11 1466.71   27.35
  -2  -1 -11 1459.98   26.17
   1  -2  11 1462.89   22.98
  -1   2 -11 1396.57   27.55
   1   2 -11 1390.45   28.33
   2  -1 -11 1495.32   29.07
  -2   1 -12   16.45    2.78
   1   2 -12   15.38    2.91
  -2   1  12   17.23    2.35
   2   1 -12   13.40    2.71
  -2  -1  12   17.71    2.11
  -2  -1 -12   16.81    2.77
   1  -2 -12   18.16    3.04
   2  -1 -12   17.75    3.24
   2  -1  12   19.12    2.61
   2   1  12   18.19    2.76
  -1  -2 -12   16.96    2.74
   1   2  12   17.73    2.71
  -1   2 -12   18.08    3.10
   1  -2  12   18.77    2.48
  -1   2  12   16.49    2.39
  -1  -2  12   19.17    2.24
   1   2  13  954.29   21.03
  -2   1  13  960.27   19.54
  -1   2  13  953.82   20.32
   1   2 -13 1033.16   26.07
  -2  -1 -13  994.48   23.14
   2   1 -13 1019.51   25.94
  -1   2 -13  990.99   24.62
  -2  -1  13  960.98   18.03
   2   1  13  973.10   21.44
  -1  -2 -13 1024.62   22.89
   2  -1  13 1002.19   21.10
   1  -2  13  987.32   19.64
   1  -2 -13  982.72   23.74
  -1  -2  13  957.74   17.85
  -2   1 -13  978.86   23.84
   2  -1 -13 1032.75   25.31
   2   1  14    3.33    1.63
  -1   2  14    2.65    1.13
  -2  -1  14    3.00    1.14
  -2  -1 -14    3.61    1.63
   1  -2  14    2.82    1.34
   1   2  14    2.34    1.20
   2  -1 -14    3.69    2.04
   2  -1  14    4.29    1.68
  -2   1 -14    3.98    2.02
  -1  -2  14    3.28    1.11
   1   2 -14    3.24    1.97
  -1  -2 -14    3.09    1.31
  -1   2 -14    3.07    1.92
   2   1 -14    1.52    1.61
  -2   1  14    3.30    1.11
   1  -2 -14    3.25    1.63
   1  -2  15  191.99    8.68
  -2   1 -15  195.07   11.26
  -1   2 -15  189.31   11.37
   1   2  15  184.85    9.39
  -2   1  15  183.06    8.58
  -1  -2 -15  192.48   10.41
  -2  -1  15  184.80    7.88
   1  -2 -15  197.16   11.14
   2   1 -15  206.68   12.24
   2   1  15  189.66    9.63
   2  -1  15  182.33    9.05
  -2  -1 -15  199.86   10.86
   2  -1 -15  191.35   11.47
   1   2 -15  191.38   11.80
  -1   2  15  185.86    9.00
  -2  -1 -16    1.62    1.80
   1  -2  16    0.37    0.83
   2   1  16    0.28    1.13
   1  -2  16    1.12    0.77
   2   1  16    1.22    0.74
   1   2  16    0.15    1.11
   1  -2 -16   -0.36    1.78
   2  -1 -16    0.71    2.12
   1   2 -16    2.40    1.92
  -2   1  16    1.00    0.85
   1   2  16    1.08    0.80
  -2   1 -16    0.05    1.96
   2  -1  16    1.24    1.63
  -1   2  16    1.27    1.20
  -1  -2  16    1.23    0.82
  -1   2 -16    2.51    2.58
   2   1 -16    0.42    1.81
  -1   2  16    1.01    0.87
  -2  -1  16    1.01    0.78
  -2   1  16    1.61    1.20
  -1  -2 -16    1.96    1.69
   2  -1  16    0.89    0.84
  -1  -2  17  263.88    7.40
  -2   1  17  258.12   10.87
   1  -2  17  261.63    7.31
  -1   2  17  267.47    7.56
   2  -1  17  256.24   11.46
   2  -1  17  267.77    7.15
  -2  -1 -17  260.06   13.60
  -1  -2 -17  280.48   13.81
   1   2 -17  255.53   14.77
   1  -2 -17  273.37   14.25
  -2   1  17  271.09    7.59
  -1   2 -17  262.43   14.67
  -2   1 -17  268.78   14.35
   2  -1 -17  268.88   15.00
   1   2  17  252.82   11.90
   2   1  17  268.22    7.28
   1   2  17  269.54    7.46
  -2  -1  17  269.41    7.43
   2   1  17  262.95   12.14
  -1   2  17  259.06   11.52
   2   1 -17  279.89   15.59
  -2   1 -18    5.69    2.52
   1  -2 -18    5.19    2.56
   1   2  18    6.03    1.32
  -1   2  18    5.25    1.37
   1   2 -18    4.59    2.61
  -2  -1  18    6.69    1.42
   2  -1  18    6.00    2.03
   2   1  18    5.97    1.35
   1  -2  18    6.46    1.33
  -1  -2  18    5.15    1.26
   2  -1  18    6.89    1.29
   2   1  18    6.38    2.26
   2  -1 -18    5.68    2.67
  -1  -2 -18    7.47    2.67
   2   1 -18    6.12    3.22
  -2  -1 -18    5.66    2.51
  -1   2  18    5.15    1.68
  -1   2 -18    6.31    2.93
   1   2  18    6.22    2.28
  -2   1  18    5.52    1.35
  -2  -1  19   36.63    2.82
   2   1  19   29.65    4.20
  -2   1  19   33.56    2.75
   1   2  19   33.32    4.54
   2  -1  19   34.13    2.72
  -1   2  19   34.74    2.92
  -1  -2  19   33.90    2.81
  -1   2 -19   33.96    5.50
  -1   2  19   29.97    4.12
  -2   1 -19   35.25    5.43
   1   2 -19   33.34    5.58
   2   1  19   32.66    2.67
   1   2  19   35.41    2.80
   1  -2  19   33.75    2.71
   2   1 -19   39.90    6.30
   1  -2 -19   34.28    5.52
   2  -1 -19   32.02    5.39
  -1   2  20   49.93    3.47
   2  -1 -20   46.99    6.73
   1   2 -20   50.11    7.10
  -1   2 -20   51.60    7.17
   1   2  20   53.42    3.60
  -2  -1  20   51.22    3.44
   2  -1  20   53.24    3.45
  -2   1 -20   48.57    6.71
   2   1  20   54.04    3.41
   1  -2  20   54.07    3.43
   1   2  20   45.20    5.22
  -1  -2  20   52.86    3.47
  -2   1  20   52.79    3.53
   2   1 -20   49.88    7.00
   2   1  21    6.66    1.54
  -2   1  21    5.90    1.49
   1   2  21    5.91    1.48
  -1  -2  21    5.83    1.60
   1  -2  21    5.72    1.55
  -2  -1  21    4.97    1.50
  -1   2  21    5.68    1.46
   2  -1  21    5.74    1.41
   2  -1  22    1.19    1.17
   2   1  22    0.86    1.05
   1   2  22    0.09    1.08
   1  -2  22   -0.14    1.10
  -2   1  22   -0.26    1.12
  -1  -2  22    0.72    1.11
  -1   2  22   -0.43    1.26
  -2  -1  22   -0.64    1.08
   2  -1  23   18.71    2.15
  -1   2  23   18.83    2.30
   1  -2  23   21.18    2.28
  -2   1  23   18.73    2.22
   1   2  23   18.78    2.19
   2   1  23   19.84    2.17
  -1  -2  23   19.36    2.19
  -2  -1  23   19.35    2.18
   2  -1  24    0.16    1.01
   1  -2  24   -0.14    0.93
  -1   2  24   -0.48    1.14
  -1  -2  24   -0.28    1.01
   2   1  24    0.23    0.98
  -2   1  24    0.04    1.04
   1   2  24    0.81    1.09
  -2  -1  24   -0.56    0.94
  -2   1  25   31.75    2.53
   1   2  25   30.74    2.47
  -1  -2  25   29.91    2.33
   2   1  25   33.25    2.59
  -2  -1  25   31.43    2.41
   2  -1  25   31.54    2.40
  -1   2  25   30.92    2.56
   1  -2  25   32.37    2.34
   2  -1  26    0.50    0.81
   2   1  26    0.11    0.82
   1  -2  26    0.73    0.80
  -1   2  26   -0.23    0.84
  -1  -2  26    0.54    0.85
  -2  -1  26   -0.58    0.80
   1   2  26   -0.68    0.81
  -2   1  26   -0.14    0.78
   2  -1  27   56.92    2.63
   2   1  27   52.08    2.57
  -1   2  27   50.60    2.62
  -2   1  27   50.75    2.55
   1   2  27   51.10    2.58
   1  -2  27   51.26    2.56
  -2  -1  27   51.73    2.59
  -1  -2  27   51.95    2.55
   1  -2  28    0.47    0.51
   1   2  28    0.45    0.51
  -2   1  28   -0.15    0.52
   2  -1  28    0.74    0.54
  -2  -1  28   -0.95    0.57
  -1  -2  28    0.30    0.54
  -1   2  28    0.01    0.52
   2   1  28   -0.22    0.51
  -2   2   0  737.56   11.21
  -2   2   0  707.47    9.27
  -2  -2   1   -0.26    0.88
  -2   2   1    0.06    0.52
   2   2   1    0.23    0.66
  -2   2  -1    0.27    0.71
  -2   2   2   12.39    1.36
  -2  -2   2   13.36    1.82
   2   2   2   12.70    1.38
  -2  -2  -2   16.44    0.94
  -2  -2   3    0.29    1.23
  -2   2   3    0.63    0.98
   2   2   3    0.19    0.87
  -2  -2  -3    0.40    0.55
  -2  -2   4 3819.86   42.64
  -2  -2  -4 3995.27   37.54
  -2  -2   4 3945.15   34.11
  -2   2   4 3800.22   40.65
   2   2   4 3701.57   39.68
  -2   2   5    0.48    1.23
  -2   2   5   -0.24    0.74
  -2  -2   5    0.69    1.36
  -2  -2  -5    0.62    0.69
   2   2   5    0.95    1.09
  -2  -2   5    0.09    0.33
  -2  -2   6  470.64    7.01
  -2   2   6  441.71    9.46
  -2  -2   6  442.49   11.39
  -2   2   6  432.92   10.58
   2   2   6  422.66   10.02
  -2  -2  -6  449.78    9.26
  -2  -2  -7    0.42    0.86
  -2   2  -7   -0.04    1.18
  -2  -2   7    0.19    0.48
   2   2   7    0.70    1.17
  -2   2   7    0.97    1.46
   2   2   7    0.70    1.19
   2   2  -7    0.37    1.26
  -2   2   7    0.23    0.78
   2   2   8   42.16    3.38
  -2   2   8   41.60    3.77
  -2   2   8   39.84    2.99
  -2  -2   8   43.28    2.35
   2   2   8   45.52    3.68
  -2  -2  -8   44.04    3.27
  -2   2  -8   51.79    4.11
   2   2   9    1.46    1.60
   2   2   9    1.05    1.54
  -2  -2  -9    0.27    1.00
  -2   2   9    0.52    1.11
  -2  -2   9    0.39    0.70
  -2   2  -9   -0.88    1.63
   2   2  -9    0.64    1.74
  -2   2  10  293.97    9.13
  -2  -2  10  308.09    7.61
  -2  -2 -10  308.35   10.05
   2   2  10  293.18   10.79
   2   2 -10  305.51   12.05
   2  -2  10  317.11    9.71
   2   2  10  303.07   10.16
  -2   2 -10  309.64   11.33
  -2   2  11    1.11    1.20
   2  -2  11    1.84    1.42
   2   2 -11   -0.64    1.96
   2   2  11    1.64    1.61
  -2  -2  11    1.23    0.95
   2  -2 -11    0.03    1.58
  -2  -2 -11   -0.24    1.30
  -2   2 -11   -0.56    1.83
  -2  -2  12  185.50    6.52
  -2   2 -12  178.10    9.56
   2   2  12  178.90    8.52
  -2  -2 -12  183.49    8.67
   2  -2 -12  184.86    9.83
   2  -2  12  182.43    7.98
   2   2 -12  183.53   10.20
  -2   2  12  174.81    7.78
   2  -2 -13    0.97    1.80
   2   2  13    1.48    1.93
  -2  -2 -13   -0.01    1.28
   2   2 -13    0.86    1.87
  -2   2 -13    1.05    1.58
  -2   2  13    0.25    1.00
  -2  -2  13   -0.13    0.71
   2  -2  13    0.89    1.22
   2  -2 -14  100.42    7.81
   2  -2  14   95.14    6.18
  -2   2 -14  101.35    8.11
  -2  -2 -14  105.06    7.31
   2   2  14  101.66    6.88
   2   2 -14   95.64    8.16
  -2   2  14   97.80    6.22
  -2   2 -15    0.52    2.00
  -2   2  15   -0.45    1.10
   2   2 -15   -0.69    2.16
  -2  -2 -15    0.62    1.29
   2  -2  15    0.22    1.31
   2  -2 -15   -1.10    1.87
   2   2  15   -0.26    1.54
  -2  -2  16   54.36    3.15
   2   2  16   52.20    3.05
   2   2  16   52.25    5.33
   2   2 -16   54.10    6.52
  -2   2 -16   58.68    6.68
  -2   2  16   52.85    3.20
  -2   2  16   53.84    4.96
  -2  -2 -16   57.04    5.86
   2  -2  16   56.29    5.08
   2  -2 -16   58.30    6.68
   2  -2  16   55.21    3.11
  -2   2 -17   -0.67    1.77
  -2   2  17    0.14    1.10
   2   2 -17    0.31    1.90
   2   2  17    0.31    0.74
  -2  -2 -17    2.61    2.37
   2  -2  17    0.65    0.73
  -2  -2  17    0.25    0.93
  -2   2  17   -0.22    0.88
   2  -2 -17   -1.04    2.11
   2   2  17   -1.00    1.77
   2  -2  17    0.07    1.02
  -2   2 -18  660.16   24.16
   2   2  18  654.19   20.58
   2   2 -18  665.65   25.35
  -2   2  18  634.72   18.57
   2  -2 -18  660.47   24.26
   2   2  18  673.66   12.66
  -2   2  18  682.95   13.15
   2  -2  18  682.20   12.53
  -2  -2  18  661.05   12.72
   2   2 -19    1.73    2.36
  -2  -2  19   -0.21    0.95
   2   2  19    0.73    0.91
   2   2  19    0.39    1.47
  -2   2  19    0.47    1.12
  -2   2 -19   -1.08    2.12
   2  -2  19    1.12    1.03
   2  -2 -19    1.33    1.59
  -2  -2  20  375.11    9.33
   2  -2  20  382.44    9.14
   2   2  20  345.39   15.03
  -2   2  20  370.32    9.71
   2   2  20  382.50    9.45
  -2   2  21   -0.37    1.09
  -2  -2  21    0.18    1.03
   2  -2  21    0.15    0.94
   2   2  21    0.26    1.10
  -2  -2  22  333.94    8.91
  -2   2  22  347.47    9.37
   2  -2  22  351.12    8.78
   2   2  22  344.85    8.96
  -2  -2  23    1.01    0.96
   2  -2  23    1.75    1.20
   2   2  23   -0.54    1.21
  -2   2  23    1.34    1.14
  -2  -2  24   84.10    4.04
   2   2  24   83.76    4.18
  -2   2  24   88.96    4.33
   2  -2  24   90.21    4.06
   2   2  25   -0.40    0.81
  -2   2  25    0.17    0.91
   2  -2  25    0.87    0.93
  -2  -2  25   -0.01    0.82
  -2   2  26   65.52    3.23
   2  -2  26   69.42    3.14
  -2  -2  26   68.37    3.19
   2   2  26   67.35    3.28
   2  -2  27    0.50    0.61
   2   2  27   -0.03    0.60
  -2   2  27    0.44    0.75
  -2  -2  27    0.10    0.61
   2   2  28   24.15    1.52
   2  -2  28   23.39    1.43
  -2  -2  28   21.43    1.37
   0  -3   0    0.96    0.95
   0   3   0    0.59    0.87
   0   3   0    0.04    0.51
  -3   0   0    0.37    0.66
   0   3   0    0.38    0.47
   0   3  -1  244.48    5.27
  -3   0   1  236.95    4.99
   0  -3   1  232.89    6.29
   0   3   1  232.47    6.04
  -3   0  -1  248.77    6.06
   0   3   1  246.97    5.02
   0  -3  -1  226.53    5.73
   0  -3   2    1.41    1.13
  -3   0  -2    0.23    0.25
   3   0   2    0.25    0.33
   0  -3  -2    0.36    0.85
   0   3   2    0.53    0.62
  -3   0  -2    0.40    0.84
   0   3  -2    0.08    0.80
  -3   0   2   -0.01    0.75
   0   3   2    0.33    0.98
   3   0   3 1368.96   15.52
  -3   0   3 1407.39   17.16
  -3   0  -3 1466.26   18.79
   0   3  -3 1452.58   19.22
   0   3   3 1360.84   19.06
  -3   0  -4   -0.35    0.97
  -3   0   4   -0.02    0.81
   0   3  -4   -1.70    1.59
   0   3   4    0.03    1.02
   0   3   5  430.99    9.98
  -3   0  -5  446.43    9.96
  -3   0   5  432.25    7.87
  -3   0  -6   -0.07    0.97
   0   3  -6    2.03    1.60
  -3   0   6    0.16    0.56
   0   3   6   -0.12    1.14
  -3   0   7  162.84    5.13
   0  -3  -7  161.34    5.99
   0   3   7  161.42    6.05
   0   3   7  158.93    6.63
   0   3  -7  166.30    7.21
  -3   0  -7  169.56    6.68
   0  -3  -8    0.23    0.82
  -3   0  -8    0.13    1.06
   0   3   8    0.21    1.24
  -3   0   8    0.79    0.81
   0   3   8   -0.43    1.00
   0  -3   8   -0.21    0.65
   0   3  -8   -0.74    1.59
   0  -3  -9  558.38   13.24
  -3   0  -9  572.00   14.31
   0   3   9  563.42   13.20
  -3   0   9  564.50   11.45
   0   3   9  557.02   14.68
   0   3  -9  599.94   15.94
  -3   0 -10   -1.02    1.55
   3   0  10   -0.03    1.52
   0   3  10    0.23    1.35
   0   3 -10   -1.97    2.44
   0  -3 -10   -0.27    1.17
   0   3  10   -0.32    1.62
   0  -3  10   -0.10    0.63
  -3   0  10   -0.21    0.89
   3   0 -11  582.95   18.62
   0  -3 -11  586.87   15.36
   3   0  11  563.54   15.05
   0   3  11  582.87   14.72
   0   3  11  594.47   17.03
  -3   0 -11  592.34   16.24
   0  -3  11  605.73   12.52
   0   3 -11  571.49   17.48
  -3   0  11  585.41   12.86
   0   3  12    0.46    1.21
   3   0  12    0.49    1.30
   0  -3 -12    0.36    1.06
  -3   0 -12    0.11    1.33
   0   3 -12   -1.15    1.98
  -3   0  12   -0.19    0.83
   3   0 -12   -0.68    2.03
   0  -3  12   -0.04    0.72
   0   3 -13  679.96   20.82
  -3   0 -13  688.79   19.45
   3   0  13  666.64   17.82
   0  -3 -13  705.94   18.95
  -3   0  13  684.05   15.24
   0  -3  13  732.17   15.21
   3   0 -13  664.39   21.40
   0   3  13  666.01   17.29
   0  -3  14   -1.12    1.13
   3   0 -14    2.12    2.17
   0  -3 -14   -0.13    1.13
  -3   0  14   -0.19    0.74
  -3   0 -14   -1.53    1.93
   0   3  14   -0.41    1.30
   0   3 -14    0.39    1.85
   3   0  14    0.02    1.27
   0   3 -15  338.05   15.79
   3   0 -15  342.27   16.09
   0  -3 -15  343.93   14.06
   0  -3  15  345.59    8.05
  -3   0 -15  336.95   14.58
  -3   0  15  339.77   11.06
   3   0  15  334.82   13.26
   0   3  15  337.34    7.99
   0   3  15  324.55   12.74
   0   3  16   -1.22    1.47
   0   3 -16   -2.77    2.35
   3   0  16    0.15    0.80
   0   3  16   -0.44    0.62
  -3   0 -16   -1.09    2.24
   0   3  16   -0.19    0.75
  -3   0  16    0.23    0.67
   3   0 -16   -0.93    1.86
   3   0  16   -0.25    1.35
   0  -3  16    0.31    0.86
   0  -3 -16   -0.26    1.44
   0   3  17   33.70    2.11
   3   0  17   30.77    4.31
   0   3 -17   37.84    5.78
  -3   0 -17   29.97    4.86
   0   3  17   32.40    4.32
   3   0 -17   43.59    6.72
   0  -3  17   34.98    2.69
   3   0  17   35.00    2.50
  -3   0  17   34.71    2.63
   0  -3 -17   33.18    4.75
   0   3  17   36.69    2.83
   3   0  18    1.89    1.68
   3   0 -18   -2.06    2.49
  -3   0  18    0.23    0.89
   0  -3  18   -0.16    0.95
   3   0  18    0.54    0.84
   0   3 -18   -1.03    2.44
  -3   0 -18   -0.53    2.17
   0   3  18    0.79    0.78
   0   3  18   -0.53    1.24
   0   3  18    1.06    1.00
  -3   0 -19   12.05    3.75
   3   0  19   16.21    2.07
   0  -3  19   14.02    2.04
   3   0 -19   18.34    4.71
   0   3  19   11.66    3.01
   0   3  19   15.58    2.11
   0   3  19   14.74    1.59
  -3   0  19   16.00    2.12
   3   0  19   11.78    3.04
   0   3 -19   16.04    4.30
   0   3  20    1.26    1.03
  -3   0  20   -0.16    1.16
   3   0  20    0.18    0.93
   0  -3  20   -1.07    1.07
   0   3  21   -0.30    1.06
  -3   0  21    0.80    1.02
   3   0  21    0.85    0.92
   0  -3  21    1.45    1.06
   0   3  22    0.66    1.15
   0  -3  22    0.55    1.18
   3   0  22    0.23    0.91
  -3   0  22    0.59    1.01
   0  -3  23    2.28    1.09
   3   0  23    1.94    1.11
   0   3  23    1.01    1.12
  -3   0  23    2.01    1.12
   0  -3  24   -0.34    0.98
   0   3  24    0.58    1.09
  -3   0  24   -0.59    0.96
   3   0  24    0.86    0.83
  -3   0  25   48.75    2.95
   0  -3  25   49.84    2.92
   0   3  25   48.06    3.14
   3   0  25   47.75    2.88
   3   0  26    0.84    0.81
  -3   0  26   -0.54    0.80
   0   3  26   -0.47    0.86
   0  -3  26    0.60    0.75
   0  -3  27   69.24    2.89
   3   0  27   70.28    2.85
   0   3  27   65.49    2.97
  -3   0  27   65.66    2.80
   3   0  28   -0.62    0.48
   0  -3  28    0.17    0.51
   1  -3   0  980.42   13.31
   3  -1   0 1010.66    9.96
   1   3   0 1043.61   11.46
  -1   3   0  969.79   13.10
  -3  -1   0  967.35   13.97
   1   3   0 1043.10   11.07
  -1   3   0 1026.91   14.06
  -1  -3   0 1024.52   15.06
  -3   1   0 1021.38   10.07
   3   1   1   62.45    2.06
  -3   1   1   58.79    1.75
  -1   3  -1   65.18    2.93
  -1  -3  -1   60.66    3.23
   1  -3  -1   58.27    2.47
   1   3  -1   64.68    2.45
   1   3   1   58.32    3.02
  -3  -1   1   57.04    2.86
  -3   1   1   58.37    2.08
   1   3  -1   62.11    1.66
  -1   3   1   59.08    2.87
  -1   3   1   62.52    2.51
   1   3   1   60.67    2.31
   1  -3   1   59.17    2.93
   3   1   2   17.91    1.22
  -3  -1  -2   16.54    1.59
   1   3   2   16.74    1.46
  -3   1   2   15.68    1.39
  -1  -3  -2   16.07    1.93
  -3   1  -2   16.07    0.73
  -1   3   2   15.55    1.78
   1  -3  -2   16.71    1.44
  -3  -1   2   17.02    1.74
   1  -3   2   17.15    1.83
   1   3   2   16.27    1.81
  -3   1   2   14.68    0.86
   1   3  -2   16.77    1.58
  -1   3  -2   18.82    1.87
   1  -3  -3  442.82    7.66
   3   1   3  459.35    7.39
  -3   1   3  447.18    8.58
   1  -3   3  490.15   10.23
  -1   3   3  439.85    9.26
  -3  -1  -3  449.17    8.36
   1   3   3  459.51    8.46
  -1   3  -3  481.40    9.84
  -1  -3  -3  428.69    5.34
   1   3  -3  468.04    9.38
   1   3   3  446.29    9.30
  -3  -1   3  451.24    9.22
  -1  -3   4  211.75    3.22
  -3  -1  -4  220.53    5.98
  -3   1   4  223.02    5.55
   1   3   4  216.76    6.57
  -1   3   4  218.97    6.54
   1   3  -4  219.01    6.85
  -1  -3  -4  232.73    4.45
  -1   3   5   53.33    3.46
  -3  -1   5   55.87    3.49
   3   1   5   52.05    2.92
  -1  -3  -5   52.51    2.44
  -3   1   5   55.15    2.81
  -3  -1  -5   53.13    3.16
   1   3  -5   58.12    3.68
  -1  -3   5   51.69    1.70
  -3   1  -5   57.35    3.59
   1   3   5   50.48    3.36
  -3  -1   5   52.80    2.23
  -3   1  -6  202.86    7.34
   1   3   6  195.06    7.00
  -1  -3   6  220.51    8.11
   1   3  -6  207.17    7.57
  -3  -1   6  199.98    6.95
   3   1   6  199.98    6.37
  -3  -1   6  196.28    4.80
  -3  -1  -6  203.94    6.56
  -3   1   6  199.53    5.69
  -1   3   6  199.27    6.35
  -1   3  -6  209.41    7.59
  -1  -3  -6  201.97    5.59
  -1  -3   6  192.44    4.08
  -1   3   6  203.64    7.21
   1   3   7   49.88    3.76
  -1  -3  -7   51.75    3.13
  -1  -3   7   45.89    2.17
  -1   3   7   52.75    3.97
  -1   3  -7   49.20    3.97
   1   3   7   52.49    3.51
   3   1   7   48.86    3.45
  -3   1   7   49.75    3.02
  -1   3   7   50.47    3.47
   1   3  -7   52.62    4.22
  -3  -1   7   53.15    2.62
  -3   1  -7   53.36    3.93
  -3  -1  -7   48.11    3.42
   1   3   8  384.78   11.26
  -3   1  -8  382.95   11.39
   3   1   8  374.92   10.55
  -3  -1   8  388.27    8.06
  -3  -1  -8  381.64   10.56
   1   3   8  386.59   10.40
  -1   3   8  380.70    9.97
  -1  -3   8  365.61    7.31
  -1   3   8  392.21   11.54
  -1   3  -8  376.55   11.71
   3   1   8  381.05   10.85
   1   3  -8  389.90   12.13
  -3   1   8  369.02    9.06
  -1  -3  -8  401.81    9.94
  -1   3   9  144.88    6.30
  -3   1  -9  152.12    7.50
  -1  -3  -9  147.97    6.32
  -1  -3   9  143.38    4.68
  -3  -1  -9  146.58    6.81
   1   3   9  141.65    6.56
   1   3  -9  148.75    7.78
  -3   1   9  146.67    5.84
   1   3   9  144.36    7.17
  -1   3  -9  145.11    7.55
   3   1   9  148.04    6.88
  -1   3   9  145.77    7.48
   1  -3  -9  135.54    6.85
  -3  -1   9  146.39    5.13
  -1   3 -10  158.02    8.39
  -3  -1  10  150.84    5.53
  -1   3  10  164.63    7.11
  -3  -1 -10  155.41    7.42
   1   3  10  159.49    8.07
  -1  -3  10  162.16    5.36
  -1  -3 -10  166.94    7.29
  -3   1 -10  152.45    7.89
   1  -3 -10  166.15    7.91
   1   3 -10  162.76    8.80
   1  -3  10  153.97    6.24
   3   1  10  144.33    7.22
  -3   1  10  151.38    6.27
   3   1 -10  144.92    8.78
  -1   3  10  164.35    8.25
   1   3  10  160.31    7.28
  -3   1  11    4.45    1.40
  -1  -3  11    4.57    1.15
   1   3 -11    5.47    2.79
  -1   3  11    5.42    2.19
  -3  -1 -11    4.68    1.92
   3  -1  11    4.53    1.75
  -1   3  11    5.24    1.72
   1  -3 -11    4.46    1.80
  -1   3 -11    5.15    2.26
   3   1 -11    5.20    2.16
  -3   1 -11    4.20    2.21
   1   3  11    6.25    2.51
   1  -3  11    5.62    1.54
  -3  -1  11    4.62    1.20
   3   1  11    4.61    1.98
  -1  -3 -11    5.54    1.75
   1   3  11    5.63    1.94
   3   1 -12    4.43    2.21
   1   3  12    1.90    1.47
   1   3 -12    2.83    1.91
  -1  -3  12    3.23    1.07
   3  -1  12    3.91    1.63
  -1   3 -12    2.76    1.96
  -3  -1  12    2.94    1.19
   3  -1 -12    3.75    2.34
   1  -3 -12    3.55    1.66
   1  -3  12    3.51    1.35
   3   1  12    2.67    1.59
  -1  -3 -12    1.84    1.30
  -3   1  12    3.03    1.25
  -1   3  12    2.49    1.28
  -3   1 -12    3.44    1.60
  -3  -1 -12    4.15    1.87
   1   3  13    1.90    1.41
  -3   1  13    2.57    1.13
  -1   3  13    2.80    1.42
  -3   1 -13    6.25    2.46
   3  -1  13    4.12    1.75
   3  -1 -13    1.78    1.94
   1   3 -13    2.47    2.06
  -1  -3 -13    3.66    1.53
   3   1 -13    3.55    2.33
   1  -3 -13    2.82    1.70
  -3  -1 -13    3.40    1.83
   3   1  13    2.98    1.84
  -3  -1  13    3.10    1.13
   1  -3  13    2.71    1.26
  -1   3 -13    3.83    2.31
  -3  -1 -14    9.15    2.40
  -1   3  14    9.37    2.12
   3  -1 -14    7.76    2.51
  -1   3 -14    8.66    2.64
   1  -3 -14   12.09    2.97
  -3   1 -14    9.27    2.53
   1   3  14    9.18    2.24
   3  -1  14    9.20    2.26
  -3   1  14    8.21    1.82
   3   1 -14    8.65    2.84
   1   3 -14    9.96    3.17
   1  -3  14    8.73    1.93
  -3  -1  14    8.14    1.67
  -1  -3 -14   10.66    2.41
   3   1  14   10.94    2.52
   3  -1  15    3.36    1.57
   1   3 -15    9.65    3.86
   1   3  15    3.79    1.03
   1   3  15    4.09    1.88
   3   1  15    2.07    1.50
  -1  -3  15    3.62    1.06
   1  -3 -15    2.06    1.46
   3  -1 -15    3.27    2.09
   1  -3  15    3.21    1.24
  -1  -3 -15    4.52    1.79
  -3  -1 -15    4.12    2.03
  -3   1  15    2.40    1.16
  -1   3 -15    3.63    1.73
  -1   3  15    3.58    1.60
  -1   3  15    3.82    1.01
   3   1 -15    4.31    2.40
   1  -3  15    3.29    0.97
   3  -1 -16  141.26   10.72
   3   1  16  144.63    5.02
   1  -3 -16  149.20   10.00
   3  -1  16  147.52    4.97
   1   3  16  146.15    8.85
   3   1  16  138.07    8.88
   3   1 -16  152.26   11.39
  -3  -1 -16  150.89    9.82
  -1  -3  16  138.84    5.19
  -1  -3 -16  147.65    9.31
   3  -1  16  141.13    8.53
  -3   1  16  143.11    5.16
  -3   1 -16  153.32   10.35
  -1   3  16  141.64    5.25
  -3  -1  16  143.61    5.14
  -1   3  16  131.11    4.12
   1  -3  16  147.03    5.25
   1   3  16  145.85    5.25
  -3   1  16  136.85    7.49
   1   3  16  130.15    4.11
  -1   3  16  137.08    8.32
   1   3 -16  154.96   11.03
  -1   3 -16  146.48   10.66
   1   3 -17   32.58    5.48
  -3  -1  17   31.17    2.45
  -1   3  17   27.21    3.83
   1   3  17   30.12    2.53
   1  -3  17   33.35    2.53
  -1   3  17   29.94    2.57
  -1  -3  17   32.24    2.54
  -3   1  17   30.66    2.50
  -3   1 -17   31.08    4.99
   3  -1 -17   32.85    6.09
   1   3  17   27.18    3.95
   3  -1  17   32.63    4.28
   3  -1  17   32.17    2.45
   3   1 -17   34.97    5.82
   1   3  17   28.80    1.98
  -3  -1 -17   34.41    4.91
  -1   3  17   26.83    1.88
   1  -3 -17   29.87    4.58
  -1   3 -17   33.59    5.45
   3   1  17   29.79    4.19
   3   1  17   30.44    2.41
  -1   3  18  331.18   13.76
  -3  -1  18  338.99    8.69
  -1   3  18  353.86    9.10
   1   3  18  329.06    6.98
   3  -1  18  347.55    8.36
   3   1  18  338.57    8.49
   3   1  18  325.90   14.41
   1   3  18  348.58   14.70
  -1   3  18  323.53    6.99
   3  -1  18  331.35   13.91
   3  -1 -18  351.15   18.06
  -3  -1 -18  337.90   15.85
   3   1 -18  349.39   18.52
   1   3  18  350.34    8.88
   1   3 -18  331.48   17.75
  -3   1  18  350.69    8.87
   1  -3  18  354.99    8.75
  -3   1 -18  338.28   16.61
  -1   3 -18  338.36   17.39
  -1  -3  18  348.30    8.78
  -1   3  19    9.77    2.30
   3  -1 -19   12.28    4.17
   3   1  19    8.73    2.53
   1  -3  19   10.83    1.62
  -3   1 -19    9.52    3.08
   3   1  19    9.56    1.59
  -3  -1  19   10.96    1.66
  -1  -3  19   10.72    1.73
   3  -1  19   12.20    1.70
  -1   3  19   12.00    1.80
   1   3  19   10.59    1.31
  -1   3 -19   14.02    3.95
   3   1 -19   15.56    4.25
  -3   1  19   10.55    1.82
   1   3 -19    8.92    3.10
   1   3  19   11.47    1.71
   1   3  19    8.95    2.59
  -1   3  19    8.98    1.30
  -3  -1  20  174.11    6.22
  -3   1  20  166.36    6.23
  -1   3  20  178.85    6.58
  -1  -3  20  169.63    6.07
   3   1  20  168.31    5.99
   3  -1  20  167.56    5.98
   1   3  20  175.38    6.39
   1  -3  20  172.22    6.02
   1   3  21    2.39    1.23
   1  -3  21    1.91    1.14
  -1  -3  21    1.88    1.31
  -3   1  21    1.53    0.95
   3   1  21    2.27    1.13
  -3  -1  21    2.20    1.12
   3  -1  21    2.45    1.06
  -1   3  21    2.80    1.32
   3   1  22  132.48    5.32
   1  -3  22  128.27    5.24
  -3   1  22  132.07    5.45
   1   3  22  135.07    5.74
  -1  -3  22  129.05    5.29
   3  -1  22  132.10    5.21
  -3  -1  22  130.68    5.32
  -1   3  22  128.04    5.73
   3  -1  23    2.13    1.10
  -3   1  23    1.91    1.16
  -1   3  23    2.03    1.20
   1  -3  23    3.30    1.25
   3   1  23    1.92    1.09
  -3  -1  23    0.64    0.88
   1   3  23    1.57    1.08
  -1  -3  23    3.65    1.30
   3  -1  24   83.54    3.84
  -3   1  24   76.23    3.97
  -1  -3  24   82.81    3.94
  -1   3  24   82.31    4.22
   1   3  24   81.67    4.25
   1  -3  24   81.60    3.89
  -3  -1  24   77.34    3.88
   3   1  24   79.13    3.90
   1   3  25    1.28    0.94
   1  -3  25    2.12    1.03
   3   1  25    2.09    0.96
  -1  -3  25    2.46    0.93
  -3  -1  25    1.35    0.90
   3  -1  25    1.82    0.91
  -3   1  25    1.93    1.04
  -1   3  25    1.44    0.90
  -3  -1  26   54.64    2.88
   1   3  26   56.89    3.03
   3  -1  26   56.52    2.81
   1  -3  26   58.63    2.84
  -3   1  26   53.74    2.88
  -1   3  26   55.46    3.05
   3   1  26   54.73    2.84
  -1  -3  26   56.14    2.83
  -1  -3  27   -0.77    0.64
  -3   1  27    0.56    0.57
   1  -3  27   -0.47    0.68
   3   1  27    1.46    0.73
  -1   3  27    0.07    0.63
   1   3  27   -0.38    0.68
  -3  -1  27   -0.56    0.63
   3  -1  27   -0.14    0.60
   1  -3  28   17.67    1.26
   3  -1  28   15.67    1.11
   3   1  28   15.57    1.14
  -1  -3  28   16.00    1.21
  -2   3   0 1087.47   14.48
  -3  -2   0 1007.64   16.19
  -3   2   0 1077.76   12.31
   2   3   0 1148.25   12.66
   2  -3   0 1034.76   13.41
  -2   3   0 1148.23   16.01
  -3   2  -1  221.48    4.04
  -3   2   1  210.56    4.58
   2   3   1  219.40    6.13
  -2   3  -1  217.63    5.52
  -2   3   1  219.03    5.56
  -2   3  -1  226.61    6.37
  -3  -2   1  211.64    6.48
   2   3  -1  204.70    3.40
   2  -3  -1  211.39    4.26
   3   2   1  217.57    5.32
   2  -3   1  202.99    5.33
   2   3   1  233.15    4.96
  -3   2   2    3.63    1.05
   2  -3  -2    3.21    0.62
   3   2   2    3.19    0.93
  -2   3  -2    5.08    1.59
  -2   3   2    2.82    1.05
  -3  -2   2    4.54    1.88
   2   3   2    3.75    1.00
  -3  -2  -3  323.81    6.27
  -3   2   3  332.80    7.38
   2  -3  -3  324.83    5.49
   2   3   3  330.78    7.37
   3   2   3  320.03    7.08
   2   3   3  332.57    7.98
  -3  -2   3  333.82    8.97
  -2   3   3  333.35    7.76
  -2  -3  -4  177.01    3.65
  -3   2   4  184.63    5.49
   2   3  -4  187.00    6.71
  -2   3   4  179.26    6.05
  -3  -2  -4  178.92    4.82
  -3  -2   4  188.08    6.78
  -3   2   4  183.06    5.83
   3   2   4  191.34    5.50
   2   3   4  183.47    5.78
   2   3   4  187.49    6.12
  -3   2   5 1406.81   20.69
  -2   3   5 1428.50   21.22
   2   3   5 1415.99   20.71
  -2  -3  -5 1420.74   16.60
  -3   2   5 1437.41   19.06
   2   3   5 1455.06   20.23
  -2  -3   5 1413.71   23.18
  -3  -2   5 1434.57   22.37
   3   2   5 1440.29   19.63
  -3  -2  -5 1416.45   18.46
   2   3  -5 1456.92   22.79
  -2  -3   6   15.28    2.59
  -3  -2   6   14.04    2.23
  -3  -2  -6   14.89    1.78
  -3   2   6   15.80    2.21
  -3   2  -6   14.96    2.44
   2   3   6   14.49    2.03
   3   2   6   15.03    1.89
  -2   3   6   14.19    2.17
   2   3   6   15.16    1.93
  -2   3  -6   15.28    2.29
   3   2   6   15.36    2.16
  -2   3   6   15.09    1.90
  -2  -3   6   13.88    0.81
  -3   2   6   15.96    1.87
   2   3  -6   15.49    2.41
  -2  -3  -6   15.56    1.49
  -2  -3  -7  820.33   13.60
  -3   2   7  813.33   16.64
  -3   2  -7  834.69   17.34
  -2   3   7  817.36   16.68
  -2  -3   7  838.42   17.94
   3   2   7  827.46   16.25
   3   2   7  859.07   15.87
  -3  -2   7  817.17   17.13
   2   3   7  804.22   16.08
  -2   3  -7  845.85   17.74
  -2  -3   7  811.45   10.04
  -3  -2   7  836.03   10.99
   2   3  -7  847.16   18.17
  -3  -2  -7  798.49   14.55
  -2   3   7  790.32   14.85
  -3   2   7  787.38   14.16
   2   3   7  811.93   15.68
  -3  -2   8    5.83    0.94
  -2  -3   8    6.37    0.85
  -3   2   8    6.85    1.44
  -3  -2  -8    6.72    1.48
  -3   2  -8    6.34    1.99
  -2   3  -8    5.84    1.91
  -2   3   8    5.54    1.51
   3   2   8    6.96    1.81
  -2   3   8    5.39    1.69
   2   3   8    7.20    1.93
  -2  -3  -8    5.39    1.18
   2   3  -8    6.57    2.13
   2   3   8    7.94    1.82
   3   2   8    6.15    1.62
   3   2   9  262.63    9.35
  -2  -3   9  270.91    6.02
  -3   2  -9  277.16   10.49
  -2   3   9  264.83    8.64
   2   3   9  260.11    9.25
  -2  -3  -9  275.65    8.59
   3   2   9  261.19    9.42
   2   3  -9  267.81   11.04
   2   3   9  262.65    9.79
  -2   3  -9  270.08   10.61
  -2   3   9  263.12   10.03
  -3   2   9  255.65    8.35
   3   2  -9  270.02   11.59
  -3  -2   9  280.24    6.47
  -3  -2  -9  298.23    9.58
  -3  -2  10    0.84    0.57
  -3   2  10    1.31    0.95
   3   2  10    1.71    1.65
  -2  -3 -10    2.02    1.27
   2   3  10    1.72    1.41
   3   2  10    0.92    1.46
  -2   3  10    1.68    1.17
  -2   3 -10    3.01    2.21
   3   2 -10    2.28    2.23
  -3  -2 -10    1.18    1.41
   2   3 -10    5.45    2.44
  -3   2 -10    2.93    2.29
   2   3  10    1.34    1.46
  -2   3  10    0.33    1.49
  -2  -3  10    0.93    0.53
  -3  -2  11  930.77   14.81
   2   3  11  904.94   19.86
  -2  -3  11  941.21   14.42
   2   3  11  895.84   21.20
   2  -3  11  928.92   18.46
   2  -3 -11  882.94   21.82
  -3   2 -11  887.28   21.81
  -2   3  11  895.92   18.63
   3   2 -11  937.76   24.09
  -3  -2 -11  915.50   19.69
  -2   3 -11  926.30   22.62
   2   3 -11  917.28   23.26
   3   2  11  884.00   20.15
  -3   2  11  870.33   17.83
  -2  -3 -11  937.33   19.10
  -3  -2  12   12.73    1.65
   2   3 -12   14.78    3.44
  -2  -3 -12   13.09    2.35
  -3  -2 -12   13.33    2.58
  -3   2 -12   12.50    2.92
   3   2 -12   11.65    2.81
  -2   3  12   10.56    2.09
   2  -3  12   12.69    2.14
   3  -2  12   13.00    2.50
   3  -2 -12   12.85    3.18
  -3   2  12   11.90    2.12
   2   3  12   12.36    2.45
   2  -3 -12   13.33    2.86
  -2   3 -12   12.92    3.02
   3   2  12   12.53    2.50
  -3   2  13  551.54   14.70
   3  -2  13  544.70   15.59
  -3   2 -13  535.70   18.05
  -2   3  13  566.09   15.48
   3  -2 -13  565.15   19.34
  -2  -3 -13  600.39   16.60
   2   3  13  571.66   16.62
   2   3 -13  613.49   20.52
   2  -3  13  550.40   14.67
   2  -3 -13  591.29   18.50
   3   2  13  547.05   16.47
  -2   3 -13  554.53   18.63
   3   2 -13  552.24   19.65
  -3  -2 -13  588.07   16.92
  -3  -2 -14   28.22    3.80
   3   2 -14   26.94    4.58
  -2  -3 -14   22.42    3.22
   2   3  14   27.76    3.76
  -3   2  14   22.83    3.02
   3   2  14   25.51    3.67
   3  -2 -14   20.97    3.91
   2  -3  14   22.12    2.96
  -2   3 -14   23.71    3.84
  -2   3  14   20.86    3.09
  -3   2 -14   24.76    3.97
   3  -2  14   25.95    3.46
   2   3 -14   25.85    4.44
   2  -3 -14   20.47    3.69
   3   2 -15  133.10   10.37
  -3   2  15  123.46    7.15
   3   2  15  120.87    4.39
   2   3  15  129.26    4.64
   3  -2  15  127.06    4.50
   2  -3 -15  122.64    9.13
  -2   3 -15  128.69    9.69
   2   3 -15  143.62   10.97
   2   3  15  121.26    8.08
  -2  -3 -15  132.71    8.34
  -3   2 -15  133.98    9.57
  -2  -3  15  124.29    4.76
   3   2  15  122.93    8.19
   3  -2 -15  125.59    9.64
   3  -2  15  120.26    7.64
  -2   3  15  129.35    4.87
  -2   3  15  121.66    7.48
   2  -3  15  125.31    7.24
   2  -3  15  130.82    4.72
  -3  -2 -15  132.22    8.61
  -2   3 -16    3.11    2.03
   2  -3  16    2.23    1.40
   3   2  16    1.10    1.47
   3  -2  16    0.94    1.31
   3  -2 -16    1.45    2.22
  -2   3  16    1.13    0.68
  -3  -2  16    1.07    0.86
  -2  -3  16    1.56    1.08
   3   2 -16    1.93    2.50
   2  -3  16    0.89    0.85
  -3   2  16    1.10    1.11
   3   2  16    0.74    0.70
  -2   3  16    1.12    0.85
  -3   2 -16    1.91    1.98
   2  -3 -16    2.60    1.89
   2   3  16    1.70    0.87
   2   3  16    1.60    0.83
  -2   3  16    0.09    1.09
   3  -2  16    0.95    0.79
  -3   2  16    1.21    0.84
   2   3  16   -0.04    1.46
  -3  -2 -16    0.75    1.60
  -3  -2  17  143.68    5.32
  -2   3  17  147.43    5.66
  -3   2  17  132.48    7.85
  -2  -3  17  145.53    5.44
   2  -3  17  146.32    5.34
   2   3  17  131.14    4.25
  -2   3  17  135.83    8.35
   3  -2  17  144.71    5.17
   2   3  17  148.49    5.38
   3  -2 -17  156.58   11.59
   2  -3 -17  148.94   10.80
  -2   3 -17  146.85   11.08
   3   2 -17  154.78   12.07
   3   2  17  143.91    5.22
   2   3  17  135.59    9.11
  -3   2  17  148.41    5.51
  -2   3  17  134.79    4.31
  -3   2 -17  148.61   10.82
   3  -2  17  140.20    8.69
   2   3 -17  156.03   11.92
   3   2  17  139.06    9.22
  -2   3  18   18.45    3.28
   3   2  18   23.69    2.21
  -2   3  18   20.92    1.78
  -3   2  18   21.34    2.26
   2   3  18   21.37    1.73
  -2   3 -18   25.82    5.34
  -2   3  18   21.32    2.30
   3   2 -18   25.18    5.31
   2   3  18   25.40    4.20
   2  -3  18   22.63    2.23
   3  -2 -18   23.04    4.93
  -3   2 -18   24.60    4.68
  -2  -3  18   22.64    2.22
   2   3  18   20.75    2.20
   2  -3 -18   21.53    4.23
   3   2  18   22.25    3.98
   2   3 -18   25.31    5.18
  -3  -2  18   23.22    2.27
   3  -2  18   24.77    2.19
   3  -2  19    7.17    1.40
   3   2  19    6.26    2.36
   3  -2 -19    5.82    2.84
  -3   2  19    5.01    1.44
  -2   3 -19    7.21    3.02
  -2   3  19    5.96    1.16
  -2  -3  19    6.87    1.38
  -2   3  19    5.98    1.45
  -3   2 -19    3.36    2.05
   3   2 -19    3.37    2.67
   2  -3  19    6.02    1.41
  -3  -2  19    5.44    1.32
   2   3  19    6.65    1.17
   2   3 -19    7.46    3.30
   3   2  19    4.84    1.25
  -2   3  19    6.37    2.15
   2   3  19    6.32    1.43
   2   3  19    8.95    2.79
   2   3  20   43.16    3.33
   3  -2  20   42.55    2.98
  -3  -2  20   40.90    3.09
  -2   3  20   46.34    3.46
   3   2  20   41.08    3.12
   2  -3  20   45.60    3.13
  -3   2  20   43.60    3.26
  -2  -3  20   47.54    3.24
   3   2  21   27.93    2.59
  -3  -2  21   29.45    2.66
   2   3  21   31.39    2.82
  -2  -3  21   29.65    2.60
   3  -2  21   29.72    2.49
  -2   3  21   28.67    2.76
   2  -3  21   32.50    2.64
  -3   2  21   31.12    2.80
   2   3  22    1.38    1.07
  -3  -2  22    0.56    1.07
   3   2  22    0.89    1.11
   3  -2  22   -0.22    0.93
  -3   2  22    0.38    1.11
  -2  -3  22   -0.66    1.13
  -2   3  22    0.56    1.20
   2  -3  22    0.50    1.01
   3  -2  23   34.68    2.59
  -3  -2  23   32.47    2.58
  -2   3  23   34.61    2.95
   2  -3  23   33.72    2.60
   2   3  23   33.72    2.86
  -3   2  23   31.49    2.77
   3   2  23   34.21    2.70
  -2  -3  23   33.41    2.62
  -3   2  24    0.39    1.02
   3   2  24    0.03    0.90
  -2  -3  24    0.27    0.94
  -3  -2  24    1.72    1.15
   3  -2  24    0.55    0.89
   2  -3  24    0.39    0.92
  -2   3  24   -0.39    1.07
   2   3  24    0.91    1.01
  -3   2  25   24.96    2.20
   2   3  25   26.03    2.21
   3   2  25   25.28    2.13
   2  -3  25   28.42    2.16
  -2   3  25   25.63    2.24
  -2  -3  25   26.83    2.15
  -3  -2  25   25.40    2.13
   3  -2  25   27.11    2.08
   3  -2  26    0.84    0.67
   2   3  26    0.48    0.83
   2  -3  26    0.19    0.72
  -3   2  26    0.86    0.80
   3   2  26    0.31    0.68
  -3  -2  26    1.03    0.72
  -2   3  26    0.64    0.87
  -2  -3  26    0.30    0.66
  -3  -2  27   48.89    2.35
   3   2  27   45.85    2.28
   3  -2  27   49.25    2.34
   2   3  27   49.49    2.43
  -2  -3  27   46.88    2.32
  -2   3  27   47.66    2.42
  -3   2  27   44.82    2.30
   2  -3  27   49.23    2.35
   2  -3  28    0.57    0.46
  -3   3   0  132.99    4.09
  -3   3   0  135.95    5.47
  -3   3  -1    0.81    0.76
  -3   3   1    1.46    0.98
   3   3   1    0.60    1.07
   3   3   2   62.32    3.12
   3   3   2   56.53    3.29
  -3   3   2   55.61    2.99
   3   3  -2   55.36    1.54
   3   3   3    0.62    0.97
  -3  -3   3    1.68    2.29
  -3   3   3    1.37    1.21
   3   3   3   -0.60    0.83
   3   3   4   27.08    2.39
  -3  -3   4   28.19    3.00
   3   3   4   29.22    2.45
  -3  -3  -4   24.33    1.48
  -3   3   4   26.52    2.42
  -3   3   5    1.87    1.27
  -3   3  -5    1.13    1.59
   3   3   5    1.18    1.29
  -3  -3   5    1.83    1.78
  -3   3   5    2.00    1.46
   3   3   5    1.85    1.48
  -3  -3  -5    0.74    0.64
   3   3   6  257.40    8.00
  -3   3   6  256.25    8.44
  -3  -3  -6  245.27    6.17
  -3   3  -6  240.95    8.90
   3   3   6  264.16    8.23
  -3   3   6  243.67    7.40
  -3  -3   6  263.03    9.47
  -3   3  -7    5.93    2.75
   3   3   7    9.75    2.72
  -3  -3  -7    2.82    1.36
  -3   3   7    6.17    2.46
  -3   3   7    9.49    3.18
   3   3   7    7.51    2.56
  -3  -3   7    3.87    2.53
   3   3  -7    6.67    2.94
   3   3   8  228.60    8.61
   3   3  -8  220.26   10.09
  -3  -3   8  237.05    9.79
  -3   3   8  224.88    7.67
   3   3   8  228.60    8.49
  -3   3   8  242.64    9.24
  -3  -3  -8  228.36    7.15
  -3   3  -8  229.46    9.47
  -3  -3  -9    0.81    1.04
  -3   3  -9    0.14    1.56
   3   3  -9    1.19    2.04
  -3   3   9    3.41    2.28
  -3   3   9    1.91    1.63
  -3  -3   9    1.09    0.55
   3   3   9    1.70    1.67
   3   3   9    5.23    2.40
  -3   3  10   30.88    3.19
  -3   3 -10   30.29    3.87
   3   3  10   32.89    3.68
   3   3  10   30.34    3.58
   3   3 -10   33.08    4.33
  -3  -3 -10   37.02    3.29
  -3  -3 -11    0.30    0.98
  -3   3  11    1.24    1.35
   3   3  11    1.16    1.73
   3   3 -11   -0.25    1.77
   3   3  11    0.13    1.53
  -3   3 -11    3.05    2.16
  -3   3 -12    1.70    1.87
   3  -3  12    1.84    1.05
   3   3  12    1.98    1.33
  -3  -3 -12    2.53    1.44
   3  -3 -12    0.98    1.50
  -3   3  12    2.19    1.35
   3   3 -12    0.99    1.57
   3  -3 -13   -0.32    1.78
  -3   3  13    1.21    1.10
   3  -3  13    0.93    1.27
   3   3  13    1.83    1.72
  -3   3 -13    1.71    1.71
   3   3 -13    0.64    2.03
  -3  -3 -13   -0.24    1.12
   3  -3  14   91.09    6.35
   3   3  14   90.43    7.01
   3  -3 -14   86.97    7.73
   3   3 -14   94.94    8.55
  -3   3 -14   91.12    7.76
  -3   3  14   80.64    5.83
  -3  -3 -14   91.97    6.56
   3   3 -15    0.61    1.87
   3   3  15    2.28    1.96
   3  -3  15    0.84    0.90
  -3  -3  15    1.21    0.85
  -3   3 -15    1.60    1.94
   3   3  15    0.50    0.74
  -3   3  15    0.00    1.24
  -3   3  15    1.49    0.98
   3  -3 -15   -0.58    1.49
   3  -3  15    0.64    1.29
  -3   3  16  297.47    7.92
  -3   3  16  288.11   11.81
   3  -3 -16  300.07   15.30
   3  -3  16  294.16   12.12
  -3   3  16  268.47    6.36
   3   3  16  294.68    7.48
   3  -3  16  301.22    7.55
   3   3 -16  324.91   17.30
  -3  -3  16  293.46    7.63
  -3   3 -16  286.37   15.19
   3   3  16  289.28   13.36
   3   3  16  275.19    6.34
   3  -3 -17   -2.15    2.20
  -3   3  17    0.35    0.85
   3   3  17   -0.45    0.87
  -3   3  17    0.97    1.36
   3   3  17   -0.84    1.81
  -3  -3  17    0.31    0.80
  -3   3 -17    0.54    1.82
  -3   3  17    0.24    0.83
   3  -3  17   -0.06    0.81
   3   3  17    0.07    0.66
   3  -3 -18  269.89   15.51
  -3   3  18  256.88   11.68
  -3   3 -18  260.44   15.18
   3   3  18  270.38    7.57
  -3  -3  18  272.60    7.66
  -3   3  18  274.84    8.07
   3   3  18  259.98    6.20
  -3   3  18  253.35    6.19
   3   3  18  267.38   13.40
   3   3 -18  286.67   17.02
   3  -3  18  275.82    7.56
   3   3 -19    1.36    2.23
  -3   3  19   -0.50    1.13
   3  -3  19   -0.42    0.86
  -3   3  19    0.02    1.04
   3   3  19    0.43    0.72
   3   3  19    0.09    1.26
  -3   3 -19   -1.90    2.34
  -3  -3  19    0.22    0.99
   3   3  19    0.17    1.04
   3  -3  20   96.31    4.37
  -3  -3  20   92.30    4.46
   3   3  20   89.20    4.54
  -3   3  20   94.86    4.84
  -3   3  21   -0.40    1.09
   3   3  21   -0.07    0.96
   3  -3  21   -0.05    0.80
  -3  -3  21   -0.52    0.98
  -3  -3  22   12.47    1.78
   3  -3  22   12.99    1.76
  -3   3  22   11.91    1.94
   3   3  22   13.24    1.90
   3  -3  23   -1.15    0.96
  -3   3  23    0.19    1.11
   3   3  23   -0.46    1.08
  -3  -3  23    0.08    1.09
  -3   3  24   44.53    3.06
   3  -3  24   46.30    2.83
  -3  -3  24   45.84    2.89
   3   3  24   44.35    2.98
  -3  -3  25   -0.24    0.80
  -3   3  25   -0.42    0.87
   3  -3  25    0.47    0.70
   3   3  25   -0.23    0.74
   3  -3  26   60.78    2.79
  -3  -3  26   56.58    2.75
   3   3  26   59.94    2.87
  -3   3  26   58.65    2.96
   3  -3  27   -0.16    0.55
  -3  -3  27   -0.33    0.63
   3   3  27    0.44    0.61
   0   4   0 9599.78   91.26
   0   4   0 9999.00   86.33
   0  -4   0 9881.55   91.37
  -4   0   0 9638.71   87.90
   0   4   0 9758.09   86.36
   0  -4  -1    0.55    1.09
   0   4   1    0.43    0.75
  -4   0   1    0.28    0.91
   0   4  -1   -0.08    0.77
   0   4   1    0.80    0.74
   0   4   1    0.54    1.14
   0  -4   1    0.41    1.43
  -4   0   2 1346.88   17.12
   0   4   2 1402.95   17.49
   0   4   2 1357.59   19.64
  -4   0  -2 1347.98   19.27
   0  -4  -2 1376.13   19.01
   0   4   3    0.19    1.16
   0   4  -3    1.06    1.18
  -4   0   3   -0.07    0.78
   0  -4  -3    0.06    1.07
   0   4   3    0.14    0.79
   0   4   4  271.12    8.15
  -4   0  -4  267.67    7.75
   0  -4  -4  253.32    7.27
   0   4   4  263.02    7.01
  -4   0   4  266.46    6.75
   0   4  -4  274.67    7.97
  -4   0  -5    0.41    0.93
   0   4   5   -0.65    1.38
   0   4  -5   -0.91    1.19
  -4   0   5   -0.12    0.85
   0   4   5   -0.05    0.83
   0  -4   5    0.11    1.60
   0   4   6  960.87   16.40
   0  -4   6  960.77   19.14
   0   4   6  952.44   17.91
   0   4  -6  957.57   18.19
  -4   0  -6  944.88   17.39
  -4   0  -7    0.72    1.23
   0   4   7    0.98    1.60
   0  -4  -7    0.76    0.95
   0   4   7    0.74    1.21
   0   4  -7   -0.22    1.50
  -4   0   7    0.88    0.85
   0   4   8    4.38    2.09
   0   4  -8    2.55    1.78
   0  -4   8    3.59    1.04
  -4   0  -8    5.09    1.86
   0   4   8    3.70    1.75
  -4   0   8    6.29    1.28
   0  -4  -8    3.59    1.31
  -4   0  -9    0.68    1.30
   0   4  -9    0.44    2.11
   0  -4  -9   -0.61    1.03
  -4   0   9   -0.28    0.67
   0  -4   9    0.30    0.62
   0   4   9    1.08    1.46
   0   4   9    0.10    1.08
  -4   0  10   30.02    2.66
   0   4  10   29.36    3.15
  -4   0 -10   28.27    3.46
   0   4  10   31.42    3.78
   0   4 -10   30.14    3.95
   0  -4 -10   29.20    3.01
   0  -4  10   30.22    2.41
   0  -4  11    0.57    0.81
   0   4  11    0.42    1.61
  -4   0  11    0.92    0.94
   0  -4 -11   -0.32    0.88
   0   4 -11    0.56    1.68
   0   4  11    0.73    1.64
  -4   0 -11    0.80    1.80
   4   0  11    0.61    1.29
   4   0  12   93.11    6.57
   0   4  12  105.67    7.57
   0   4  12  101.06    6.54
   0   4 -12  104.78    7.78
  -4   0  12   99.12    5.21
   0  -4 -12  104.78    6.61
   0  -4  12   99.25    4.78
   4   0 -12   99.67    8.48
  -4   0 -12  101.78    7.04
   0  -4 -13   -0.52    1.10
  -4   0 -13   -0.06    1.42
   0   4 -13    0.01    1.78
   0   4  13   -1.00    1.34
   4   0  13    0.21    1.47
  -4   0  13    0.45    0.89
   4   0 -13    0.62    2.21
  -4   0 -14    5.85    2.43
  -4   0  14    3.76    1.43
   0   4  14    2.79    1.43
   0  -4 -14    2.87    1.63
   0   4 -14    3.75    1.99
   4   0 -14    1.89    1.98
   4   0  14    3.71    1.75
   0   4 -15    0.86    2.06
   4   0  15    0.15    0.64
   0  -4 -15   -0.48    1.29
   4   0  15    1.23    1.14
   0   4  15    0.53    1.40
   0   4  15    0.99    0.82
   4   0 -15    0.98    2.58
   0  -4  15    0.13    0.72
  -4   0 -15    0.56    1.38
   0   4  16  107.72    3.84
   0   4 -16  121.76   10.01
   0   4  16  110.90    7.91
   4   0 -16  126.58   10.64
   4   0  16  115.96    4.39
  -4   0  16  112.13    4.52
   4   0  16  116.70    8.33
  -4   0 -16  112.94    8.79
   0   4  16  118.56    4.87
   0  -4  16  122.30    4.88
   0  -4  17    0.86    0.97
   4   0 -17   -1.13    1.98
   0   4 -17   -1.21    2.81
   4   0  17   -0.41    1.45
  -4   0  17    0.65    0.81
   0   4  17    0.66    1.08
   4   0  17    0.97    0.97
   0   4  17    0.66    1.70
  -4   0 -17    0.72    1.64
   0   4  17    1.45    0.92
   0  -4  18  105.08    4.74
   0   4  18   96.76    7.75
   0   4  18  100.35    3.80
   0   4 -18  104.87   10.02
   4   0 -18  112.03   10.90
   4   0  18   95.11    7.80
   0   4  18  101.42    4.85
  -4   0 -18   93.10    8.61
   4   0  18  103.28    4.41
  -4   0  18  105.85    4.75
   0   4  19    0.86    1.30
   4   0 -19   -0.23    1.75
  -4   0  19    0.37    0.87
   0   4 -19   -4.37    2.87
   0   4  19   -0.39    0.73
   0   4  19    0.25    1.01
   4   0  19    0.40    1.72
   0  -4  19    0.06    1.00
   4   0  19    0.38    0.78
   4   0  20   22.10    2.19
   0  -4  20   21.36    2.27
   0   4  20   21.61    2.45
  -4   0  20   21.79    2.28
   0   4  20   20.25    1.75
   0   4  21   -0.66    0.83
   0  -4  21    0.13    1.00
  -4   0  21   -0.34    0.89
   4   0  21   -0.72    0.95
   0   4  21    0.13    1.08
   0  -4  22  134.84    5.24
  -4   0  22  128.46    5.26
   0   4  22  135.16    5.96
   4   0  22  131.13    5.09
   4   0  23   -0.44    0.97
   0  -4  23    0.42    1.13
   0   4  23    0.52    1.20
  -4   0  23   -0.64    0.96
   4   0  24  112.75    4.42
   0   4  24  109.29    4.88
  -4   0  24  107.47    4.56
   0  -4  24  111.99    4.57
   4   0  25   -0.82    0.79
   0  -4  25   -0.44    0.85
   0   4  25    0.12    0.95
  -4   0  25   -1.02    0.98
  -4   0  26   36.72    2.29
   4   0  26   39.56    2.29
   0  -4  26   39.83    2.31
   0   4  26   40.08    2.53
  -4   0  27    0.69    0.59
   0  -4  27   -0.63    0.64
   4   0  27   -0.16    0.52
   0  -4  28   32.99    1.63
  -1  -4   0   47.99    3.90
   1   4   0   50.64    4.03
  -1   4   0   54.42    4.00
   1  -4   0   47.09    3.37
   1   4   0   52.72    2.43
  -1   4   0   49.08    3.01
   1   4   0   47.69    2.12
   4  -1   0   37.05    1.22
  -4  -1   0   46.36    3.43
  -1   4   1  110.32    4.64
   1  -4   1  112.68    4.61
   1   4  -1  117.56    2.88
  -4  -1  -1  109.88    4.50
  -4   1   1  108.31    3.10
   1   4   1  100.16    2.06
   1   4  -1  118.39    3.63
   1   4   1  119.50    3.65
   1   4   1  106.24    4.73
   1  -4  -1  109.04    4.15
  -1   4   1  115.38    3.94
  -1   4  -1  103.64    4.14
   4   1   1  110.29    2.90
  -4  -1   1   99.17    4.14
  -1  -4  -1  112.68    5.02
  -4   1   2 3148.50   31.09
  -1   4   2 3454.21   37.21
   1  -4   2 3322.22   37.67
   4   1   2 3247.65   31.22
  -1   4  -2 3443.10   36.38
   1   4   2 3320.70   33.99
  -1  -4  -2 3441.81   38.12
   1  -4  -2 3211.26   34.40
  -1   4   2 3389.47   34.65
  -4  -1   2 3016.74   35.66
   1   4   2 3348.60   37.35
   1   4  -2 3495.81   35.11
  -4  -1  -3   88.00    4.07
  -4   1  -3   69.40    1.72
   4   1   3   90.62    2.97
   1   4   3   89.52    4.62
   1   4   3   90.59    3.88
  -1  -4  -3   88.56    4.47
  -4   1  -3   90.44    4.66
   1  -4  -3   87.48    3.77
  -4  -1   3   90.76    4.34
  -1   4   3   90.59    4.58
  -1   4  -3   92.02    4.53
  -4   1   3   83.67    2.60
   1   4  -3   94.09    4.37
   1  -4   3   84.74    4.85
  -1  -4  -4  467.85    6.17
  -4  -1  -4  510.28   10.50
   4   1   4  515.55    8.73
   1  -4  -4  513.08    9.80
   1   4   4  509.91   11.47
   1  -4   4  517.03   12.29
  -4  -1   4  512.14   11.04
  -1   4  -4  562.97   11.92
  -1  -4  -4  520.06   11.22
   1   4  -4  581.34   11.91
  -4   1  -4  533.96   11.89
  -1   4   4  501.41   11.40
   1   4   4  513.27   10.23
  -1  -4   5  801.50    8.95
  -1  -4   5  858.26   17.56
  -1   4  -5  867.14   16.27
  -4   1  -5  846.62   16.15
  -4  -1   5  855.94   15.36
  -1   4   5  862.76   14.65
   1   4  -5  820.20   16.01
  -4  -1  -5  837.74   14.52
   1  -4   5  872.11   16.95
   1   4   5  867.82   14.62
   1   4   5  853.92   16.00
  -1  -4  -5  777.41   10.53
   4   1   5  820.06   12.93
  -1   4   5  845.99   15.88
  -1  -4  -6  229.47    5.63
   1   4   6  221.36    8.08
   4   1   6  225.61    6.80
   1   4  -6  216.94    8.33
  -4   1   6  224.68    6.33
   1   4   6  231.81    7.46
  -1   4   6  225.33    8.19
  -1  -4   6  228.28    9.06
  -1   4   6  220.89    7.24
  -4  -1  -6  226.75    7.35
  -4   1  -6  215.09    8.03
  -4  -1   6  224.06    7.71
  -1  -4   6  202.75    3.86
  -1   4  -6  221.82    8.26
  -4  -1   7 2506.86   32.80
   4   1   7 2461.63   31.15
  -1   4   7 2533.66   34.42
  -1  -4   7 2596.28   37.02
  -4   1   7 2409.08   29.41
  -1   4  -7 2456.75   35.00
  -4  -1  -7 2525.70   32.47
   1   4   7 2499.28   32.10
   1   4   7 2453.58   33.94
   1   4  -7 2588.37   35.95
  -1  -4  -7 2455.40   28.56
  -4   1  -7 2529.47   34.38
  -1   4   7 2455.90   31.62
  -1   4   8    4.72    1.87
  -1   4   8    4.42    1.44
  -4  -1  -8    3.75    1.38
  -4  -1   8    4.61    0.96
   1   4  -8    3.08    1.59
  -1  -4   8    5.03    0.78
   1   4   8    4.91    1.56
  -1  -4  -8    3.44    0.99
  -1   4  -8    3.19    1.44
   1   4   8    5.20    1.82
  -4   1  -8    5.70    1.76
  -4   1   8    5.07    1.20
   1   4   9  689.95   17.05
  -1  -4   9  694.64   10.75
  -1   4  -9  695.62   17.71
   1   4  -9  710.74   18.37
  -1   4   9  719.52   17.60
   1   4   9  688.79   15.67
  -4   1   9  694.92   13.68
  -4  -1   9  698.91   12.29
  -4  -1  -9  718.44   16.29
  -4   1  -9  689.64   17.11
  -1  -4  -9  703.02   14.22
  -1   4   9  689.50   15.41
   1  -4 -10   69.50    5.06
  -4   1  10   68.96    4.20
  -1   4  10   76.65    5.83
   1   4 -10   65.66    5.59
  -1  -4 -10   71.37    4.52
  -1   4  10   71.35    4.89
  -4  -1  10   71.99    3.77
   1   4  10   72.32    5.11
  -4  -1 -10   67.76    5.08
   1  -4  10   72.86    4.17
   4   1  10   68.95    5.26
  -4   1 -10   66.85    5.29
   1   4  10   78.98    5.87
  -1  -4  10   67.25    3.15
  -1   4 -10   64.86    5.43
   1   4 -11  420.65   15.39
  -1   4  11  403.83   14.26
  -1  -4 -11  406.88   11.84
   1  -4 -11  398.99   12.88
   4   1 -11  371.53   15.59
   4   1  11  385.47   13.10
  -4   1  11  390.54   10.76
  -1   4 -11  401.73   14.66
  -1   4  11  387.03   12.19
   1   4  11  389.60   12.54
   1   4  11  394.87   14.06
  -4   1 -11  391.36   13.77
  -4  -1  11  408.56    9.70
   1  -4  11  408.58   10.63
  -4  -1 -11  390.26   13.00
  -1   4 -12    0.89    1.70
   1   4  12    1.53    1.59
   1   4  12    1.36    1.30
   1   4 -12    2.67    1.92
   4   1  12    0.53    1.16
   1  -4 -12    1.11    1.00
  -1  -4 -12    1.29    0.94
  -1   4  12    2.60    1.87
  -4  -1  12    1.83    0.71
   1  -4  12    1.18    0.79
  -4  -1 -12    0.68    1.15
  -1   4  12    1.31    1.23
   4   1 -12    1.80    2.38
  -4   1 -12    0.29    1.55
   4  -1  12    1.88    1.29
  -4   1  12    1.79    1.03
  -4  -1 -13  241.68   11.09
   1   4 -13  223.37   12.19
   4   1 -13  232.19   13.10
   1  -4 -13  238.05   10.74
   4  -1 -13  230.51   13.20
   1   4  13  224.77   11.66
   4   1  13  218.17   10.36
  -1  -4 -13  232.91    9.84
  -1   4  13  215.01    9.84
  -4   1  13  229.21    8.78
   1  -4  13  218.45    8.20
   1   4  13  225.63   10.19
  -4   1 -13  234.04   11.60
   4  -1  13  220.99   10.26
  -1   4 -13  221.65   11.92
   1   4 -14   34.93    5.21
   4   1  14   30.68    4.09
  -4   1  14   31.34    3.31
  -1   4  14   31.61    3.86
   4  -1  14   29.30    3.83
  -4   1 -14   33.62    4.61
   4   1 -14   35.14    5.39
   1   4  14   28.40    3.81
   4  -1 -14   33.30    5.17
  -1   4 -14   36.17    5.12
  -4  -1 -14   34.09    4.27
   1  -4 -14   36.85    4.65
  -1   4  15  138.00    8.42
   1   4  15  145.16    5.12
  -4   1 -15  151.91   10.20
   4  -1 -15  152.28   11.16
  -4  -1 -15  151.97    9.55
   4   1 -15  151.32   11.33
  -1   4  15  142.06    5.24
  -1   4 -15  141.54   10.49
   4   1  15  136.61    8.92
   1  -4  15  140.82    5.13
   1  -4 -15  147.72    9.31
   1   4  15  136.87    8.64
   4  -1  15  138.92    4.66
  -1  -4  15  141.53    5.20
   1   4 -15  149.78   10.77
   4  -1  15  140.04    8.77
   4   1  15  138.62    4.67
  -4   1  15  131.17    7.10
  -1   4  16    1.29    0.82
   4  -1  16    0.34    1.43
   1   4 -16    0.91    2.33
  -1   4 -16   -0.10    2.46
   4   1  16    2.14    1.87
  -4   1 -16    1.58    1.89
  -4  -1  16    1.10    0.81
   4  -1  16    1.38    0.78
  -4   1  16    0.53    0.84
  -4  -1 -16    2.10    1.67
  -4   1  16    1.16    0.84
   1   4  16   -0.17    1.15
   1   4  16    1.31    0.72
   1   4  16    0.76    0.82
   1  -4  16    0.51    0.85
  -1  -4  16   -0.01    0.78
   4  -1 -16    1.33    2.27
   4   1  16    1.52    0.88
  -1   4  16    0.33    1.31
  -1   4  16    1.40    1.10
   4   1 -16    0.91    2.17
  -4  -1 -17   67.75    6.75
   4  -1  17   69.39    3.50
  -1  -4  17   68.28    3.80
   4   1  17   65.93    6.60
   1   4  17   68.12    3.90
   4   1  17   69.86    3.54
  -4   1  17   71.22    3.81
   1   4  17   65.01    6.31
   1   4  17   65.27    3.04
  -1   4 -17   69.40    7.75
   4  -1  17   66.39    6.39
  -1   4  17   68.07    3.96
  -4  -1  17   67.59    3.61
   1  -4  17   68.37    3.77
  -1   4  17   61.82    3.01
  -1   4  17   65.17    6.06
   4   1 -17   80.06    8.98
  -4   1 -17   68.55    7.34
   1   4 -17   66.09    7.80
   4  -1 -17   65.21    7.77
   4  -1  18   20.67    2.03
  -1   4  18   20.96    1.89
  -4  -1  18   21.46    2.18
   1   4 -18   25.85    5.20
   1   4  18   19.63    3.86
  -4   1 -18   20.00    4.35
   4   1  18   21.92    2.14
   4  -1  18   18.69    3.49
  -1   4 -18   20.02    4.58
  -1  -4  18   23.13    2.31
   1   4  18   21.56    1.83
   1  -4  18   22.97    2.30
   4  -1 -18   21.13    4.61
  -1   4  18   20.16    3.61
  -1   4  18   21.90    2.41
   1   4  18   23.40    2.45
  -4   1  18   21.82    2.24
   4   1  18   22.21    4.14
   4   1 -18   27.54    5.71
  -1   4  19    2.87    1.24
   1   4  19    1.67    1.39
   1  -4  19    1.37    0.96
  -1   4  19    1.26    1.23
   4  -1  19    2.96    1.13
   4   1  19    0.92    1.28
   1   4  19    2.31    1.17
   4  -1  19    0.31    1.05
   1   4  19    1.81    0.79
  -4  -1  19    1.64    0.92
   1   4 -19    2.36    2.45
   4  -1 -19    2.04    2.06
  -1  -4  19    2.04    1.12
  -1   4 -19    1.24    1.75
  -1   4  19    2.08    1.06
   4   1 -19    2.16    2.07
  -4   1 -19    1.86    1.90
  -4   1  19    1.99    1.00
   4   1  19    2.95    0.94
  -1  -4  20   14.13    1.83
   1   4  20   12.47    1.99
   1   4  20   12.51    1.39
  -4  -1  20   12.61    1.81
  -4   1  20   13.43    1.98
  -1   4  20   10.83    1.33
   4  -1  20   13.62    1.74
  -1   4  20   13.23    2.04
   1  -4  20   13.18    1.86
   4   1  20   13.22    1.76
   1  -4  21    2.52    1.38
  -1   4  21    2.69    1.47
  -4   1  21    2.63    1.06
  -1   4  21    1.81    1.01
   4  -1  21    1.89    1.04
  -1  -4  21    2.20    1.32
  -4  -1  21    3.00    1.19
   4   1  21    2.03    1.09
   1   4  21    0.64    0.72
   1   4  21    2.44    1.36
  -1  -4  22   22.65    2.30
  -4   1  22   22.24    2.33
   4  -1  22   23.81    2.16
  -4  -1  22   22.85    2.30
  -1   4  22   22.05    2.57
   4   1  22   22.62    2.20
   1   4  22   23.04    2.59
   1  -4  22   23.75    2.25
   1  -4  23   25.87    2.32
   4  -1  23   25.27    2.22
  -1  -4  23   23.91    2.23
  -4   1  23   24.63    2.40
   1   4  23   25.82    2.48
   4   1  23   24.24    2.21
  -1   4  23   26.52    2.55
  -4  -1  23   25.82    2.29
   1   4  24   -0.05    1.12
  -1  -4  24    1.24    0.94
   1  -4  24   -0.27    1.04
  -4   1  24   -0.42    0.89
  -1   4  24    2.07    1.24
   4   1  24    1.19    0.83
   4  -1  24    1.14    0.89
  -4  -1  24    1.73    1.06
   4   1  25   58.36    3.05
  -1  -4  25   58.55    3.08
  -1   4  25   57.28    3.30
  -4  -1  25   53.63    2.94
   1   4  25   59.52    3.33
   4  -1  25   54.55    2.89
   1  -4  25   60.01    3.10
  -4   1  25   52.13    3.03
  -1  -4  26    3.68    0.95
  -1   4  26    5.39    1.23
   1  -4  26    3.86    0.91
   4  -1  26    4.04    0.86
   1   4  26    5.22    1.15
  -4   1  26    4.37    1.00
   4   1  26    4.54    0.98
  -4  -1  26    4.73    0.99
   4  -1  27   41.35    2.01
   1  -4  27   44.10    2.19
  -4  -1  27   38.23    1.95
  -4   1  27   39.35    2.02
   4   1  27   40.88    2.01
  -1  -4  27   42.15    2.16
   2   4   0 1692.00   18.20
  -4   2   0 1712.78   17.07
   2   4   0 1720.53   23.46
  -4  -2   0 1675.72   23.50
   2  -4   0 1655.26   20.54
   2   4   0 1724.84   17.85
  -2   4   0 1680.81   21.56
  -2   4   1   51.88    3.04
   2   4  -1   45.96    2.42
  -2   4  -1   51.34    3.12
   2  -4   1   49.94    3.12
  -4   2  -1   49.86    1.44
  -4  -2   1   63.46    4.37
   2   4  -1   52.98    1.77
  -4  -2  -1   53.32    3.81
  -2   4  -1   56.51    3.39
  -4   2   1   37.61    1.33
   2   4   1   53.37    2.44
   4   2   1   52.94    2.54
   2   4   1   52.60    3.34
   2  -4  -1   49.85    2.47
  -4   2   1   52.54    2.19
  -2   4   2  590.27   11.35
  -4  -2   2  588.98   12.45
   2   4   2  602.44   10.07
   4   2   2  559.36    9.41
   2  -4   2  565.88   11.33
   2   4  -2  580.85   10.58
   2   4   2  580.53   11.85
  -4   2  -2  558.98    6.73
   2  -4  -2  570.51    9.15
  -4   2   2  593.60    9.63
  -4  -2  -2  539.47   11.88
  -2   4  -2  610.28   12.15
  -2   4  -3  399.61    9.85
   2   4  -3  384.47    9.00
  -4  -2   3  371.55   10.09
  -2   4   3  385.37    9.35
  -2  -4  -3  371.51    9.79
   2  -4  -3  358.67    6.86
   2  -4   3  375.82    9.52
   4   2   3  353.38    7.47
   2   4   3  385.97    8.47
  -4   2   3  380.33    8.26
   2   4   3  372.17    9.51
  -2  -4  -4  988.81   17.43
   4   2   4 1006.46   14.69
  -2   4  -4 1044.20   17.94
   2   4   4 1025.87   15.89
  -4   2  -4 1043.99   18.04
  -4   2   4 1025.61   16.16
  -4  -2   4 1020.17   18.11
  -2   4   4  977.88   16.96
  -4  -2  -4  956.47   14.59
   2  -4  -4  969.12   13.56
   2   4   4  992.14   17.19
   2   4  -4  990.19   17.09
   4   2   5   21.39    2.01
   2   4   5   21.74    2.23
  -4   2   5   19.88    2.27
  -2   4   5   20.15    2.40
  -2   4  -5   20.95    2.56
  -4  -2   5   19.78    2.49
   2   4  -5   20.93    2.54
  -2  -4  -5   16.68    0.98
  -2  -4   5   20.25    2.55
   2   4   5   20.85    2.47
   2  -4  -5   20.69    1.72
  -4   2  -5   20.56    2.80
  -4  -2  -5   21.06    2.00
  -2   4   5   19.05    2.06
  -4  -2   6  159.09    7.07
  -4   2   6  155.18    5.67
   2   4   6  151.76    6.53
  -4   2  -6  156.82    7.11
  -2   4  -6  162.29    7.54
   2   4  -6  155.63    7.10
   2   4   6  154.62    6.30
  -2   4   6  155.39    5.96
  -4  -2  -6  151.64    5.59
  -2  -4   6  158.89    7.86
   4   2   6  158.81    5.78
  -2   4   6  154.96    6.71
  -2  -4  -6  150.22    3.99
  -4  -2   7    3.11    1.81
  -4  -2  -7    2.59    1.32
  -4   2  -7    2.53    1.91
   2   4   7    3.50    1.79
   4   2   7    3.58    1.77
  -2  -4  -7    2.34    0.85
  -2   4  -7    1.88    1.57
   2   4  -7    3.52    2.25
  -2   4   7    2.88    1.96
  -2  -4   7    3.75    2.32
   2   4   7    3.35    1.66
  -4   2   7    3.30    1.32
  -2   4   7    3.26    1.63
  -2  -4  -8  265.43    7.22
  -4   2   8  259.71    8.08
   4   2   8  270.09    9.74
  -4   2  -8  256.25   10.09
  -2   4   8  270.42   10.11
   4   2   8  272.88    8.92
  -2  -4   8  257.38   10.68
  -4  -2   8  271.94    9.91
   2   4   8  265.92    9.65
  -2   4  -8  248.14   10.20
  -4  -2  -8  272.15    8.69
   2   4  -8  255.64   10.35
   2   4   8  260.56    9.12
  -2   4   8  256.38    8.60
   4   2   9   -0.05    1.50
  -2   4  -9    0.47    1.49
   2   4   9    1.23    1.46
  -2   4   9    1.87    2.09
   4   2   9    1.34    1.21
  -4  -2  -9    0.49    1.03
  -4   2  -9   -0.64    1.81
   2   4  -9    0.32    1.84
  -2   4   9    2.00    1.37
   2   4   9    1.79    1.51
  -2  -4  -9    0.24    0.77
  -4   2   9    0.85    1.20
   2   4  10   11.69    2.17
   2   4  10   12.25    2.56
   4   2  10   11.94    2.37
  -2   4  10   12.05    2.51
  -2   4 -10   12.05    2.92
  -2   4  10   11.62    2.23
  -2  -4 -10   10.14    1.60
  -4  -2 -10   10.43    2.00
   2   4 -10   13.13    2.80
  -4   2 -10   10.40    2.36
   4   2 -10    9.86    2.84
  -4   2  10   12.00    1.96
   2   4  11   15.97    2.93
   2   4  11   14.28    2.83
  -2   4  11   15.05    2.53
  -4  -2 -11   15.54    2.72
   2   4 -11   17.49    3.40
  -2   4  11   18.29    3.52
  -2  -4 -11   15.50    2.21
   2  -4  11   15.75    2.40
  -4   2  11   14.12    2.36
  -4   2 -11   16.32    3.28
   2  -4 -11   14.12    2.90
  -2   4 -11   18.06    3.27
   4   2 -11   15.25    3.79
   4   2  11   16.57    3.12
   4   2  12    2.43    1.33
   2   4  12    3.58    1.62
  -4  -2 -12    3.78    1.49
   2   4  12    3.19    1.74
   4  -2  12    3.95    1.71
  -4   2 -12    3.12    1.70
  -2   4  12    3.46    2.02
   2  -4  12    1.97    1.10
  -2   4  12    2.60    1.24
   4   2 -12    2.06    1.90
   2   4 -12    2.63    1.78
  -4   2  12    2.10    1.07
   2  -4 -12    1.75    1.36
  -2  -4 -12    2.47    1.20
  -2   4 -12    3.03    2.09
   4  -2 -13    0.26    1.55
   2   4  13    0.80    1.53
  -2   4 -13    0.39    1.57
   2   4 -13    2.61    2.09
   4   2 -13    2.69    2.52
   4   2  13    1.48    2.02
  -4  -2 -13    0.77    1.18
  -4   2  13   -0.14    0.96
   4  -2  13    0.21    1.36
   2  -4  13    0.22    0.86
   2   4  13    0.92    1.64
  -4   2 -13    1.78    1.87
   2  -4 -13    0.36    1.62
  -2   4  13    1.44    1.55
   4  -2 -14  109.19    9.17
   2  -4 -14  108.07    7.95
  -2   4 -14  102.61    8.38
   4  -2  14   96.06    6.91
   2  -4  14   99.82    6.12
   4   2  14   98.83    7.31
  -2   4  14   95.99    6.71
   4   2 -14  102.43    9.08
  -4   2  14  100.50    6.19
  -4  -2 -14  106.52    7.30
  -4   2 -14  109.11    8.46
   2   4 -14   98.54    8.69
   2   4  14  103.64    7.37
  -4  -2  15   10.92    1.45
  -4   2  15   10.32    1.45
  -4   2  15   11.42    2.47
   4  -2  15   11.53    1.43
  -4  -2 -15   11.22    2.67
   4  -2  15   10.70    2.40
  -2  -4  15   11.58    1.58
   2   4 -15   11.75    3.48
   4   2  15   10.35    1.39
  -2   4 -15   11.74    3.41
   4   2  15    9.66    2.59
  -4   2 -15   11.53    3.55
   2  -4 -15   12.20    2.96
   2   4  15   12.06    1.58
  -2   4  15   10.18    1.54
  -2   4  15    8.67    2.23
   4  -2 -15   11.86    3.27
   2   4  15   14.46    3.12
   2   4  15   12.11    1.35
  -2   4  15   11.58    1.39
   2  -4  15   12.28    1.67
   4   2 -15   11.71    3.82
  -4   2  16  137.63    5.17
  -2   4  16  129.23    8.26
   2   4 -16  141.84   11.10
   4  -2 -16  142.22   10.88
   4   2  16  135.60    4.86
   2  -4 -16  143.90   10.03
  -2  -4  16  138.23    5.23
  -4   2  16  122.95    4.06
  -4  -2  16  134.60    5.03
   4  -2  16  123.26    8.42
  -4   2  16  136.91    7.78
   2  -4  16  142.63    5.16
  -2   4 -16  138.47   10.63
   2   4  16  141.30    9.22
   4   2  16  129.19    9.03
   4   2 -16  135.40   11.18
   2   4  16  138.77    5.17
  -4   2 -16  135.10   10.13
  -2   4  16  139.79    5.45
  -2   4  16  134.52    4.35
   4  -2  16  136.72    4.88
   2   4  16  130.15    4.32
   4   2 -17   48.44    7.06
   4   2  17   50.74    3.04
  -4   2  17   52.11    3.29
  -4   2  17   46.12    2.62
   2   4  17   49.48    2.66
  -2   4  17   47.12    5.18
   2  -4  17   54.11    3.24
  -2   4  17   47.99    2.68
  -2   4 -17   46.66    6.55
   2   4  17   49.45    5.66
   4  -2  17   44.92    5.20
   4   2  17   48.88    5.75
  -4  -2  17   49.47    3.12
   4  -2  17   51.16    3.01
  -4   2 -17   48.27    6.20
   2   4  17   50.14    3.26
  -2   4  17   52.10    3.45
  -4   2  17   46.24    4.66
   2   4 -17   53.44    7.16
   4  -2 -17   51.94    6.95
  -2  -4  17   51.40    3.28
  -2   4 -18  179.83   12.83
  -2   4  18  177.77   10.06
   4   2  18  176.98   11.02
   2   4 -18  190.81   13.70
   2   4  18  180.11    5.22
   2   4  18  192.57    6.64
  -4   2 -18  186.76   12.55
  -2   4  18  195.34    6.84
   4  -2  18  194.38    6.04
   4  -2  18  175.10   10.30
   4   2  18  184.38    6.02
  -4  -2  18  183.29    6.18
   4   2 -18  195.25   14.47
  -2   4  18  177.90    5.23
   2   4  18  183.83   11.05
   4  -2 -18  196.40   13.91
  -2  -4  18  185.27    6.38
   2  -4  18  191.11    6.29
  -4   2  18  187.59    6.48
  -2   4  19   15.08    2.92
  -4   2 -19   17.51    4.30
  -2   4 -19   19.82    4.54
   4  -2  19   17.21    1.88
   2   4  19   16.73    1.69
  -2   4  19   16.59    1.68
   2   4  19   16.57    3.74
   2   4  19   17.88    2.23
   4  -2 -19   17.50    4.44
   2  -4  19   17.78    2.06
  -4  -2  19   16.56    1.98
   4   2  19   14.88    3.23
   4   2  19   16.75    1.97
  -4   2  19   15.02    1.99
   4   2 -19   17.43    4.47
  -2   4  19   16.64    2.26
  -2  -4  19   16.81    2.03
   2   4 -19   13.86    4.23
   2   4  20   61.83    2.96
   2  -4  20   72.47    3.85
  -4  -2  20   66.61    3.80
   2   4  20   67.36    3.99
   4   2  20   69.76    3.77
  -4   2  20   66.04    3.92
  -2  -4  20   70.07    3.89
  -2   4  20   69.63    4.34
   4  -2  20   67.57    3.65
  -2   4  20   63.95    3.04
  -4   2  21    9.06    1.69
   2   4  21   10.93    1.58
   2  -4  21   10.45    1.77
   4   2  21    8.74    1.62
  -2   4  21    7.88    1.50
   4  -2  21    8.24    1.50
  -2   4  21    8.64    1.82
  -4  -2  21    8.15    1.62
   2   4  21    8.54    1.76
  -2  -4  21   10.91    1.85
  -2  -4  22   59.35    3.52
  -2   4  22   57.15    3.99
   4   2  22   60.96    3.58
   2  -4  22   59.33    3.45
   4  -2  22   60.31    3.34
   2   4  22   59.23    3.75
  -4   2  22   56.70    3.66
  -4  -2  22   54.58    3.39
  -2   4  23    7.71    1.62
   2  -4  23    7.96    1.50
  -4   2  23    7.31    1.59
   2   4  23    7.91    1.64
   4   2  23    6.96    1.42
  -2  -4  23    7.22    1.42
   4  -2  23    8.09    1.37
  -4  -2  23    7.68    1.34
  -4   2  24   37.71    2.77
   2   4  24   40.47    2.88
   2  -4  24   40.89    2.70
  -2  -4  24   40.04    2.74
  -4  -2  24   40.83    2.69
   4  -2  24   41.69    2.57
  -2   4  24   41.84    3.06
   4   2  24   41.56    2.77
   4  -2  25    1.37    0.79
   4   2  25    1.98    0.88
  -4   2  25    0.74    0.80
  -2   4  25    1.71    0.96
   2  -4  25    1.92    0.94
   2   4  25    1.73    1.01
  -2  -4  25    2.04    0.93
  -4  -2  25    1.38    0.77
  -2   4  26   42.39    2.59
   4  -2  26   45.21    2.35
   2  -4  26   46.22    2.39
   2   4  26   44.81    2.58
  -4   2  26   42.09    2.38
  -4  -2  26   41.65    2.34
  -2  -4  26   42.35    2.37
   4   2  26   45.39    2.42
   4  -2  27    0.61    0.54
  -2  -4  27    0.86    0.61
  -4   2  27    0.50    0.51
   2  -4  27    0.31    0.55
  -4  -2  27    0.24    0.48
   4   2  27   -0.93    0.65
   3   4   0  200.05    4.77
  -4   3   0  198.03    4.78
  -3   4   0  193.77    5.86
  -4  -3   0  187.59    7.49
  -4  -3   1  388.86   10.70
   3   4   1  432.94    8.06
  -4  -3  -1  404.17   10.94
  -4   3  -1  408.84    6.90
   3   4   1  402.67    9.99
  -4   3   1  399.27    7.65
   3  -4  -1  390.65    6.67
   3   4  -1  428.61    6.31
  -3   4   1  422.59    9.01
   4   3   1  392.01    8.93
  -3   4  -1  418.92    8.75
   3   4   2  650.91   12.91
  -3   4  -2  645.32   11.41
   4   3   2  654.32   11.63
   3   4   2  673.70   11.18
  -4  -3   2  686.13   14.75
  -4   3  -2  652.56    9.11
  -3   4   2  667.65   12.07
  -3   4  -2  726.28   14.05
   3  -4  -2  530.95    7.44
  -4   3   2  667.40   10.78
  -3  -4   3    4.95    1.99
  -3  -4  -3    1.53    1.25
  -4   3  -3    2.95    1.26
  -4  -3   3    2.41    1.46
   3   4   3    2.18    0.88
  -3   4  -3    3.86    1.53
   3   4   3    2.61    1.29
  -4   3   3    2.02    0.92
  -4  -3  -3    0.23    1.44
   3  -4  -3    1.55    0.36
   4   3   3    2.28    1.07
  -3   4   3    3.40    1.21
  -3   4   4    2.22    1.18
  -4   3  -4    1.34    1.43
  -3   4  -4    2.02    1.71
  -3   4   4    0.52    1.17
  -4  -3   4    1.53    1.72
   3  -4  -4    0.44    0.27
   3   4   4    4.35    1.35
   4   3   4    2.57    1.22
   3   4   4    0.95    1.29
  -3  -4  -4    0.48    1.47
   3   4  -4    2.10    1.49
  -4   3   4    2.14    1.31
  -3  -4   4    1.64    1.89
  -4   3  -5  170.07    7.32
  -3   4   5  172.09    6.67
  -4  -3   5  160.97    7.50
   3   4   5  159.50    6.32
   3   4   5  166.69    6.64
   3   4  -5  180.61    7.59
  -4   3   5  163.86    6.38
   4   3   5  174.57    6.65
   3  -4  -5  146.71    3.75
  -3   4   5  160.61    6.03
  -4  -3  -5  152.15    4.66
   4   3   5  153.25    5.88
  -3  -4   5  173.19    8.01
  -3   4  -5  175.45    7.55
  -4   3   6    1.67    1.31
   3   4   6    1.00    1.11
  -4   3   6    0.78    0.98
   3   4   6   -0.06    1.25
  -3  -4   6    2.58    1.95
  -3   4   6    1.50    1.43
  -4   3  -6    0.52    1.37
   3   4  -6    0.76    1.41
   4   3   6   -0.14    0.91
  -3   4   6   -0.03    0.92
  -3  -4  -6    0.20    0.39
   3  -4  -6    0.52    0.56
  -4  -3   6    1.54    1.75
   4   3   6    0.00    1.19
  -3   4  -6    1.64    1.66
  -4  -3  -6    0.38    0.78
  -3   4   7  348.53   10.95
  -4   3   7  346.33   10.78
  -3   4   7  326.10    9.58
   4   3   7  330.98    9.82
   3   4  -7  351.08   11.94
  -4   3  -7  327.90   11.45
  -4  -3   7  337.68   11.70
   3   4   7  350.86   10.55
  -3  -4   7  340.19   12.24
  -3  -4  -7  305.99    6.80
  -4   3   7  321.68    9.43
   3   4   7  336.95   10.40
   4   3   7  350.16   10.61
  -3   4  -7  332.86   11.53
  -4  -3  -7  325.76    8.21
  -4   3   8   19.52    2.52
  -4   3  -8   17.76    3.17
  -4  -3  -8   17.90    2.14
  -3   4  -8   21.47    3.39
  -4  -3   8   20.71    3.21
   4   3   8   20.54    3.04
   3   4  -8   20.56    3.32
   3   4   8   20.16    2.74
  -3  -4  -8   19.47    1.83
  -4   3   8   21.38    3.18
  -3   4   8   20.34    3.09
   3   4   8   22.58    2.96
  -3   4   8   18.77    2.47
   4   3   8   19.58    2.69
  -3  -4   8   25.51    3.71
   3   4   9  633.75   16.17
   4   3   9  629.83   15.52
   3   4  -9  678.96   18.53
  -4  -3  -9  637.64   13.86
  -4   3  -9  646.38   17.53
  -4  -3   9  657.37   17.45
  -3   4  -9  632.61   17.43
   4   3   9  643.30   16.02
  -3   4   9  650.78   16.97
  -3  -4   9  661.87   18.14
  -4   3   9  626.49   14.17
  -3  -4  -9  630.51   12.42
  -3   4   9  618.09   14.44
   4   3  -9  653.49   19.48
   3   4   9  631.02   15.90
   4   3  10   17.77    2.88
  -3  -4 -10   15.64    2.07
   3   4 -10   18.41    3.97
   4   3  10   13.96    2.66
  -4   3  10   14.07    2.41
  -3   4  10   12.56    2.34
   3   4  10   12.70    2.64
  -3   4 -10   16.07    3.42
   4   3 -10   18.24    3.65
  -4  -3 -10   15.92    2.52
  -3   4  10   14.65    2.92
  -4   3 -10   15.45    3.40
   3   4  10   13.20    2.53
   3   4 -11   91.00    7.43
  -4  -3 -11   94.08    5.68
   4   3  11   96.19    6.58
  -4   3 -11   88.16    6.90
  -3   4  11   95.26    7.00
  -3   4 -11   86.61    6.99
  -3   4  11   85.46    5.66
   3   4  11   90.50    6.29
   4   3  11   95.99    6.54
   4   3 -11   97.39    7.93
  -4   3  11   91.21    5.62
   3   4  11   91.40    6.68
  -3   4  12   24.75    3.30
   3   4 -12   28.96    4.71
  -4   3  12   24.50    3.13
   4   3 -12   27.24    4.49
  -4   3 -12   23.08    3.89
   3   4  12   24.52    3.62
   4   3  12   29.67    4.04
  -3   4 -12   27.25    4.31
   3   4  12   27.02    4.05
  -4  -3 -12   28.45    3.41
   3   4 -13  425.49   17.66
  -3   4 -13  405.67   16.26
   3   4  13  398.53   14.60
   4  -3  13  404.68   14.09
   3   4  13  402.44   15.71
   3  -4 -13  410.57   16.16
  -4  -3 -13  413.12   13.54
  -4   3 -13  399.59   15.99
   3  -4  13  396.26   12.98
  -3   4  13  381.12   13.10
   4   3 -13  417.51   17.69
  -4   3  13  382.74   12.54
   4   3  13  399.17   14.67
   4  -3 -14   12.02    3.54
   4   3  14    8.97    2.51
  -4   3 -14   10.32    3.07
  -3   4 -14    7.81    2.68
   3   4  14   10.87    2.69
   4   3 -14    9.80    3.09
  -4   3  14    8.41    2.12
   3  -4  14    9.20    2.07
   3  -4 -14    9.99    2.74
  -3   4  14    9.93    2.31
   4  -3  14    9.38    2.39
   3   4 -14   10.95    3.55
  -3   4  15  294.50   12.14
   4   3 -15  303.85   16.51
  -4   3  15  310.57    7.81
   4  -3  15  297.03    7.31
  -3  -4  15  300.40    7.67
   4  -3  15  302.43   12.64
   3   4  15  317.55    7.66
   3  -4  15  305.01    7.58
  -4   3  15  285.81    6.54
   3   4  15  290.85    6.58
   4   3  15  304.74   13.81
  -4  -3  15  295.64    7.46
   3   4  15  301.33   13.37
  -4   3 -15  300.60   15.22
   3  -4  15  297.20   11.76
  -3   4  15  315.94    8.10
   4   3  15  279.58    6.35
   3   4 -15  322.75   16.84
  -4   3  15  291.75   11.57
   3  -4 -15  312.25   14.82
  -3   4 -15  310.08   15.47
  -3   4  15  293.78    6.62
   4  -3 -15  311.29   16.00
   4   3  15  303.04    7.32
   4   3  16    7.49    1.25
   3  -4 -16    9.30    2.97
   4   3 -16    8.81    3.36
   4   3  16    7.52    1.16
  -4  -3  16    7.05    1.32
  -4   3  16    6.68    2.00
   3   4  16    8.13    2.76
  -4   3 -16    7.30    2.84
   3  -4  16    7.06    1.29
   4  -3 -16    8.02    3.17
   4  -3  16    7.94    2.25
   4  -3  16    7.91    1.39
  -3  -4  16    8.42    1.51
   4   3  16    8.51    2.54
  -3   4  16    7.13    1.14
   3   4  16    6.20    1.07
  -3   4  16    6.05    1.38
  -3   4  16    7.64    2.20
  -4   3  16    7.09    1.22
   3   4 -16    9.20    3.21
  -3   4 -16    8.87    3.06
  -4   3  16    7.15    1.46
   3   4  16    6.51    1.34
  -3  -4  17   44.61    3.01
  -3   4 -17   40.36    5.89
   4  -3  17   37.67    4.68
   3   4  17   44.96    2.53
   4   3  17   44.36    5.42
   3  -4  17   47.36    3.05
   3   4  17   43.28    5.30
   4   3  17   44.04    2.89
   4   3 -17   45.27    6.93
   3  -4 -17   43.90    6.09
   4  -3  17   43.56    2.84
   3   4 -17   41.95    6.63
  -3   4  17   46.36    3.26
  -4  -3  17   43.19    2.92
   4  -3 -17   43.78    6.49
   4   3  17   44.65    2.52
  -4   3  17   43.64    3.11
   3   4  17   44.66    3.05
  -3   4  17   39.53    4.73
  -4   3 -17   46.56    6.32
  -3   4  17   43.47    2.59
  -4   3  17   40.81    4.59
  -4   3  17   43.23    3.30
   3  -4  18   92.46    4.35
  -4  -3  18   97.96    4.45
   4   3  18   91.17    3.52
  -4   3  18   81.05    6.51
   4   3  18   93.95    8.13
   4  -3 -18   93.14    9.48
   4   3  18   93.90    4.42
   3   4 -18   93.40    9.84
  -4   3 -18   92.74    9.11
  -4   3  18   94.75    4.73
   3   4  18   86.92    7.81
  -3  -4  18   87.45    4.33
   4  -3  18   94.57    4.25
  -3   4  18   80.08    6.63
   3   4  18   89.46    3.65
   4   3 -18  101.61   10.40
  -3   4  18   92.16    3.74
  -3   4 -18   89.92    9.15
  -4   3  18   91.76    3.91
  -3   4  18   88.63    4.71
   3   4  18   92.43    4.48
  -3   4  19   93.43    3.76
   3  -4  19   97.49    4.50
   3   4  19   94.10    3.71
  -3   4  19   83.11    6.81
   4   3  19   90.13    8.00
  -3  -4  19   92.96    4.49
  -4  -3  19   97.58    4.50
  -4   3 -19   82.03    8.84
   4  -3  19   98.21    4.44
   4   3  19   88.76    4.42
  -4   3  19   93.15    4.65
   3   4  19   94.92    8.26
  -4   3  19   85.07    3.78
   3   4  19   98.30    4.77
   4   3  19   84.72    3.43
  -3   4 -19   88.57    9.53
   4   3 -19   96.58   10.20
  -3   4  19   99.32    4.94
   3   4 -19   95.98   10.18
   3  -4  20    0.60    0.96
  -4   3  20    0.19    0.92
   3   4  20    1.25    1.14
   3   4  20    0.11    0.75
  -3   4  20   -1.02    1.40
  -3  -4  20    1.39    1.22
  -4   3  20    0.83    2.26
   4   3  20    0.43    0.99
   4  -3  20    0.68    0.84
  -3   4  20    0.55    1.15
  -4  -3  20    0.72    0.92
   4  -3  21    3.08    1.10
  -3  -4  21    3.14    1.19
   3   4  21    3.10    1.28
  -3   4  21    2.40    1.81
  -3   4  21    2.54    1.23
   3   4  21    3.42    0.87
  -4  -3  21    2.86    1.12
   3  -4  21    3.02    1.20
   4   3  21    3.46    1.20
  -4   3  21    4.19    1.37
  -3  -4  22   22.58    2.30
   3   4  22   20.25    2.36
   4  -3  22   25.38    2.25
  -4   3  22   23.14    2.50
  -3   4  22   23.48    2.63
  -4  -3  22   24.06    2.31
   4   3  22   23.98    2.34
   3  -4  22   23.74    2.21
  -3  -4  23    5.79    1.31
  -4  -3  23    5.87    1.26
  -4   3  23    5.93    1.40
   3   4  23    5.44    1.30
   4  -3  23    6.27    1.23
   3  -4  23    7.18    1.36
   4   3  23    7.15    1.47
  -3   4  23    6.87    1.58
  -3  -4  24    1.89    0.97
   4   3  24    1.71    0.95
   3   4  24    1.65    0.96
   4  -3  24    2.12    0.93
  -4  -3  24    2.22    0.97
   3  -4  24    2.14    1.02
  -3   4  24    0.29    0.91
  -4   3  24    0.73    0.92
   3  -4  25   23.90    1.88
  -4   3  25   23.02    2.06
  -3   4  25   24.05    2.16
   3   4  25   24.76    2.03
  -4  -3  25   21.86    1.84
   4  -3  25   22.58    1.80
   4   3  25   23.07    1.89
  -3  -4  25   23.46    1.90
   4  -3  26   -0.75    0.64
   3  -4  26   -0.81    0.70
  -4  -3  26   -0.35    0.61
  -3   4  26   -0.04    0.75
  -3  -4  26    0.91    0.70
  -4   3  26    0.43    0.69
   4   3  26    0.37    0.62
   3   4  26    0.48    0.72
  -3  -4  27   62.10    2.42
   3  -4  27   64.94    2.44
  -4  -3  27   59.41    2.29
   4  -3  27   64.06    2.38
  -4  -4   0  298.61   10.16
   4   4   0  321.19    6.77
   4   4   0  306.52    8.92
  -4   4   0  317.19    7.28
   4   4  -1    0.53    0.50
  -4   4  -1    0.02    0.68
   4   4   1    1.06    0.81
   4   4   1    0.40    1.05
  -4   4   1    0.36    0.73
  -4  -4  -1    0.63    1.33
  -4  -4   1    0.93    1.67
  -4   4  -1    0.15    1.22
  -4  -4  -2  325.65   10.51
  -4  -4   2  326.53   11.01
  -4   4  -2  344.75   10.31
  -4   4  -2  309.35    7.11
   4   4   2  331.52    8.05
   4   4  -2  285.08    4.75
  -4   4   2  319.81    8.03
   4   4   2  296.64    8.62
   4   4   3    3.05    1.58
  -4  -4   3    2.44    2.31
  -4   4  -3    1.78    1.90
   4   4   3    1.77    1.44
  -4  -4  -3    2.26    1.82
  -4   4  -3    1.08    1.02
  -4   4   3    2.10    1.35
  -4   4  -4  728.64   16.58
   4   4   4  758.86   14.44
  -4  -4  -4  752.42   16.50
  -4  -4   4  728.81   17.46
   4   4   4  722.48   14.40
  -4   4   4  772.29   14.65
  -4   4  -5    0.10    1.38
  -4   4   5    0.80    1.11
   4   4   5    0.27    0.92
   4   4   5    0.58    1.02
  -4  -4   5    0.57    1.57
  -4  -4  -5    1.32    1.33
  -4   4   6  307.32    9.89
   4   4   6  312.39    9.67
  -4  -4   6  309.50   11.64
  -4   4  -6  310.19   11.17
   4   4   6  294.44    9.44
  -4   4   6  290.01    8.99
  -4   4   7    4.61    2.17
  -4   4   7    2.17    1.90
  -4   4  -7    3.58    2.50
  -4  -4  -7    1.29    0.79
   4   4   7    1.22    1.38
   4   4  -7    3.94    2.87
  -4  -4   7   -0.18    1.95
   4   4   7    2.67    2.19
   4   4  -8   22.50    3.65
  -4   4   8   24.08    3.22
  -4  -4  -8   21.62    2.00
   4   4   8   24.19    3.29
  -4   4  -8   22.09    3.82
  -4  -4   8   24.36    3.82
   4   4   8   24.82    3.18
  -4   4   8   21.52    2.73
  -4   4   9    0.88    1.42
  -4   4   9    1.22    1.56
   4   4  -9    0.83    1.91
   4   4   9    0.13    1.35
  -4  -4   9    0.83    1.94
  -4   4  -9    0.61    1.95
   4   4   9    1.33    1.62
  -4   4 -10   29.00    4.15
   4   4 -10   29.58    4.23
   4   4  10   30.18    3.70
  -4   4  10   33.90    4.28
   4   4  10   32.82    3.89
  -4   4  10   27.47    3.18
   4   4  11    0.50    1.71
   4   4 -11    1.12    2.51
  -4   4 -11    1.09    2.00
   4   4  11    0.00    1.40
  -4   4  11    0.25    1.21
   4   4  12   76.23    6.43
   4   4 -12   68.80    7.08
   4   4  12   73.18    6.11
  -4   4  12   66.71    5.33
  -4   4 -12   67.84    6.81
   4   4 -13    4.75    3.34
  -4   4 -13    0.58    1.75
   4  -4  13   -0.06    1.10
  -4   4  13    1.02    0.96
   4   4  13    2.23    1.90
   4   4 -14   17.62    4.15
   4  -4  14   15.01    2.77
  -4   4  14   14.77    2.73
   4   4  14   17.73    1.74
   4   4  14   15.82    3.35
  -4   4 -14   16.14    3.81
   4  -4 -14   15.32    3.40
   4  -4  14   15.98    1.63
  -4   4 -15    2.19    2.50
   4   4  15    0.49    0.66
  -4   4  15    0.63    0.92
   4  -4 -15   -0.87    1.89
  -4   4  15    0.18    0.84
  -4  -4  15    0.94    1.00
   4  -4  15   -0.20    0.67
   4   4  15    2.14    1.76
   4  -4  15    1.72    1.49
  -4   4  15   -0.26    1.15
   4   4  15    0.71    0.81
  -4  -4  16  142.99    5.36
   4   4  16  145.19    4.69
   4  -4  16  156.21    5.35
  -4   4  16  155.40    5.88
   4   4  16  142.04    9.78
   4   4  16  153.82    5.39
  -4   4  16  147.47    4.75
   4  -4 -16  151.41   11.31
   4   4 -16  165.59   12.72
  -4   4  16  146.23    8.71
  -4   4 -16  154.53   11.39
  -4  -4  17    0.78    0.80
   4  -4  17   -0.38    0.74
   4   4  17   -0.50    1.39
   4   4  17    0.41    0.82
   4   4  17    0.11    0.76
   4   4 -17   -0.14    2.11
  -4   4  17    0.54    1.19
  -4   4 -17    0.78    2.19
  -4   4  17    0.83    1.12
  -4   4  17    0.45    0.89
   4  -4 -17   -0.31    1.59
  -4   4  18   86.68    6.89
  -4   4  18   96.49    4.79
   4   4  18   93.03    4.51
   4  -4  18   98.45    4.32
  -4  -4  18   96.91    4.49
  -4   4 -18   91.62    9.11
   4   4  18   94.49    8.27
   4   4 -18   95.37   10.21
   4   4  18   94.31    3.74
  -4   4  18   89.28    3.77
  -4   4  19    0.17    1.06
  -4  -4  19    0.66    0.85
  -4   4  19    1.46    1.65
   4  -4  19   -0.29    0.90
   4   4  19    0.15    0.75
   4   4  19    0.66    0.92
   4   4  20  210.85    6.93
  -4  -4  20  205.37    6.64
   4  -4  20  217.48    6.57
   4   4  20  197.68    5.36
  -4   4  20  193.20    5.67
  -4   4  20  214.94    7.58
   4  -4  21   -1.38    0.91
  -4   4  21   -0.63    1.11
  -4  -4  21   -0.28    0.98
   4   4  21    0.50    0.64
   4   4  21    0.52    0.90
  -4  -4  22   54.74    3.28
   4  -4  22   58.48    3.25
  -4   4  22   52.76    3.54
   4   4  22   56.49    3.47
  -4   4  23   -0.24    1.04
   4   4  23   -0.05    0.87
  -4  -4  23   -0.29    0.87
   4  -4  23    0.38    0.87
  -4  -4  24   36.99    2.44
  -4   4  24   35.88    2.65
   4   4  24   35.15    2.55
   4  -4  24   37.95    2.42
   4   4  25    0.01    0.74
  -4   4  25   -0.86    0.81
  -4  -4  25    0.36    0.69
   4  -4  25   -0.23    0.62
  -4  -4  26   16.78    1.40
   4  -4  26   17.85    1.44
   4  -4  27   -0.14    0.46
   0   5   0   -0.10    0.62
  -5   0   0   -0.90    1.20
   0  -5   0    0.79    1.28
   0   5   0   -0.13    1.34
   0   5   0    0.23    0.66
  -5   0   1  556.84   10.67
   0   5   1  601.23   10.30
   0   5   1  582.98   12.94
   0   5  -1  600.52   10.66
   0  -5  -1  598.91   12.84
   0  -5   1  591.15   13.23
   0  -5   2    1.30    1.39
   0  -5  -2    0.02    1.20
   0   5   2    0.24    0.68
  -5   0   2   -0.45    1.08
   0   5  -2   -0.01    1.00
   0   5   2   -0.27    1.31
   0  -5   3 1114.90   20.09
   0   5  -3 1098.48   17.47
  -5   0  -3 1044.05   18.12
  -5   0   3 1057.28   15.87
   0   5   3 1057.34   18.47
   0   5   3 1065.74   16.20
   0  -5  -3 1036.10   17.72
   0   5   4   -0.32    1.44
   0   5   4    0.85    0.77
   0  -5  -4    0.88    1.02
  -5   0  -4    0.50    1.04
   0   5  -4   -0.19    1.05
   0  -5   4    0.26    1.60
  -5   0   4    0.13    0.96
  -5   0   5  713.61   12.97
  -5   0  -5  727.22   15.17
   0   5   5  708.23   13.91
   0   5  -5  718.97   15.14
   0  -5  -5  724.38   14.33
   0   5   5  713.66   15.45
   0  -5   5  716.21   16.82
   0  -5  -6    0.08    0.98
  -5   0  -6   -0.08    1.09
   0   5   6    1.96    1.66
   0   5  -6    0.93    1.45
   0  -5   6    0.49    1.56
  -5   0   6    0.35    1.01
   0   5   6    0.92    1.09
   0   5  -7  640.97   15.93
   0  -5   7  659.82   16.93
   0   5   7  634.00   14.27
   0   5   7  643.70   15.73
  -5   0  -7  642.67   15.05
   0  -5  -7  627.77   12.01
  -5   0  -8    0.65    1.20
   0   5   8   -0.34    1.11
   0   5   8   -0.01    1.38
   0   5  -8   -0.70    1.69
   0  -5  -8   -0.10    0.82
   0   5  -9  388.29   13.67
   0   5   9  394.87   11.74
  -5   0  -9  395.49   12.95
   0   5   9  422.29   13.48
   0  -5  -9  402.01   10.44
   0  -5   9  390.78    8.24
   0   5  10    0.18    1.28
   0   5  10   -0.81    1.80
  -5   0 -10   -0.09    1.48
   0  -5 -10    0.44    0.90
   0   5 -10    2.53    2.31
  -5   0 -11  147.05    8.50
   0   5  11  146.22    7.71
   0   5 -11  147.27    9.16
   0   5  11  153.57    9.02
   0  -5 -11  155.26    7.23
   5   0  12    0.98    1.31
  -5   0 -12   -0.70    1.62
   0   5  12   -0.26    2.00
   0  -5 -12    0.81    0.87
   0   5  12   -0.40    1.21
   0   5 -12   -0.44    1.93
   5   0 -13  205.58   13.04
  -5   0 -13  220.50   11.16
   5   0  13  209.85   10.55
   0   5 -13  201.65   11.80
   0   5  13  212.98   10.09
   0   5  13  212.03   11.76
   0   5  14    0.18    1.62
   0   5 -14    2.00    2.10
  -5   0 -14    0.60    1.43
   5   0  14    0.64    1.49
   0  -5  14   -0.13    0.71
   5   0 -14    0.59    2.09
  -5   0  15   77.41    3.67
   5   0  15   84.08    7.13
  -5   0 -15   94.91    8.07
   0   5  15   85.87    4.27
   0  -5  15   82.81    4.21
   5   0  15   81.37    3.51
   0   5 -15   92.63    8.69
   0   5  15   83.49    3.39
   0  -5  15   79.10    3.59
   0   5  15   87.13    7.01
   5   0 -15   89.83    9.17
   5   0  16    0.15    0.67
   0   5  16    0.39    1.32
   0   5  16    0.06    0.77
   0  -5  16    0.22    1.00
  -5   0 -16    0.86    1.90
   0   5 -16   -1.41    2.13
   0  -5  16    4.47    2.43
  -5   0  16    0.47    0.78
   5   0 -16    1.02    2.39
   5   0  16    0.41    1.39
   0   5  16    0.29    0.95
  -5   0 -17   60.98    6.81
   0  -5  17   72.55    3.95
   5   0 -17   69.14    8.65
   5   0  17   59.43    6.34
  -5   0  17   61.84    3.48
   0   5 -17   64.81    7.77
   0   5  17   64.48    6.40
   0   5  17   62.83    3.11
   0  -5  17   64.15    3.31
   5   0  17   66.28    3.41
   0   5  17   66.27    4.01
   0  -5  18    0.34    1.11
  -5   0 -18    1.31    1.56
   0   5  18    0.38    1.19
   0   5  18    0.08    1.35
   0   5 -18   -0.40    2.13
   5   0  18    0.77    1.53
   5   0  18    0.37    0.75
   0   5  18    0.60    0.97
  -5   0  18    0.50    0.84
   5   0 -18    1.28    2.66
   0  -5  19    1.31    1.08
   5   0  19    0.48    0.78
   0   5  19    2.28    1.85
   0   5  19    1.01    0.84
   0   5 -19    0.44    2.16
   5   0  19    0.00    1.23
   5   0 -19    0.60    2.64
   0   5  19    3.82    1.64
  -5   0  19    1.86    1.16
   5   0  20    0.25    0.85
   0   5  20    0.41    0.88
   0   5  20    0.14    1.14
   0  -5  20    0.50    1.14
  -5   0  20    1.42    0.95
   0  -5  21   48.26    3.26
   0   5  21   45.97    2.57
   0   5  21   50.32    3.72
  -5   0  21   46.32    3.15
   5   0  21   47.53    3.01
   0   5  22    1.13    1.28
  -5   0  22    0.64    0.95
   0   5  22   -0.31    0.86
   0  -5  22   -0.68    1.11
   5   0  22   -0.63    0.86
   0   5  23   19.34    1.70
   0  -5  23   20.43    2.17
   5   0  23   19.48    1.92
   0   5  23   21.04    2.39
  -5   0  23   18.44    1.92
   0   5  24    0.31    1.00
   0  -5  24    0.07    0.90
  -5   0  24    0.46    0.79
   5   0  24    0.30    0.76
   0   5  25   37.34    2.64
   0  -5  25   36.39    2.39
   5   0  25   35.79    2.28
  -5   0  25   32.32    2.22
   5   0  26   -0.02    0.55
   0  -5  26   -0.41    0.66
  -5   0  26   -1.05    0.63
   0  -5  27   39.06    1.96
   5   0  27   35.68    1.69
   1   5   0  568.95   12.87
   1   5   0  562.12    8.60
   1   5   0  571.98    9.08
   1  -5   0  572.19   11.93
  -1  -5   0  558.23   13.27
  -5   1   0  538.46    9.58
  -5  -1   0  570.23   11.86
  -1   5   0  583.22   10.66
  -1   5   0  559.79   12.43
  -1   5   1  158.86    4.96
  -1   5   1  154.71    6.19
   5   1   1  155.01    3.50
   1  -5   1  157.54    6.08
  -1   5  -1  151.58    5.30
  -5  -1   1  145.99    5.51
   1   5   1  134.68    2.90
   1  -5  -1  150.80    5.60
  -1  -5   1  153.80    6.65
  -5  -1  -1  151.15    5.85
   1   5   1  151.35    4.56
  -1   5  -1  149.28    6.17
  -5   1   1  153.44    4.35
  -1  -5  -1  145.85    6.28
   1   5   1  151.11    6.22
   1   5  -1  150.07    4.55
  -1   5   2   86.58    4.03
  -5   1  -2   86.53    5.06
  -1  -5  -2   92.09    5.05
  -1   5   2   89.11    4.80
   1  -5  -2   87.37    4.26
   1   5   2   85.62    3.76
  -1   5  -2   89.77    4.48
  -1  -5   2   91.09    5.55
  -5   1   2   83.93    3.07
   1   5   2   82.56    4.85
   1  -5   2   94.93    5.13
   5   1   2   78.78    2.46
   1   5  -2   89.33    3.99
  -5  -1   2   80.39    4.29
  -1  -5   3  130.61    6.54
  -1  -5  -3  120.54    5.77
   1   5   3  121.95    5.78
   1  -5  -3  105.88    4.62
  -5  -1   3  109.94    5.12
   1  -5   3  106.29    5.64
  -1   5  -3  117.59    5.33
  -5   1  -3  119.09    5.69
   1   5  -3  118.17    4.98
   5   1   3  117.89    3.24
   1   5   3  118.53    4.67
  -5   1   3  113.87    3.44
  -1   5   3  118.61    5.64
  -1   5   3  114.28    4.74
   1   5   4  471.15   11.71
  -1   5   4  468.60   11.68
  -5  -1  -4  437.43   10.28
  -1  -5  -4  466.02   11.64
  -5  -1   4  451.73   10.61
  -1   5   4  454.11   10.15
   1   5  -4  450.70   10.79
   1   5   4  461.60   10.10
   5   1   4  478.57    7.84
  -5   1  -4  473.07   11.97
  -1  -5   4  477.87   13.04
   1  -5   4  460.48   12.13
   1  -5  -4  455.27   10.06
  -5   1   4  438.95    7.29
  -1   5  -4  450.34   11.15
  -1  -5   5   84.90    5.75
   1   5   5   79.34    4.97
  -5   1  -5   79.22    5.04
  -5  -1  -5   78.43    4.57
   1   5  -5   83.53    5.02
  -1   5  -5   74.64    4.93
  -1   5   5   84.03    5.00
   1  -5  -5   78.30    4.23
   5   1   5   86.31    3.60
   1  -5   5   78.09    5.20
   1   5   5   77.47    4.29
  -1   5   5   80.85    4.43
  -1  -5  -5   75.51    4.63
  -5  -1   5   78.18    4.47
   5   1   6   66.18    3.53
  -1  -5   6   50.83    1.54
  -5  -1  -6   60.62    4.26
  -1   5   6   71.14    4.42
  -1  -5   6   78.11    5.69
  -5  -1   6   67.46    4.45
  -1  -5  -6   75.04    4.76
  -1  -5  -6   63.22    2.43
  -1   5  -6   73.99    5.23
  -5   1  -6   66.37    4.82
   1   5  -6   74.60    5.26
  -1   5   6   71.97    4.88
   1  -5  -6   73.10    4.08
   1   5   6   69.91    5.04
   1   5   6   72.35    4.33
  -1  -5   7   36.93    1.47
  -5  -1  -7   53.98    4.10
  -1   5   7   49.87    4.38
  -1  -5   7   51.50    4.85
   1  -5  -7   50.93    3.56
  -1   5   7   46.73    3.79
   1   5  -7   54.58    4.83
  -5  -1   7   54.18    4.07
  -5   1  -7   52.58    4.44
   1   5   7   49.46    4.34
   1   5   7   48.68    3.85
  -1   5  -7   50.35    4.42
  -1  -5  -7   48.65    2.52
   1   5   8    9.34    2.34
   1   5   8    9.21    2.17
  -1   5   8    8.12    1.85
  -5   1  -8    7.00    2.15
  -1   5  -8    5.07    1.72
  -1  -5  -8    6.25    1.05
  -5  -1  -8    6.62    1.78
  -1  -5   8    9.28    2.76
   1   5  -8    5.40    1.77
  -1   5   8   10.28    2.50
   1   5   9   25.49    3.45
   1  -5  -9   21.05    2.67
  -1   5   9   24.91    3.30
  -5   1  -9   23.02    3.32
   1   5  -9   27.28    3.71
  -1   5  -9   26.45    3.75
  -1   5   9   24.45    3.03
   1   5   9   24.76    2.99
  -5  -1  -9   25.22    3.23
  -1  -5  -9   24.21    2.28
   1   5 -10   52.58    5.40
  -1   5  10   51.00    4.37
   1  -5  10   51.82    3.47
   1   5  10   57.22    5.09
  -5  -1 -10   55.83    4.86
  -1   5  10   60.07    5.42
  -1   5 -10   54.90    5.60
  -1  -5 -10   51.11    3.54
  -5   1 -10   54.79    5.33
   1  -5 -10   51.79    4.33
   1   5  10   53.10    4.55
  -1   5  11   48.89    5.14
   1   5 -11   50.64    5.50
  -5   1 -11   46.00    4.91
   5   1  11   49.25    4.93
  -5  -1 -11   46.93    4.55
   1   5  11   50.67    5.18
   1   5  11   45.96    4.46
  -1   5  11   45.83    4.35
   1  -5 -11   44.24    4.12
   1  -5  11   46.83    3.34
  -1   5 -11   51.03    5.43
  -5   1 -12   95.98    7.32
   5  -1  12   92.98    6.76
  -5   1  12   85.28    5.21
   1   5  12   89.70    7.06
   5   1 -12   83.67    8.10
  -1   5  12   90.77    6.37
   1   5 -12   96.43    7.75
  -1   5 -12   96.49    7.71
   1   5  12   89.51    6.32
   1  -5 -12   85.55    5.98
  -1   5  12   94.86    7.46
   5   1  12   92.40    6.90
  -5  -1 -12   93.59    6.78
   1   5  13    3.62    1.92
  -5   1 -13    4.31    2.09
   5  -1  13    3.86    1.93
  -1   5  13    5.69    2.34
   1   5 -13    2.26    2.02
  -5  -1 -13    3.94    1.95
  -1   5 -13    3.89    1.84
   5   1  13    3.60    1.77
   1  -5 -13    4.83    1.90
  -1   5  13    4.39    1.99
   5   1 -13    3.39    2.72
   1   5  13    5.18    2.03
  -5   1 -14  117.90    8.68
   1  -5  14  115.35    4.69
  -1  -5  14  114.89    4.64
  -1   5 -14  115.55    9.19
   5  -1 -14  121.22   10.22
   5   1 -14  123.59   10.29
  -5  -1 -14  122.58    8.35
  -1   5  14  111.90    4.65
   5   1  14  112.50    8.12
   1   5  14  115.85    4.57
   1   5  14  117.48    7.83
   1   5  14  117.39    9.07
  -1   5  14  108.67    7.48
   1   5 -14  118.63    9.64
   5  -1  14  115.27    7.99
  -1   5 -15    3.60    2.12
  -5   1  15    2.11    0.86
   5   1  15    4.26    2.31
   1   5  15    3.32    1.07
   1   5  15    3.21    0.98
   1   5  15    3.53    1.96
   5  -1  15    4.12    2.12
  -1   5  15    2.85    1.02
   5  -1  15    3.12    0.96
   5   1 -15    0.70    2.40
   5  -1 -15    3.29    2.67
   5   1  15    3.08    0.89
   1  -5  15    3.77    1.42
  -5   1 -15    3.20    2.09
   1   5 -15    2.79    2.35
  -5  -1 -15    1.99    1.26
  -1   5  15    2.90    1.86
  -5  -1  15    2.18    0.87
  -1   5  15    3.33    1.12
   1  -5  15    2.87    1.22
  -1  -5  15    2.34    1.05
  -5   1  16   71.36    3.69
   5  -1  16   72.25    3.41
   1  -5  16   72.62    3.84
   5  -1 -16   74.72    8.44
  -1   5  16   67.96    6.33
   1   5  16   72.89    6.67
  -5   1 -16   77.09    7.63
  -1  -5  16   77.40    3.98
   1   5 -16   84.72    8.70
   1   5  16   73.44    3.28
  -1   5 -16   75.70    8.12
   5  -1  16   74.14    6.82
   5   1 -16   74.21    8.65
   1  -5  16   70.57    3.49
  -5  -1 -16   76.94    7.23
  -1  -5  16   72.27    3.63
  -1   5  16   76.54    4.14
  -5  -1  16   67.92    3.49
   1   5  16   72.84    3.97
   5   1  16   69.79    6.71
  -1   5  16   70.97    3.23
   5   1  16   73.12    3.50
   1   5  17    0.89    0.96
   5   1  17    0.16    0.89
   5  -1  17    0.51    1.64
  -1   5  17    0.10    0.76
  -1   5  17    1.00    1.46
  -5   1  17   -0.01    0.81
  -5   1 -17    0.43    1.54
  -1   5 -17   -0.67    1.74
   5   1  17    1.45    1.91
   5   1 -17    1.42    2.55
  -5  -1  17    0.48    0.88
   1  -5  17   -0.26    0.98
   1   5  17   -0.72    1.51
  -1   5  17    1.30    1.11
   1   5  17    0.19    0.95
  -1  -5  17    0.52    0.89
   5  -1 -17    0.61    2.25
   1   5 -17    3.50    2.63
   1  -5  17    0.05    1.23
   5  -1  17    0.65    0.88
   1   5  18   49.90    3.49
  -1   5  18   47.40    5.41
   1   5  18   46.95    5.60
  -1   5 -18   55.16    7.31
  -5   1 -18   48.82    6.39
  -1  -5  18   52.39    3.39
   5   1  18   47.82    3.04
  -5   1  18   47.18    3.19
   5  -1  18   50.39    3.01
   1  -5  18   53.97    3.38
  -1   5  18   52.17    3.62
   5  -1 -18   52.09    7.28
   5   1  18   47.69    5.74
  -5  -1  18   49.40    3.19
  -1   5  18   48.87    2.78
   1   5  18   47.03    2.73
   5  -1  18   44.46    5.49
   1   5 -18   53.77    7.68
   5   1 -18   48.63    7.52
   1   5  19   -0.77    1.95
   1  -5  19    0.16    1.01
  -1   5  19   -0.99    1.28
   5  -1 -19   -2.02    3.28
  -1   5 -19   -0.81    1.95
  -1   5  19    0.80    0.83
  -5  -1  19    1.27    0.96
   5  -1  19    0.76    0.84
   5   1 -19   -0.62    2.39
   1   5 -19    0.73    2.20
  -5   1  19   -0.16    1.04
  -1  -5  19    0.86    0.99
   1   5  19    0.89    0.93
   1   5  19    0.31    1.06
   5   1  19    0.75    0.81
   5   1  19    0.68    1.74
   5  -1  19    0.50    1.59
  -1   5  19   -0.01    1.13
  -5  -1  20  159.12    5.86
  -1   5  20  161.08    4.97
  -1   5  20  182.06    6.92
  -1  -5  20  180.74    6.35
   5  -1  20  168.60    5.76
  -5   1  20  171.55    6.06
   1   5  20  154.43    4.92
   1   5  20  175.20    6.72
   5   1  20  166.70    5.70
   1  -5  20  179.91    6.27
  -1   5  21   10.58    1.36
  -5  -1  21   12.91    1.79
  -1   5  21   13.77    2.01
  -1  -5  21   12.96    1.86
   1   5  21   11.62    1.43
   1   5  21   12.31    1.95
  -5   1  21   11.08    1.69
   5   1  21   11.43    1.65
   5  -1  21   13.16    1.64
   1  -5  21   12.60    1.81
  -1   5  22  170.14    4.77
   1   5  22  186.03    6.71
  -5   1  22  178.77    6.13
   5   1  22  180.49    5.95
  -5  -1  22  173.52    5.87
  -1   5  22  190.98    6.87
  -1  -5  22  187.18    6.21
   1  -5  22  193.15    6.20
   1   5  22  163.73    4.65
   5  -1  22  179.84    5.77
  -1  -5  23   33.27    2.58
   5  -1  23   29.53    2.30
  -5  -1  23   30.80    2.44
   1  -5  23   32.46    2.47
   1   5  23   31.68    2.75
  -1   5  23   31.17    2.80
  -1   5  23   27.49    2.17
   5   1  23   29.54    2.38
  -5   1  23   29.03    2.46
   5   1  24   66.41    3.31
   1   5  24   67.49    3.72
  -1  -5  24   65.50    3.33
  -1   5  24   65.69    3.73
  -5  -1  24   58.76    3.13
   1  -5  24   67.37    3.39
   5  -1  24   61.70    3.11
  -5   1  24   60.00    3.31
  -5  -1  25    4.61    1.03
   5   1  25    4.97    1.10
   5  -1  25    3.15    0.88
  -5   1  25    3.23    0.95
  -1  -5  25    3.81    1.03
   1  -5  25    4.65    1.02
  -1   5  25    2.85    1.05
   1   5  25    3.67    1.03
  -5  -1  26   32.99    1.96
   5  -1  26   37.75    2.04
  -5   1  26   32.26    1.95
   1  -5  26   40.98    2.25
   5   1  26   36.11    2.02
  -1  -5  26   40.15    2.24
   1  -5  27    5.08    0.82
   5  -1  27    4.06    0.63
   5   1  27    3.89    0.67
  -1  -5  27    4.28    0.82
   2  -5   0 1146.47   17.21
   2   5   0 1083.02   13.23
  -5  -2   0 1220.75   19.89
  -2   5   0 1145.14   18.33
  -2   5   0 1184.07   17.97
   2   5   0 1115.73   14.29
  -2  -5   0 1157.67   20.50
   2   5   0 1124.12   19.78
   2  -5  -1  719.28   12.53
  -2   5  -1  786.81   14.51
   2   5   1  767.17   15.48
  -5  -2   1  773.68   15.25
   2   5  -1  759.37    9.76
  -2   5  -1  762.56   14.44
  -5  -2  -1  740.13   15.17
  -2  -5   1  762.48   16.74
   2   5  -1  703.55   11.21
  -5   2   1  677.28    9.23
   2  -5   1  731.62   13.77
  -2   5   1  810.73   14.71
  -2  -5  -1  761.08   15.92
   5   2   1  751.27   11.47
   2   5   1  778.26   11.79
  -2  -5   2  985.59   19.81
  -2  -5  -2 1018.22   18.77
   2  -5   2  968.82   16.88
   2   5   2  978.41   14.55
  -2   5   2  983.54   15.31
  -5  -2  -2  952.68   17.66
  -2   5  -2  967.88   16.95
   2   5   2  940.67   17.59
   2   5  -2  934.09   14.81
  -2   5   2  990.75   16.98
   2  -5  -2  911.72   14.34
  -5   2  -2  984.95   18.44
  -5  -2   2  972.80   17.83
   5   2   2  934.55   13.34
  -5   2  -3  353.06   10.72
   2  -5   3  337.70    9.89
   2  -5  -3  326.19    7.60
   5   2   3  321.08    7.10
  -2   5   3  350.64    8.66
  -5  -2   3  332.27   10.16
   2   5  -3  339.78    9.00
  -2  -5  -3  355.08   10.60
   2   5   3  344.43    8.33
   2   5   3  341.36   10.19
  -2   5  -3  360.71   10.14
  -2  -5   3  332.17   11.27
  -2   5   3  349.72    9.93
  -5   2  -4  140.05    6.75
  -2   5  -4  132.32    6.40
  -2   5   4  133.61    6.23
  -2  -5   4  139.44    7.42
   5   2   4  128.84    4.54
   2   5   4  128.99    5.37
   2  -5   4  122.73    6.06
  -2  -5  -4  124.94    6.44
   2  -5  -4  115.51    4.39
  -5  -2   4  119.75    6.05
   2   5   4  122.07    5.99
   2   5  -4  137.90    6.03
  -2   5   4  124.16    5.38
  -5  -2  -5   15.66    1.95
   2   5   5   16.83    2.24
  -2  -5  -5   21.53    3.45
   5   2   5   17.11    1.83
   2  -5  -5   16.95    1.76
  -2   5  -5   16.87    2.52
  -5  -2   5   17.54    2.44
  -2   5   5   17.40    2.11
   2   5  -5   16.36    2.38
   2   5   5   14.73    2.30
  -2  -5   5   17.25    2.79
  -2   5   5   17.02    2.49
  -5   2  -5   16.28    2.65
   2   5  -6  124.16    6.51
  -2   5   6  123.04    5.69
  -2   5   6  128.91    6.56
   2   5   6  127.61    5.89
  -5  -2  -6  121.87    5.40
   2   5   6  124.57    6.39
  -2   5  -6  125.45    6.66
  -5   2  -6  131.37    6.86
   5   2   6  130.90    5.19
  -2  -5  -6  124.85    6.43
  -2  -5   6  127.01    7.46
  -5  -2   6  128.04    6.58
   2  -5  -6  124.67    4.97
  -2   5  -7  311.36   11.19
  -5   2  -7  314.58   11.36
   2   5   7  312.29    9.96
  -2  -5   7  317.91   12.30
   5   2   7  320.30    9.05
  -2   5   7  324.39   10.98
   2  -5  -7  314.45    8.43
   2   5  -7  335.05   11.86
  -5  -2   7  314.57   10.79
   2   5   7  319.18   10.80
  -2   5   7  302.59    9.64
  -5  -2  -7  304.70    9.26
  -2   5  -8   59.66    5.02
  -2   5   8   72.93    5.41
   2   5   8   68.01    4.81
   2   5  -8   61.82    5.30
  -5  -2   8   68.55    5.11
   2   5   8   66.35    5.16
   2  -5  -8   71.12    4.11
  -2   5   8   69.83    4.82
  -5  -2  -8   62.96    4.35
  -2  -5   8   73.02    6.08
   5   2   8   69.69    4.49
  -5   2  -8   61.07    5.26
  -5  -2  -9  148.43    7.01
  -2   5   9  156.04    7.37
   2   5   9  163.33    8.28
   2   5  -9  153.81    8.74
  -2   5  -9  157.67    8.50
  -2   5   9  163.79    8.58
   5   2   9  161.20    8.13
   5   2   9  152.46    7.12
   2   5   9  160.54    7.66
  -2  -5   9  162.14    9.14
  -5   2  -9  148.79    8.41
  -2   5 -10   10.06    2.41
  -2   5  10   11.77    2.47
   2   5  10   12.85    2.38
   2   5  10   15.08    2.83
   5   2  10   14.21    2.82
   2   5 -10   13.72    2.99
  -5  -2 -10   12.27    2.29
  -5   2  10   11.24    1.99
  -5   2 -10   11.39    2.58
  -2   5  10   15.52    3.06
   5   2  11  203.42    9.99
  -2   5  11  200.61    9.07
  -5  -2 -11  203.95    9.16
  -5   2 -11  199.70   10.42
  -5   2  11  194.90    8.03
  -2   5 -11  202.54   10.81
   2   5  11  214.84   10.52
   2   5  11  207.75    9.46
   2  -5 -11  208.81    9.95
  -2   5  11  218.96   11.00
   2   5 -11  226.58   11.79
  -5   2  12   37.01    3.71
  -2   5  12   43.19    5.15
  -5   2 -12   34.00    4.66
  -2   5  12   39.59    4.18
   5   2 -12   38.82    5.70
   2  -5  12   35.01    3.40
   2  -5 -12   37.80    4.48
   2   5  12   42.04    4.95
   2   5 -12   36.62    5.09
   2   5  12   38.37    4.39
  -5  -2 -12   37.20    4.13
   5   2  12   38.46    4.64
  -2   5 -12   35.20    4.78
   2   5  13  249.09   11.37
  -5   2  13  234.74    9.34
   2   5 -13  247.67   13.55
  -2   5  13  232.05   10.56
  -5  -2 -13  254.95   11.14
   5   2 -13  238.56   14.13
   5   2  13  232.95   11.50
  -5   2 -13  254.36   12.77
   2  -5 -13  249.85   11.46
  -2   5 -13  234.28   12.65
  -2   5  13  239.46   12.80
   2   5  13  249.87   12.60
   5  -2  13  246.19   11.49
   2   5  14   -0.80    1.31
   5  -2  14    0.12    1.26
   5  -2 -14    0.07    2.06
  -2   5  14    0.65    0.84
   5   2 -14    0.68    2.13
   2  -5  14    0.80    0.86
  -5   2 -14    0.66    1.57
   2  -5 -14   -0.57    1.34
  -5  -2 -14    0.24    1.34
  -5   2  14    0.30    1.13
  -2   5 -14    1.83    2.01
  -2  -5  14    0.15    0.80
  -2   5  14    0.46    1.13
   2   5 -14    1.78    2.01
   2   5  14    0.31    1.66
   5   2  14   -0.05    1.70
   2   5  14    0.50    0.69
   5   2  15  140.37    4.75
  -5   2  15  140.53    5.12
  -2  -5  15  137.76    5.37
   2   5  15  142.69    9.18
  -2   5  15  140.61    4.44
   5  -2  15  139.44    8.98
  -5   2 -15  150.07   10.67
   5   2 -15  157.47   12.08
  -5   2  15  127.36    4.31
   5  -2  15  142.32    4.70
   2  -5  15  147.03    5.37
   5  -2 -15  147.09   11.58
  -2   5 -15  151.24   11.06
   2  -5  15  141.32    4.94
   2   5  15  139.25    5.33
  -2   5  15  138.44    8.57
  -2   5  15  153.08    5.69
   5   2  15  143.27    9.56
   2   5  15  135.05    4.46
  -5  -2  15  133.22    4.82
   2   5 -15  147.36   11.31
  -2  -5  16   13.75    1.77
   5  -2  16   14.70    1.67
  -5   2 -16   13.14    3.54
  -2   5  16   13.29    1.53
   5   2  16   12.44    1.33
  -2   5 -16   17.89    4.12
   5   2  16   13.12    3.22
  -2   5  16   14.05    1.93
   2   5  16   13.56    1.56
  -5   2  16   12.42    1.67
   2   5  16   14.51    1.91
  -5  -2  16   12.95    1.62
   2  -5  16   14.01    1.97
   2   5 -16   13.18    4.07
   5  -2 -16   16.13    4.63
   2   5  16   15.97    3.38
   5   2  16   12.77    1.61
  -5   2  16   11.89    1.90
   5   2 -16   14.12    4.04
   2  -5  16   14.32    1.84
   5  -2  16   12.98    3.01
  -2   5  16   13.75    2.96
   5   2 -17  144.34   12.43
   5  -2  17  128.93    4.79
  -5   2 -17  127.78   10.35
   5   2  17  131.72    4.91
  -5   2  17  116.36    4.50
   5   2  17  132.77    9.56
  -2   5  17  122.82    4.39
  -2   5 -17  123.03   10.57
   2  -5  17  137.75    5.31
   2   5  17  125.83    9.07
   5  -2 -17  136.98   11.64
   2   5  17  119.17    4.32
  -5   2  17  132.00    5.25
  -2   5  17  123.39    8.46
   5  -2  17  125.59    8.91
  -2   5  17  132.78    5.72
  -5  -2  17  131.98    5.06
   2   5  17  130.54    5.47
  -2  -5  17  131.69    5.35
   2   5 -17  138.00   11.40
   5   2 -18   -1.30    2.38
   2   5  18    0.02    0.86
   5  -2  18    0.81    1.34
   2  -5  18    0.92    0.98
  -2   5 -18   -2.00    2.28
   2   5  18    1.09    1.09
  -2   5  18    1.11    1.13
  -2  -5  18    1.00    0.94
   2   5  18    1.95    1.59
   5  -2 -18    0.01    1.81
   5   2  18    0.13    0.77
  -5  -2  18   -0.12    0.75
  -2   5  18    0.60    0.84
   2   5 -18    2.61    2.47
  -2   5  18    1.29    1.53
  -5   2 -18    2.46    2.63
  -5   2  18   -0.22    0.84
   5   2  18    0.50    1.33
   5  -2  18    0.12    0.76
   5   2  19   32.19    2.51
  -5  -2  19   31.34    2.55
  -5   2  19   32.31    2.69
  -2   5  19   31.19    2.98
  -2   5  19   28.86    2.19
   2   5  19   34.22    2.95
   5  -2  19   30.42    2.39
   2  -5  19   34.80    2.74
  -2   5  19   30.02    4.36
   2   5  19   30.84    2.19
  -2  -5  19   30.89    2.68
   5  -2  20   73.57    3.70
  -5   2  20   72.76    4.08
  -2  -5  20   74.41    4.11
   2  -5  20   75.51    4.09
  -2   5  20   81.25    4.64
  -2   5  20   71.82    3.38
   2   5  20   75.50    4.47
   2   5  20   71.65    3.30
   5   2  20   72.98    3.87
  -5  -2  20   72.94    3.89
   5   2  21    1.56    0.97
  -5  -2  21    2.52    1.07
   2  -5  21    1.43    0.88
  -2   5  21    2.72    1.28
  -2   5  21    2.94    1.36
   2   5  21    2.19    0.96
  -5   2  21    1.46    1.18
  -2  -5  21    1.99    1.12
   2   5  21    1.60    1.18
   5  -2  21    3.52    1.10
  -2  -5  22    0.44    1.00
   2   5  22   -0.57    0.77
  -2   5  22    0.08    1.11
   5  -2  22    1.54    0.96
  -2   5  22   -1.32    1.53
  -5   2  22    0.38    0.94
   2  -5  22    1.14    1.10
  -5  -2  22   -0.18    0.83
   2   5  22    0.19    1.22
   5   2  22    0.35    0.90
  -5   2  23   52.28    3.21
   5  -2  23   53.72    2.97
  -2  -5  23   54.48    3.27
  -5  -2  23   51.41    3.05
   2   5  23   53.97    3.40
  -2   5  23   55.36    3.60
   5   2  23   57.00    3.22
  -2   5  23   44.63    2.83
   2  -5  23   56.52    3.26
   5  -2  24    5.48    1.13
  -5  -2  24    6.27    1.15
  -5   2  24    6.19    1.19
   2  -5  24    6.86    1.32
   2   5  24    6.92    1.38
  -2   5  24    4.50    1.16
   5   2  24    5.85    1.17
  -2  -5  24    5.74    1.24
   2  -5  25   53.77    2.77
   5  -2  25   49.50    2.55
  -2  -5  25   53.14    2.76
  -2   5  25   51.15    3.04
   2   5  25   51.19    2.96
  -5  -2  25   46.69    2.53
  -5   2  25   48.23    2.65
   5   2  25   49.09    2.54
  -2  -5  26    2.13    0.76
   5   2  26    1.13    0.66
   5  -2  26    1.55    0.68
  -5   2  26    1.31    0.67
   2  -5  26    2.14    0.74
  -5  -2  26    1.49    0.65
  -2  -5  27   49.99    2.15
   2  -5  27   51.31    2.17
   3   5   0  607.97    9.54
  -5  -3   0  653.41   14.92
   3   5   0  585.03    8.97
  -3  -5   0  637.08   15.40
   3   5   0  615.93   13.97
  -3   5   0  629.64   12.36
  -3   5   0  653.92   13.79
  -5   3   0  620.26    8.94
   3  -5   0  583.29   10.91
   3  -5  -1   17.75    1.76
  -3   5   1   21.46    2.44
   3   5  -1   22.82    1.43
  -3  -5  -1   22.11    3.08
  -3  -5   1   22.33    3.40
   3  -5   1   18.56    2.11
  -3   5  -1   23.58    2.88
  -5  -3  -1   19.00    2.91
  -5  -3   1   18.92    2.95
  -3   5  -1   19.97    2.40
   5   3   1   18.19    2.05
  -5   3   1   18.20    1.62
  -5   3  -1   16.78    1.18
   3   5   1   18.85    1.85
   3   5   1   18.64    2.63
   3   5  -1   19.62    1.86
   3  -5  -2   81.75    3.11
  -5  -3   2   85.20    5.37
  -5   3  -2   81.09    2.33
  -5   3   2   92.92    3.82
  -5   3  -2   92.24    5.38
  -3   5  -2   93.53    5.19
  -3  -5   2   93.04    5.89
   3   5   2   84.60    4.88
  -5  -3  -2   92.51    5.40
   5   3   2   90.47    4.03
  -3   5  -2   91.50    4.52
  -3  -5  -2   82.05    5.37
  -3   5   2   89.71    4.60
   3   5  -2   89.17    4.16
   3   5   2   86.21    3.86
  -5   3   3   81.32    4.04
  -5   3  -3   74.57    2.41
   3  -5  -3   65.44    2.62
  -3  -5   3   81.15    5.87
  -3   5  -3   78.48    4.97
  -5  -3  -3   77.31    5.21
  -5   3  -3   78.96    5.45
   3   5  -3   74.50    4.21
   3   5   3   83.98    4.15
   3   5   3   84.15    4.90
  -5  -3   3   77.53    5.27
  -3  -5  -3   76.79    5.37
  -3   5   3   83.81    4.74
   5   3   3   74.24    3.83
  -3  -5  -4  364.19   11.41
   3   5  -4  311.58    9.54
   3  -5  -4  280.78    5.87
  -5   3  -4  338.26   11.19
  -3   5  -4  336.95   10.69
   3   5   4  342.02    8.93
  -5  -3   4  324.40   10.89
  -3   5   4  318.85    8.90
  -5   3   4  335.14    8.82
   3   5   4  325.83    9.86
   5   3   4  310.31    8.08
  -3  -5   4  335.09   11.82
  -3   5   4  332.18    9.75
  -3   5   5   75.11    4.82
  -5   3   5   76.62    4.61
   3   5  -5   73.83    4.91
  -5   3  -5   75.97    5.48
   5   3   5   75.19    4.10
   3   5   5   75.55    4.87
  -3   5  -5   77.41    5.37
  -3  -5   5   77.67    5.84
  -3   5   5   71.00    4.33
  -3  -5  -5   76.53    5.18
  -5  -3   5   77.41    5.43
   3   5   5   81.11    4.56
   3  -5  -5   63.23    2.68
  -3   5   6  219.61    8.48
  -5   3   6  194.91    7.83
  -5  -3  -6  183.23    6.07
  -5   3  -6  193.26    8.95
   3  -5  -6  182.38    5.07
   5   3   6  191.29    6.87
  -3   5  -6  203.89    9.00
   3   5   6  206.83    7.76
  -5  -3   6  204.15    9.00
   3   5  -6  197.19    8.41
  -3   5   6  196.77    7.45
  -3  -5   6  214.57   10.06
  -3  -5  -6  200.64    8.64
   3   5   6  198.87    8.17
  -5   3  -7    1.48    1.94
   5   3   7    1.02    1.74
  -3   5  -7    1.02    1.58
  -3  -5   7    2.41    2.38
  -3   5   7    1.65    1.58
   5   3   7    2.13    1.36
   3   5   7    3.03    1.86
   3   5  -7    1.48    1.49
  -3   5   7    3.03    1.96
  -5  -3  -7   -0.35    0.85
   3  -5  -7    0.23    0.59
   3   5   7    3.60    1.80
  -5  -3   7   -0.02    1.45
  -5  -3   8   50.82    4.85
   5   3   8   50.98    3.94
  -5  -3  -8   48.38    3.52
  -3   5   8   52.61    4.68
  -3  -5   8   51.83    5.27
   3   5  -8   49.89    4.97
  -3   5  -8   45.48    4.92
  -5   3  -8   48.20    5.04
   5   3   8   55.46    4.67
  -3   5   8   45.05    3.78
   3   5   8   51.14    4.22
   3  -5  -8   44.91    2.94
   3   5   8   47.07    4.35
  -3   5   9    1.21    1.23
   3   5  -9    9.66    3.80
   5   3   9    2.88    1.46
   3   5   9    2.65    1.51
  -3  -5   9    2.47    2.33
  -5  -3  -9    3.24    1.41
   3   5   9    1.52    1.56
  -5   3  -9    5.53    2.93
  -5  -3   9    1.35    1.53
  -3   5   9    2.45    2.00
   5   3   9    2.86    2.01
  -3   5  -9    2.28    2.57
   3   5  10   10.08    2.41
   5   3  10   10.59    2.31
   5   3 -10   10.16    3.20
  -3   5  10   10.23    2.49
  -5   3 -10    8.19    2.47
  -5   3  10    9.85    2.10
   3   5  10    9.35    2.54
   3   5 -10   10.81    2.74
  -3   5  10   11.12    2.22
  -3   5 -10    7.36    2.33
   5   3  10   11.12    2.52
  -5  -3 -10   10.12    2.02
  -5  -3 -11    1.96    1.44
   3   5  11    3.00    1.85
  -3   5  11    2.19    1.65
  -3   5 -11    2.02    2.10
   3   5  11    1.97    1.75
   5   3 -11    1.21    2.26
   3   5 -11    3.73    2.78
   5   3  11    3.85    2.09
  -3   5  11    2.41    2.13
  -5   3 -11    1.41    2.13
  -5   3  11    2.35    1.65
   3   5  12   73.71    6.06
   5   3  12   79.64    6.61
  -5   3  12   71.50    5.28
   5   3 -12   77.57    7.79
   3   5  12   76.72    6.57
   3   5 -12   76.32    7.34
  -5   3 -12   81.75    7.17
  -3   5  12   75.07    6.91
  -3   5 -12   80.04    7.20
  -3   5  12   72.94    5.58
  -3   5 -13   18.92    3.79
   5   3  13   19.40    3.65
  -5   3  13   17.79    2.80
   3   5  13   20.67    3.84
  -5   3 -13   19.44    4.05
   3   5  13   19.69    3.44
   5   3 -13   17.87    4.32
   3   5 -13   20.50    4.29
   3  -5 -13   20.71    3.57
  -3   5  13   16.59    3.01
   3  -5  13   17.32    2.77
   3  -5  14   64.94    3.43
  -5   3 -14   63.30    6.78
   3   5  14   59.37    2.83
   5  -3  14   64.49    6.07
   5   3 -14   63.11    7.51
  -3   5  14   59.54    2.83
  -3  -5  14   58.86    3.38
   3   5  14   59.99    3.25
   3   5  14   61.08    6.43
  -3   5  14   57.91    5.27
   3   5 -14   65.96    7.43
  -3   5 -14   63.07    6.90
   3  -5 -14   62.90    6.35
  -5   3  14   59.03    5.06
   5  -3 -14   65.05    7.57
  -3   5  14   61.33    3.50
   3  -5  14   63.98    3.17
   5   3  14   63.22    6.09
   3   5  14   58.52    5.84
   3   5  15   61.39    3.03
  -5   3  15   64.53    3.48
  -5  -3  15   58.75    3.23
  -3  -5  15   64.39    3.59
   5  -3  15   63.30    6.17
   5   3  15   60.51    3.13
   3   5  15   62.05    6.35
   3   5 -15   64.01    7.50
   3  -5  15   62.98    3.47
   3  -5 -15   61.51    6.41
   5  -3 -15   68.62    8.00
  -5   3 -15   61.13    7.07
   5   3 -15   58.68    7.67
   5   3  15   62.13    2.90
  -3   5  15   68.53    3.91
   5  -3  15   62.93    3.17
  -3   5 -15   61.69    7.27
  -3   5  15   63.76    5.79
   3   5  15   64.21    3.53
  -5   3  15   61.22    3.11
  -3   5  15   61.61    3.02
   5   3  15   70.04    6.68
  -3  -5  16  153.41    5.66
  -5   3  16  151.67    4.95
   3   5  16  152.69    4.85
  -3   5 -16  145.25   11.24
   3   5  16  153.00    5.72
   5  -3  16  161.40    5.30
  -3   5  16  149.54    4.82
  -3   5  16  168.09    6.19
   3   5  16  157.32   10.28
   5  -3  16  151.52    9.48
  -5   3  16  161.77    5.72
   3   5 -16  166.06   12.36
   5   3 -16  153.95   12.53
   5  -3 -16  170.98   12.71
  -5  -3  16  145.12    5.29
   5   3  16  153.91    4.67
  -5   3 -16  154.30   11.22
   5   3  16  158.71   10.47
   5   3  16  150.18    5.15
   3  -5  16  165.80    5.67
  -3   5  16  145.08    9.00
   5   3  17   10.61    1.64
  -3   5  17   11.32    1.84
   5  -3  17   10.38    2.72
  -5   3  17   10.15    2.06
   3   5  17   11.07    3.00
  -3   5  17   10.76    1.56
   3  -5  17   11.07    1.64
   5   3  17    9.43    2.76
   3   5 -17   10.72    3.83
  -5  -3  17    9.06    1.45
   5   3 -17   12.66    4.23
  -3   5 -17    9.73    3.05
   5  -3  17    9.51    1.48
   5  -3 -17   10.55    3.45
  -5   3 -17    9.90    3.55
   3   5  17   10.52    1.85
  -5   3  17   10.55    1.72
   3   5  17    9.59    1.45
   5   3  17   11.03    1.41
  -3   5  17    9.31    2.57
  -3  -5  17   11.47    1.78
   5   3  18  226.60    5.82
  -3   5  18  211.68   11.19
   3   5  18  224.50    6.04
  -3   5  18  248.75    8.03
   5   3 -18  249.60   16.99
   3   5  18  223.30   12.73
  -3  -5  18  229.38    7.10
  -5  -3  18  223.70    6.80
  -5   3  18  231.52    7.37
  -5   3  18  206.71    5.90
  -3   5 -18  219.21   14.58
   3   5  18  233.57    7.47
   3   5 -18  230.83   15.61
   5  -3  18  230.95    6.64
   3  -5  18  234.97    7.02
  -3   5  18  229.06    6.09
  -5   3 -18  224.37   14.23
   5   3  18  228.77    6.80
   5  -3 -18  216.51   14.89
   5   3  18  209.06   12.42
  -5   3  19    0.28    2.63
  -3   5  19    0.21    1.10
   3  -5  19   -0.19    0.87
   5  -3  19   -0.28    0.78
   5   3  19    0.26    0.78
  -3   5  19   -0.19    1.24
  -5   3  19    0.46    1.10
  -5  -3  19    0.39    0.86
   3   5  19    0.07    0.97
  -3  -5  19    0.98    1.14
   5   3  19   -0.28    1.04
   3   5  19    0.64    0.81
   5  -3  20  128.68    4.91
  -5   3  20  124.18    5.08
  -3   5  20  123.76    4.49
   3   5  20  125.44    5.49
  -5  -3  20  118.65    4.91
   5   3  20  123.87    5.16
  -5   3  20  126.59    5.55
   3  -5  20  132.69    5.26
  -3  -5  20  133.91    5.32
   3   5  20  121.29    4.28
  -3   5  20  135.36    5.97
  -5  -3  21    7.34    1.37
  -3   5  21    7.37    1.68
   5   3  21    8.52    1.55
  -3   5  21    8.21    2.00
   3   5  21    7.53    1.20
  -3  -5  21    8.30    1.57
   3   5  21    7.80    1.65
   3  -5  21    7.10    1.38
  -5   3  21    7.33    1.50
   5  -3  21    8.26    1.36
   3   5  22  106.86    4.91
  -3   5  22  104.53    5.04
   3   5  22   98.33    3.43
   3  -5  22  112.91    4.54
   5  -3  22  101.70    4.26
  -5   3  22  104.94    4.72
  -3  -5  22  107.64    4.61
  -5  -3  22  100.27    4.38
  -3   5  22   97.39    4.01
   5   3  22  104.12    4.49
  -3  -5  23    4.01    1.19
  -5   3  23    2.88    1.07
  -5  -3  23    3.26    0.99
   5   3  23    1.88    0.88
   5  -3  23    3.00    0.94
  -3   5  23    3.41    1.16
  -3   5  23    1.38    2.30
   3   5  23    4.01    1.24
   3  -5  23    3.97    1.11
  -3   5  24   45.12    3.04
   3   5  24   46.26    2.92
  -5  -3  24   43.76    2.56
   5  -3  24   44.26    2.47
  -3  -5  24   48.06    2.82
   3  -5  24   48.33    2.74
  -5   3  24   41.69    2.64
   5   3  24   44.67    2.65
  -5   3  25    0.80    0.69
   3   5  25    0.84    0.83
   5  -3  25    1.65    0.75
  -5  -3  25    1.41    0.74
  -3   5  25    0.45    0.82
  -3  -5  25    0.75    0.72
   3  -5  25    0.71    0.70
   5   3  25    0.35    0.65
   3  -5  26   18.11    1.43
   5  -3  26   15.83    1.29
  -3  -5  26   17.83    1.46
  -5  -3  26   17.35    1.38
  -3  -5  27    2.23    0.57
   3  -5  27    2.99    0.62
  -5   4   0  187.61    5.27
   4   5   0  191.99    7.53
  -4   5   0  187.00    6.27
   5   4   0  184.66    6.89
  -5  -4   0  185.01    8.30
   4   5   0  182.95    5.05
  -4  -5   0  200.39    8.80
  -4   5  -1    3.44    1.48
   4   5   1    2.12    0.53
  -5   4  -1    2.10    0.59
  -4   5  -1    3.48    1.09
   4   5   1    2.27    1.32
   4   5  -1    3.37    0.64
  -4  -5  -1    4.03    1.73
  -5   4   1    2.24    0.86
  -5  -4   1    2.81    1.86
   4   5   1    2.59    0.88
   5   4   1    1.62    0.92
  -5   4  -1    3.79    2.08
  -5  -4  -1    4.20    2.40
  -4   5   1    3.06    1.05
  -4  -5   1    4.18    2.03
  -4  -5  -2  153.40    7.90
   5   4   2  145.05    5.88
  -5  -4   2  143.63    7.72
   4   5   2  171.01    5.86
  -4   5   2  148.83    5.99
  -5   4   2  153.77    5.40
  -5   4  -2  150.93    4.34
   4   5  -2  117.34    2.50
  -4   5  -2  154.81    7.26
  -5   4  -2  190.72    8.66
  -4   5  -2  150.47    5.54
   4   5   2  151.06    6.63
  -5  -4  -2  147.77    7.77
   4   5  -2  137.68    5.82
  -4  -5   2  154.80    8.27
   4   5   3  232.14    8.19
  -4   5   3  244.36    7.88
   5   4   3  242.48    7.73
  -4   5  -3  232.03    7.12
  -5  -4   3  248.89   10.07
  -5   4  -3  239.79    9.47
  -4   5  -3  243.71    9.45
  -4  -5  -3  231.59    9.50
  -5  -4  -3  234.51    9.46
   4   5  -3  234.04    8.14
  -5   4  -3  241.34    5.67
   5   4   3  229.68    7.37
   4   5   3  252.50    7.54
  -4  -5   3  234.50   10.33
  -5   4   3  253.35    7.36
  -4  -5  -4    4.90    2.08
  -4  -5   4    5.10    2.18
  -5  -4  -4    4.01    1.73
  -5   4  -4    4.75    1.96
   4   5   4    5.55    1.48
  -5  -4   4    4.55    2.14
   5   4   4    4.58    1.41
   4   5   4    5.00    1.65
   5   4   4    7.57    1.72
  -4   5   4    6.22    1.67
  -5   4   4    5.26    1.55
   4   5  -4    4.21    1.61
  -5   4  -4    5.89    1.14
  -4   5  -4    5.74    2.00
   4   5   5  133.23    6.27
  -5   4   5  128.85    6.02
  -4  -5   5  128.16    7.81
  -4  -5  -5  123.33    6.83
  -5  -4   5  122.05    7.36
   4   5   5  117.32    6.10
   5   4   5  128.59    6.14
  -5   4  -5  115.21    7.23
   5   4   5  128.33    5.83
   4   5  -5  123.38    6.81
  -5  -4  -5  119.00    6.98
  -4   5   5  127.27    6.26
  -4   5  -5  122.95    7.16
  -4   5   6    3.47    1.48
   4   5   6    3.51    1.58
  -5   4   6    1.57    1.27
   5   4   6    2.75    1.27
  -4  -5   6    4.11    2.28
   5   4   6    3.32    1.44
  -5   4  -6    2.31    1.79
  -5  -4   6    3.87    1.93
   4   5  -6    2.52    1.68
  -4   5   6    2.40    1.64
  -4  -5  -6    2.79    2.00
  -4   5  -6    2.42    1.86
   4   5   6    4.00    1.59
  -4   5  -7  735.04   18.83
  -4  -5  -7  763.60   18.59
  -4   5   7  755.66   17.55
  -5   4  -7  725.77   18.96
   5   4   7  754.88   16.99
   4   5   7  765.88   17.11
  -5  -4   7  760.73   19.90
   4   5  -7  724.07   18.65
   4   5   7  748.62   17.12
  -5   4   7  741.32   17.33
  -4   5   7  705.12   15.69
   5   4   7  722.33   15.86
  -4  -5   7  731.39   20.12
   5   4   8   62.05    4.63
   4   5  -8   62.42    5.63
  -4   5  -8   63.42    5.75
   5   4   8   66.69    5.10
  -5  -4   8   64.24    5.78
  -4  -5   8   67.96    6.17
   4   5   8   66.20    5.13
  -4   5   8   59.64    4.67
  -5   4  -8   61.44    5.64
  -5   4   8   66.67    5.38
   4   5   8   66.44    5.15
  -4   5   8   65.59    5.36
  -4   5  -9  198.96   10.35
   4   5   9  217.63    9.64
   5   4   9  214.08    9.13
  -4   5   9  217.76   10.23
   4   5   9  219.65    9.41
   4   5  -9  201.08   10.47
   5   4  -9  219.56   11.64
  -4  -5   9  213.34   11.19
  -5   4  -9  203.42   10.69
   5   4   9  219.26    9.70
  -5  -4   9  223.61   10.98
  -4   5   9  206.89    8.65
  -4   5  10   30.84    3.63
   5   4  10   35.44    4.01
   4   5 -10   33.05    4.73
   5   4 -10   37.87    5.29
  -4  -5  10   32.89    4.54
   5   4  10   36.10    4.15
   4   5  10   32.79    3.94
  -5   4  10   30.50    3.44
  -5   4 -10   36.58    4.79
  -4   5  10   36.34    4.37
   4   5  10   31.90    3.91
  -4   5 -10   35.78    4.56
   4   5  11  114.80    7.64
  -5   4 -11  105.58    8.20
  -4   5 -11  106.60    8.21
   5   4  11  116.34    7.68
  -4   5  11  104.40    7.92
   5   4  11  113.68    7.29
   5   4 -11  107.98    8.67
   4   5  11  105.08    7.21
   4   5 -11  106.59    8.40
  -5   4  11   98.59    6.25
  -4   5  11   97.82    6.38
   5   4 -12   71.81    7.53
   5   4  12   79.02    6.51
  -4   5 -12   69.75    6.90
   4   5 -12   78.74    7.56
  -5   4  12   71.66    5.46
   4   5  12   74.16    6.55
   4   5  12   76.28    6.48
  -5   4 -12   72.39    7.12
   5   4  12   78.38    6.54
  -4   5  12   72.27    5.65
  -5   4  13  110.65    7.03
   5   4  13  120.92    8.40
   4   5  13  115.20    8.14
   5   4 -13  114.99    9.66
  -4   5  13  107.18    7.07
   4   5  13  110.65    8.34
  -5   4 -13  115.82    9.22
   4   5 -13  114.00    9.69
  -4   5  14    1.52    0.76
   4  -5 -14    1.58    1.30
  -4   5 -14    0.11    1.85
   5  -4 -14    1.09    1.89
   5   4 -14    1.07    2.11
   4   5  14    1.26    0.75
   4  -5  14    1.37    0.76
   5   4 -14    1.16    0.64
   5   4  14    1.04    0.80
   4   5 -14    1.16    0.65
  -5   4  14    1.27    0.91
   5  -4  14    2.23    0.81
  -5  -4  14    0.51    0.64
  -4   5  14    1.47    1.24
  -4  -5  14    1.27    0.92
  -5   4  14    2.26    0.92
  -4   5  14    0.82    0.75
   4   5  14    2.74    1.87
  -5   4 -14    1.34    1.83
   5   4  14    1.49    1.63
   5   4  14    0.74    0.67
   4   5 -14    1.10    2.22
   4  -5  14   -0.09    1.06
   5  -4  14    1.49    1.50
   4   5  14    0.72    0.72
  -5   4  14    1.23    1.14
   4   5 -15   54.33    2.75
  -5   4  15   64.43    3.66
   4   5  15   60.88    6.35
   5  -4 -15   62.89    7.52
  -5  -4  15   57.80    3.25
  -4   5 -15   62.57    7.46
   4  -5 -15   66.31    7.13
   4  -5  15   61.16    3.36
  -5   4  15   62.51    3.16
   4   5  15   59.82    2.95
   4   5  15   59.78    3.45
   5  -4  15   60.50    3.16
  -4   5  15   65.60    3.87
   5  -4  15   59.06    5.93
  -4   5  15   59.65    3.10
   4   5 -15   71.55    8.26
   5   4 -15   64.05    7.83
   5   4  15   59.99    2.95
  -4   5  15   56.12    5.51
   5   4 -15   56.98    2.76
   5   4  15   63.24    3.33
   5   4  15   66.45    6.80
  -5   4 -15   66.93    7.45
  -4  -5  15   59.51    3.44
   4   5  16    4.55    2.04
   5   4  16    5.43    1.18
   5   4 -16    8.25    3.73
  -5   4  16    5.95    1.36
   5   4  16    7.96    2.51
   4   5  16    4.30    1.13
  -5  -4  16    5.30    1.13
   5   4 -16    6.23    1.18
  -4  -5  16    5.48    1.33
   4   5  16    5.13    1.08
  -5   4 -16    9.02    3.40
  -4   5  16    4.94    1.19
   5  -4 -16    6.15    2.83
   5  -4  16    6.26    1.24
   4  -5  16    6.09    1.25
   5  -4  16    5.40    1.95
   5   4  16    5.35    1.09
  -4   5  16    6.08    1.47
   4   5 -16    7.08    1.33
   4   5 -16    5.19    3.24
  -4   5  16    4.07    1.72
  -5   4  16    6.09    1.68
  -4   5 -16    5.25    2.68
  -4   5  17    7.88    1.69
   4   5  17    6.47    1.21
  -4   5  17    4.79    1.89
   4   5  17    8.37    1.56
  -5   4  17    7.43    1.56
   4  -5  17    7.87    1.42
   4   5  17    6.17    2.29
  -5   4 -17    4.64    2.12
  -4   5 -17    8.38    3.58
   4   5 -17    3.82    2.29
   5   4 -17    7.61    3.18
  -4   5  17    6.38    1.44
   5   4  17    6.60    1.26
  -4  -5  17    7.27    1.41
   5   4  17    6.57    1.39
   5   4  17    6.26    2.12
  -5  -4  17    7.85    1.42
  -5   4  17    5.57    1.76
   5  -4  17    7.48    1.30
   5  -4 -17    4.15    2.24
  -4  -5  18   49.77    3.21
  -4   5  18   52.47    3.68
  -5  -4  18   48.55    3.15
   4   5  18   48.43    2.83
  -5   4 -18   46.09    7.05
   5   4  18   46.79    2.68
   4   5 -18   45.88    7.21
  -4   5  18   47.34    2.97
   5   4 -18   45.35    7.26
   4  -5  18   48.80    3.14
   4   5  18   48.48    5.98
  -5   4  18   51.58    3.54
  -4   5 -18   47.39    6.76
   5  -4  18   49.75    3.08
   4   5  18   51.14    3.46
   5   4  18   46.24    5.95
  -5   4  18   46.52    3.34
   5   4  18   49.58    3.23
  -4   5  18   43.29    4.99
  -4   5  19    0.07    1.51
   5  -4  19    1.08    0.85
   4  -5  19    0.37    0.81
   4   5  19    0.75    0.81
  -5  -4  19   -0.08    0.86
  -5   4  19    1.03    0.93
  -4  -5  19    1.74    1.20
  -4   5  19    0.63    1.29
   5   4  19    1.03    1.08
  -5   4  19    3.14    2.76
   4   5  19    1.10    1.09
   5   4  19    0.55    0.77
   5   4  20    1.56    0.84
   4  -5  20    0.79    0.91
  -4   5  20    0.70    2.04
  -4   5  20    0.77    1.05
   4   5  20    0.67    0.82
   4   5  20    1.08    1.15
   5  -4  20    1.24    0.77
  -5   4  20    1.67    1.15
  -4  -5  20    1.24    0.99
  -5  -4  20    1.94    0.98
   5   4  20    1.95    1.08
  -5   4  20    3.32    2.89
   4  -5  21    3.95    1.20
   4   5  21    5.05    1.41
  -5  -4  21    3.22    1.06
  -5   4  21    0.39    2.87
   5   4  21    3.98    0.90
  -4  -5  21    3.36    1.11
  -4   5  21    3.83    2.51
   5  -4  21    4.00    1.10
   4   5  21    3.73    0.96
   5   4  21    4.04    1.18
  -5   4  21    3.31    1.16
  -4   5  21    2.78    1.19
  -4   5  22   16.52    2.93
  -4   5  22   19.38    2.26
  -5  -4  22   18.40    1.91
   4   5  22   16.58    2.04
   4   5  22   16.25    1.42
   4  -5  22   19.51    2.01
  -5   4  22   18.44    2.15
   5   4  22   17.04    1.95
   5  -4  22   18.43    1.81
  -4  -5  22   21.77    2.10
  -4  -5  23    2.24    0.91
  -4   5  23    2.71    1.23
   4   5  23    2.21    0.93
  -5   4  23    1.70    0.90
   4  -5  23    2.79    1.00
   5   4  23    2.10    0.90
  -5  -4  23    1.40    0.82
   5  -4  23    1.68    0.86
  -5   4  24    0.31    0.78
  -5  -4  24    0.47    0.69
   4  -5  24    0.19    0.76
   5   4  24   -0.19    0.73
  -4   5  24   -0.01    0.88
  -4  -5  24   -0.10    0.75
   4   5  24    1.43    0.91
   5  -4  24    0.41    0.63
   5  -4  25   30.06    1.87
   4  -5  25   32.75    1.98
  -4  -5  25   29.88    1.93
  -5  -4  25   29.56    1.90
  -4  -5  26   -0.09    0.56
   4  -5  26    0.64    0.54
  -5  -4  26   -0.12    0.51
   5  -4  26    0.44    0.49
  -5   5   0  263.23    7.17
   5   5   0  247.51    8.73
   5   5   0  252.90    6.38
  -5  -5   0  236.26   10.21
  -5  -5   1    1.70    2.17
  -5   5  -1    0.89    1.27
  -5   5   1   -0.21    0.85
  -5   5  -1    0.09    0.67
   5   5   1    1.14    1.06
   5   5   1   -0.24    0.66
   5   5  -1    0.26    0.44
  -5  -5  -1    0.15    1.63
  -5   5  -2  424.94   13.14
  -5   5   2  438.46   10.23
  -5   5  -2  418.52    8.97
   5   5   2  445.59   10.00
   5   5   2  406.73   11.07
  -5  -5   2  437.98   14.22
  -5  -5  -2  431.71   13.56
  -5   5  -3    0.28    0.70
  -5   5   3   -0.75    1.10
  -5  -5  -3   -0.99    1.93
   5   5   3   -0.43    1.01
  -5  -5   3   -2.52    2.40
   5   5   3    0.26    1.10
  -5   5  -3    0.45    1.46
  -5   5  -4  680.83   17.79
   5   5   4  608.11   14.24
  -5  -5   4  648.65   18.40
  -5  -5  -4  632.86   17.09
   5   5   4  652.36   14.06
  -5   5   4  670.33   14.49
  -5   5  -4  628.48   12.08
   5   5   5    0.22    1.23
   5   5   5   -0.11    1.09
  -5   5   5    0.23    1.09
  -5   5  -5   -0.26    1.77
  -5  -5  -5   -0.61    1.97
  -5  -5   5    1.06    1.96
  -5   5  -6  191.64    9.59
   5   5   6  214.05    8.44
  -5   5   6  221.85    8.88
   5   5  -6  200.08    9.71
  -5  -5   6  213.12   10.60
   5   5   6  208.95    8.33
  -5  -5  -6  209.12    9.95
   5   5   7    0.53    1.21
  -5   5   7    0.90    1.45
  -5  -5   7    0.55    1.92
  -5   5  -7    0.50    1.60
   5   5  -7    0.14    1.62
  -5  -5  -7    0.69    1.86
   5   5   7   -0.17    1.18
  -5   5  -8    9.64    2.49
  -5  -5   8   11.57    3.10
  -5   5   8   13.98    2.67
   5   5  -8   12.57    2.92
   5   5   8   12.89    2.50
  -5  -5  -8   12.02    2.69
   5   5   8   12.36    2.21
   5   5   9   -0.21    1.25
  -5  -5   9   -0.32    1.71
  -5   5  -9    0.62    1.45
   5   5  -9   -1.45    1.81
  -5   5   9   -2.13    1.58
   5   5   9    1.29    1.10
   5   5 -10   35.26    5.13
   5   5  10   37.65    4.39
   5   5  10   41.42    4.75
  -5   5 -10   37.31    5.00
  -5   5  10   38.93    4.93
  -5  -5  10   41.28    5.27
   5   5  11    0.80    1.42
  -5   5 -11    0.60    1.91
   5   5  11    0.44    1.38
   5   5 -11    1.49    2.17
   5   5  12    2.87    1.49
   5   5  12    2.93    1.50
   5   5 -12    1.45    1.68
  -5   5 -12    3.35    2.17
   5   5  13    0.02    0.70
   5   5 -13    0.07    0.69
  -5   5  13    1.43    0.83
   5   5  13   -0.67    1.46
   5   5 -13   -0.89    2.25
   5  -5  13    0.03    0.61
  -5   5 -13   -0.22    1.63
   5   5  13   -0.50    1.65
   5   5  14   42.04    2.79
   5  -5  14   40.85    4.72
   5   5 -14   44.18    6.42
  -5  -5  14   40.84    2.70
   5   5  14   44.41    5.35
   5   5  14   41.48    2.47
   5  -5 -14   41.09    5.98
  -5   5  14   43.00    2.59
   5   5 -14   39.73    2.39
  -5   5  14   43.96    3.10
  -5   5 -14   44.59    6.07
   5  -5  14   42.80    2.67
   5  -5  15   -0.10    1.17
   5   5  15    1.74    0.86
   5   5  15   -1.50    1.55
   5   5 -15    1.95    2.89
   5  -5 -15    0.83    1.56
  -5   5 -15   -1.21    2.11
   5   5 -15    0.18    0.76
  -5   5  15    0.72    1.09
  -5   5  15    0.05    0.80
   5  -5  15    1.68    1.00
  -5  -5  15    0.62    0.84
   5   5  15    0.03    0.81
  -5   5  16   35.16    2.57
  -5   5  16   37.40    3.03
   5  -5 -16   34.58    5.64
   5   5 -16   32.63    2.25
  -5   5 -16   33.50    5.63
   5   5  16   38.11    2.46
   5  -5  16   36.08    2.54
   5   5 -16   39.27    6.58
   5   5  16   36.59    5.29
   5   5  16   35.36    2.73
  -5  -5  16   36.98    2.67
  -5   5  17    0.47    1.55
   5   5  17    0.20    0.76
   5   5  17    0.17    1.62
   5   5  17    0.86    0.92
   5   5 -17    0.67    0.76
   5  -5  17    0.36    0.78
  -5   5 -17   -0.38    2.40
   5   5 -17    0.86    2.79
  -5  -5  17    0.31    0.76
  -5   5  17    0.20    1.08
   5   5  18   43.80    2.66
  -5   5  18   42.61    3.29
   5   5  18   42.04    3.02
  -5   5  18   44.77    3.39
  -5  -5  18   41.99    2.96
   5  -5  18   45.54    2.94
   5  -5  19    0.18    0.72
  -5   5  19    1.58    1.13
  -5   5  19    0.63    2.42
  -5  -5  19    0.84    0.96
   5   5  19    1.79    0.95
   5   5  19    1.15    0.83
  -5  -5  20  188.68    6.14
   5   5  20  190.86    5.34
  -5   5  20  193.99    6.84
  -5   5  20  181.75    5.97
   5  -5  20  197.69    6.12
   5   5  20  188.26    6.35
  -5  -5  21   -0.27    0.72
  -5   5  21   -0.09    1.07
   5   5  21    0.26    0.71
   5   5  21    0.43    0.84
   5  -5  21   -0.17    0.72
   5   5  22  123.73    4.81
  -5   5  22  122.09    5.08
  -5  -5  22  126.44    4.66
   5  -5  22  129.57    4.57
   5   5  22  120.02    3.72
  -5  -5  23    0.25    0.73
   5   5  23    0.51    0.85
   5  -5  23    0.34    0.64
  -5   5  23   -0.63    0.98
   5  -5  24   45.03    2.40
  -5  -5  24   39.90    2.33
  -5  -5  25   -0.09    0.54
   5  -5  25   -0.07    0.54
  -5  -5  26   18.51    1.23
   5  -5  26   20.61    1.29
   0   6   0 2394.86   27.28
   0   6   0 2395.55   33.08
   0  -6   0 2467.67   33.52
  -6   0   0 2427.46   29.89
   0   6  -1   -1.06    0.96
   0  -6  -1   -0.81    1.51
   0   6  -1    0.30    1.40
   0   6   1   -1.64    1.77
   0  -6   1   -0.59    1.54
   0   6   1   -0.60    0.91
  -6   0   1   -0.92    1.24
  -6   0  -1   -0.81    1.13
   0   6  -2  158.75    5.90
   0  -6   2  155.46    7.27
   0   6   2  161.68    7.22
   0  -6  -2  168.18    6.90
  -6   0   2  154.86    5.65
   0   6   2  157.53    5.56
   0  -6   3    0.69    1.54
   0   6   3    0.57    1.42
  -6   0   3    1.02    1.03
   0   6  -3    1.86    1.41
   0  -6  -3    0.89    1.56
   0   6   3    0.34    0.86
   0  -6   4   47.33    4.89
   0   6   4   45.32    4.71
  -6   0   4   46.68    3.20
   0   6  -4   46.81    3.93
   0  -6  -4   45.25    3.99
   0   6   4   47.75    3.74
  -6   0  -4   43.77    4.15
   0   6  -5    1.08    1.10
  -6   0   5   -0.15    1.03
   0   6   5    1.54    1.16
   0  -6   5   -0.75    1.80
   0   6   5   -0.73    1.59
  -6   0  -5    0.32    1.08
   0  -6  -5   -0.53    1.28
   0   6   6   14.55    3.13
   0   6  -6   14.37    2.81
  -6   0   6   17.66    2.15
   0  -6  -6   15.82    2.56
   0   6   6   13.67    2.25
   0  -6  -6   11.13    1.34
  -6   0  -6   15.37    2.75
   0  -6   6   18.04    3.79
   0   6  -7    0.13    1.47
   0   6   7    4.16    2.06
   0  -6   7    2.23    2.39
   0  -6  -7    0.37    0.61
   0   6   7    2.84    2.28
  -6   0  -7    0.82    1.59
   0  -6  -7    1.14    1.44
   0   6  -8    9.05    2.21
   0  -6  -8    7.25    1.81
   0   6   8   10.50    2.49
   0   6   8   10.15    2.12
  -6   0  -8    8.73    2.02
   0  -6  -9    1.30    1.42
   0   6   9    1.61    1.87
   0   6  -9    1.72    2.56
   0   6   9    2.24    2.70
  -6   0  -9    1.47    2.51
   0   6  10   10.27    2.85
  -6   0 -10   11.39    2.64
   0   6  10   11.15    2.34
   0  -6 -10   10.85    2.25
   0   6 -10   12.06    2.96
   0   6  11    0.94    1.49
   0   6  11    1.16    1.85
   0  -6 -11    1.18    1.42
  -6   0 -11    0.57    1.54
   0   6 -11    1.63    2.00
   6   0  12   31.52    4.29
  -6   0 -12   28.16    4.16
   0   6  12   37.38    4.99
   0   6 -12   37.55    5.06
   0   6  12   33.02    4.01
  -6   0 -13    1.75    1.80
   0   6  13    1.93    1.62
   6   0  13    0.40    1.71
   0   6 -13    2.88    2.37
   0   6  13    1.37    1.76
   0   6 -14   55.29    6.75
   0  -6  14   50.52    2.97
   0  -6  14   49.51    3.27
   0   6  14   52.26    2.68
   0   6  14   53.62    3.37
  -6   0 -14   48.27    5.72
   6   0 -14   52.18    7.20
   0   6  14   55.90    6.49
   0   6  14   53.23    5.50
   6   0  14   46.70    5.42
   6   0  15    0.20    0.53
   0   6  15    0.82    0.99
   0  -6  15    0.86    1.12
   6   0  15    1.61    1.89
  -6   0 -15    0.81    1.74
   0   6  15    0.41    1.47
   6   0 -15    0.72    2.52
   0   6  15    0.82    0.93
  -6   0  15    0.89    0.71
   0   6 -15    0.02    1.93
   0  -6  15   -1.15    1.31
  -6   0 -16   62.90    6.75
  -6   0  16   64.19    3.39
   0  -6  16   62.18    3.48
   0   6 -16   69.09    7.85
   0   6  16   65.29    6.41
   0  -6  16   66.62    3.80
   0   6  16   70.00    4.10
   6   0  16   60.48    6.38
   6   0  16   64.87    3.22
   0   6  16   65.44    3.14
   6   0 -16   65.78    8.61
   0   6  17    0.02    1.65
  -6   0  17    0.06    0.70
   6   0  17   -0.64    0.66
  -6   0 -17   -0.82    1.63
   0  -6  17    1.98    1.39
   0   6  17    0.74    1.02
   0   6 -17   -0.04    1.85
   6   0 -17    1.75    2.10
   0  -6  17    0.41    0.90
   6   0  17    0.29    1.61
   0   6  17    0.30    0.97
   6   0  18  164.14   10.78
   6   0  18  173.13    5.57
   0   6  18  160.60   10.42
   0   6 -18  177.57   13.48
   6   0 -18  190.39   14.46
   0   6  18  183.08    7.00
   0  -6  18  168.33    5.58
   0  -6  18  184.31    6.50
  -6   0  18  175.01    5.94
   0   6  18  176.24    5.42
   0   6  19   -0.75    1.15
  -6   0  19    0.48    0.83
   0  -6  19    1.11    1.09
   6   0  19   -0.89    0.92
   0   6  19    0.24    0.92
   6   0  20  226.67    6.47
   0   6  20  225.73    6.05
  -6   0  20  222.51    6.83
   0  -6  20  233.38    7.34
   0   6  20  238.05    8.05
   0  -6  21   -0.14    1.02
   0   6  21   -0.13    1.13
   6   0  21   -0.26    0.75
   0   6  21   -0.01    0.86
  -6   0  21   -0.31    0.87
   0  -6  22  306.69    7.88
  -6   0  22  269.56    7.27
   0   6  22  297.79    8.64
   0   6  22  270.21    6.29
   6   0  22  275.03    7.07
   0  -6  23    0.51    0.92
   0   6  23   -0.41    1.00
   6   0  23   -1.98    0.95
   0   6  23   -0.68    1.27
  -6   0  23   -0.81    0.87
   0  -6  24  118.93    4.39
  -6   0  24  110.04    4.08
   6   0  24  113.24    4.08
   0   6  24  116.11    4.84
   0  -6  25    0.31    0.75
  -6   0  25    0.76    0.69
   6   0  25   -1.06    0.64
   6   0  26   46.47    2.01
  -6   0  26   44.48    1.99
   0  -6  27    0.57    0.47
  -1  -6   0    5.68    2.30
   6   1   0    4.49    0.84
   1  -6   0    3.19    1.54
   1   6   0    3.40    1.01
   1   6   0    2.43    0.87
  -1   6   0    4.30    1.95
   1   6   0    5.70    2.12
  -6   1   0    3.22    1.09
  -6  -1   0    2.79    1.60
  -1   6   0    3.67    1.21
  -1   6   1  238.19    8.50
   1   6   1  230.71    8.61
   6   1   1  214.25    4.11
  -1   6  -1  228.58    8.45
   1   6  -1  234.85    6.21
  -6  -1   1  234.32    7.77
  -1  -6  -1  240.09    8.94
   1   6  -1  241.26    9.03
   1  -6   1  228.43    8.24
  -6   1   1  224.51    6.06
  -1   6  -1  240.60    7.31
   1  -6  -1  233.63    8.03
  -6  -1  -1  238.80    8.05
  -1  -6   1  253.73    9.60
   1   6   1  231.31    6.25
   1  -6  -2  277.14    8.79
  -6   1   2  259.29    6.30
  -1   6   2  287.48    9.59
  -1   6  -2  271.84    8.31
  -6  -1  -2  274.87    8.89
   1   6  -2  259.77    7.38
   1  -6   2  267.42    9.33
  -1  -6   2  269.83   10.15
  -1   6   2  285.34    7.74
  -6  -1   2  262.34    8.45
  -1  -6  -2  282.54    9.71
   1   6   2  285.88    7.45
   1   6   2  285.78    9.72
  -6   1   3 1000.39   13.79
   1  -6   3 1061.24   20.38
  -1  -6  -3 1054.81   19.91
   1   6  -3 1072.97   17.55
   6   1   3  969.99   11.56
  -6   1  -3 1089.32   20.27
  -1   6   3 1086.29   19.75
  -1  -6   3 1027.84   21.35
  -6  -1   3 1014.75   18.28
   1   6   3 1041.89   20.03
  -1   6  -3 1066.24   18.56
   1   6   3 1063.56   16.73
  -1   6   3 1048.92   16.96
   1  -6  -3 1038.01   17.67
  -6   1  -4  723.15   16.30
  -1   6   4  702.57   13.93
   1   6   4  712.77   13.70
  -1  -6  -4  702.03   16.24
   1  -6  -4  674.67   13.92
  -1   6   4  717.98   16.52
   1   6   4  699.98   16.48
  -1  -6   4  726.61   17.89
  -6   1   4  643.40   10.26
   6   1   4  663.64    9.53
  -6  -1   4  685.15   14.54
  -1   6  -4  689.43   15.08
   1  -6   4  661.03   16.54
   1   6  -4  670.08   14.46
  -6   1  -5  512.84   14.14
  -6  -1   5  523.87   12.60
   1  -6   5  532.94   14.87
   1   6  -5  518.64   13.12
  -6  -1  -5  500.27   12.72
  -1  -6  -5  518.74   13.60
  -1  -6   5  517.99   15.54
  -1   6   5  521.99   14.13
  -1   6   5  533.58   12.25
   1  -6  -5  512.30   12.17
   1   6   5  529.41   12.11
   1   6   5  522.84   14.27
  -1   6  -5  544.67   13.97
  -1   6   6   26.49    3.36
  -1  -6   6   28.41    3.96
  -1   6   6   22.10    2.81
  -6   1  -6   29.35    3.90
  -1   6  -6   30.33    3.62
   1  -6  -6   31.65    3.05
   1   6  -6   27.52    3.55
  -6  -1   6   24.48    2.82
   1   6   6   24.88    2.84
  -6  -1  -6   26.72    3.40
  -1  -6  -6   28.65    3.55
   1  -6   6   25.14    3.63
   1   6   6   26.26    3.46
  -6  -1   7  644.34   15.01
  -1   6   7  618.79   14.70
   1  -6  -7  660.34   14.73
  -6  -1  -7  617.17   15.30
  -1  -6   7  661.30   18.69
   1   6   7  636.26   14.77
  -6   1  -7  607.99   16.54
   1   6  -7  625.60   16.23
   1   6   7  644.66   16.72
  -1   6  -7  648.59   16.83
  -1  -6  -7  630.27   15.80
  -1   6   7  645.59   16.73
  -1   6   8  135.22    6.91
   1  -6  -8  138.52    6.65
   1   6   8  137.77    7.06
  -1  -6   8  144.44    8.75
  -6  -1  -8  131.94    7.15
   1   6   8  142.14    7.94
   1   6  -8  137.35    7.72
  -6   1  -8  138.94    7.93
  -1   6  -8  140.60    7.94
  -1  -6  -8  141.40    7.39
  -1   6   8  147.00    8.00
   1   6  -9  459.13   15.25
  -1   6  -9  449.63   15.38
  -1   6   9  466.88   15.19
  -1   6   9  443.86   13.10
  -6   1  -9  451.84   14.94
   1   6   9  446.85   13.29
  -6  -1  -9  464.87   14.08
  -1  -6  -9  461.67   14.18
   1  -6  -9  462.36   12.93
   1   6   9  469.90   15.10
   1  -6  -9  443.77   12.02
  -6   1 -10   95.33    6.95
  -6  -1 -10   92.46    6.45
   1  -6 -10   90.20    5.43
  -1   6  10   95.06    6.18
  -1   6 -10   96.01    7.37
   1  -6 -10  101.26    6.16
   1   6 -10   92.34    7.26
  -1   6  10  102.29    7.32
   1   6  10   94.35    6.39
   1   6  10  101.33    7.26
  -1  -6 -10   98.46    6.63
   1   6 -11  448.35   16.77
   1   6  11  447.31   14.35
  -6   1 -11  445.36   15.63
  -1   6  11  463.45   16.49
  -1   6  11  432.71   13.83
   6   1  11  462.44   15.60
   1  -6 -11  460.56   14.06
  -1   6 -11  436.25   16.63
  -6  -1 -11  442.32   14.82
   1   6  11  448.15   16.17
   1   6  12   42.94    4.63
   1  -6 -12   42.55    4.43
  -6   1 -12   37.13    4.96
  -1   6 -12   41.14    5.27
  -1   6  12   40.76    4.63
   1   6 -12   40.55    5.44
  -6  -1 -12   41.86    4.80
  -1   6  12   48.56    5.65
   1   6  12   45.69    5.45
   6   1  12   44.18    5.21
   6   1  13  427.74   15.92
   6   1 -13  426.80   19.67
  -6  -1 -13  423.07   15.54
   1   6 -13  419.99   17.80
  -1   6 -13  415.56   17.48
   6  -1  13  419.04   15.79
  -6   1 -13  399.48   16.30
   1   6  13  424.29   17.18
   1   6  13  414.60   14.88
  -1   6  13  420.85   17.25
  -1   6  13  413.48   14.70
   1   6  14    1.31    0.87
  -6  -1 -14    1.38    1.41
   1   6  14    2.02    1.90
  -1   6  14    1.68    0.94
   6  -1  14    3.77    2.23
  -1   6 -14    1.80    2.00
   1   6  14    1.81    1.61
   1  -6  14    2.36    1.13
  -1   6  14    1.01    1.71
  -1  -6  14    1.43    0.99
  -1  -6  14    1.88    0.87
   6   1  14    0.76    1.67
   1  -6  14    1.78    0.86
  -6   1 -14    2.79    2.15
   1   6  14    1.57    0.83
   6  -1 -14    1.37    2.39
   6   1 -14    2.64    2.28
  -1   6  14    1.33    0.92
   1   6 -14    3.49    2.43
  -1   6  14    0.84    1.33
  -6  -1 -15   87.53    7.56
   6   1  15   84.43    7.70
  -1   6  15   86.67    3.56
  -1  -6  15   81.00    3.87
  -6  -1  15   79.25    3.64
  -1   6  15   89.07    4.59
   6   1  15   81.55    3.54
   1  -6  15   84.95    3.96
   1   6  15   89.57    3.64
  -1   6  15   85.22    7.14
   6  -1 -15   86.25    9.44
   1   6 -15   85.26    8.74
   6  -1  15   84.03    3.50
   1   6  15   93.71    4.57
   1  -6  15   90.15    4.36
  -1   6 -15   84.29    8.42
  -1  -6  15   87.00    4.33
   6   1 -15   88.82    9.56
  -6   1 -15   88.28    8.04
   1   6  15   88.97    7.33
  -6   1  15   80.62    3.75
   6  -1  15   78.95    7.14
  -6  -1  16    4.12    1.08
   1   6  16    6.31    2.18
  -1  -6  16    4.14    1.39
  -1   6  16    5.43    2.07
  -1   6 -16    7.61    3.07
   1  -6  16    4.12    1.28
   6  -1  16    5.54    1.12
   1   6  16    5.04    1.37
  -1   6  16    4.25    1.28
   6  -1  16    4.88    2.35
   6   1  16    4.58    1.02
  -1  -6  16    4.04    1.21
  -1   6  16    3.91    1.11
   1   6 -16    3.23    2.26
  -6   1 -16    3.47    1.84
   1   6  16    5.09    1.20
   6   1  16    5.69    2.28
   1  -6  16   10.93    1.94
  -6   1  16    4.78    1.08
  -1  -6 -16    5.60    2.38
   6  -1 -16    4.60    3.28
   6   1 -16    4.48    2.19
   6   1 -17   81.59    9.45
  -1  -6  17   71.91    3.68
   1  -6  17   74.19    3.87
   1   6  17   79.77    4.41
   1   6 -17   75.70    8.65
  -6   1 -17   69.81    7.57
   1   6  17   78.20    7.29
   6   1  17   69.39    3.48
   6  -1 -17   76.99    9.27
  -6   1  17   71.65    3.72
  -1   6  17   81.50    4.55
   6  -1  17   73.59    3.56
  -1   6 -17   79.40    8.74
  -6  -1  17   71.97    3.68
  -1   6  17   70.25    6.70
   6   1  17   67.59    6.97
   1   6  17   75.01    3.51
   6  -1  17   63.55    6.78
  -1   6  17   75.46    3.45
   1  -6  17   80.89    4.19
  -1  -6  17   77.53    4.13
  -6   1  18    3.36    1.09
   1   6  18    5.12    2.24
   1   6  18    4.13    1.40
   1   6  18    3.60    1.31
  -6  -1  18    3.31    1.04
   6   1  18    3.43    2.02
   1   6 -18    6.08    3.33
   6   1 -18    2.79    2.11
  -1  -6  18    5.07    1.44
  -1  -6  18    4.22    1.44
   1  -6  18    3.25    1.24
   6  -1  18    3.57    1.93
   6  -1 -18    3.56    2.68
   6   1  18    3.39    1.10
  -1   6  18    2.11    1.85
  -1   6  18    3.65    1.47
  -1   6 -18    7.07    3.59
  -6   1 -18    1.19    2.26
   6  -1  18    3.62    1.00
  -1   6  18    2.98    1.16
   1   6  19   15.18    2.15
  -1  -6  19   15.43    1.99
   1  -6  19   16.41    2.05
  -6   1  19   13.64    1.73
   6   1  19   15.15    1.76
   6  -1  19   14.83    1.71
  -1   6  19   15.58    2.22
  -6  -1  19   14.27    1.73
  -1   6  19   14.82    1.72
   1   6  19   16.50    1.80
  -6   1  20    2.50    1.11
   1  -6  20    1.23    1.02
  -1   6  20    2.70    1.36
  -1  -6  20    1.41    1.18
  -6  -1  20    1.31    0.87
   1   6  20    1.15    1.28
   6  -1  20    2.92    1.04
  -1   6  20    2.81    1.22
   6   1  20    2.32    0.96
   1   6  20    2.18    1.08
  -1   6  21   13.95    2.16
  -1  -6  21   14.53    1.99
   6  -1  21   13.00    1.62
   6   1  21   11.23    1.60
  -6  -1  21   11.52    1.62
   1  -6  21   12.83    1.94
  -6   1  21   11.90    1.76
  -1   6  21   13.13    1.63
   1   6  21   14.00    1.60
   1   6  21   13.78    2.11
  -1   6  22    1.19    1.18
  -1   6  22    0.46    1.09
   6  -1  22    0.69    0.76
  -6   1  22    0.79    0.98
   1   6  22    1.59    0.96
  -1  -6  22    1.69    1.20
   6   1  22    1.69    0.95
   1   6  22    1.57    1.30
   1  -6  22    2.13    1.21
  -6  -1  22    1.46    0.93
   1   6  23   10.13    1.83
  -6   1  23   10.42    1.52
   1  -6  23   11.75    1.60
   6  -1  23   11.74    1.45
  -1   6  23   11.46    1.75
   1   6  23   10.25    1.25
  -1   6  23   10.55    1.68
  -1  -6  23   10.31    1.55
   6   1  23   10.52    1.43
  -6  -1  23    9.70    1.37
  -1  -6  24    0.66    0.82
   6   1  24    0.53    0.65
  -6  -1  24    1.23    0.71
  -6   1  24    1.29    0.81
  -1   6  24    0.89    1.06
   6  -1  24    1.27    0.81
   1   6  24    1.13    1.11
   1  -6  24    0.85    0.91
   6  -1  25   38.24    2.09
   1  -6  25   39.21    2.32
  -6  -1  25   32.31    1.99
  -6   1  25   33.22    2.06
   6   1  25   35.89    2.04
  -1  -6  25   40.75    2.38
  -1  -6  26    0.63    0.56
   6   1  26    0.86    0.52
  -6   1  26    1.30    0.52
   6  -1  26    0.60    0.49
   1  -6  26    0.80    0.60
  -1  -6  27   49.33    2.04
   1  -6  27   47.44    2.01
   2   6   0  374.35    6.61
   6   2   0  391.44    8.12
  -2  -6   0  416.76   12.78
   2   6   0  413.51   12.01
  -2   6   0  424.95   10.38
   2  -6   0  392.56   10.25
  -2   6   0  404.94   10.99
   2   6   0  411.95    7.84
  -6   2   0  391.80    7.85
  -6  -2   0  409.49   11.56
   2   6   1    7.33    1.22
  -2  -6   1   10.82    2.72
  -2  -6  -1   10.15    2.42
   6   2   1    8.62    1.18
  -6  -2   1    6.27    1.91
   2   6  -1    8.33    2.13
   2  -6  -1    8.36    1.56
   2   6  -1    9.59    1.32
  -2   6   1    8.38    1.82
  -2   6  -1    7.92    1.65
  -2   6  -1    9.08    1.89
  -6   2   1    8.33    1.00
   2   6  -1    9.47    1.04
  -6  -2  -1    9.57    2.05
   2   6   1    9.37    2.11
   2  -6   1    7.97    1.71
  -6  -2  -2  784.54   15.76
   2   6   2  735.81   12.47
   2  -6  -2  712.99   13.12
   2   6  -2  713.67   12.34
   2   6   2  717.63   15.92
   2  -6   2  710.55   14.90
  -2   6  -2  720.24   14.98
  -2  -6  -2  763.78   16.83
  -2  -6   2  774.08   18.19
   6   2   2  730.16   10.44
  -6  -2   2  756.43   15.79
  -2   6  -2  754.76   14.93
  -2   6   2  757.13   15.28
   2   6   3   52.90    4.51
   2  -6   3   50.94    4.25
  -2   6   3   56.87    4.35
  -2  -6   3   53.26    5.03
  -2   6   3   56.19    3.80
  -6   2  -3   51.57    4.64
  -6  -2  -3   52.18    4.37
   2   6   3   52.26    3.50
  -2  -6  -3   49.69    4.57
  -6  -2   3   47.26    4.17
  -2   6  -3   52.98    4.14
   2  -6  -3   46.39    3.27
   6   2   3   52.65    2.65
   2   6  -3   49.47    3.62
  -2   6   4  385.08   11.42
  -2  -6  -4  383.22   12.04
   2   6   4  368.17   11.36
  -6  -2   4  374.37   11.43
   2  -6   4  336.01   11.11
  -6   2  -4  374.57   11.87
   2   6   4  379.97    9.73
   2   6  -4  351.81   10.21
  -2   6   4  381.65    9.90
  -2  -6   4  360.74   12.80
  -2   6  -4  376.19   11.40
   6   2   4  374.68    7.80
   2  -6  -4  343.76    8.81
   6   2   5   20.39    1.99
  -2   6  -5   22.43    3.09
   2   6  -5   18.14    2.57
  -2  -6  -5   16.21    2.88
  -2   6   5   20.95    2.59
  -2  -6   5   23.98    3.78
  -2   6   5   22.57    3.13
   2  -6  -5   17.32    2.05
  -6   2  -5   18.77    2.93
   2   6   5   18.68    2.51
  -6  -2   5   19.68    2.93
   2   6   5   20.25    3.31
  -6   2  -6  172.23    8.81
  -2   6  -6  168.74    8.11
   2  -6  -6  155.90    5.99
  -6  -2   6  165.83    7.88
  -2   6   6  169.29    8.05
   2   6  -6  170.92    7.99
   6   2   6  174.16    5.95
  -6  -2  -6  159.95    6.71
  -2  -6   6  164.63    9.09
  -2  -6  -6  166.68    8.11
  -2   6   6  161.56    6.95
   2   6   6  168.03    7.12
   2   6   6  169.12    8.09
   6   2   7   43.14    3.36
  -6   2  -7   45.80    4.97
   2  -6  -7   41.92    3.33
  -2   6  -7   50.70    4.93
  -2  -6   7   44.91    5.44
  -2  -6  -7   50.67    4.70
   2   6   7   46.76    4.63
  -6  -2   7   45.42    4.42
  -2   6   7   46.25    4.15
   2   6   7   42.13    4.11
  -2   6   7   48.90    4.86
   2   6  -7   47.00    4.93
  -6  -2  -7   40.84    3.72
  -6   2  -8   98.47    6.96
   2  -6  -8   99.55    5.20
   6   2   8  100.24    5.32
  -2   6  -8   99.14    6.89
  -2   6   8   93.70    5.73
  -2  -6  -8  106.68    6.94
  -2   6   8  106.05    6.82
   2   6   8   94.59    5.88
   2   6  -8  101.19    6.83
  -6  -2   8  111.86    6.82
   2   6   8   97.64    6.61
  -6  -2  -8   97.05    5.69
  -2  -6   8  103.81    7.56
  -6  -2  -9    0.05    1.08
  -2  -6  -9    0.87    1.40
  -2   6   9    1.01    1.39
  -2  -6   9   -0.07    1.61
   2   6   9    2.22    2.02
   2  -6  -9    0.22    0.95
   2   6   9    1.14    1.41
   2   6  -9    0.84    1.59
  -6   2  -9    2.41    2.02
  -2   6  -9    0.21    1.62
  -2   6   9    3.06    1.84
  -2   6  10  125.81    7.22
  -6   2 -10  130.49    8.46
  -6  -2 -10  131.57    7.32
  -2   6  10  135.56    8.68
  -2   6 -10  132.97    8.53
   2  -6 -10  135.38    6.62
   2   6  10  128.64    7.50
   2   6  10  135.87    8.40
   6   2  10  148.16    8.48
  -2  -6 -10  132.44    7.97
   2   6 -10  135.95    8.86
   6   2  11    7.31    3.13
  -6  -2 -11    2.28    1.68
  -2   6  11    4.52    2.42
  -2   6 -11    5.73    2.85
  -6   2 -11    5.25    2.60
   2   6  11    4.27    2.43
   2   6 -11    4.06    2.75
   2  -6 -11    1.80    1.54
  -2   6  11    4.94    2.92
   2   6  11    4.77    2.33
   2   6  12   53.75    5.77
  -6  -2 -12   50.85    4.97
  -6   2 -12   46.98    5.48
  -2   6 -12   50.32    5.90
  -2   6  12   52.74    5.77
   2   6 -12   51.03    5.92
  -2   6  12   53.33    5.05
   6   2  12   49.66    5.36
   6   2 -12   46.42    6.49
   2   6  12   50.46    5.05
   2   6  13    0.95    1.47
   2   6  13    0.84    1.72
  -2   6  13    1.62    1.51
  -6  -2 -13    0.77    1.51
   2   6 -13    1.51    2.13
   6   2 -13    0.24    2.07
  -2   6  13    1.13    2.03
  -6   2 -13    2.69    2.03
   6   2  13    1.50    2.04
  -2   6 -13    1.30    2.35
   2  -6  14  109.81    4.32
   2   6  14  111.09    3.99
  -6   2 -14  112.59    9.16
   2   6 -14  116.92    9.61
  -2   6  14  109.94    7.58
  -2   6  14  124.66    5.18
  -2  -6  14  106.16    4.35
  -2   6  14  115.02    4.00
   2   6  14  125.81    9.74
  -6   2  14  101.97    4.18
   2   6  14  118.89    8.35
  -2   6 -14  110.73    9.38
   2  -6  14  114.76    4.81
   2   6  14  116.97    4.83
   6   2 -14  128.15   10.83
   6   2  14  114.00    8.66
   6  -2  14  111.72    8.47
  -2  -6  14  112.71    4.85
   6  -2  15   11.54    2.79
  -6   2  15   11.51    2.52
   2   6  15   13.40    1.79
   2   6 -15    9.49    1.22
   2  -6  15   12.76    1.78
   2  -6  15   13.24    1.85
   2   6 -15   10.06    3.50
   6  -2 -15   13.20    4.02
  -2   6  15   12.60    1.56
   2   6  15   13.25    3.19
   2   6  15   12.16    1.65
  -2  -6  15   12.58    1.80
   6   2 -15   14.19    3.91
   6   2  15   12.61    3.15
   6  -2  15   12.03    1.43
  -2   6 -15   12.89    3.46
   6   2  15   11.10    1.43
  -2   6  15   10.74    2.68
  -6   2  15   10.40    1.45
  -6   2 -15   11.69    3.66
  -2   6  15   12.78    1.95
  -2  -6  15   14.25    2.17
   6   2  15   10.52    1.28
  -6  -2  15   10.96    1.52
   6   2  16  110.75    8.88
  -6   2  16  103.09    4.48
  -2  -6  16  113.14    5.00
   6   2  16  109.49    3.86
   2   6  16  116.25    8.76
   2  -6  16  118.56    4.96
  -2   6 -16  111.73   10.21
  -6   2 -16  103.61    9.26
  -2  -6  16  111.15    4.57
   2   6 -16  111.95   10.22
   6  -2  16  112.89    4.26
   2  -6  16  108.93    4.48
   6  -2 -16  119.94   11.25
  -2   6  16  112.76    4.16
   2   6  16  110.26    4.21
   6  -2  16  108.82    8.44
  -2  -6 -16  119.23    9.72
   6   2  16  107.80    4.24
  -2   6  16  107.31    8.05
  -2   6  16  125.38    5.47
   6   2 -16  115.31   11.00
   2   6  16  115.18    5.12
  -6  -2  16  106.99    4.35
  -6   2  16  106.56    4.52
  -6   2  17   -0.01    0.84
  -6  -2  17    1.56    1.08
  -2   6 -17    0.62    1.88
  -2  -6 -17   -0.47    1.76
  -6   2 -17    1.02    2.02
  -2  -6  17    0.47    0.96
  -2   6  17    1.03    1.24
   6  -2  17   -0.54    1.60
  -2   6  17    0.96    0.99
   6  -2 -17    1.77    2.04
   2   6  17    0.58    1.01
   2  -6  17    1.04    1.11
  -2   6  17   -0.57    1.29
   6  -2  17    0.55    0.75
   6   2 -17    0.44    2.34
   2   6 -17   -0.81    2.38
  -2  -6  17    0.43    1.18
   2   6  17   -0.75    1.43
   6   2  17    0.22    0.77
   6   2  17   -0.01    1.38
   2   6  17    0.68    0.85
   6  -2  18   94.02    7.95
  -6  -2  18  102.86    4.45
   6   2  18  102.66    4.37
   6  -2  18  105.59    4.28
   2  -6  18  115.77    5.00
   2   6 -18  112.42   10.78
  -2   6  18  105.40    4.11
   2   6  18  105.88    8.77
  -6   2 -18  106.35    9.61
  -2   6 -18  106.33   10.40
   6   2 -18  105.11   11.00
   2   6  18  105.82    5.16
  -2   6  18   96.02    7.79
   6   2  18  103.28    8.73
  -2   6  18  110.72    5.41
  -2  -6  18  106.39    4.89
  -6   2  18  106.38    4.75
   6  -2 -18   98.65   10.49
   2   6  18  107.90    4.19
  -2   6  19    0.96    0.92
  -2   6  19    2.74    1.43
   6  -2  19    1.79    0.93
   6   2  19    2.00    0.90
  -2  -6  19    1.82    1.01
  -6   2  19    1.38    0.99
  -6  -2  19    2.41    1.01
   2  -6  19    2.84    1.25
   2   6  19    0.81    0.99
   2   6  19    1.98    1.02
   6  -2  20  269.91    7.11
  -2  -6  20  272.84    7.88
   2   6  20  260.91    6.55
  -6  -2  20  256.87    7.16
   6   2  20  273.30    7.40
   2  -6  20  279.23    7.85
  -2   6  20  275.34    8.70
   2   6  20  271.09    8.32
  -6   2  20  267.52    7.80
  -2   6  20  258.25    6.55
   2   6  21    3.64    1.08
   2   6  21    2.05    1.09
  -2   6  21    1.84    1.18
   6  -2  21    2.75    0.92
  -2   6  21    3.78    1.39
  -6  -2  21    3.37    1.14
  -6   2  21    3.28    1.13
   2  -6  21    3.19    1.15
   6   2  21    3.77    1.19
  -2  -6  21    3.96    1.38
  -2   6  22  107.90    3.91
   2   6  22  114.08    5.04
   2  -6  22  119.77    4.73
  -6  -2  22   98.81    4.17
  -2   6  22  111.29    5.31
  -6   2  22   97.28    4.41
   2   6  22  106.45    3.74
  -2  -6  22  114.27    4.69
   6   2  22  109.58    4.44
   6  -2  22  106.48    4.15
   6   2  23   15.93    1.58
   2  -6  23   17.54    1.84
   2   6  23   15.23    1.42
  -2  -6  23   19.03    1.93
  -6   2  23   16.84    1.79
  -6  -2  23   17.20    1.69
   2   6  23   17.43    2.07
   6  -2  23   15.95    1.59
  -2   6  23   15.83    2.26
  -2   6  23   16.71    2.09
  -2   6  24   40.35    2.61
   2   6  24   52.44    3.12
   2  -6  24   55.55    2.91
   6   2  24   47.27    2.57
  -2  -6  24   52.64    2.89
   6  -2  24   49.38    2.53
  -2   6  24   49.70    3.19
  -6  -2  24   44.74    2.52
  -6   2  24   46.38    2.62
  -2  -6  25    4.65    0.95
   6   2  25    3.26    0.79
  -6  -2  25    3.72    0.89
   6  -2  25    3.88    0.85
   2  -6  25    3.70    0.93
  -6   2  25    4.07    0.85
  -2  -6  26   27.15    1.73
   2  -6  26   27.83    1.72
   6  -2  26   22.21    1.37
   2  -6  27    1.03    0.50
  -2  -6  27    0.67    0.43
   3   6   0  217.75    5.61
   3  -6   0  207.50    6.97
  -3   6   0  220.28    8.29
   3   6   0  216.96    9.21
  -3  -6   0  212.75    9.87
  -6  -3   0  219.89    8.98
  -3   6   0  216.62    8.13
   6   3   0  202.07    6.68
  -6  -3  -1    1.48    1.69
   6   3   1    1.81    0.90
  -6  -3   1    1.18    1.60
   3   6  -1    0.42    1.37
   3   6   1    1.18    1.43
  -3   6  -1    1.27    1.14
  -3  -6  -1    1.03    1.77
  -3  -6   1    1.38    1.84
  -3   6  -1    1.42    1.31
  -3   6   1    0.04    1.03
   3   6  -1    0.07    0.67
   3   6   1    1.05    0.75
   3  -6   1    0.96    1.05
   3  -6  -1    0.54    0.83
   3   6  -1    0.49    0.39
   3   6  -2   20.54    2.38
   3   6   2   19.73    2.17
   3  -6  -2   16.09    1.84
  -3  -6   2   19.88    3.89
  -3   6  -2   19.00    3.05
   3   6   2   19.44    3.07
  -6  -3   2   20.33    3.27
  -6  -3  -2   20.26    3.44
  -3  -6  -2   17.96    3.41
   3  -6   2   18.61    2.56
   6   3   2   21.09    2.13
  -6   3  -2   18.47    3.45
  -3   6  -2   17.20    2.57
  -3   6   2   22.60    2.83
   3   6   3  221.27    7.04
  -6   3  -3  209.80    9.28
   3   6   3  213.59    8.49
  -3   6  -3  227.04    8.85
   6   3   3  220.04    6.42
  -3  -6  -3  218.48    9.50
  -6  -3  -3  221.81    8.96
  -3   6  -3  227.44    8.12
   3   6  -3  225.06    7.44
  -3  -6   3  216.86   10.09
   3  -6  -3  195.78    5.56
  -6  -3   3  216.08    9.12
  -3   6   3  229.61    8.36
  -3  -6  -4   85.95    5.90
   3  -6  -4   69.04    3.23
  -6  -3  -4   80.44    5.63
   3   6   4   78.93    5.45
   3   6  -4   74.84    4.90
  -3  -6   4   84.65    6.77
  -6   3  -4   76.30    5.88
  -3   6  -4   82.45    5.59
  -3   6   4   84.75    5.32
  -6  -3   4   81.80    5.93
   3   6   4   82.26    4.75
   6   3   4   79.36    3.96
  -3  -6  -5  203.24    9.16
   3   6  -5  199.40    8.25
  -6   3  -5  185.94    9.23
   3  -6  -5  164.42    5.09
   3   6   5  185.81    7.29
   6   3   5  188.98    6.35
  -3   6  -5  188.13    8.79
  -3   6   5  186.18    7.36
  -6  -3   5  188.82    8.74
  -3  -6   5  200.15    9.93
  -3   6   5  199.39    8.26
   3   6   5  185.95    8.21
  -3   6   6   87.83    5.85
  -6  -3   6   86.02    6.17
   3   6  -6   82.64    5.77
  -3   6   6   80.16    5.06
  -6   3  -6   77.99    6.36
   3   6   6   84.36    5.78
  -3  -6   6   82.77    6.92
  -3  -6  -6   84.42    6.14
   3   6   6   86.68    5.24
  -3   6  -6   82.76    6.03
   6   3   6   76.74    4.38
   3   6   7  397.86   11.87
  -3  -6  -7  394.76   13.18
  -3   6   7  416.84   13.16
  -3   6  -7  390.29   13.58
  -6   3  -7  375.44   13.70
   6   3   7  394.05   10.51
  -6  -3  -7  358.47    9.93
  -3  -6   7  381.63   14.78
   3   6   7  375.82   12.60
  -6  -3   7  379.59   13.28
   3   6  -7  393.65   13.21
  -3   6   7  379.41   11.50
   6   3   8  162.13    8.46
  -6  -3  -8  139.61    6.26
  -6   3  -8  136.15    8.60
  -3   6  -8  153.99    9.04
   3   6  -8  166.84    9.28
  -3   6   8  153.36    8.43
   6   3   8  152.69    6.88
  -6  -3   8  156.92    8.54
  -3   6   8  141.43    7.12
  -3  -6   8  150.02    9.51
   3   6   8  150.35    8.15
  -3  -6  -8  152.46    8.52
   3   6   8  155.08    7.65
  -6  -3  -9   66.53    4.47
   3   6   9   71.94    5.38
   3   6   9   71.52    5.74
  -3   6   9   66.34    4.93
  -3  -6  -9   71.81    6.01
   6   3   9   77.82    5.10
  -6   3  -9   70.18    6.16
   6   3   9   75.45    5.84
  -3   6  -9   68.00    6.18
  -3  -6   9   76.88    6.98
  -6  -3   9   74.57    6.00
  -3   6   9   76.35    6.10
   3   6  -9   69.62    6.17
   3   6  10   12.66    2.83
  -6  -3 -10   10.96    2.10
  -3   6  10   11.07    2.27
  -3  -6 -10   12.48    2.81
   6   3  10   13.56    2.44
   6   3  10   15.57    3.01
  -3   6 -10   10.12    2.64
  -3   6  10   10.69    2.85
  -6   3 -10   11.82    2.96
   3   6  10   11.83    2.55
   3   6 -10   14.34    3.29
  -3  -6  10   16.31    3.36
  -3   6  11  380.38   12.91
  -3  -6 -11  381.74   15.13
   6   3  11  400.81   14.74
   3   6  11  397.14   14.08
  -6   3 -11  388.31   15.58
   3   6 -11  429.22   17.16
  -3   6 -11  377.74   15.79
  -3   6  11  403.42   15.59
   3   6  11  389.90   14.90
   6   3 -11  389.31   17.48
  -6   3 -12   69.90    7.04
   3   6  12   83.27    7.23
   3   6  12   79.79    6.48
   3   6 -12   77.62    7.63
   3  -6 -12   68.81    6.32
  -3   6 -12   79.51    7.61
  -3   6  12   73.58    5.88
   6   3 -12   79.79    8.19
  -3   6  12   76.54    7.38
   6   3  12   79.54    6.82
   3   6  13  325.26   14.87
  -3   6  13  327.14    8.44
   6   3  13  353.45   14.65
   3   6  13  335.31    8.01
   3   6  13  315.02    6.97
  -3   6 -13  320.02   15.59
   3   6 -13  336.82   16.49
  -3   6  13  317.45   12.70
  -3   6  13  336.38   15.72
   3  -6  13  308.37    7.46
  -3   6  13  317.48    6.98
   6   3 -13  352.64   17.63
  -6   3 -13  310.24   14.92
   3   6  13  327.85   13.88
  -3   6  14    1.40    1.05
   6  -3  14    1.07    0.60
   6   3  14   -0.52    0.70
   3   6  14    0.58    0.76
   3   6  14    0.93    1.52
   6   3  14    1.02    0.84
   3   6  14   -0.60    1.67
  -3  -6  14    0.79    1.07
  -3   6 -14    0.44    1.96
   6   3  14    2.26    1.98
   3  -6  14   -0.17    1.20
  -3   6  14    0.52    1.46
   3  -6  14    0.63    0.69
  -3  -6  14    0.88    0.95
   6   3 -14    1.16    2.37
   6  -3  14    1.14    1.34
   3   6 -14   -0.13    2.16
   3   6 -14    2.46    1.07
  -3   6  14    0.40    0.70
  -6   3 -14    1.99    2.48
   3   6  14    0.84    0.85
  -6   3  14    2.59    1.74
   3  -6  15  183.35    6.13
  -6  -3  15  164.23    5.39
   3   6 -15  161.05    5.00
   6   3  15  169.52    5.03
  -3  -6  15  171.70    5.75
  -6   3  15  162.60    5.37
  -3  -6  15  178.16    6.16
   3   6  15  178.42    5.32
  -3   6  15  170.22    9.76
   6   3  15  180.01   11.12
   6   3  15  171.68    5.38
  -3   6 -15  184.11   12.41
  -6   3  15  174.29    5.86
   6   3 -15  194.14   13.86
   6  -3 -15  185.20   13.73
   6  -3  15  171.35    5.23
   6   3 -15  166.50    4.94
   3   6  15  183.25    6.19
   3   6 -15  186.06   13.17
  -3   6  15  177.22    5.20
   3   6  15  190.14   11.02
   3  -6  15  184.56    5.85
  -6   3 -15  180.72   11.97
   6  -3  15  167.25   10.32
  -3  -6 -15  193.27   12.16
  -3   6  15  188.07    6.63
  -3  -6 -16   27.23    4.75
  -6  -3  16   27.46    2.22
   3   6  16   28.56    2.61
   3   6  16   27.42    2.21
   6  -3  16   26.77    2.12
  -3   6  16   26.69    2.14
  -6   3  16   27.79    2.99
  -3   6 -16   29.25    5.33
   6   3 -16   27.25    5.35
  -3  -6  16   27.13    2.37
   6   3 -16   25.90    1.94
   3   6  16   29.87    4.48
   6   3  16   26.43    2.19
   6  -3  16   24.21    4.08
   3   6 -16   23.34    4.94
  -3   6  16   29.07    2.89
  -6   3  16   28.38    2.47
  -6   3 -16   22.50    4.59
  -3   6  16   25.02    4.00
   3   6 -16   24.54    1.89
  -3  -6  16   23.69    2.34
   3  -6  16   26.36    2.42
   6   3  16   26.37    4.30
   6   3  16   26.30    2.01
   6  -3 -16   28.77    5.80
   3   6  17  100.28    4.12
  -3   6  17  104.81    4.20
   6   3  17  106.52    8.94
  -6  -3  17  107.50    4.44
  -3   6  17  117.77    5.49
   6   3  17  110.17    4.01
   3  -6  17  118.23    4.93
  -3  -6  17  106.74    4.79
   6  -3 -17  111.92   10.79
  -3  -6  17  105.04    4.65
  -3   6 -17  107.82   10.14
   3   6 -17  112.10   10.65
  -6   3 -17  104.82    9.59
  -3   6  17  101.76    7.86
   3   6  17  110.87    8.84
  -3  -6 -17  111.98    9.88
   6  -3  17  106.86    4.33
   3   6  17  109.40    5.04
  -6   3  17  129.96    6.12
  -6   3  17  112.26    4.95
   6  -3  17   95.52    8.01
   6   3  17  111.33    4.60
   6   3 -17  113.59   11.27
   3   6 -18    8.69    3.24
   6  -3 -18   14.78    4.39
   6   3  18   12.27    1.39
  -3   6 -18   11.13    3.92
   3   6  18   11.06    1.55
  -3  -6 -18   11.37    3.64
  -6   3  18   12.22    1.74
  -3   6  18    9.21    2.48
   6   3 -18    7.86    3.30
  -6   3  18   11.03    2.87
  -6   3 -18    9.48    3.17
  -3  -6  18   11.85    1.76
   6   3  18    9.80    2.93
   3  -6  18   10.81    1.68
  -6  -3  18    9.46    1.45
  -3   6  18   12.77    1.75
   3   6  18   10.28    1.86
   3   6  18    9.90    2.98
   6   3  18   11.70    1.62
   6  -3  18   10.30    1.52
  -3   6  18   11.99    2.12
  -6  -3  19   18.34    1.93
   3  -6  19   20.98    2.18
   6  -3  19   16.50    1.80
  -3   6  19   20.41    2.50
   3   6  19   21.35    2.37
  -3   6  19   19.74    2.03
  -3  -6  19   19.90    2.27
   6   3  19   17.01    1.88
   3   6  19   19.35    1.85
   6   3  19   16.68    1.56
  -6   3  19   17.99    2.16
  -3   6  20    9.50    1.77
  -6   3  20   10.46    1.74
   6  -3  20    8.83    1.38
  -6  -3  20    6.94    1.07
  -3  -6  20    9.55    1.62
  -3   6  20   11.08    1.79
   6   3  20    9.73    1.64
   3  -6  20    9.99    1.64
   3   6  20    8.40    1.70
   3   6  20   10.70    1.46
  -6  -3  21    0.81    0.85
  -3   6  21   -0.33    1.18
  -6   3  21    0.34    0.91
   3   6  21   -0.43    0.78
   3   6  21    0.57    1.11
  -3   6  21   -0.88    1.74
  -3  -6  21    0.32    0.92
   3  -6  21    0.51    0.95
   6   3  21    0.40    0.89
   6  -3  21    0.05    0.66
  -6  -3  22   13.03    1.62
  -3   6  22   10.18    1.86
  -6   3  22   11.86    1.63
   6  -3  22   12.36    1.50
   3   6  22   11.23    1.80
  -3  -6  22   13.74    1.77
   6   3  22   11.21    1.55
  -3   6  22   13.16    2.41
   3   6  22   11.68    1.33
   3  -6  22   12.86    1.62
   3   6  23    6.38    0.98
  -6  -3  23    5.44    1.12
   6   3  23    6.76    1.24
   6  -3  23    4.14    0.94
   3  -6  23    6.71    1.19
   3   6  23    5.25    1.30
  -3   6  23    4.92    1.31
  -3  -6  23    6.44    1.34
  -6   3  23    5.98    1.25
  -3   6  23    3.23    2.30
   6  -3  24    9.53    1.25
  -3  -6  24    8.25    1.24
   3  -6  24   10.82    1.39
  -6   3  24    8.40    1.25
   6   3  24    7.59    1.11
  -6  -3  24    8.89    1.18
  -3  -6  25   26.78    1.88
  -6  -3  25   25.22    1.67
   6   3  25   22.22    1.60
   6  -3  25   24.24    1.61
   3  -6  26    1.75    0.62
   6  -3  26    1.29    0.49
  -3  -6  26    1.25    0.57
  -6   4   0 2204.68   23.80
  -6  -4   0 2291.22   34.66
   6   4   0 2123.58   28.75
   4   6   0 2175.27   24.38
  -4  -6   0 2237.46   35.65
  -4   6   0 2286.89   29.34
   4   6   0 2285.59   32.50
  -4   6  -1   34.23    3.76
  -4  -6  -1   29.78    3.74
   4   6   1   33.56    2.42
  -4  -6   1   33.59    4.42
   4   6  -1   32.08    2.35
  -4   6  -1   34.55    2.98
  -4   6   1   36.77    3.19
   4   6  -1   35.64    3.72
   6   4   1   34.37    2.91
   4   6   1   31.60    3.41
   4   6  -1   36.06    1.87
  -6  -4  -1   32.41    3.87
  -6   4   1   36.38    2.35
  -6  -4   1   32.11    3.97
  -6   4  -1   31.52    1.74
  -4   6   2   79.32    4.70
  -6   4  -2   83.95    5.98
   4   6   2   78.61    5.17
   6   4   2   75.76    4.19
  -4  -6   2   76.65    6.22
  -6  -4   2   82.23    5.98
   4   6   2   76.15    3.94
  -6   4   2   79.86    3.91
  -4   6  -2   76.98    4.36
  -6   4  -2   70.06    2.39
  -4  -6  -2   76.07    5.92
  -4   6  -2   83.41    5.66
   4   6  -2   74.37    4.00
  -6  -4  -2   84.69    5.94
  -4  -6  -3    8.93    3.32
  -6  -4   3   10.65    3.20
  -6   4  -3    6.77    3.32
  -4   6  -3    7.07    2.44
   4   6   3    5.25    1.43
  -6   4   3    4.09    1.41
   6   4   3    3.23    1.10
   4   6  -3    7.22    1.95
  -6  -4  -3    6.01    3.23
  -6   4  -3    3.65    0.61
  -4   6   3    4.97    1.58
  -4  -6   3    5.46    2.95
  -4   6  -3    4.59    1.44
   4   6   3    4.22    1.56
  -4   6   4  171.47    7.54
  -6   4  -4  140.05    3.70
  -4   6  -4  160.95    6.74
  -6  -4   4  166.44    8.88
  -4  -6  -4  168.77    8.64
   4   6  -4  155.50    6.99
   6   4   4  155.34    6.25
  -4   6  -4  162.38    8.36
  -6   4   4  165.97    6.68
  -4  -6   4  167.33    9.32
  -6  -4  -4  161.37    8.54
   4   6   4  156.01    7.41
  -6   4  -4  152.47    8.55
   4   6   4  163.00    6.64
  -4   6  -5   23.68    3.51
  -6  -4  -5   23.01    3.35
   6   4   5   26.06    3.08
   4   6   5   24.89    2.95
  -6   4  -5   23.93    3.73
   4   6  -5   24.66    3.10
  -4  -6   5   23.77    4.09
  -6   4   5   24.91    2.93
  -6  -4   5   27.01    3.84
  -6   4  -5   21.49    1.63
  -4  -6  -5   24.71    3.90
   6   4   5   27.25    2.77
  -4   6   5   25.68    3.11
   4   6   5   25.37    3.27
  -6  -4  -6   57.56    5.08
  -4  -6  -6   57.42    5.28
  -6   4  -6   53.60    5.25
   6   4   6   60.12    4.66
   4   6  -6   52.66    4.71
  -4   6  -6   53.31    4.98
   4   6   6   55.86    4.39
   6   4   6   58.53    3.97
   4   6   6   58.04    4.80
  -4  -6   6   58.66    5.89
  -6  -4   6   59.96    5.55
  -6   4   6   56.62    4.49
  -4   6   6   59.21    4.84
   6   4   7   21.76    2.72
  -4   6   7   21.17    3.25
  -4   6  -7   19.48    3.58
  -4   6   7   18.48    2.87
  -6   4  -7   21.51    3.89
   4   6  -7   22.22    3.60
   4   6   7   20.14    2.92
  -4  -6  -7   20.28    3.64
   4   6   7   18.35    3.03
  -4  -6   7   19.39    3.83
  -6  -4   7   16.97    3.32
   6   4   7   23.02    3.38
   6   4   8   23.51    2.93
  -6  -4   8   25.18    3.93
   4   6   8   23.17    3.20
   4   6  -8   22.75    3.42
   4   6   8   22.73    3.13
  -4   6   8   23.63    3.53
  -6   4  -8   23.34    3.89
  -4   6   8   19.43    2.93
  -4  -6   8   23.36    4.02
   6   4   8   25.93    3.40
  -4   6  -8   20.43    3.61
  -4  -6  -8   22.60    3.61
  -4  -6   9    6.03    2.35
  -6   4  -9    6.67    2.39
  -4  -6  -9    6.60    2.09
   6   4   9    7.45    2.27
  -4   6  -9    8.65    2.76
   4   6   9    7.04    2.09
   4   6  -9    6.28    2.55
  -6  -4   9    7.99    2.69
   4   6   9    5.38    2.00
  -4   6   9    7.25    2.39
  -4   6   9    5.85    1.85
   6   4   9    6.04    1.80
  -4   6 -10    0.62    1.74
   4   6 -10   -1.51    2.13
  -4   6  10   -1.09    1.64
  -6   4 -10    0.14    1.68
   6   4 -10   -0.77    2.13
   6   4  10    0.54    1.10
  -6  -4  10    1.70    2.02
  -4  -6  10    1.38    2.03
   4   6  10   -0.79    1.47
  -4   6  10    0.34    1.22
   6   4  10   -0.12    1.29
  -4  -6 -10    0.07    1.77
   4   6  10   -0.75    1.38
   4   6 -11    2.37    2.46
  -4  -6 -11    1.56    1.62
   6   4  11    2.02    1.32
  -6   4 -11    1.82    2.06
  -4   6  11    1.34    1.55
   4   6  11    2.96    1.88
   4   6  11    3.07    1.80
   6   4 -11    1.87    2.59
   6   4  11    1.54    1.79
  -4   6 -11    3.44    2.32
  -4   6  11    2.27    1.60
  -4  -6 -12   30.40    4.46
  -4   6 -12   30.62    4.90
   6   4  12   32.13    4.32
  -4   6  12   28.57    4.50
   6   4 -12   27.80    4.84
   4   6 -12   29.64    4.79
  -6   4 -12   28.04    4.59
   4   6  12   30.15    4.09
   4   6  12   30.28    4.30
  -4   6  12   24.89    3.47
   4   6  13   19.78    1.74
  -4  -6  13   15.63    1.87
   6   4 -13   17.16    1.64
  -6   4  13   19.28    2.00
  -4   6  13   18.96    3.25
   4  -6  13   19.37    1.91
   6   4  13   20.17    3.79
  -4  -6 -13   15.16    3.20
   4   6 -13   19.62    4.44
   4   6  13   15.95    3.39
   4   6  13   18.20    3.50
   4  -6 -13   16.33    3.48
   6   4 -13   15.64    4.21
   4  -6  13   19.50    2.15
  -6   4 -13   18.55    4.01
  -4   6 -13   18.13    3.70
  -4   6  13   18.11    2.09
   6   4  13   17.26    1.64
  -4   6  13   18.68    1.73
   4   6  13   17.13    1.82
   4   6 -13   16.76    1.62
  -6  -4  14   53.68    2.92
   6  -4  14   55.95    2.89
  -4   6  14   60.02    3.03
   4   6  14   58.84    3.39
   6   4  14   59.29    3.08
  -4  -6  14   59.38    3.25
   6   4  14   64.56    6.55
  -4  -6  14   55.91    3.40
   4   6  14   58.51    2.95
  -4  -6 -14   68.60    7.20
  -4   6 -14   56.25    6.78
   4   6 -14   57.16    2.85
   4   6  14   58.36    6.55
   6   4 -14   62.91    7.86
  -6   4 -14   56.77    6.90
  -4   6  14   61.28    5.78
   4  -6  14   59.57    3.38
   6  -4  14   58.70    6.05
   4   6  14   61.84    6.29
   6   4 -14   58.75    2.85
  -4   6  14   58.00    3.64
  -6   4  14   61.10    3.43
   6   4  14   59.41    2.91
   4   6 -14   62.87    7.54
  -6   4  14   57.36    3.19
   6  -4 -15    7.51    3.41
  -4   6 -15    4.69    2.62
  -4   6  15    9.33    1.48
   4   6  15    6.17    1.34
   6   4  15    5.73    2.43
   4   6  15    5.97    1.20
   6   4  15    5.78    1.17
  -6   4  15    7.09    2.16
   4  -6  15    6.48    1.35
   6   4 -15    5.59    1.07
   6   4 -15    7.25    3.06
   6  -4  15    6.94    1.19
   4   6  15    6.33    2.65
  -4  -6 -15    6.30    2.38
   6  -4  15    6.70    2.22
  -4  -6  15    5.77    1.48
  -6  -4  15    5.80    1.16
  -4   6  15    6.73    2.15
  -4  -6  15    5.69    1.28
  -4   6  15    5.58    1.43
  -6   4 -15    4.27    2.81
  -6   4  15    7.49    1.46
   4   6 -15    4.58    1.06
   6   4  15    6.69    1.25
   4   6 -15    6.33    2.70
   6  -4  16   81.35    7.23
   4   6  16   85.51    7.80
  -6   4 -16   87.16    8.89
   6   4 -16   87.60    3.64
   4  -6  16   95.85    4.32
  -4  -6  16   90.41    4.39
  -4  -6  16   84.93    3.98
   6  -4  16   92.03    3.93
   4   6 -16   89.32    3.76
   6   4  16   94.55    8.31
  -4   6  16   94.94    4.77
  -6   4  16   93.69    4.56
  -6   4  16   89.61    4.30
   4   6 -16   95.64    9.74
  -4   6 -16   90.45    9.16
   4   6  16   89.94    4.39
   6  -4 -16   82.73    9.49
  -4   6  16   80.14    6.99
   6   4  16   89.07    3.68
  -4  -6 -16   95.54    9.02
   6   4 -16  109.31   10.87
   4   6  16   87.89    3.78
   6   4  16   94.42    4.21
  -4   6  16   92.22    3.89
  -6  -4  16   85.54    3.95
   6  -4 -17   -1.28    2.18
   6   4  17    0.52    0.79
   6   4 -17    0.30    0.80
   4   6  17    0.99    0.97
   6  -4  17   -0.28    0.76
   4   6 -17    3.30    2.37
  -4   6  17   -0.27    1.20
   4   6  17    1.73    2.08
  -4   6  17    0.58    1.04
  -4  -6  17    1.46    1.07
   4  -6  17    0.86    0.87
  -6  -4  17    0.51    0.75
  -4   6 -17   -1.99    2.95
   6   4 -17    3.06    3.06
  -6   4  17    1.18    0.97
   6   4  17   -0.15    1.50
  -6   4 -17    0.45    1.95
  -6   4  17   -5.84    3.18
  -4   6  17    0.68    1.03
   4   6  17    0.85    0.94
  -4  -6 -17    2.44    2.63
   4   6 -17    1.13    0.86
   6   4  17    0.65    0.81
   6   4  18  258.58    6.43
  -4   6  18  254.65    6.70
  -4  -6  18  247.51    7.44
   4   6  18  253.01    6.67
  -6  -4  18  248.81    6.99
   4   6  18  248.40    7.59
  -6   4  18  263.70    7.81
  -6   4  18  247.16    7.06
   6   4  18  255.76    7.34
   6  -4  18  260.51    6.95
   4  -6  18  265.11    7.38
  -4   6  18  272.76    8.35
  -6  -4  19    2.37    0.96
   6  -4  19    3.62    0.99
  -6   4  19    2.10    1.13
  -4   6  19    1.41    1.21
  -4  -6  19    3.22    1.16
   4   6  19    2.43    1.11
   4  -6  19    3.28    1.13
   4   6  19    2.51    1.00
   6   4  19    3.29    1.04
   6   4  19    2.69    0.91
  -4   6  19    1.89    1.57
   6   4  20   44.39    2.47
   4  -6  20   46.99    3.05
  -4   6  20   42.12    3.35
   6   4  20   43.67    2.91
   4   6  20   47.82    3.29
   6  -4  20   44.16    2.74
  -4  -6  20   46.60    3.08
   4   6  20   46.18    2.66
  -4   6  20   45.56    3.50
  -6   4  20   41.80    3.04
  -6  -4  20   44.45    2.86
  -4   6  21    5.25    1.64
  -6  -4  21    6.75    1.32
   4   6  21    6.50    1.42
   4  -6  21    6.35    1.24
   6  -4  21    7.30    1.24
  -6   4  21    5.94    1.24
  -4  -6  21    7.52    1.48
   4   6  21    6.44    1.15
   6   4  21    6.41    1.26
   6   4  21    6.36    1.04
  -4   6  21    5.55    2.56
  -6   4  22  155.35    5.50
   4   6  22  167.34    5.78
   4  -6  22  169.72    5.40
   4   6  22  156.25    4.43
  -4  -6  22  158.26    5.39
   6  -4  22  164.92    5.04
  -4   6  22  152.98    5.11
  -6  -4  22  156.58    5.08
   6   4  22  155.64    5.26
  -4   6  22  156.80    5.97
   6  -4  23    1.44    0.72
  -6   4  23   -0.09    0.83
  -6  -4  23    0.53    0.67
   4   6  23    0.54    0.86
   6   4  23    1.39    0.89
   4  -6  23    2.22    0.89
  -4  -6  23    1.79    1.00
   4   6  23    1.21    0.66
  -6  -4  24   75.13    3.02
  -4  -6  24   80.29    3.30
   4  -6  24   81.91    3.30
   6   4  24   72.27    3.07
   6  -4  24   75.51    2.99
  -6  -4  25    0.31    0.50
   6  -4  25    0.30    0.55
   4  -6  25    0.67    0.54
  -4  -6  25    0.64    0.61
   4  -6  26   29.79    1.58
  -4  -6  26   29.54    1.58
  -5   6   0   81.55    4.53
   5   6   0   85.05    3.62
   6   5   0   80.77    3.85
   5   6   0   74.84    3.38
   5   6   0   82.34    5.57
  -6  -5   0   80.52    6.28
  -5  -6   0   80.65    6.55
   6   5   0   81.24    5.02
  -6   5   0   85.97    3.89
   5   6  -1   49.59    4.25
   6   5   1   45.80    3.10
   5   6   1   48.16    3.02
  -6   5  -1   49.00    2.73
  -6   5   1   43.98    2.89
  -5  -6   1   47.03    4.96
  -5   6  -1   48.60    3.38
   5   6  -1   44.30    2.18
   6   5  -1   49.39    3.97
   5   6   1   45.72    4.02
  -6  -5  -1   42.66    4.54
   6   5   1   44.24    3.65
   6   5  -1   42.80    2.46
  -6  -5   1   41.79    4.65
   5   6  -1   41.11    2.99
  -5   6   1   45.45    3.39
  -5  -6  -1   41.95    4.55
  -5   6   2   36.18    3.26
  -6   5  -2   32.75    2.18
   6   5   2   32.65    3.18
  -6  -5   2   33.51    4.10
   5   6   2   32.79    3.45
   6   5   2   35.53    3.04
  -5  -6   2   33.23    4.34
  -5  -6  -2   31.84    4.04
  -6   5  -2   33.75    4.19
  -5   6  -2   35.32    4.03
   5   6   2   33.90    2.80
  -6  -5  -2   37.03    4.25
  -5   6  -2   33.65    2.94
   5   6  -2   31.14    2.97
  -6   5   2   36.14    2.97
  -6   5   3  110.60    5.29
   5   6   3  106.42    6.02
   5   6   3  110.44    5.27
  -6   5  -3  105.65    3.86
  -5  -6   3  111.10    8.03
  -6  -5  -3  110.56    7.34
   6   5   3  106.73    5.56
   6   5   3  110.86    5.49
   5   6  -3  104.83    5.71
  -5   6  -3  106.25    4.99
  -6  -5   3  109.59    7.72
  -5  -6  -3  111.07    7.51
  -6   5  -3  108.70    7.16
  -5   6   3  112.54    5.76
  -5   6  -3  112.40    7.06
   6   5   4   88.21    5.33
  -6  -5  -4   91.92    6.78
   5   6  -4   85.19    5.50
  -6   5  -4   90.77    6.75
  -6   5   4   93.46    5.28
  -6  -5   4   94.58    7.23
  -6   5  -4   83.57    3.53
   6   5   4   88.79    5.16
  -5   6   4   84.71    5.27
   5   6   4   81.63    5.43
   5   6   4   86.12    4.99
  -5   6  -4   85.66    4.65
  -5  -6   4   84.73    7.18
  -5  -6  -4   92.98    6.94
  -5   6  -4   89.50    6.53
   6   5   5  409.43   11.91
  -5  -6  -5  400.47   14.46
  -6  -5  -5  377.98   13.99
  -6   5  -5  396.41   14.27
   5   6   5  394.00   12.35
  -5   6  -5  398.43   14.22
  -6   5   5  405.06   11.85
  -5   6  -5  389.24   10.44
   5   6  -5  383.13   12.51
  -5  -6   5  411.10   15.60
  -6  -5   5  402.92   15.05
   6   5   5  383.10   11.22
   5   6   5  389.22   11.43
  -5   6   5  411.10   12.37
  -6   5  -6   24.17    3.93
   6   5   6   22.37    2.84
  -5  -6  -6   24.14    4.07
  -6  -5   6   20.06    3.65
   5   6   6   21.24    2.98
  -5   6   6   24.32    3.25
   6   5   6   22.64    2.97
  -5   6  -6   22.01    3.75
   5   6  -6   22.09    3.37
  -6   5   6   23.28    3.03
  -5  -6   6   21.43    4.15
  -6  -5  -6   23.10    3.73
   5   6   6   24.77    3.07
   6   5  -7  365.60   14.43
   5   6   7  383.44   12.37
   6   5   7  372.02   11.73
  -6  -5  -7  364.07   14.02
  -5   6   7  394.76   13.30
   5   6   7  387.13   12.71
   5   6  -7  348.23   13.48
   6   5   7  398.39   12.74
  -6   5  -7  374.96   14.85
  -6  -5   7  380.74   15.16
  -5  -6   7  389.50   15.86
  -5   6  -7  373.83   14.41
  -6   5   7  380.40   12.84
  -5  -6  -7  385.53   14.31
   6   5   8    0.22    1.26
  -5  -6  -8    0.02    1.59
  -5   6  -8    1.22    1.60
  -6   5   8    1.01    1.66
  -5  -6   8    0.54    2.13
   5   6   8    1.76    1.52
  -6  -5  -8    0.58    1.70
  -6   5  -8    1.24    1.89
   6   5  -8    0.73    1.57
   5   6  -8    0.96    1.41
   5   6   8    1.82    1.54
  -6  -5   8    0.40    1.87
  -5   6   8   -0.04    1.23
   6   5   8    1.22    1.30
  -5  -6   9  302.74   14.38
   6   5   9  304.28   12.00
  -5  -6  -9  287.35   12.93
  -5   6  -9  285.29   13.03
   5   6  -9  280.08   12.99
   6   5  -9  267.63   13.20
  -5   6   9  290.71   12.44
  -6  -5   9  288.54   13.66
  -6   5  -9  277.31   13.02
   6   5   9  271.19   10.75
  -6  -5  -9  279.00   12.77
   5   6   9  285.30   11.53
   5   6   9  285.86   11.72
  -6   5 -10   33.72    4.83
   6   5 -10   34.36    5.05
   5   6 -10   33.31    4.70
  -5   6  10   42.41    5.11
  -5   6 -10   36.02    5.01
   5   6  10   38.36    4.51
   6   5  10   36.47    4.14
  -5  -6 -10   36.05    4.85
   5   6  10   38.78    4.42
  -6  -5  10   35.54    4.92
   6   5  10   40.34    4.58
  -6  -5 -10   36.28    4.88
  -5  -6  10   35.23    5.16
  -5   6  11  170.19   10.45
   6   5  11  172.70    9.77
   5   6  11  174.92    9.81
   5   6  11  172.14    9.78
   6   5 -11  157.13   10.92
  -5  -6 -11  172.09   10.57
   6   5  11  163.37    9.15
   5   6 -11  172.07   11.15
  -6   5 -11  161.07   10.47
  -5   6 -11  166.84   10.89
  -5   6 -12    1.36    1.61
   6   5  12   -0.60    0.78
   5   6  12   -0.02    0.75
   6   5 -12    0.84    0.78
   6   5  12   -0.81    1.13
   6   5  12   -0.30    1.32
  -6   5  12    0.24    1.02
   5   6  12    2.33    1.79
  -6   5 -12    0.40    1.74
  -5   6  12   -0.10    0.81
   5   6 -12    2.15    2.58
   6   5 -12    1.12    2.00
   5   6  12    0.49    1.43
  -5  -6 -12   -0.31    1.88
   5   6 -12   -0.36    0.83
   6   5 -13  131.00    4.37
   5   6  13  144.24    9.37
  -5   6  13  141.54    5.40
   5   6  13  135.90    4.56
   5   6  13  136.31    4.89
   6   5  13  142.36    9.55
   5   6 -13  130.72    4.43
  -5   6 -13  144.03   10.69
   5   6 -13  143.91   11.39
   6   5  13  127.48    4.60
  -6   5  13  141.37    4.77
  -5  -6  13  134.90    4.88
  -6   5 -13  136.80   10.48
   6   5 -13  146.11   11.28
   5   6  13  146.34    9.84
   6   5  13  128.07    4.48
  -5  -6 -13  151.91   10.63
   5  -6  13  135.21    4.92
  -5   6  13  140.26    4.65
  -5  -6  13  125.02    4.94
   6  -5  13  133.29    4.54
   6  -5  14   -0.18    0.65
  -5  -6  14    0.58    1.07
   6   5  14    0.20    1.54
  -6   5  14    0.39    0.73
   6   5 -14   -0.72    2.08
   5   6  14   -0.07    0.85
   5   6  14    0.97    1.43
  -5   6  14    0.27    0.95
  -5   6 -14   -0.18    1.75
   5   6  14    0.98    1.39
   5   6  14    1.69    1.00
   6   5  14    0.82    0.82
  -6  -5  14    0.67    0.84
   5  -6  14    0.89    0.80
  -6   5 -14    0.30    2.03
   5   6 -14    0.39    2.30
   5  -6 -14    0.91    1.68
   6   5  14    0.11    0.79
  -5  -6  14    1.01    0.80
  -5  -6 -14    1.04    1.89
  -6   5  14    0.05    1.47
   6   5 -14    0.33    0.72
   5   6 -14    1.00    0.88
  -5   6  15   26.50    2.34
   5   6  15   26.68    4.25
   6   5 -15   25.63    2.11
   5   6  15   25.68    2.29
  -5  -6  15   24.94    2.22
   6  -5  15   20.44    3.85
   6   5 -15   22.73    5.11
  -6   5  15   24.79    2.34
   6  -5  15   22.56    1.92
   6  -5 -15   24.76    5.36
  -6   5 -15   24.65    4.86
  -5   6 -15   24.36    4.92
   5   6 -15   28.05    5.39
   6   5  15   25.12    2.17
   6   5  15   25.02    4.32
  -6   5  15   26.31    2.67
   5   6  15   24.16    2.06
  -5  -6 -15   28.12    5.14
  -5   6  15   24.73    2.46
   5   6 -15   26.68    2.24
  -5  -6  15   24.17    2.24
   5  -6  15   24.81    2.16
  -6  -5  15   22.79    2.09
   6   5  15   24.43    2.05
   6   5 -16    0.82    0.89
   6  -5 -16    3.58    2.13
  -5   6 -16    0.07    1.62
   6   5  16    0.82    0.83
  -5   6  16    0.55    1.31
  -5   6  16    0.41    0.98
  -6   5  16    0.31    0.86
  -6  -5 -16    2.24    2.66
  -6  -5  16    1.12    0.84
   5   6  16    0.62    0.84
   5   6 -16   -0.59    2.32
  -5  -6  16    0.29    0.76
   5   6  16   -0.17    0.98
   5  -6  16    1.43    0.94
   6   5  16    1.01    1.43
   6   5 -16    2.22    2.01
   5   6 -16    1.40    0.88
   6  -5  16    1.83    0.81
  -6   5 -16    0.07    1.86
   5   6  16   -1.27    1.73
  -6   5  16   -0.46    2.29
   6   5  16    0.42    0.77
  -5  -6 -16    1.96    2.18
   5   6  17   52.14    3.39
   6   5  17   51.32    2.93
   6  -5  17   54.36    3.08
   6   5  17   50.72    6.15
   6   5  17   48.49    3.12
  -6   5 -17   51.84    7.07
   5  -6  17   57.00    3.31
   5   6 -17   48.45    7.31
  -5  -6 -17   55.13    7.15
   5   6  17   54.43    6.51
   5   6  17   56.55    3.09
   6   5 -17   58.87    8.14
   5   6 -17   51.39    2.87
  -6   5  17   49.67    3.39
  -5   6  17   53.33    3.28
  -5   6 -17   53.36    7.10
  -6  -5 -17   57.53    7.62
  -5   6  17   54.23    3.71
  -5  -6  17   50.29    3.23
  -6   5  17   51.75    3.86
   6   5 -17   53.32    2.90
  -6  -5  17   53.42    3.19
  -6  -5  18    4.17    1.14
  -5  -6  18    2.83    0.98
   5   6 -18    3.72    1.06
   5   6  18    3.13    1.06
   6   5 -18    3.23    1.01
  -6   5  18    2.39    1.03
   5  -6  18    3.76    1.14
   5   6  18    2.28    1.04
  -5   6  18    2.92    1.96
  -6   5  18    5.36    3.35
   6  -5  18    4.70    1.14
   6   5  18    2.33    0.87
   6   5  18    3.01    1.09
  -5   6  18    0.93    1.03
  -6   5  19    4.67    1.31
   6   5  19    5.59    1.24
   6   5  19    7.06    1.27
   5   6  19    4.02    1.15
   5   6  19    5.00    1.23
  -5   6  19    6.34    1.58
  -5   6  19    6.65    2.61
   5  -6  19    4.69    1.18
  -6  -5  19    4.95    1.19
   6  -5  19    4.12    0.99
  -6   5  19    4.50    3.39
  -5  -6  19    5.45    1.29
   6   5  20    0.08    0.82
   6  -5  20    2.51    0.94
  -6  -5  20    0.89    0.89
  -5  -6  20    1.56    1.03
  -5   6  20   -2.14    2.91
   6   5  20    1.24    0.93
  -5   6  20    0.59    1.04
   5  -6  20    1.00    0.79
   5   6  20    0.66    0.90
   5   6  20    1.28    0.87
  -6   5  20    1.63    1.00
   5   6  21    0.45    0.98
   5   6  21    1.36    0.71
  -5   6  21   -0.19    3.01
   6   5  21    0.77    0.69
  -6  -5  21    1.15    0.83
   6   5  21    1.07    0.82
   5  -6  21    1.17    0.86
  -6   5  21    0.36    0.88
   6  -5  21    0.90    0.76
  -5   6  21    0.19    0.95
  -5  -6  21    0.70    0.86
   5   6  22    0.32    0.65
   6  -5  22    0.27    0.71
  -6  -5  22   -0.14    0.73
  -6   5  22   -0.41    0.78
  -5  -6  22    1.06    0.77
   5  -6  22    0.20    0.71
   6   5  22    0.18    0.78
   6   5  22   -0.24    0.67
   5   6  22    0.86    0.89
  -6  -5  23   22.46    1.77
  -5  -6  23   22.02    1.81
   6  -5  23   23.41    1.75
   5   6  23   22.30    1.48
   5  -6  23   23.40    1.83
   6  -5  24    2.82    0.73
  -6  -5  24    3.09    0.78
   5  -6  24    2.46    0.72
  -5  -6  24    3.01    0.84
  -5  -6  25   15.95    1.26
  -6  -5  25   13.50    1.09
   6  -5  25   14.14    1.14
   5  -6  25   15.69    1.25
   6   6   0  114.04    4.47
   6   6   0  119.69    6.78
  -6  -6   0  112.82    7.98
  -6   6   0  117.24    5.20
  -6  -6   1    0.98    2.21
  -6  -6  -1   -2.24    2.60
   6   6   1    1.10    0.80
  -6   6  -1    1.36    0.79
   6   6  -1    0.73    1.37
   6   6   1    1.35    1.32
  -6   6   1    1.46    0.98
  -6  -6  -2 1037.80   24.60
  -6   6  -2 1046.22   16.69
  -6   6   2 1083.52   18.79
  -6  -6   2 1032.74   25.62
   6   6   2 1034.81   20.53
  -6   6  -3    0.03    0.72
   6   6   3    0.22    1.13
  -6  -6   3    2.60    2.21
  -6  -6  -3   -0.48    1.97
  -6   6   3   -0.12    0.90
   6   6  -3    0.43    1.10
   6   6   3   -0.19    0.80
  -6   6  -3    1.82    2.31
  -6   6  -4  118.44    8.14
  -6  -6   4  107.28    8.28
  -6  -6  -4  121.86    8.35
  -6   6   4  112.14    6.13
   6   6  -4  101.04    6.45
  -6   6  -4  102.93    4.57
   6   6   4  105.76    6.17
   6   6   4  113.01    6.01
   6   6   5   -0.25    0.97
   6   6  -5   -0.83    1.56
  -6   6   5   -1.33    1.36
  -6  -6   5   -0.22    2.00
   6   6   5    0.94    1.38
  -6   6  -5    0.26    1.53
  -6  -6  -5   -1.10    1.92
  -6   6   6   15.77    2.74
   6   6   6   19.20    3.06
   6   6   6   14.78    2.58
  -6  -6  -6   15.65    3.26
   6   6  -6   14.21    2.89
  -6  -6   6   18.64    3.93
  -6   6  -6   15.23    3.49
  -6  -6   7   -0.86    2.03
   6   6   7   -0.53    1.38
  -6   6  -7   -0.78    1.48
   6   6  -7    2.08    1.76
  -6   6   7    1.08    1.20
   6   6   7    0.51    1.02
  -6  -6  -7    1.24    1.71
   6   6   8  127.28    7.44
   6   6  -8  127.37    8.73
   6   6   8  132.75    7.68
  -6   6   8  135.81    8.28
  -6  -6  -8  134.80    8.99
  -6   6  -8  124.56    8.97
  -6  -6   8  128.06    9.53
  -6   6  -9    0.91    1.96
  -6  -6  -9    0.79    1.78
  -6  -6   9    1.02    1.79
   6   6   9    1.30    1.31
  -6   6   9    0.05    1.42
   6   6  -9   -0.01    1.44
   6   6   9    1.01    1.45
   6   6 -10   49.37    5.97
  -6  -6  10   51.27    6.30
   6   6  10   55.18    5.32
  -6   6 -10   52.22    6.37
   6   6  10   54.02    5.32
  -6  -6 -10   50.35    5.83
   6   6  11    0.38    1.28
   6   6  11    0.66    0.81
   6   6 -11    3.47    0.98
  -6   6  11    0.83    0.98
   6   6 -11    0.34    1.92
  -6   6 -11    1.50    2.18
  -6  -6 -11    1.88    2.25
   6   6  11    2.11    1.65
  -6  -6  11   -0.06    1.96
  -6   6  12    3.75    1.35
   6   6  12    2.28    0.97
   6   6  12    2.42    1.43
   6   6  12    1.17    1.36
  -6   6 -12    2.57    2.03
   6   6 -12    2.31    0.95
   6   6 -12    1.21    1.79
   6  -6  12    2.52    0.79
  -6  -6  12    1.81    1.17
  -6  -6 -12    4.16    2.20
  -6  -6 -13    0.55    2.19
  -6   6 -13    1.18    1.58
   6   6  13   -0.15    1.42
   6   6 -13    0.60    0.92
   6  -6  13    0.60    0.66
  -6   6  13    1.23    1.00
  -6  -6  13   -0.02    0.67
   6   6 -13    1.47    2.04
  -6  -6  13   -0.17    1.35
   6   6  13   -0.35    1.66
   6   6  13    0.38    0.68
   6   6  13   -1.15    0.89
  -6   6  13   -1.21    1.32
   6   6 -14   79.79    9.27
  -6   6  14   75.24    4.08
  -6  -6  14   71.24    3.60
   6  -6  14   76.05    3.62
  -6   6 -14   83.49    8.61
   6   6  14   74.69    3.48
   6   6  14   86.23    7.58
  -6   6  14   79.42    3.76
  -6  -6  14   81.14    3.78
  -6  -6 -14   83.45    8.50
   6   6  14   76.82    3.73
   6   6 -14   74.24    3.46
   6   6 -15    1.37    0.99
   6   6  15   -0.76    1.24
  -6   6 -15   -0.22    2.02
  -6   6  15   -1.19    1.89
   6  -6  15    0.21    0.74
   6   6 -15    2.30    2.30
  -6   6  15    0.33    0.90
   6   6  15   -0.30    0.97
  -6  -6  15    1.25    0.92
  -6  -6 -15   -0.35    2.34
   6   6  15   -0.19    0.83
   6   6  16   49.56    6.06
   6   6 -16   44.02    2.74
  -6   6  16   44.55    3.25
   6   6  16   45.93    3.02
   6   6 -16   42.04    6.74
  -6   6  16   48.11    3.32
   6   6  16   49.71    2.92
  -6   6 -16   41.50    6.33
   6  -6  16   43.80    2.79
  -6  -6 -16   47.99    6.83
  -6  -6  16   46.46    2.98
   6  -6  17    1.36    0.88
  -6   6  17    0.41    1.09
  -6  -6  17    0.17    0.75
   6   6  17    1.17    1.05
   6   6  17    1.66    1.01
  -6   6  17    0.95    2.77
   6   6 -17    1.77    1.04
  -6  -6  18    6.41    1.32
   6  -6  18    7.82    1.32
   6   6 -18    9.97    1.53
   6   6  18    6.52    1.39
  -6   6  18    8.20    1.75
   6   6  18    8.90    1.49
  -6   6  18    5.33    3.41
   6   6  19   -0.99    1.00
   6   6 -19    0.90    0.81
  -6   6  19   -0.44    0.92
  -6   6  19    1.03    3.28
   6   6  19   -0.35    0.85
   6  -6  19   -0.47    0.75
  -6  -6  19   -0.05    0.81
   6   6  20  169.97    5.82
  -6   6  20  176.50    6.25
  -6  -6  20  175.41    5.52
  -6   6  20  174.75    6.19
   6   6  20  182.02    5.19
   6  -6  20  180.76    5.51
  -6  -6  21    0.37    0.81
   6  -6  21   -0.78    0.76
   6   6  21    0.29    0.68
   6  -6  22   50.47    2.66
   6   6  22   47.43    2.29
  -6  -6  22   49.06    2.64
   6   6  23   -0.62    0.48
  -6  -6  23    0.00    0.58
   6  -6  23    0.21    0.56
  -6  -6  24   38.71    1.94
   6  -6  24   41.14    1.99
   6  -6  25    0.17    0.39
   0   7   0    1.30    0.96
   0   7   0    3.86    2.47
   0  -7   0    2.82    2.26
  -7   0   0    2.03    1.51
  -7   0   1    1.69    1.22
   0  -7  -1    2.56    1.97
   0  -7   1    3.28    1.79
   0   7  -1    2.59    1.13
   0   7  -1    3.37    1.90
  -7   0  -1    1.51    1.19
   0   7   1    2.63    1.16
   0   7   1    4.69    2.23
   0  -7   2    0.84    1.75
   0   7   2    1.28    1.85
   0  -7  -2    0.29    1.31
   0   7  -2    0.66    1.00
   0   7   2    0.93    1.08
   0   7  -2    1.36    2.01
  -7   0  -2   -0.17    1.07
  -7   0   2   -0.47    0.99
  -7   0   3  955.48   16.74
   0  -7  -3  970.50   19.51
   0   7  -3  955.05   17.74
   0  -7   3  965.40   21.33
   0   7   3  954.03   16.58
   0   7   3  968.53   20.32
  -7   0   4   -0.18    0.99
   0  -7  -4    9.00    2.71
   0  -7   4    3.51    2.76
   0   7   4    4.83    2.13
   0   7   4    6.64    2.99
   0   7  -4    2.41    1.85
   0   7  -5  247.48    9.34
  -7   0  -5  246.63    9.83
   0   7   5  245.14   10.33
   0  -7   5  263.38   11.33
  -7   0   5  244.61    7.65
   0   7   5  243.02    8.47
   0  -7  -5  237.37    9.22
   0  -7  -6    0.74    1.24
   0  -7   6    1.66    2.03
  -7   0  -6    1.33    1.86
   0   7  -6    7.32    2.65
  -7   0   6    1.09    1.01
   0   7   6    0.67    1.20
   0   7   6    0.80    1.63
   0  -7   7  268.90   12.08
   0  -7  -7  259.01   10.19
   0   7   7  247.83    9.37
  -7   0  -7  241.54   10.32
   0   7   7  250.46   10.76
   0   7  -7  266.74   10.74
   0  -7  -8    0.50    1.36
  -7   0  -8    0.73    1.62
   0   7  -8    1.24    1.57
   0   7   8    0.72    1.54
   0   7   8    1.95    1.43
   0   7   9  342.70   13.59
   0   7  -9  331.10   13.45
  -7   0  -9  319.25   12.88
   0   7   9  342.13   12.01
   0  -7  -9  342.86   12.43
   0   7 -10   -0.11    1.67
   0   7  10    0.10    1.19
   0  -7 -10    0.25    1.14
   0   7  10    0.49    1.83
  -7   0 -10    0.63    1.51
   0   7 -11  549.65   19.28
   0   7  11  541.40   16.48
   0  -7 -11  579.86   17.46
   0   7  11  568.72   19.13
  -7   0 -11  540.67   17.98
   0   7  12    2.35    2.34
  -7   0 -12    0.48    1.28
   0   7  12   -0.73    1.64
   0  -7 -12    0.79    1.20
   0   7 -12   -0.77    1.91
   0   7  13  168.14    5.98
   0   7  13  167.09    4.94
   7   0  13  177.02   10.62
   0   7 -13  167.68   11.40
  -7   0 -13  172.69   10.74
   0  -7  13  157.30    5.41
   0  -7 -13  183.42   10.26
   0   7  13  176.25   11.49
   0   7  13  168.90    9.60
   7   0  14   -1.13    1.91
   0   7  14    0.47    1.40
   0   7 -14   -0.22    0.66
  -7   0 -14    0.08    1.37
   7   0 -14    1.53    2.48
   0   7  14    0.27    0.72
   0   7 -14    3.61    2.99
   0   7  14   -0.95    2.29
   0   7  14    1.28    0.87
   0  -7  14   -0.38    1.28
   0   7  15   43.63    2.63
  -7   0 -15   42.54    5.72
   7   0 -15   37.45    6.65
   0  -7  15   42.87    3.19
   0  -7  15   48.35    3.19
   0   7  15   42.99    5.33
   0   7  15   40.34    6.08
   7   0  15   46.16    5.81
   0   7  15   41.91    3.17
   0   7 -15   45.45    6.36
  -7   0 -16    1.48    1.49
   7   0  16    0.95    1.81
   0  -7  16   -1.01    1.07
   0   7  16    0.48    0.94
   0  -7  16    1.51    1.41
   0   7 -16    0.11    1.82
   7   0 -16   -0.87    2.29
   0   7  16    0.06    1.41
   0   7  16    0.46    1.07
  -7   0  17   25.36    2.15
   7   0  17   23.16    4.35
   0   7  17   24.78    2.14
   0   7  17   24.31    2.65
   0  -7  17   28.77    2.67
   7   0 -17   27.39    5.68
   0   7  17   23.53    4.20
   7   0  17   25.91    2.09
   0  -7  17   24.35    2.40
   0   7 -17   26.98    5.40
  -7   0  18    0.32    0.79
   7   0  18    0.33    0.67
   0   7  18   -0.14    1.24
   0   7  18    1.20    0.96
   0  -7  18    2.07    1.40
   0  -7  18   -0.65    1.08
  -7   0  19   30.51    2.42
   0   7  19   32.79    3.04
   7   0  19   31.52    2.31
   0   7  19   30.61    2.29
   0  -7  19   31.50    2.77
   0   7  20    1.85    1.50
   7   0  20    0.01    0.75
   0  -7  20   -0.92    1.09
  -7   0  20    0.08    0.80
   0   7  20    0.21    0.91
   0  -7  21    2.52    1.26
   0   7  21    2.26    1.28
   0   7  21    1.46    0.98
  -7   0  21    2.10    0.94
   7   0  21    1.59    0.89
   0   7  22    0.06    0.94
   0   7  22   -0.31    1.16
   7   0  22    0.07    0.71
   0  -7  22   -0.33    1.15
  -7   0  22   -0.42    0.76
   7   0  23    2.66    0.80
   0  -7  23    4.55    1.24
  -7   0  23    1.77    0.69
   0   7  23    2.46    1.06
   0  -7  24    0.48    0.77
   7   0  24   -0.46    0.60
   0  -7  25   31.79    2.03
   0  -7  26   -0.69    0.57
   1   7   0 1449.96   17.80
  -1   7   0 1497.15   21.32
   1   7   0 1507.75   19.22
   1   7   0 1528.99   26.28
   1  -7   0 1530.33   24.96
  -1  -7   0 1562.87   27.33
  -7  -1   0 1547.06   24.37
  -1   7   0 1509.37   25.49
  -7   1   0 1485.63   20.80
  -7   1  -1   78.84    4.25
  -1  -7  -1   84.42    5.96
   1  -7   1   77.14    5.26
  -1   7  -1   79.82    4.41
  -7  -1  -1   80.24    5.14
  -1  -7   1   79.50    6.02
   1   7  -1   73.92    3.65
   1  -7  -1   79.96    5.19
   1   7  -1   78.76    5.79
   1   7   1   76.24    5.52
   1   7   1   80.87    3.94
  -1   7   1   79.93    5.41
  -7   1   1   78.90    3.84
  -7  -1   1   75.29    4.78
  -1   7  -1   78.42    5.37
  -1   7  -2  957.74   20.20
  -7  -1  -2  943.31   18.44
  -1   7   2 1005.30   20.15
   1   7  -2  941.90   16.07
   1  -7  -2  987.09   18.97
  -7  -1   2  913.15   18.04
  -1   7  -2  960.81   17.60
   1   7   2  958.12   15.96
  -1   7   2  959.87   16.33
  -7   1   2  913.45   14.56
  -1  -7  -2  987.95   20.60
   1   7   2  973.84   20.38
  -1  -7   2 1000.59   21.81
   1  -7   2 1018.88   20.62
  -7  -1  -3    3.62    1.72
   1   7   3    2.80    1.22
  -1   7   3    4.04    1.42
  -1   7  -3    3.10    1.49
  -1   7   3    3.26    1.73
   1   7   3    4.34    2.07
  -7   1   3    4.10    1.01
   1  -7   3    3.28    1.90
  -1  -7   3    4.83    2.31
   1   7  -3    3.02    1.07
   1  -7  -3    3.30    1.84
  -1  -7  -3    3.18    1.86
  -7  -1   3    4.50    1.63
  -1   7  -4  406.61   11.89
  -7  -1   4  381.82   11.01
  -1   7   4  403.84   13.03
   1  -7   4  411.36   13.38
   1  -7  -4  390.12   11.17
   1   7   4  403.81   12.83
  -7   1  -4  394.17   13.00
   1   7   4  396.29   10.53
  -1  -7  -4  404.40   12.68
  -1   7   4  399.62   10.53
  -7   1   4  352.12    7.45
  -1  -7   4  413.48   14.12
   1   7  -4  404.83   11.20
  -1   7   5   59.03    4.23
   1   7   5   58.88    4.17
  -7   1  -5   56.66    5.17
  -1   7  -5   57.13    4.70
   1   7   5   58.71    5.21
   1   7  -5   60.75    4.58
   1  -7   5   61.48    5.47
  -1  -7   5   62.08    5.92
  -7  -1   5   61.75    4.47
   1  -7  -5   56.54    4.24
  -1  -7  -5   59.32    4.94
  -1   7   5   62.72    5.13
   1   7   6  394.95   13.29
  -7  -1   6  372.77   11.26
  -7  -1  -6  354.23   11.83
  -7   1  -6  369.65   12.83
   1  -7  -6  381.02   11.32
  -1  -7   6  383.69   14.64
   1   7   6  396.61   11.54
  -1   7   6  394.14   13.20
   1   7  -6  380.69   12.26
  -1   7   6  378.97   11.08
   1  -7   6  361.01   13.37
  -1   7  -6  390.18   12.69
  -1  -7  -6  405.54   13.27
   1  -7  -7   45.03    4.07
  -7  -1   7   42.40    3.81
  -7  -1  -7   39.97    4.27
  -1   7   7   49.67    4.97
   1   7  -7   47.33    4.63
   1   7   7   45.31    4.09
   1   7   7   45.91    4.81
  -1   7  -7   47.70    4.75
  -1  -7   7   47.62    5.38
  -1   7   7   44.11    4.19
  -1  -7  -7   43.84    4.60
  -7   1  -7   47.08    5.07
  -7   1  -8  218.86   10.69
   1   7   8  235.92   10.82
  -1  -7  -8  241.50   10.54
  -1   7   8  254.62   11.11
  -7  -1  -8  217.36    9.74
   1   7  -8  237.89   10.84
  -1   7   8  226.06    9.39
   1  -7  -8  255.48    9.77
   1   7   8  242.61    9.60
  -1   7  -8  241.97   10.91
  -1  -7   8  253.14   12.27
  -7  -1  -9   47.08    4.75
   1  -7  -9   51.30    4.49
  -7   1  -9   50.51    5.47
  -1   7   9   49.69    5.29
   1   7   9   47.36    5.11
  -1   7  -9   53.92    5.44
  -1  -7  -9   51.20    5.03
  -1   7   9   49.35    4.61
   1   7   9   52.49    4.72
   1   7  -9   51.96    5.43
  -1   7 -10  152.02    9.42
  -1   7  10  160.67    9.65
   1   7 -10  148.08    9.30
  -1   7  10  152.85    8.29
   1   7  10  164.79    9.66
  -7   1 -10  137.81    8.91
   1   7  10  163.15    8.43
  -7  -1 -10  141.40    8.44
   1  -7 -10  163.86    8.30
  -1  -7 -10  158.12    8.91
  -7  -1 -11   47.95    5.12
  -1   7  11   48.09    4.92
  -1   7  11   49.52    5.84
  -7   1 -11   52.04    5.70
  -1   7 -11   52.14    6.01
   1   7 -11   46.19    5.67
   1   7  11   50.53    5.67
   1   7  11   48.01    4.92
   1  -7 -11   49.29    4.84
  -1  -7 -11   54.86    5.61
   1   7  12   58.88    6.38
  -7  -1 -12   56.63    5.63
  -1   7  12   54.84    6.13
  -1   7  12   56.16    5.28
   1   7  12   56.39    5.43
  -1   7 -12   55.96    6.36
   1   7 -12   54.67    6.25
  -7   1 -12   54.19    6.11
  -1  -7 -12   59.10    5.79
   7   1  12   60.69    6.10
   1   7  13    1.86    1.56
  -1   7  13    0.23    1.48
  -1  -7  13   -0.51    1.13
  -1  -7 -13    1.05    1.61
  -1   7  13    1.31    0.93
   7  -1  13    2.40    1.98
   1   7  13    0.28    1.66
  -7  -1 -13   -0.52    1.32
  -1   7  13    1.63    1.84
  -1   7 -13   -1.72    1.58
   1   7 -13    0.64    1.80
   1   7  13    1.10    0.77
  -1   7  13    0.62    0.85
   7   1  13    1.20    1.78
   1  -7  13    2.17    1.35
  -7   1 -13    1.01    1.64
   1   7  13    1.28    0.87
   1   7  14   20.61    1.82
   1   7 -14   18.52    1.66
  -1   7  14   19.84    4.22
   1   7  14   19.48    3.40
  -1  -7  14   18.82    2.09
  -7   1 -14   20.68    4.05
   1   7  14   19.17    2.08
   7   1 -14   20.95    5.07
  -1   7 -14   22.09    4.38
  -1   7  14   18.53    1.71
   1   7  14   23.96    4.54
   7   1  14   18.29    3.71
   7  -1  14   17.19    3.52
  -1  -7 -14   22.53    3.89
   1  -7  14   21.13    2.18
   1   7 -14   20.92    4.36
  -1   7  14   19.94    3.51
  -7  -1 -14   19.42    3.60
  -1   7  14   19.12    2.12
  -1   7  15    4.17    1.15
  -1   7 -15    5.44    3.06
   1   7  15    4.10    2.04
  -1   7  15    2.67    1.89
  -1  -7 -15    5.53    2.61
  -1  -7  15    4.86    1.49
   1   7  15    3.68    1.26
  -1   7  15    6.65    3.08
   1   7 -15    3.10    0.95
   1  -7  15    2.88    1.51
  -7   1 -15    3.13    2.16
   1  -7  15    3.06    1.23
   1   7  15    2.86    2.49
   7   1 -15    3.72    3.11
   7  -1 -15    3.16    2.85
   1   7 -15    3.12    2.40
  -1   7  15    4.04    1.43
  -1  -7  15    2.64    1.31
   7  -1  15    2.72    1.91
   7   1  15    4.79    2.41
   1   7  15    4.07    1.15
   1   7  16   58.52    3.16
  -1  -7  16   60.31    3.74
   1  -7  16   61.54    3.77
   1   7  16   59.67    3.76
   7  -1 -16   58.06    8.36
   7   1 -16   57.17    8.15
  -7   1 -16   54.42    6.73
  -1   7  16   60.39    3.08
   7   1  16   57.61    3.00
   7  -1  16   55.30    6.43
  -1   7 -16   62.70    7.64
   1   7 -16   56.22    7.47
  -1   7  16   58.35    6.07
   1   7  16   59.13    6.19
   1  -7  16   58.82    3.43
   7   1  16   58.33    6.51
  -1   7  16   59.28    3.91
   7  -1  16   57.82    2.98
  -1  -7  16   58.43    3.45
  -7   1  17    0.74    0.73
   7   1  17    2.58    1.88
   7  -1  17   -0.03    0.62
  -1  -7  17    1.02    0.92
  -1   7  17    2.73    1.82
   7   1 -17   -1.54    2.78
   1  -7  17    2.29    1.53
  -7   1 -17    2.38    1.97
   1   7  17    0.40    1.26
   1  -7  17   -1.05    1.14
  -7  -1  17    0.23    0.69
  -1   7 -17   -0.20    2.18
   1   7 -17    1.94    2.52
  -1   7  17    1.01    1.08
  -1  -7  17    0.18    1.32
   1   7  17    0.11    1.05
   7  -1 -17    0.64    1.92
   7  -1  17   -0.75    1.48
  -1   7  17    0.48    0.90
   7   1  17    0.27    0.63
   1   7  17    0.69    0.99
  -7   1  18  123.67    4.87
   1   7  18  131.59    4.72
   7   1  18  120.38    4.57
  -1  -7  18  135.77    5.53
   1  -7  18  135.42    5.51
   1   7  18  135.85    5.82
  -1  -7  18  125.99    4.96
  -7  -1  18  123.92    4.76
  -1   7  18  141.14    6.04
   7  -1  18  120.28    4.55
  -1   7  18  133.53    4.69
   7  -1  19    1.46    0.84
  -1  -7  19    2.31    1.33
   1   7  19    1.38    1.00
   1  -7  19    0.84    0.94
  -7  -1  19    1.31    0.87
  -7   1  19    0.40    0.79
   1   7  19   -0.04    1.03
  -1  -7  19    1.92    1.19
  -1   7  19    0.95    0.95
   7   1  19    0.90    0.81
  -1   7  19    0.67    1.26
   7   1  20  173.02    5.56
   1  -7  20  190.18    6.41
  -1   7  20  191.60    7.15
   7  -1  20  176.04    5.43
  -7   1  20  177.31    5.86
   1   7  20  182.69    5.42
  -1  -7  20  186.18    6.43
  -7  -1  20  171.52    5.64
  -1   7  20  182.07    5.44
   1   7  20  185.17    6.96
  -1   7  21    0.66    1.02
   7  -1  21   -0.17    0.63
   7   1  21   -0.37    0.80
  -1  -7  21    2.06    1.11
   1  -7  21    1.00    1.12
  -7  -1  21    0.11    0.73
   1   7  21    0.35    0.92
   1   7  21    0.11    1.16
  -1   7  21    0.86    1.19
  -7   1  21    0.40    0.73
  -1  -7  22  170.74    5.67
   7  -1  22  150.76    4.83
  -7  -1  22  149.04    4.94
   1  -7  22  169.23    5.64
  -1   7  22  173.22    6.39
   1   7  22  169.03    6.23
   1   7  22  154.89    4.65
   7   1  22  156.72    5.03
  -7   1  22  153.32    5.12
  -1   7  22  159.34    4.70
   7   1  23    7.14    1.12
   1   7  23    7.85    1.23
   1  -7  23    8.88    1.44
  -1   7  23    7.40    1.59
   7  -1  23    8.00    1.16
  -7   1  23    6.73    1.12
  -7  -1  23    6.89    1.09
  -1  -7  23    7.67    1.30
   7   1  24   78.31    3.00
   1  -7  24   92.33    3.71
  -1   7  24   76.18    3.09
   1   7  24   78.33    2.78
   7  -1  24   80.46    3.04
  -1  -7  24   90.50    3.71
   1  -7  25    2.78    0.81
  -1  -7  25    1.09    0.67
  -1  -7  26   28.76    1.70
   1  -7  26   29.96    1.74
  -2  -7   0  262.71   11.37
   2   7   0  241.38    6.37
  -2   7   0  267.10   10.01
  -7   2   0  252.88    6.76
   7   2   0  235.86    6.02
   2   7   0  270.07   10.75
  -7  -2   0  260.56    9.73
  -2   7   0  254.67    8.52
   2  -7   0  237.65    8.75
   2  -7   1    5.66    1.80
   2   7   1    3.42    1.02
  -2   7  -1    2.98    1.52
   2   7  -1    3.86    2.09
  -7   2   1    2.39    0.79
  -7  -2  -1    2.66    1.64
   2   7  -1    4.59    0.98
  -7  -2   1    3.33    1.58
   7   2   1    2.83    0.80
   2   7   1    4.87    2.28
  -2  -7   1    4.55    2.24
  -2   7  -1    3.73    1.42
  -2  -7  -1    2.73    1.89
  -2   7   1    3.15    1.74
   2  -7  -1    3.76    1.57
  -2   7   2   47.05    4.62
   7   2   2   39.04    2.19
  -2  -7  -2   44.35    4.77
  -2   7  -2   44.37    4.37
   2   7   2   45.54    3.36
  -2   7  -2   48.28    4.16
   2   7  -2   41.77    3.12
   2  -7   2   47.58    4.37
   2  -7  -2   41.14    3.53
  -2  -7   2   49.80    5.38
  -7  -2   2   39.71    4.20
   2   7   2   47.24    4.79
  -7  -2  -2   42.38    4.40
   2   7  -3   78.67    4.52
   2   7   3   71.06    4.16
  -7  -2  -3   77.37    5.71
   2   7   3   74.05    5.53
  -2  -7  -3   76.67    5.81
   7   2   3   70.50    2.82
  -2  -7   3   83.05    6.43
  -2   7  -3   77.74    5.26
  -2   7  -3   73.80    5.30
   2  -7   3   71.82    5.17
   2  -7  -3   70.40    4.36
  -7  -2   3   75.03    5.45
  -2   7   3   72.05    5.21
   2  -7   4  114.17    6.96
  -2   7   4  119.69    6.04
  -7  -2  -4  125.64    6.95
  -2   7  -4  113.20    6.61
   7   2   4  106.23    3.76
   2  -7  -4  111.70    5.46
  -2  -7  -4  112.20    7.29
   2   7  -4  110.20    5.81
  -2   7   4  128.51    7.11
   2   7   4  115.63    7.14
  -2  -7   4  119.75    8.21
  -7  -2   4  113.16    6.70
   2   7   4  119.50    5.72
  -7   2  -4  113.35    7.48
  -2  -7  -5   17.32    3.15
  -2   7  -5   19.03    3.01
   2  -7  -5   21.53    5.47
  -7   2  -5   18.59    3.77
   2   7   5   16.17    2.89
   7   2   5   15.35    1.59
   2   7   5   17.39    2.35
  -2  -7   5   18.65    3.51
  -2   7   5   15.76    2.45
  -7  -2   5   17.49    2.77
  -2   7   5   15.09    2.76
   2   7  -5   17.21    2.72
  -2   7   6   29.30    3.25
  -2   7   6   30.81    3.96
  -2  -7  -6   25.45    3.58
  -7   2  -6   22.19    3.54
   2   7   6   30.97    3.34
  -2   7  -6   25.89    3.53
   2   7  -6   24.91    3.27
   7   2   6   27.82    2.26
  -2  -7   6   27.22    4.42
   2  -7  -6   24.44    2.61
   2   7   6   30.10    3.90
  -7  -2   6   28.01    3.58
   2   7  -7   48.42    4.81
   2   7   7   45.11    4.73
   2  -7  -7   38.56    3.28
  -7   2  -7   46.82    5.51
   2   7   7   41.86    4.02
  -7  -2  -7   36.21    3.85
  -7  -2   7   40.87    4.14
  -2  -7   7   45.35    5.37
  -2  -7  -7   42.10    4.45
  -2   7   7   38.54    3.77
  -2   7   7   40.16    4.43
  -2   7  -7   44.26    4.66
   2  -7  -8    7.86    1.64
  -2  -7  -8   10.05    2.62
   2   7   8    9.67    2.19
   2   7   8    9.03    2.63
  -2   7   8   10.05    2.85
   2   7  -8    7.50    2.30
  -7   2  -8    6.30    2.24
  -2   7  -8    9.11    2.82
  -7  -2   8    9.58    2.33
  -2   7   8    9.99    2.22
  -2  -7   8    8.01    3.14
  -7  -2  -8    6.54    1.86
   2   7   9  188.33    8.99
  -7   2  -9  193.15   10.61
  -2   7   9  192.76   10.15
  -2  -7  -9  184.27    9.89
  -2   7  -9  190.83   10.32
   2   7  -9  184.55   10.01
  -2  -7   9  194.07   11.26
  -2   7   9  178.31    8.50
   2   7   9  186.04    9.93
  -7  -2  -9  186.73    8.70
  -2   7 -10    0.36    1.64
  -2  -7 -10   -0.26    1.35
  -2   7  10    1.36    1.67
   2   7  10    0.02    1.18
   2   7  10    0.14    1.48
  -7   2 -10    0.09    1.44
   7   2  10    0.85    1.64
   2   7 -10   -0.57    1.83
  -2   7  10    1.95    1.61
  -7  -2 -10    0.75    1.17
   2   7  11  330.54   12.98
  -2   7  11  319.23   12.42
   2   7  11  340.25   14.61
  -7  -2 -11  311.46   12.28
  -2   7 -11  316.67   14.56
  -2   7  11  351.45   15.07
  -7   2 -11  318.91   14.37
  -2  -7 -11  335.86   13.90
   2   7 -11  328.48   14.81
   7   2  11  331.75   14.00
  -2   7 -12    4.28    2.51
  -7   2 -12    2.84    2.03
   7   2  12    2.69    1.88
   2   7 -12    2.31    1.74
  -2  -7 -12    3.28    1.86
   2   7  12    4.05    1.91
  -7  -2 -12    1.17    1.34
  -2   7  12    3.02    1.76
  -2   7  12    3.24    2.14
   2   7  12    2.96    1.87
  -2   7  13  223.72   13.21
  -7   2 -13  206.44   12.48
  -2  -7  13  209.96    6.19
   7   2  13  218.76   11.85
   2   7 -13  197.32    5.37
  -2   7 -13  222.98   12.94
   7   2 -13  226.27   14.89
   2  -7  13  219.95    6.30
   2   7  13  205.27    6.48
   2   7  13  211.57    5.66
   2   7  13  224.03   12.79
   2   7 -13  214.26   12.94
  -2   7  13  208.90   10.58
  -7   2  13  203.20    5.79
  -2   7  13  208.52    5.56
   2   7  13  216.25   11.14
  -2   7  13  221.29    6.95
  -2  -7 -13  225.27   12.14
   2   7 -14   -0.95    2.02
   2   7  14    1.33    1.59
  -2   7  14    0.51    0.82
   7  -2  14   -0.48    1.59
   2   7  14   -0.18    0.76
  -2  -7 -14    1.12    1.34
  -7   2 -14    0.33    1.78
   2  -7  14    0.26    1.32
  -2   7  14   -0.17    1.43
  -2  -7  14   -0.05    1.22
  -2   7 -14    1.89    2.08
  -2   7  14    0.59    0.91
   2   7  14    0.18    1.64
   2   7 -14   -0.04    0.75
   7   2  14    0.16    1.46
  -2   7  14   -0.38    1.58
   2   7  14   -0.48    0.81
   7   2  14    0.97    0.83
   7   2 -14   -0.10    2.22
   2   7  15  100.54    9.35
  -2   7  15  108.07    5.06
   2   7  15   98.90    4.72
   7   2  15   89.50    3.63
   7   2 -15   99.39   10.42
   7  -2  15  101.68    8.46
   2  -7  15   95.85    4.37
   2   7  15   99.73    4.01
  -2  -7  15  101.33    4.91
  -2  -7 -15  106.25    9.05
   2  -7  15  105.38    4.83
  -2   7 -15  103.29    9.51
   2   7 -15  104.84    9.81
   7  -2 -15  101.95   10.93
  -7   2 -15   96.29    8.95
   2   7 -15   93.06    3.78
  -2   7  15  102.44    7.82
   7   2  15  102.76    8.60
  -2   7  15   98.92    4.00
   2   7  15  104.70    8.24
  -2  -7  15   97.48    4.46
   2   7  16    0.03    0.88
  -7   2 -16    1.18    1.86
  -2   7  16    1.94    1.86
   7  -2  16    0.29    0.59
   2   7  16    0.14    1.56
   7   2  16    0.21    0.63
   7  -2  16    1.79    1.59
  -2  -7  16    0.69    1.37
  -2   7  16    1.43    1.04
   7   2  16    0.12    1.39
  -2   7  16   -0.08    1.09
  -2   7 -16    0.79    1.65
   2   7 -16    0.71    2.46
  -2  -7 -16   -1.38    1.79
   2   7 -16    0.82    0.82
   2  -7  16   -0.52    0.94
   2  -7  16    6.46    2.11
   7   2 -16    0.80    0.78
   2   7  16    0.45    1.02
   7   2  16   -0.10    0.76
   7  -2 -16    1.03    1.95
  -2  -7  16    0.38    1.06
  -2  -7  17   83.09    4.08
  -7   2  17   81.85    4.02
   2   7  17   83.78    7.81
  -2   7  17   85.76    3.82
   7   2  17   82.47    3.36
   7   2  17   85.08    8.04
   2   7  17   83.93    3.78
   7  -2  17   83.68    3.68
   2  -7  17   89.13    4.40
   7  -2  17   81.08    7.63
  -2   7  17   92.19    4.93
   2   7  17   83.71    4.55
  -2  -7  17   90.16    4.51
   7   2  17   84.42    3.81
  -2   7 -17   81.05    9.21
   7   2 -17   94.89   10.43
   7  -2 -17   78.93    9.69
  -2   7  17   75.74    7.05
  -7  -2  17   77.92    3.71
   2   7 -17   85.42    9.44
  -7   2 -17   77.51    8.44
  -7  -2  18   15.19    1.75
   2   7  18   17.79    2.27
  -2   7  18   18.36    1.95
  -2  -7  18   18.52    2.27
  -2  -7  18   15.37    1.95
   2  -7  18   19.44    2.18
   2   7  18   18.73    1.90
   7   2  18   15.50    1.72
  -7   2  18   16.95    1.97
   7  -2  18   16.47    1.72
  -2   7  18   20.14    2.54
  -7   2  19    1.97    0.97
  -7  -2  19    1.43    0.77
  -2   7  19    1.43    1.05
   2   7  19    1.55    0.96
   7  -2  19    0.86    0.69
   2   7  19    1.27    1.21
   7   2  19    1.64    0.79
  -2  -7  19    0.89    1.06
   2  -7  19    2.04    1.17
  -2  -7  19    1.05    1.14
  -2   7  19    2.14    1.27
  -2   7  20    1.98    1.22
  -7   2  20    2.11    0.97
   2  -7  20    1.29    1.07
  -2  -7  20    0.79    0.91
  -2   7  20    1.50    1.23
  -7  -2  20    1.20    0.77
   7  -2  20    0.78    0.79
   2   7  20    1.41    1.16
   7   2  20    1.22    0.83
   2   7  20    1.29    1.00
  -7   2  21    1.65    0.82
  -7  -2  21    1.00    0.75
   2  -7  21    2.34    1.05
  -2   7  21    2.98    1.44
  -2  -7  21    1.74    1.03
  -2   7  21    3.38    1.36
   2   7  21    1.63    1.26
   7   2  21    1.58    0.81
   7  -2  21    0.93    0.69
   2   7  21    2.03    0.92
  -7  -2  22    1.09    0.74
  -2   7  22    2.06    1.50
   2   7  22    2.44    1.29
  -2  -7  22    1.70    0.98
  -7   2  22    1.93    0.86
  -2   7  22    2.19    1.19
   2   7  22    1.14    0.77
   2  -7  22    1.08    0.90
   7  -2  22    1.37    0.77
   7   2  22    3.17    0.91
   2   7  23    3.84    0.96
   7   2  23    3.19    0.87
  -2  -7  23    5.12    1.15
  -2   7  23    6.38    2.10
   7  -2  23    4.14    0.91
  -7  -2  23    4.03    0.93
   2  -7  23    4.93    1.15
  -7   2  23    4.91    1.03
  -2  -7  24    3.41    0.91
   2   7  24    3.49    0.95
   7  -2  24    4.27    0.82
  -2   7  24    3.85    2.11
   7   2  24    3.60    0.80
   2  -7  24    4.94    1.05
   2  -7  25   27.64    1.85
  -2  -7  25   26.13    1.82
   2  -7  26    2.82    0.67
  -2  -7  26    2.28    0.60
  -7   3   0 1742.44   20.95
   3   7   0 1879.69   22.21
   7   3   0 1811.19   23.95
  -3   7   0 1959.30   29.06
  -7  -3   0 1945.30   31.10
   3  -7   0 1891.46   26.58
   3   7   0 1910.15   31.28
  -3  -7   0 1913.90   33.72
  -7  -3   1    8.92    3.81
   3   7  -1    1.22    1.46
   3   7   1    3.66    1.01
   3   7  -1    2.64    0.89
  -3  -7  -1   12.26    3.94
   3   7   1    2.45    1.87
  -3   7  -1    5.71    2.24
   7   3   1    2.55    0.96
  -3  -7   1    7.11    2.77
   3   7  -1    2.92    0.69
  -3   7   1    3.03    1.41
   3  -7   1    2.48    1.27
  -7  -3  -1    6.94    2.66
  -3   7  -1    2.52    1.44
   3  -7  -1    2.95    1.06
   3   7   2  873.83   19.53
  -3  -7   2  938.93   22.66
  -3   7   2  915.69   18.69
   3   7  -2  845.88   14.61
  -3   7  -2  867.80   17.93
   3  -7   2  869.58   17.65
   7   3   2  837.58   13.72
  -3   7  -2  889.74   18.77
  -7  -3   2  844.39   19.72
  -3  -7  -2  863.44   20.70
   3  -7  -2  808.36   14.78
  -7  -3  -2  873.82   19.81
   3   7   2  859.02   14.84
  -3   7  -3   32.63    3.58
  -3  -7   3   33.68    4.45
   3   7   3   31.49    2.85
  -3   7  -3   30.80    3.34
   3   7  -3   27.53    2.68
   3  -7  -3   27.49    2.35
  -7  -3   3   32.49    3.94
  -3  -7  -3   31.59    3.89
  -7  -3  -3   28.87    3.67
  -3   7   3   30.57    3.53
   3   7   3   33.09    3.79
   7   3   3   28.10    2.29
  -7   3  -4  368.46   13.65
   7   3   4  356.70    8.51
  -3   7   4  397.58   12.34
   3   7   4  366.84   10.34
  -3  -7   4  367.43   14.42
   3  -7  -4  333.84    8.30
  -7  -3  -4  355.48   12.50
  -3   7  -4  360.25   11.64
   3   7  -4  364.55   10.60
  -7  -3   4  376.65   13.07
  -3  -7  -4  393.07   13.76
  -3   7  -4  381.02   12.57
   3   7   4  379.38   12.56
  -7  -3   5   19.76    3.24
  -3   7  -5   19.50    3.03
   3   7   5   20.58    3.20
  -3   7   5   20.30    3.12
   7   3   5   18.75    2.02
   3   7  -5   17.32    2.56
  -7   3  -5   20.21    3.50
  -7  -3  -5   14.93    2.73
  -3  -7  -5   18.51    3.66
   3   7   5   20.30    2.69
  -3  -7   5   19.02    3.86
   3   7   6  107.28    6.98
  -3   7   6  117.36    7.06
  -3   7   6  107.38    5.98
  -7   3  -6  110.56    7.76
   7   3   6  104.26    4.88
  -3   7  -6  114.48    7.27
   3   7  -6  114.47    6.76
   3   7   6  110.97    6.05
  -3  -7   6  114.21    8.36
  -7  -3   6  107.09    7.09
  -3  -7  -6  110.36    7.63
  -3   7  -7  103.94    7.27
  -3   7   7  115.39    7.43
  -7   3  -7   96.54    7.48
  -3  -7  -7  102.32    7.28
   7   3   7  103.27    5.20
   3   7   7  107.95    6.42
   3   7   7  106.29    7.00
  -3  -7   7  108.21    8.48
   3   7  -7  103.11    6.96
  -3   7   7  102.61    6.21
  -7  -3   7  105.27    7.17
  -3  -7  -8  168.16    9.64
  -7  -3   8  152.22    8.82
  -3  -7   8  171.96   10.60
  -3   7   8  167.26    9.20
   3   7   8  168.26    8.24
  -3   7  -8  156.38    9.16
   3   7  -8  157.12    8.91
   7   3   8  151.37    6.74
  -3   7   8  152.36    7.79
  -7   3  -8  150.05    9.33
   3   7   8  166.27    9.15
   7   3   9  101.87    7.29
   3   7   9   91.16    6.94
  -3   7  -9   89.16    7.26
  -7   3  -9   84.08    7.48
   3   7  -9   92.93    7.34
  -3   7   9   87.37    6.06
  -7  -3   9   89.49    6.85
  -3  -7   9   92.87    8.20
  -3   7   9   95.51    7.23
  -3  -7  -9   90.99    7.29
   3   7   9   91.64    6.32
   3   7  10    6.42    2.08
  -3   7  10    8.26    2.74
  -3   7 -10    7.21    2.70
  -3   7  10    4.83    1.89
   7   3  10    6.89    2.26
   3   7  10    5.54    2.21
  -7   3 -10    6.25    2.53
   3   7 -10    5.47    2.48
  -3  -7  10    7.63    2.67
  -3  -7 -10    5.41    2.11
  -3   7 -11   10.79    3.57
   7   3  11    9.98    2.77
  -3   7  11   11.85    3.13
  -7   3 -11    8.68    2.71
   3   7  11   12.43    2.91
   3   7 -11   16.14    3.96
   3   7  11   10.81    3.06
  -3  -7 -11   10.34    2.86
  -3   7  11    9.55    2.53
   3   7  12   51.70    2.66
  -3   7  12   55.08    6.24
   3   7  12   51.00    3.00
  -7   3 -12   49.52    6.19
   3   7  12   53.95    6.01
   3   7 -12   48.96    6.08
  -3   7 -12   49.80    6.23
   7   3 -12   54.11    6.98
  -3   7  12   49.53    5.02
  -3  -7 -12   54.94    5.98
   7   3  12   55.26    5.83
  -3   7  12   49.97    2.55
   3  -7  12   50.29    3.01
   3   7  12   54.71    5.54
   3   7 -13    1.67    1.01
   3  -7  13    0.27    1.25
   7   3  13    1.02    0.81
  -3   7  13    0.72    0.78
   3   7  13    0.86    0.76
  -3   7  13    2.32    2.07
  -3  -7  13    0.46    1.13
  -7   3 -13    1.71    1.74
   3   7  13   -0.14    1.37
  -3   7 -13    0.21    2.18
   3   7 -13    2.34    2.00
   7   3 -13    1.80    2.12
   7   3  13    0.67    1.45
  -3   7  13   -0.10    1.42
  -7   3  13   -2.44    2.47
  -3  -7 -13    2.22    1.77
   3   7  13    0.66    0.80
   3   7  13   -0.66    1.73
  -3   7  13   -0.41    0.94
  -3  -7 -14  218.72   12.88
   3  -7  14  222.45    6.90
  -3  -7  14  211.92    6.88
   7   3  14  232.58   12.72
  -3  -7  14  206.60    6.36
   7   3  14  206.60    5.67
   3   7 -14  203.95    5.72
   3   7  14  211.05    6.72
   7  -3  14  217.84   12.08
  -7   3 -14  211.56   13.20
  -3   7  14  211.64    5.94
   3   7 -14  227.78   14.12
   7   3 -14  235.40   15.41
  -7   3  14  205.80    6.34
  -3   7  14  228.75    7.26
   3   7  14  213.67    5.92
  -3   7  14  209.50   10.87
   3   7  14  223.05   13.15
   3   7  14  230.63   12.18
  -3   7 -14  227.56   13.76
  -3  -7  15   43.38    3.04
   7  -3  15   38.47    5.43
   7   3  15   46.27    5.92
   3   7  15   44.23    5.48
   7   3 -15   41.29    2.56
   7   3  15   40.44    2.52
  -3  -7  15   43.26    3.16
   3  -7  15   41.50    3.00
  -7   3 -15   46.04    6.42
  -3   7 -15   44.04    6.55
   3   7 -15   48.31    6.97
   3  -7  15   44.25    3.10
   7   3 -15   47.04    7.33
  -3   7  15   44.23    3.32
   7  -3 -15   39.40    6.79
  -3   7  15   37.31    4.88
  -3   7  15   42.97    2.68
   3   7 -15   43.35    2.64
  -3  -7 -15   41.01    5.99
  -7   3  15   40.76    3.65
   3   7  15   43.29    2.72
   3   7  15   40.92    2.99
   3   7  15   39.64    5.90
   3  -7  16  221.04    6.89
   7   3 -16  224.13   15.68
   3   7 -16  200.75    5.75
   7   3 -16  211.54    5.73
  -3  -7  16  202.88    6.85
  -7   3 -16  207.03   13.70
   7  -3  16  205.95    5.81
   7   3  16  203.00    5.65
  -3   7 -16  216.39   14.40
  -3   7  16  197.04   11.13
  -3  -7  16  202.83    6.48
  -3   7  16  217.70    7.53
   3   7 -16  215.69   14.50
   7   3  16  216.12   12.57
   7  -3 -16  209.93   15.51
   3   7  16  216.70    6.17
  -3   7  16  216.82    6.07
  -3  -7 -16  226.70   13.96
   3   7  16  224.91   12.61
   3   7  16  216.20    6.98
   7   3  16  204.26    6.02
  -7   3  16  206.33    6.19
   7  -3  16  192.62   11.68
  -7   3 -17   16.09    3.96
   3   7  17   13.52    3.28
  -3   7  17   14.37    3.14
   7  -3 -17   15.30    4.30
   7  -3  17   16.49    1.66
   7   3  17   15.82    1.61
   3   7 -17   15.23    1.69
   7   3  17   15.39    1.75
  -7   3  17   16.46    2.00
   3   7  17   14.49    1.73
   7  -3  17   12.73    3.32
   7   3 -17   15.90    1.64
  -3  -7  17   19.17    2.32
   3  -7  17   15.42    1.93
  -3   7 -17   12.89    3.89
   3   7 -17   17.06    4.54
  -3   7  17   15.57    2.17
   3   7  17   14.15    2.03
  -7  -3  17   14.99    1.71
  -3   7  17   15.15    1.81
   7   3 -17   14.57    4.63
  -3  -7 -17   16.09    4.07
  -3  -7  17   15.50    1.98
   7   3  17   15.80    3.65
   7   3  18  191.00    5.34
  -3  -7  18  195.69    6.61
   3   7  18  189.97    5.83
  -3   7  18  209.51    7.43
  -3   7  18  194.26    5.96
  -7   3  18  198.53    6.44
  -3  -7  18  184.73    5.91
  -7  -3  18  185.97    5.85
   3   7  18  197.23    6.91
   7  -3  18  189.49    5.67
   7   3  18  191.75    6.15
   3  -7  18  202.17    6.65
   7   3  19    8.63    1.27
  -3   7  19    8.81    1.51
  -3  -7  19    9.84    1.64
  -7   3  19    9.18    1.52
   3   7  19    9.35    1.34
   7  -3  19    9.15    1.30
  -7  -3  19    8.93    1.35
   3  -7  19    9.51    1.65
   3   7  19    9.80    1.77
  -3   7  19    9.91    1.80
   7   3  19    8.77    1.40
   3   7  20  117.19    5.26
   3  -7  20  124.43    4.96
  -7   3  20  112.50    4.74
  -7  -3  20  112.74    4.36
   7   3  20  113.05    4.50
  -3   7  20  119.70    5.58
   3   7  20  115.35    4.29
   7  -3  20  110.86    4.28
  -3   7  20  115.74    4.42
  -3  -7  20  118.73    4.97
  -7   3  21    2.22    0.88
  -7  -3  21    3.96    0.99
  -3  -7  21    4.14    1.27
   7   3  21    3.70    0.99
  -3   7  21    2.54    1.26
   3   7  21    3.61    1.01
   3  -7  21    4.30    1.27
  -3   7  21    3.33    1.81
   7  -3  21    2.91    0.81
   3   7  21    3.81    1.16
   3  -7  22   67.55    3.38
  -7  -3  22   61.66    2.99
  -3   7  22   60.34    3.44
   3   7  22   61.80    2.81
   7   3  22   60.94    3.04
  -7   3  22   60.26    3.13
   7  -3  22   59.82    2.88
  -3  -7  22   65.85    3.42
   3   7  22   66.76    3.75
   7  -3  23    0.69    0.61
   3   7  23    0.71    0.71
   3  -7  23    0.00    0.76
  -3  -7  23    0.38    0.75
   7   3  23   -0.63    0.75
  -7   3  23    0.55    0.63
  -7  -3  23    0.41    0.68
   7  -3  24   52.65    2.33
   3  -7  24   59.87    2.82
   3   7  24   51.27    2.10
  -3  -7  24   58.88    2.83
  -3  -7  25    0.27    0.56
   3  -7  25   -0.16    0.58
  -3  -7  26   28.08    1.52
   3  -7  26   29.23    1.58
  -7  -4   0   91.98    6.61
  -4   7   0  103.68    5.87
  -4  -7   0   97.65    7.53
   4   7   0   92.15    3.78
   7   4   0   89.94    4.89
   4   7   0   99.64    6.58
   7   4  -1    7.35    1.74
   4   7   1    7.79    2.18
   4   7  -1    8.05    2.33
  -4   7  -1    8.92    1.93
   7   4   1    7.56    1.62
  -4  -7   1   11.34    3.40
  -7  -4  -1    6.77    2.49
   4   7  -1    7.33    1.21
  -4   7   1    7.60    2.00
  -4   7  -1    8.90    2.28
   4   7   1    7.32    1.32
  -4  -7  -1    5.50    2.63
  -7  -4   1    8.46    2.72
   4   7   2   89.53    4.45
   4   7  -2   87.77    4.45
   4   7   2   93.62    6.23
  -4   7   2   91.61    5.61
   7   4   2   86.77    4.53
  -4   7  -2   94.65    5.47
  -7  -4   2   92.74    7.00
  -4  -7  -2   94.55    7.11
  -7  -4  -2   88.74    6.86
  -4  -7   2   93.75    7.44
  -7   4  -3   37.91    4.85
   7   4   3   33.65    2.81
   4   7   3   35.25    3.92
  -7  -4  -3   37.00    4.44
  -4   7  -3   38.21    3.47
  -4   7  -3   38.54    4.43
   4   7   3   35.63    2.93
  -4   7   3   35.94    3.63
  -4  -7   3   38.09    5.01
  -7  -4   3   35.94    4.45
   4   7  -3   35.13    3.24
  -7  -4   4   17.59    3.21
   4   7   4   17.27    2.92
   4   7   4   18.44    2.41
  -4   7  -4   18.28    3.10
  -4  -7   4   18.98    3.66
   7   4   4   16.98    2.14
   4   7  -4   16.75    2.47
  -4   7   4   19.51    3.05
  -7   4  -4   14.88    2.93
  -4   7  -4   18.80    2.64
  -4  -7  -4   16.57    3.07
  -7  -4  -4   15.44    3.04
   7   4   5   51.36    3.62
  -7   4  -5   59.09    6.11
  -4   7  -5   59.32    5.53
   4   7   5   52.22    4.78
  -4  -7   5   59.34    6.31
  -4   7  -5   54.00    4.40
   4   7  -5   61.99    5.08
   4   7   5   55.65    4.19
  -4   7   5   55.12    4.75
  -7  -4   5   53.09    5.32
  -7  -4  -5   52.68    5.24
   4   7  -6    4.05    1.87
   4   7   6    5.14    1.67
  -7   4  -6    3.42    2.05
  -4   7   6    5.73    2.01
   4   7   6    6.24    2.01
   7   4   6    4.73    1.65
  -4  -7  -6    4.58    2.33
  -4  -7   6    4.13    2.52
  -4   7  -6    4.59    1.89
  -7  -4  -6    4.49    1.87
  -7  -4   6    4.53    2.27
   7   4   6    3.52    1.08
  -4   7  -7  232.05   11.17
  -7   4  -7  227.03   11.67
   7   4   7  239.05    8.55
   4   7   7  245.71    9.80
  -4   7   7  251.26   10.97
   4   7  -7  234.99   10.69
   7   4   7  261.95   10.59
  -4  -7   7  248.63   12.81
  -7  -4   7  235.07   11.56
  -7  -4  -7  243.90   11.47
  -4  -7  -7  243.62   11.51
   4   7   7  240.81   10.66
   4   7   8   11.76    2.32
  -7  -4   8   10.75    2.71
   7   4   8   11.43    2.01
  -4  -7   8   14.70    3.74
  -7   4  -8   11.47    3.07
  -4  -7  -8   13.26    3.20
  -4   7  -8   12.32    3.03
  -4   7   8   11.58    2.85
   4   7  -8   11.41    2.99
   4   7   8   14.42    2.86
  -7  -4  -8   13.35    3.18
   7   4   8   13.17    2.69
   4   7   9  267.97   11.90
  -4   7   9  251.96   10.52
  -7  -4   9  273.31   12.92
  -4   7  -9  272.21   12.89
  -4   7   9  285.82   12.80
   4   7  -9  261.69   12.77
   4   7   9  281.53   11.45
  -7   4  -9  279.35   13.63
  -4  -7   9  285.21   14.41
  -4  -7  -9  297.76   13.39
   7   4   9  262.33    9.97
   7   4   9  290.95   12.03
   4   7  10   20.52    3.56
   7   4  10   21.29    3.50
  -4   7 -10   20.25    3.86
  -7   4 -10   24.45    4.58
  -4   7  10   18.45    3.05
   4   7 -10   19.83    3.75
   7   4 -10   22.09    4.18
  -7  -4  10   22.65    3.97
  -4  -7 -10   23.21    3.99
  -4  -7  10   22.11    4.23
  -4   7  10   22.58    3.85
   4   7  10   23.76    3.51
   4   7  11  209.55   11.29
  -4   7 -11  194.75   11.97
   7   4  11  217.23   11.30
  -7   4 -11  196.48   12.01
   4   7 -11  226.20   12.80
  -4   7  11  198.34    9.77
  -4   7  11  213.19   11.91
  -4  -7 -11  201.09   11.54
   7   4 -11  216.62   13.36
   4   7  11  218.12   10.82
   7   4  12   -0.32    0.75
  -4  -7 -12   -1.88    2.04
  -7   4 -12    1.30    2.25
   4  -7  12   -0.51    1.25
   4   7 -12   -0.32    0.86
   7   4  12   -0.14    1.44
   7   4 -12   -0.75    2.14
   4   7  12    0.09    1.49
   4   7  12    0.52    0.67
   4   7  12    0.41    0.71
  -4   7 -12    1.03    1.80
   4   7 -12    1.17    1.91
   4   7  12    2.04    2.17
  -7   4  12   -1.22    2.02
  -4   7  12    1.13    1.80
  -4   7  12    0.66    0.89
  -4  -7  12    0.28    1.09
  -4   7  12    0.73    0.74
  -4   7  12   -0.03    1.07
   4   7  13  190.64    5.48
   7   4  13  201.18   11.67
   4   7  13  184.37    6.02
  -4   7  13  191.28    5.47
   4   7  13  205.83   11.20
   7   4  13  185.31    5.39
  -4   7 -13  189.57   12.45
  -7   4 -13  179.05   12.28
   4   7 -13  177.24    5.29
   4   7 -13  190.41   12.55
   7   4 -13  209.25   13.91
   4   7  13  194.98   11.79
  -4   7  13  186.15   12.23
  -4  -7 -13  204.71   12.31
  -4   7  13  194.68    6.62
  -7   4  13  187.08    6.00
  -4  -7  13  189.15    5.95
   4  -7  13  194.18    6.04
  -4   7  13  178.33    9.86
   4   7  14   15.07    1.79
   4  -7  14   15.77    1.96
   4   7  14   13.57    3.19
  -4   7  14   17.93    1.80
   7   4  14   19.24    3.79
   4   7  14   13.32    3.31
  -4   7  14   15.34    3.07
   7   4  14   16.48    1.68
  -4  -7  14   16.03    1.95
  -4   7 -14   18.55    4.40
   4   7 -14   19.81    4.49
  -4   7  14   17.21    2.11
   7   4 -14   15.46    4.33
  -4  -7  14   17.63    2.10
   4  -7  14   16.90    1.97
  -4  -7 -14   16.46    3.76
   7   4 -14   16.45    1.69
  -7   4 -14   19.01    4.27
   4   7  14   16.15    1.69
  -7   4  14   19.58    3.11
  -4  -7  15   79.32    4.16
   7  -4  15   69.20    7.07
   7   4 -15   79.44    9.15
   7   4 -15   76.48    3.45
   4   7 -15   70.69    3.44
   4   7  15   79.61    4.08
   4   7  15   79.46    3.60
  -7   4  15   76.27    4.80
   4  -7  15   79.86    4.10
  -4  -7  15   79.16    3.98
  -4   7 -15   78.08    8.41
  -4   7  15   86.35    4.55
   7  -4  15   73.78    3.39
  -7   4 -15   72.93    8.16
   4   7 -15   80.52    8.65
   7   4  15   78.24    3.50
  -4   7  15   72.28    6.64
   4   7  15   81.63    7.65
   4   7  15   76.96    8.08
  -4  -7 -15   81.82    8.35
   7   4  15   83.11    7.67
  -4   7  15   83.68    3.70
  -7   4  16    7.36    1.39
   7   4  16    7.33    1.31
   7   4 -16    5.87    1.20
  -7   4 -16    4.01    2.41
   7  -4  16    5.45    2.11
   7  -4  16    6.76    1.16
   7   4  16    5.13    2.20
   4   7  16    6.24    1.46
  -4   7 -16    7.43    3.08
  -4   7  16    7.26    1.68
   7   4  16    6.09    1.23
  -4  -7  16    8.11    1.63
  -4  -7  16    7.19    1.49
   4  -7  16    5.89    1.22
   4   7 -16    4.71    2.55
   7   4 -16    7.21    3.32
   4   7  16    7.47    1.37
   7  -4 -16    3.76    2.42
   4   7 -16    6.20    1.28
   4   7  16    7.63    2.58
  -4  -7 -16    4.22    2.43
  -4   7  16    9.16    1.55
   7  -4  17   98.42    3.99
  -7   4  17  101.85    4.60
   7   4 -17   97.77    3.94
   4   7  17   98.73    4.19
   4   7 -17   92.99    9.92
  -4   7  17  105.65    5.20
  -7  -4  17   97.32    4.10
   7   4  17   99.36    8.85
  -4  -7  17  105.29    4.74
   4  -7  17  104.21    4.62
  -4  -7  17   99.06    4.43
   7   4  17  102.76    4.32
   7  -4 -17   84.03    9.93
  -4   7 -17   96.41    9.78
   4   7  17   96.38    4.73
   7   4 -17  100.37   11.04
  -7   4  17   81.05    4.35
   4   7 -17   99.92    4.06
  -4  -7 -17   93.80    9.43
   4   7  17   96.96    8.41
  -4   7  17  103.53    4.26
  -7   4 -17   94.43    9.62
   7   4  17  101.69    3.98
   4   7  18   11.32    1.67
   4   7 -18    9.51    1.38
   7   4 -18    9.71    1.33
  -4   7  18   10.22    1.75
  -4   7  18   11.71    2.02
   7   4  18    9.11    1.39
  -7   4  18    8.69    1.51
  -4  -7  18    8.28    1.50
   4  -7  18   10.30    1.60
   4   7  18   11.29    1.89
  -7  -4  18   11.34    1.51
   7  -4  18   10.07    1.37
   7   4  18   10.18    1.40
  -4  -7  18   11.77    1.80
   7  -4  19    1.67    0.83
   7   4  19    1.59    0.89
  -4  -7  19    2.12    1.21
   7   4  19    2.70    0.94
  -7  -4  19    1.89    0.84
  -4   7  19    2.22    1.75
   4   7  19    1.53    1.10
   4  -7  19    2.58    1.02
  -7   4  19    3.24    1.14
   4   7  19    3.04    1.16
  -4   7  19    2.09    1.37
   7   4  20   -0.04    0.70
   4  -7  20   -0.55    0.94
   7   4  20    0.22    0.70
   7  -4  20   -0.99    0.78
  -4   7  20   -1.30    2.19
   4   7  20   -0.22    0.88
  -4   7  20   -0.96    1.24
  -4  -7  20   -0.68    0.96
   4   7  20    1.09    0.91
  -7   4  20   -1.95    1.10
  -7  -4  20   -0.44    0.76
  -4   7  21    4.55    2.64
   4   7  21    3.23    0.92
   4  -7  21    3.32    1.07
   7  -4  21    2.57    0.81
   7   4  21    3.65    1.01
  -4  -7  21    3.75    1.15
  -7  -4  21    2.55    0.83
  -7   4  21    2.23    0.95
   4   7  21    1.67    1.01
   7   4  21    2.72    0.74
  -7  -4  22   -0.35    0.66
   7   4  22    0.53    0.68
   4   7  22    0.36    0.82
   7  -4  22    0.77    0.65
  -4  -7  22   -0.09    0.78
  -7   4  22    0.71    0.72
   4  -7  22   -0.09    0.88
   4   7  23    4.97    0.88
  -7  -4  23    4.26    0.76
   7  -4  23    5.05    0.91
  -4  -7  23    5.61    1.12
   4  -7  23    6.16    1.10
   4   7  24    1.38    0.62
   7  -4  24    2.01    0.65
   4  -7  24    1.69    0.72
  -4  -7  24    2.27    0.78
   4  -7  25   12.15    1.14
  -4  -7  25   11.20    1.12
   7   5   0 1345.16   22.80
   7   5   0 1385.74   20.15
   5   7   0 1393.35   26.10
  -5  -7   0 1376.27   30.03
  -7  -5   0 1367.56   28.55
   5   7   0 1328.67   17.99
   7   5  -1   35.98    2.53
   5   7  -1   41.39    4.35
  -5   7   1   42.87    3.74
   5   7   1   40.43    2.86
   7   5   1   39.54    3.49
  -7  -5  -1   39.33    4.62
  -7   5   1   41.06    2.75
  -5  -7  -1   39.51    4.91
  -5   7  -1   41.43    3.53
   7   5  -1   40.24    3.63
   7   5   1   43.14    3.24
   5   7   1   40.39    4.25
  -7  -5   1   42.06    4.94
  -5  -7   1   39.05    5.01
   5   7   2  599.67   12.46
   7   5   2  580.09   13.25
  -5   7   2  604.02   14.53
   5   7  -2  591.70   16.59
   5   7   2  581.90   15.82
  -7   5   2  586.14   12.07
  -5   7  -2  599.78   17.19
  -7  -5   2  602.13   18.50
   5   7  -2  544.59   12.16
  -5  -7   2  614.40   19.52
  -5  -7  -2  583.85   18.43
  -7  -5  -2  597.24   17.94
  -5   7  -2  603.67   13.74
   7   5   2  562.54   13.36
  -7  -5  -3   37.67    5.00
  -5   7   3   32.63    3.46
  -5  -7   3   39.02    5.20
   5   7   3   32.07    3.63
   5   7   3   33.27    2.98
  -5   7  -3   36.38    4.48
   5   7  -3   40.22    3.56
  -7   5   3   34.13    3.02
   7   5   3   35.14    3.14
  -7  -5   3   38.11    5.20
  -5   7  -3   34.37    3.23
  -5  -7  -3   36.48    5.07
   7   5   3   36.81    3.41
   7   5   4  456.00   12.66
   7   5   4  411.81   11.56
  -5   7  -4  438.84   15.10
  -7  -5  -4  469.76   15.89
  -5   7   4  455.87   13.29
  -7   5   4  448.52   11.98
   5   7  -4  418.01   12.35
   5   7   4  456.26   12.02
  -5   7  -4  431.77   11.62
  -5  -7   4  442.20   16.87
  -7  -5   4  437.87   16.27
  -5  -7  -4  432.11   15.69
  -7   5  -4  429.01   15.87
   5   7   4  435.85   13.76
   7   5   5    0.95    1.03
   5   7   5    2.11    1.36
  -5   7   5    2.30    1.49
  -5   7  -5    1.94    1.62
  -7  -5  -5   -0.56    1.87
  -7  -5   5    1.26    1.85
  -5  -7  -5    1.38    1.97
  -7   5  -5    1.92    1.77
   7   5   5    1.28    1.27
   5   7  -5    2.57    1.46
  -7   5   5    1.32    0.88
  -5  -7   5    3.08    2.21
   5   7   5    1.64    1.08
  -5   7  -5    0.83    0.84
   7   5   6   84.89    5.25
  -5  -7   6   89.28    7.95
  -5   7   6   92.23    6.44
   5   7  -6   86.39    6.17
  -7   5  -6   83.48    7.32
  -5   7  -6   90.54    7.10
  -5   7  -6   84.64    5.31
   5   7   6   83.15    6.10
  -7  -5   6   88.10    7.38
  -5  -7  -6   89.73    7.24
  -7  -5  -6   97.17    7.33
   7   5   6   91.78    5.96
   5   7   6   93.59    5.81
  -5   7   7    7.78    2.28
   7   5   7    8.31    1.88
  -5  -7  -7    6.04    2.39
   7   5   7    7.08    2.03
  -5  -7   7    9.15    3.32
  -7  -5   7    9.39    2.99
   5   7   7    9.12    2.04
  -7   5  -7    7.42    2.73
  -5   7  -7    7.53    2.49
   5   7  -7    7.61    2.29
  -7  -5  -7   12.81    3.49
  -5   7  -7    6.29    1.62
   5   7   7    8.28    2.31
  -7  -5   8   21.15    3.88
  -5  -7   8   21.34    4.28
   5   7   8   20.92    3.24
  -5  -7  -8   24.02    3.85
   7   5   8   21.02    2.92
  -5   7  -8   19.73    3.70
  -5   7   8   23.69    3.67
   7   5  -8   20.21    3.79
   7   5   8   22.85    3.42
   5   7  -8   20.19    3.48
   5   7   8   23.17    3.30
  -7   5  -8   21.82    4.04
  -7  -5  -8   21.63    3.72
  -5   7  -9   27.24    4.57
   5   7   9   29.37    3.83
   5   7   9   27.62    3.95
  -5   7   9   29.74    4.27
   7   5  -9   24.00    4.37
  -7   5  -9   24.60    4.48
   7   5   9   26.79    3.44
   5   7  -9   27.40    4.27
  -5  -7   9   28.62    4.90
  -7  -5  -9   26.21    4.33
  -7  -5   9   26.13    4.53
  -5  -7  -9   29.01    4.75
   7   5   9   30.01    4.06
  -7  -5  10    8.12    2.81
   7   5  10    8.81    2.34
  -5  -7  10    8.85    3.11
   5   7  10    9.22    2.46
  -5  -7 -10    8.50    2.69
  -7  -5 -10    9.33    3.34
   5   7  10    8.28    2.39
  -7   5 -10    7.21    2.71
   5   7 -10    9.52    3.18
   7   5 -10   11.00    3.38
  -5   7  10    7.78    2.45
  -5   7 -10    8.08    2.85
   5   7  11    5.43    2.15
  -5   7  11    8.77    1.31
  -5   7  11    7.86    2.94
   5   7 -11    5.60    1.16
  -5  -7 -11    6.41    2.41
  -7  -5 -11    5.92    2.63
   7   5  11   10.22    3.02
   7   5  11    7.76    1.32
   5  -7  11    6.41    1.44
  -7   5 -11    6.48    2.40
  -5   7 -11    6.86    3.06
   5   7 -11    8.40    2.78
   7   5 -11    7.20    3.20
   5   7  11    7.04    2.46
  -5  -7  11    8.74    2.88
   5   7  11    7.09    1.16
  -5   7  11    4.56    1.54
  -7   5  11    3.91    1.82
   5   7  12   47.32    5.53
   7   5  12   50.93    5.71
   5   7  12   46.84    2.68
   7   5  12   45.94    2.65
  -5  -7  12   49.65    3.19
  -7   5  12   49.39    3.34
   5   7  12   44.51    2.88
  -5  -7 -12   46.70    6.15
  -7   5 -12   50.51    6.59
   5   7 -12   50.56    6.56
   7   5 -12   43.89    6.26
  -5   7  12   47.12    5.97
  -7  -5 -12   48.82    6.16
  -5   7 -12   44.32    6.25
   7   5 -12   46.27    2.61
  -5   7  12   45.49    3.10
   5   7  12   51.49    5.53
  -5   7  12   47.13    2.64
   5   7 -12   48.31    2.72
   5   7 -13    6.89    1.23
   5   7 -13   10.49    3.38
   5  -7  13    9.02    1.46
   5   7  13    8.01    1.25
  -5  -7  13    8.98    1.57
  -5  -7 -13    6.79    2.93
   7   5 -13    7.66    1.25
   5   7  13    7.22    2.46
   5   7  13    9.07    2.73
  -7  -5 -13    8.00    3.17
   7   5  13    8.06    1.35
  -5   7  13    8.01    1.52
  -7   5 -13    7.80    3.14
  -5   7 -13    9.13    3.34
  -5   7  13    7.74    1.35
   5   7  13    7.32    1.34
   7   5 -13    3.78    2.24
  -5  -7  13    8.34    1.71
  -7   5  13   10.40    2.49
   7   5  13    8.51    2.56
   5   7 -14   87.46    3.80
   5   7  14   89.39    3.77
   7   5  14   87.83    3.75
  -5   7  14   87.77    4.57
   7   5  14  102.17    8.37
  -5  -7  14   87.90    4.26
  -5   7  14   87.80    3.88
  -5  -7  14   90.71    4.18
  -7   5 -14   89.28    8.99
  -5   7 -14   91.49    9.01
   5   7 -14   88.74    9.04
   7   5 -14   92.64    9.66
   5   7  14   94.54    8.04
  -7  -5 -14   97.50    9.19
  -5  -7 -14   94.21    8.87
   5  -7  14   93.46    4.23
   7   5 -14   89.42    3.73
   5   7  14   80.26    7.84
  -7   5  14   99.49    4.65
   5   7  14   80.43    3.99
  -5  -7  15    8.31    1.64
   7   5  15    7.17    1.33
   5   7  15    7.69    1.38
  -5   7  15    7.42    1.67
   7  -5  15    5.32    2.09
  -5   7 -15    6.47    2.69
   5   7 -15    7.56    1.35
   7   5 -15    7.18    1.25
   7   5  15    8.12    1.34
   7   5  15   10.78    3.24
   7  -5  15    7.43    1.16
  -5  -7  15    8.66    1.47
   5  -7  15    8.74    1.43
   5   7  15    9.31    2.74
  -7   5 -15    9.52    3.25
   5   7  15    8.35    1.57
   5   7 -15    6.99    3.11
   7   5 -15    6.94    3.25
   7  -5 -15    6.61    3.23
  -7  -5 -15   10.03    3.28
  -5   7  15    7.04    1.46
  -5  -7 -15    8.60    3.06
  -7   5  15   -1.28    3.41
   5   7  16   30.98    2.61
  -7   5  16   33.15    2.68
   5  -7  16   35.47    2.64
   7   5  16   33.33    2.37
   7  -5  16   32.17    2.30
  -5   7  16   35.35    2.66
  -5  -7  16   33.36    2.64
  -5   7 -16   30.54    5.48
   7   5  16   31.37    2.41
   7  -5  16   22.74    4.02
   5   7  16   33.02    2.49
   7   5  16   38.80    5.38
   5   7 -16   32.86    2.42
   7  -5 -16   31.94    6.35
   7   5 -16   30.39    2.31
   7   5 -16   29.85    5.78
   5   7 -16   28.14    5.49
  -7   5 -16   31.52    5.64
  -5  -7 -16   38.57    6.08
  -7  -5 -16   35.38    5.83
  -7   5  16   26.13    3.65
  -5   7  16   34.57    2.96
   5   7  16   35.28    5.18
  -7  -5  16   28.38    2.21
  -5  -7  16   33.07    2.75
   7  -5  17    6.85    1.18
  -7  -5  17    8.38    1.31
  -5   7  17    7.36    1.72
  -5  -7  17    7.12    1.40
   7   5 -17    8.76    1.41
  -5  -7  17    6.25    1.47
   7   5  17    7.84    1.34
   5   7  17    7.67    1.47
   5  -7  17    8.00    1.44
   5   7 -17    7.90    1.45
  -7   5  17    9.63    3.62
  -7   5  17    7.91    1.59
   5   7  17    7.57    1.51
   7   5  17    7.97    1.35
  -5   7  17    6.88    1.93
  -7   5  18   80.82    4.12
   5   7  18   87.36    3.84
   7   5 -18   86.25    3.69
  -7  -5  18   82.35    3.77
  -5  -7  18   86.08    4.15
  -5   7  18   84.46    4.30
   7   5  18   83.52    3.94
   7  -5  18   85.40    3.70
   5   7  18   79.85    4.19
  -5   7  18   84.61    4.67
   7   5  18   85.81    3.73
   5  -7  18   84.31    4.01
   5   7 -18   86.66    3.69
  -7  -5  19    3.17    0.97
   7  -5  19    3.45    0.96
   5   7  19    2.08    1.07
   7   5 -19    1.75    0.83
   5   7 -19    2.69    0.80
  -7   5  19    3.57    1.12
  -5  -7  19    3.31    1.02
   7   5  19    3.90    1.01
   5  -7  19    4.96    1.16
  -5   7  19    2.91    1.21
   5   7  19    3.67    0.99
   7   5  19    3.96    1.02
  -5   7  19    5.08    2.71
   7  -5  20   84.03    3.57
   7   5  20   81.42    3.76
   5  -7  20   86.78    3.88
  -5   7  20   88.58    4.72
  -7  -5  20   85.24    3.66
   7   5  20   85.87    3.47
   5   7  20   88.82    3.67
  -7   5  20   81.15    3.95
  -5  -7  20   90.66    4.05
   7   5  21    0.90    0.73
   5  -7  21    1.00    0.69
   7  -5  21    0.06    0.59
  -5   7  21    3.66    3.12
   5   7  21    1.50    0.79
   7   5  21    1.01    0.80
  -5  -7  21    1.50    0.92
  -7  -5  21    0.86    0.61
   7  -5  22  139.76    4.21
  -5  -7  22  145.10    4.67
   5  -7  22  146.69    4.60
  -7  -5  22  138.19    4.23
   5   7  22  139.12    4.07
   7   5  22  132.44    3.64
   7  -5  23    0.68    0.53
   5  -7  23    0.33    0.61
  -5  -7  23   -0.90    0.80
   5   7  23    0.33    0.55
   7  -5  24   48.66    2.03
   5  -7  24   55.68    2.41
   5   7  24   51.16    1.83
  -5  -7  24   54.42    2.40
  -5  -7  25    0.11    0.40
   5  -7  25    0.06    0.43
  -6   7   0  141.08    6.29
  -7  -6   0  151.58    9.83
  -6  -7   0  144.77    9.78
   6   7   0  137.41    7.64
   7   6   0  150.01    7.37
   6   7   1   31.33    2.63
   7   6  -1   34.19    3.71
  -6  -7   1   36.58    5.27
  -7  -6   1   34.60    4.94
  -6   7  -1   32.83    3.09
  -6   7   1   30.91    3.11
   6   7  -1   34.60    4.07
   6   7   1   32.82    3.78
   7   6   1   30.64    3.46
  -7  -6  -1   30.07    4.50
   7   6   1   34.86    2.91
  -6  -7  -1   33.04    4.56
   7   6   2    6.79    1.43
  -6  -7   2    4.89    2.99
   6   7   2    7.27    2.00
   6   7   2    6.03    1.35
   7   6  -2    6.15    1.95
  -6  -7  -2    8.11    2.62
  -7  -6   2    2.33    2.03
  -6   7  -2    6.68    1.49
  -7  -6  -2    5.20    2.22
   7   6   2    5.21    1.67
  -6   7   2    7.43    1.76
   6   7  -2    5.16    1.79
  -7   6   2    5.91    1.37
  -6   7   3  361.50   11.29
   6   7  -3  332.39   10.53
  -7  -6  -3  338.81   14.22
   7   6   3  354.64   11.25
  -6   7  -3  355.71    9.79
  -6  -7   3  380.32   16.11
  -7   6   3  362.64   10.54
  -6  -7  -3  342.51   14.51
   6   7   3  374.64   10.57
  -6   7  -3  371.79   14.26
   6   7   3  354.61   12.12
  -7  -6   3  373.51   15.71
   7   6   3  357.06   10.61
  -6   7  -4    8.35    1.63
   7   6   4    9.00    2.09
  -6   7  -4    7.19    2.56
  -7   6  -4    8.45    2.54
   7   6   4    7.98    1.87
   6   7  -4    7.33    1.94
  -6  -7   4    7.82    2.90
  -6   7   4    9.59    2.10
  -7   6   4    7.86    1.69
   6   7   4    8.57    2.05
  -7  -6  -4    6.68    2.51
  -6  -7  -4    9.62    2.95
   6   7   4    7.09    1.59
  -7  -6   4   10.04    3.33
  -6   7  -5   49.43    5.46
   7   6   5   49.27    4.27
  -6   7   5   48.70    4.58
  -7   6   5   46.05    4.20
  -7   6  -5   53.22    5.99
   6   7  -5   44.17    4.43
  -6  -7   5   49.84    6.11
  -7  -6   5   50.36    5.91
  -6  -7  -5   49.78    5.78
  -7  -6  -5   52.29    5.94
   6   7   5   47.30    4.54
   7   6   5   48.33    4.23
   6   7   5   48.72    4.17
   7   6  -5   44.95    4.84
  -7  -6  -6   10.16    2.88
  -6  -7  -6   12.87    3.21
   6   7   6   12.70    2.22
  -6   7   6   12.82    2.52
  -6   7  -6   13.67    3.32
   6   7   6   14.62    2.69
   7   6   6   13.02    2.23
  -7  -6   6   13.34    3.02
  -7   6  -6   11.49    2.93
  -6  -7   6   11.15    3.26
   6   7  -6   10.35    2.47
  -7   6   6   14.02    2.56
   7   6   6   13.24    2.44
   7   6  -6   11.73    2.81
   6   7   7   84.02    6.29
   7   6   7   87.95    5.95
  -6  -7  -7   92.72    7.84
   6   7   7   89.15    6.26
  -7   6  -7   87.67    7.94
  -6   7  -7   87.07    7.52
  -6   7   7   94.32    6.73
   6   7  -7   81.08    6.57
  -7  -6   7   89.44    8.05
  -7   6   7   97.97    6.77
  -7  -6  -7   92.62    7.74
  -6  -7   7   83.43    7.98
   7   6   7   95.56    6.61
   7   6  -7   94.54    7.43
  -6  -7  -8   -0.47    2.28
  -6   7   8   -0.06    1.20
   7   6   8   -1.15    1.12
  -6   7  -8    1.47    2.04
  -7   6  -8   -0.25    1.94
   6   7   8   -0.53    1.19
  -7  -6   8    0.01    1.78
  -6  -7   8    1.19    2.03
   6   7  -8    0.39    1.35
   7   6  -8    0.79    1.67
  -7  -6  -8    0.31    1.85
   6   7   8    0.10    1.07
   7   6   8    0.74    1.16
   7   6  -9  483.94   18.65
   6   7   9  479.63   16.15
   6   7   9  495.37   16.07
  -7   6  -9  509.80   19.13
  -6   7  -9  505.63   19.30
   6   7  -9  469.06   17.64
  -7  -6   9  499.28   19.73
  -6  -7   9  505.32   20.30
  -6  -7  -9  503.16   19.07
  -7  -6  -9  494.78   19.14
  -6   7   9  511.26   17.76
   7   6   9  480.64   15.25
   7   6   9  519.14   16.65
  -6   7  10   -0.16    1.11
   7   6 -10    0.77    0.82
   7   6  10    0.92    1.41
  -7   6  10   -2.23    1.48
   6   7  10    0.61    0.83
  -6  -7 -10    2.75    2.29
   6   7  10    1.22    1.54
  -6   7  10    0.07    1.28
   7   6  10    0.44    1.02
  -7   6 -10   -1.30    1.89
  -6   7  10    0.03    1.47
  -7  -6 -10   -0.14    2.39
  -6   7 -10   -1.37    2.00
  -6  -7  10    0.88    2.19
   6   7 -10    0.24    1.71
  -7   6  10    1.26    1.78
  -7  -6  10    0.53    1.69
   6   7  10    1.23    1.35
   7   6 -10    0.81    1.88
   6   7 -10    1.11    0.87
  -6   7  11  211.33    5.77
   6   7 -11  203.35    5.60
   6   7  11  198.80    5.80
   7   6  11  221.06   11.55
  -6   7 -11  208.46   12.84
  -7  -6  11  202.16    6.59
  -7   6  11  212.22    6.20
   6   7  11  201.78   11.15
   6   7 -11  204.78   12.83
   7   6 -11  209.06   12.93
  -6  -7  11  194.47    6.46
  -7   6 -11  210.33   12.98
  -6  -7  11  207.80   13.34
  -6  -7 -11  211.11   12.83
  -7  -6 -11  206.06   12.66
   6   7  11  214.91   11.29
  -7  -6  11  204.40   12.80
   7   6  11  200.35    5.77
   7   6 -11  209.70    5.73
   6   7 -12    4.01    1.03
  -7   6  12    6.44    2.18
  -6   7 -12    5.72    2.84
   6   7  12    4.81    2.12
  -7  -6 -12    4.98    2.88
  -6  -7  12    4.58    1.48
   7   6  12    4.78    1.16
   7   6 -12    4.60    1.14
  -7   6 -12    2.63    1.81
  -6  -7  12    4.31    1.26
   6  -7  12    4.27    1.02
   6   7 -12    3.85    2.07
   6   7  12    3.03    1.70
   6   7  12    4.06    1.05
   7   6 -12    3.37    2.25
  -6  -7 -12    5.64    2.81
   6   7  12    4.32    1.08
   7   6  12    6.27    2.58
  -7  -6  12    2.55    1.50
  -6   7  12    3.99    1.24
   7   6 -13  278.80    6.96
   7   6  13  317.11   14.79
  -7  -6 -13  300.99   16.24
  -6  -7 -13  290.81   15.94
  -6   7 -13  285.05   15.70
   6   7  13  268.16    7.23
   6   7  13  298.86   14.14
   6  -7  13  276.49    7.31
  -7   6 -13  288.30   15.92
  -7   6  13  298.03    7.96
   6   7 -13  302.64   16.59
  -6  -7  13  290.84    7.77
   7   6 -13  279.21   16.28
   6   7  13  278.85    7.08
   6   7  13  250.42   13.24
  -6   7  13  299.31    7.16
   6   7 -13  279.85    6.98
  -7  -6  13  288.35    7.66
   7   6  13  283.30    7.15
  -6  -7  13  273.66    7.38
   7   6 -14    1.99    0.94
   6   7  14    0.69    1.49
  -6   7  14   -0.25    1.56
  -6  -7  14    0.14    1.21
   7   6  14    0.79    0.97
  -7  -6 -14    1.43    2.07
   7  -6  14    0.40    0.61
  -6  -7  14    2.00    0.90
   6  -7  14    0.95    0.72
   6   7  14    0.96    0.91
  -7   6 -14    0.00    2.01
  -6   7 -14    0.59    1.65
   7   6  14    0.82    1.34
   6   7 -14    3.45    2.68
   7   6 -14    2.27    2.55
   6   7  14    1.06    0.91
  -6   7  14    1.18    0.91
  -7  -6  14    1.76    1.30
  -6  -7 -14    0.47    2.13
   6   7 -14    1.32    0.99
  -7   6  14   -1.74    2.81
  -6   7  15  119.48    5.32
   6   7 -15  119.92    4.63
   7  -6  15  116.57    4.41
   7   6  15  119.41    4.62
   7   6 -15  121.65    4.54
  -6   7  15  132.53    5.08
   6   7  15  128.78    9.68
  -7   6  15  126.54    5.84
  -6   7 -15  110.12   10.40
   6  -7  15  120.68    4.76
  -7   6  15  123.68    5.17
  -6  -7  15  115.49    4.76
   7   6  15  117.50    4.64
   6   7 -15  123.88   11.20
   7   6 -15  119.60   11.26
   7  -6 -15  105.86   10.80
  -6  -7 -15  129.72   11.13
  -7  -6 -15  130.20   11.12
   6   7  15  114.84    4.80
  -7   6 -15  118.45   10.82
   7   6  15  123.68    9.56
   6   7  15  122.39    4.67
  -6  -7  15  116.14    4.81
  -7   6  16   15.06    1.89
  -6  -7  16   13.31    1.91
   7  -6  16   14.21    1.57
  -6  -7  16   14.81    1.75
   7   6 -16   15.09    1.70
   6  -7  16   14.88    1.69
   6   7  16   15.78    1.81
   6   7 -16   14.41    1.74
  -7   6  16   17.21    3.50
   6   7 -16   13.60    4.07
  -6   7  16   15.81    2.83
   7   6 -16   18.61    5.02
   7   6  16   19.30    4.00
   6   7  16   14.27    3.39
   7   6  16   15.51    1.78
   6   7  16   14.47    1.80
   7   6  16   15.66    1.75
  -7  -6  16   14.98    1.68
   7   6  17   75.14    3.57
  -7   6  17   77.30    5.20
  -7   6  17   71.07    3.93
  -6  -7  17   73.59    3.74
   7  -6  17   70.93    3.44
   6  -7  17   74.88    3.69
   6   7 -17   71.08    3.54
   7   6  17   70.99    3.69
  -7  -6  17   74.72    3.58
   6   7  17   73.11    3.72
  -6   7  17   81.21    4.75
   6   7  17   70.21    3.83
   7   6 -17   76.32    3.63
   6   7 -18    2.09    1.02
   7   6  18    2.15    0.94
  -7   6  18    2.64    3.87
  -7  -6  18    3.05    0.85
   7  -6  18    2.64    0.91
  -6  -7  18   -0.19    1.36
   7   6 -18    2.32    1.05
   6  -7  18    3.47    1.01
  -6   7  18    3.07    3.25
   7   6  18    3.55    1.04
   6   7  18    2.92    1.09
   6   7  19   14.30    1.64
   7   6 -19   14.84    1.63
   6   7 -19   15.10    1.62
  -6  -7  19   15.69    1.73
   6  -7  19   15.77    1.69
  -6   7  19   10.29    3.59
  -7  -6  19   14.02    1.52
   7  -6  19   14.31    1.53
   7   6  19   14.62    1.66
   7  -6  20    8.56    1.21
   7   6  20    8.57    1.22
   6   7  20    9.39    1.39
  -7  -6  20    8.10    1.24
  -6   7  20   10.67    3.56
   6  -7  20    9.28    1.30
  -6  -7  20    9.47    1.36
   6   7  21   -0.02    0.72
  -7  -6  21    1.25    0.71
  -6  -7  21    0.70    0.76
   6  -7  21    0.47    0.66
   7  -6  21   -0.06    0.57
   7   6  21    0.54    0.70
   7  -6  22   -0.31    0.57
  -7  -6  22   -0.09    0.53
   6   7  22   -0.48    0.72
   6  -7  22    0.36    0.62
  -6  -7  22    0.74    0.60
   7   6  22    0.46    0.63
   7  -6  23    7.12    0.89
  -6  -7  23    6.70    0.95
   6  -7  23    5.66    0.88
   6   7  23    7.10    0.91
  -6  -7  24    1.26    0.55
   6  -7  24    0.45    0.44
   7   7   0  680.44   17.56
  -7  -7   0  741.11   22.73
   7   7   1    1.10    1.28
  -7  -7  -1    0.88    2.22
   7   7  -1    0.00    1.14
  -7  -7   1    2.75    2.30
   7   7  -2  455.88   14.59
   7   7   2  458.30   11.43
  -7  -7   2  461.60   18.36
  -7  -7  -2  475.24   17.58
   7   7   2  459.44   13.99
  -7   7   2  458.81   12.26
  -7  -7   3    3.20    2.88
   7   7   3   -0.20    0.98
   7   7  -3   -0.10    1.11
   7   7   3    0.05    0.71
  -7  -7  -3    1.53    1.92
  -7   7   3   -0.42    0.81
  -7   7  -4   10.78    2.93
  -7   7   4   11.13    2.35
   7   7  -4   12.44    2.46
   7   7   4   10.10    2.35
  -7  -7   4   14.50    3.72
  -7  -7  -4    7.59    2.48
   7   7   4    9.35    1.89
  -7  -7  -5   -0.74    2.02
   7   7   5   -0.54    1.01
  -7   7  -5   -0.09    1.62
   7   7   5    1.11    0.96
  -7   7   5    0.46    1.25
   7   7  -5    1.42    1.43
  -7  -7   5   -0.28    2.24
   7   7   6   19.61    3.03
   7   7   6   20.73    3.09
  -7   7   6   22.00    3.36
  -7   7  -6   21.90    4.14
   7   7  -6   20.14    3.43
  -7  -7  -6   20.43    4.12
  -7  -7   6   18.80    4.09
   7   7   7    0.20    1.02
  -7  -7  -7    2.28    2.24
  -7   7  -7    1.10    2.33
  -7   7   7    0.64    1.39
   7   7  -7    1.96    1.54
  -7  -7   7    0.46    1.97
   7   7   7    0.23    1.03
  -7   7   8    3.18    1.68
   7   7   8    3.27    1.52
   7   7   8    3.85    1.62
  -7   7  -8    2.68    2.28
   7   7  -8    2.19    1.63
  -7  -7   8    3.79    2.52
  -7  -7  -8    2.62    1.80
  -7   7   9   -1.02    1.74
   7   7  -9   -0.40    0.74
  -7   7   9   -0.23    1.28
  -7   7  -9    0.65    1.80
   7   7   9   -0.54    1.27
  -7  -7  -9   -0.19    2.00
   7   7   9    0.63    0.74
   7   7  -9    0.94    1.82
   7   7   9    0.26    1.31
  -7  -7   9   -0.03    2.34
  -7  -7   9    0.23    1.46
  -7  -7  10   21.63    4.54
   7   7  10   22.65    3.62
  -7   7 -10   22.73    1.70
  -7   7  10   23.21    2.43
  -7  -7  10   21.42    2.52
   7   7  10   22.32    3.52
   7   7 -10   20.68    4.18
  -7   7 -10   20.45    4.53
  -7  -7 -10   26.86    5.39
   7   7 -10   20.79    1.87
   7   7  10   21.49    1.91
  -7  -7  11    0.53    1.42
   7   7  11    0.81    0.92
   7   7 -11    1.19    0.83
   7   7  11    0.97    1.24
  -7   7  11    0.39    1.91
  -7   7 -11    1.23    0.72
  -7   7 -11   -0.50    1.86
   7   7 -11    1.13    1.89
  -7  -7  11   -0.86    1.93
  -7  -7 -11    1.51    2.66
   7   7 -12   80.06    3.56
   7   7  12   76.44    3.55
  -7  -7  12   79.10    4.25
   7   7  12   83.84    7.33
  -7   7 -12   75.18    8.41
   7   7 -12   71.15    7.89
  -7  -7 -12   84.56    8.76
  -7   7  12   83.93    4.24
   7   7  13    1.18    0.98
  -7  -7 -13    1.72    2.37
  -7  -7  13    1.44    1.51
   7   7  13   -1.19    1.60
  -7   7  13    0.09    2.48
   7  -7  13    0.76    0.70
  -7   7 -13    1.05    1.83
   7   7 -13    0.96    2.61
   7   7 -13    1.50    1.09
   7   7 -14   47.13    2.97
   7   7  14   48.09    3.02
  -7   7 -14   40.95    6.44
   7   7 -14   49.67    7.16
  -7  -7  14   51.59    3.28
   7   7  14   50.72    6.02
  -7  -7 -14   49.72    7.13
   7  -7  14   47.51    2.81
  -7  -7  15   -0.36    1.16
   7   7  15   -1.03    1.56
  -7  -7 -15   -0.37    2.09
   7   7  15    1.34    1.10
   7   7 -15    0.95    2.15
   7   7 -15    1.15    1.07
  -7  -7  15   -0.35    0.84
   7  -7  15    0.49    0.72
  -7   7 -15   -1.15    2.55
  -7   7  15    1.72    3.22
  -7   7  16   89.22    5.32
  -7  -7  16   82.44    3.79
  -7  -7  16   77.16    3.91
   7   7 -16   82.85    3.92
   7  -7  16   83.44    3.73
   7   7  16   90.02    4.03
  -7   7  17    3.72    3.87
  -7  -7  17    0.40    0.69
   7  -7  17    0.15    0.70
   7   7 -17   -0.11    1.01
   7   7  17    0.98    1.01
   7  -7  18   59.85    3.08
   7   7 -18   62.47    3.27
   7   7  18   65.15    3.36
  -7  -7  18   58.09    3.08
   7   7  19    0.63    0.89
   7  -7  19    0.61    0.68
  -7  -7  19    0.78    0.63
   7   7 -19    0.87    0.85
   7   7 -20   88.40    3.38
   7   7  20   89.10    3.56
  -7  -7  20   82.02    3.40
   7  -7  20   85.99    3.41
   7  -7  21    0.22    0.51
  -7  -7  21   -0.13    0.57
   7   7  21   -0.73    0.67
   7  -7  22   47.76    2.23
   7   7  22   49.79    2.22
   7   7  23    0.65    0.52
   7  -7  23   -0.17    0.43
   0   8   0  968.83   15.57
  -8   0   0  999.64   18.75
   0   8   0 1007.17   22.05
  -8   0  -1    1.75    1.50
   0  -8  -1    2.93    2.35
   0   8  -1    2.05    1.31
   0  -8   1    2.98    2.27
  -8   0   1    1.17    1.38
   0   8   1    7.63    2.70
   0   8  -1    3.98    2.64
   0   8  -2  413.43   10.80
   0   8  -2  426.84   14.07
   0   8   2  411.58   10.46
   0  -8   2  409.52   14.26
   0  -8  -2  415.37   13.47
  -8   0   2  396.10   10.93
  -8   0  -2  426.41   12.01
   0   8   2  409.79   13.73
  -8   0  -3    3.29    1.73
   0  -8   3    2.36    1.89
   0   8   3    1.70    1.17
   0   8   3    1.59    2.12
   0   8  -3    2.11    1.48
  -8   0   3    1.92    1.32
   0   8  -3    0.98    1.80
   0   8  -4   65.40    4.76
   0   8   4   66.66    4.48
   0  -8   4   69.57    6.14
  -8   0   4   65.30    4.08
   0  -8  -4   65.94    5.27
   0   8   4   67.95    5.72
   0  -8  -5    2.97    2.33
   0   8   5    7.99    2.34
   0   8   5   10.70    3.20
   0   8  -5    4.36    2.25
   0  -8   5    7.06    3.11
   0   8   6  112.40    7.46
   0  -8   6  107.86    7.81
   0   8   6  105.49    6.03
   0  -8  -6  107.89    6.81
   0   8  -6   95.68    6.41
   0  -8   7    8.51    3.41
   0  -8  -7    4.73    2.31
   0   8  -7    6.47    3.00
   0   8   7    8.61    3.21
  -8   0  -7    5.78    2.81
   0   8   7    9.68    3.32
   0  -8   8  272.04   13.03
   0   8  -8  268.93   11.89
  -8   0  -8  272.61   12.17
   0  -8  -8  289.29   11.69
   0   8   8  287.44   11.01
   0   8   8  297.05   12.99
   0  -8  -9    0.88    1.62
   0   8  -9    2.56    2.36
   0   8   9    5.85    2.70
   0   8   9    6.54    2.46
  -8   0  -9    2.72    2.20
   0   8  10    0.77    1.20
   0   8  10    1.80    1.88
   0   8 -10   -0.94    1.86
  -8   0 -10    0.75    1.36
   0  -8 -10    1.64    1.31
   0  -8 -11    2.10    2.00
  -8   0 -11    1.63    1.80
   0   8 -11    0.90    1.98
   0   8  11    2.13    2.06
   0   8  11    1.36    2.00
   0   8  12    5.70    1.11
   0   8 -12    5.43    0.97
  -8   0 -12    4.51    2.16
   0   8  12    9.25    3.04
   0   8  12    5.17    1.27
   0   8 -12    7.65    2.57
   0  -8  12    6.97    1.65
   0   8  12    4.69    1.72
   0   8 -13    1.26    0.88
   8   0  13    1.68    1.51
  -8   0 -13   -0.15    1.42
   0   8  13   -0.80    1.68
   0  -8  13   -0.28    1.31
   0   8  13    1.26    1.67
   0   8 -13    0.57    2.04
   0   8  13    0.15    0.88
   0   8  13    0.12    0.90
   0   8  14   99.44    9.22
   0   8  14  103.33    4.92
   0   8  14  101.56    7.93
   0   8 -14  105.39    9.82
   0  -8  14  104.91    4.55
   0   8 -14   95.16    3.71
  -8   0 -14  108.06    8.88
   0   8  14  102.44    4.00
   8   0  14  107.06    8.80
   0   8  15   -0.89    1.92
   0   8  15    0.50    0.95
   0   8 -15   -0.72    0.82
   8   0  15   -1.43    1.84
   0  -8  15   -1.26    1.60
   0   8  15    2.70    2.51
   0  -8  15   -0.63    0.99
   0   8 -15    0.47    2.38
   8   0 -15    1.21    2.34
   0   8  15    0.44    0.97
   0   8  16  131.72    4.75
   0   8 -16  124.35    4.26
   8   0  16  126.95    9.85
   0   8 -16  133.52   11.31
   8   0 -16  133.40   12.72
   0  -8  16  136.80    5.75
   0   8  16  126.40    9.16
   0  -8  16  130.91    5.32
   0   8  16  133.93    5.91
   0   8  17    0.47    0.98
   0   8  17    0.09    1.44
   0   8 -17    1.79    2.30
   0  -8  17   -0.33    1.44
   8   0  17   -0.10    1.76
   0  -8  17   -0.08    1.00
   8   0 -17    1.74    2.74
   0   8  17   -1.16    1.17
   0  -8  18  151.65    5.57
   0   8  18  172.09    6.75
   0  -8  18  175.63    6.37
   0   8  18  164.03    5.35
   0  -8  19    0.66    1.13
   0   8  19    1.82    1.10
   0   8  19    0.54    1.14
   0  -8  20   93.96    4.50
   0   8  20   96.03    4.94
   0   8  20   87.98    3.77
   0   8  21   -0.43    1.02
   0  -8  21   -0.63    0.99
   0  -8  22  140.22    5.06
   0   8  22  133.73    4.23
   0   8  23   -0.74    1.19
   0  -8  23   -0.37    0.78
   0  -8  24   99.98    3.71
   0   8  24   91.46    3.14
   0  -8  25   -0.45    0.70
   0  -8  26   47.41    2.01
   1  -8   0    7.92    2.69
  -8   1   0    7.69    2.20
  -1  -8   0   10.30    3.38
   1   8   0   16.19    3.56
  -1   8   0   10.85    3.34
  -8  -1   0    5.45    2.21
  -8  -1   1    1.72    1.76
   1  -8  -1    4.25    2.12
  -8   1  -1    2.83    1.58
   1  -8   1    4.36    2.12
   1   8  -1    1.64    0.95
  -1   8  -1    2.18    1.30
   1   8  -1    3.92    2.05
  -8   1   1    0.67    0.86
  -1   8   1    3.47    2.32
  -8  -1  -1    1.42    1.49
   1   8   1    3.11    2.39
  -1  -8   1    2.14    2.45
  -1  -8  -1    1.88    1.71
   1   8   1    2.70    1.25
  -1   8  -1    3.30    2.28
   1   8  -2    6.14    2.84
   1  -8  -2    4.63    2.40
  -8   1   2    5.27    1.55
  -1  -8   2    5.10    3.29
  -8  -1   2    5.57    2.45
  -1   8  -2    8.47    3.23
   1   8   2    6.52    1.84
   1  -8   2    6.11    3.65
  -8   1  -2    6.64    2.16
  -8  -1  -2    9.32    2.78
  -1   8  -2   21.55    3.38
  -1  -8  -2    7.27    3.05
   1   8   2    7.62    3.26
   1   8  -2    6.56    1.97
  -1   8   2    6.71    2.69
   1   8   3  269.69   11.12
  -1   8  -3  256.63    9.32
   1   8  -3  256.12    8.62
  -1   8   3  275.02   10.93
  -1   8  -3  270.84   11.29
  -1   8   3  262.70    8.72
   1  -8   3  262.13   10.97
   1   8   3  264.10    8.52
  -8  -1   3  251.31    9.49
  -8  -1  -3  270.78   10.20
  -1  -8   3  256.80   11.75
   1  -8  -3  248.99    9.80
  -1  -8  -3  264.45   11.09
   1   8   4   33.07    4.24
  -1   8   4   34.73    4.43
   1   8   4   34.66    3.39
  -1  -8   4   36.39    4.78
  -1   8   4   38.38    3.65
  -1   8  -4   35.56    3.79
   1   8  -4   32.06    3.39
   1  -8   4   35.04    4.52
  -8  -1   4   32.42    3.48
   1  -8  -4   39.58    4.02
  -1  -8  -4   35.41    4.23
  -8  -1  -4   33.06    3.84
  -1   8   5  755.95   19.63
   1   8   5  738.13   16.24
  -1   8  -5  728.50   18.06
  -1  -8  -5  732.48   19.14
   1   8   5  751.17   19.79
   1  -8   5  719.62   19.93
   1   8  -5  743.43   17.23
  -1  -8   5  771.15   21.58
  -1   8   5  734.65   16.27
  -8  -1   5  703.71   16.25
   1  -8  -5  702.45   16.99
   1  -8  -6   81.05    5.52
   1   8  -6   79.03    5.79
   1  -8   6   84.68    6.87
  -1  -8   6   92.53    7.56
  -8  -1   6   81.97    5.32
   1   8   6   88.38    5.52
  -1  -8  -6   81.69    6.18
  -8   1  -6   77.94    6.52
  -1   8   6   82.00    5.36
  -1   8  -6   81.12    6.05
  -1   8   6   90.78    6.76
   1   8   6   87.89    6.70
   1   8   7 1043.85   24.61
  -1   8   7 1070.23   24.52
   1   8   7 1041.30   21.36
   1   8  -7 1040.12   23.20
  -8   1  -7 1014.21   24.43
  -1   8  -7 1037.34   23.75
  -8  -1   7  991.38   20.20
  -1   8   7 1055.84   21.27
  -1  -8   7 1066.76   26.85
   1  -8  -7 1028.49   21.46
  -1  -8  -7 1028.73   23.70
   1   8   8    0.14    1.54
  -1   8  -8    1.30    1.59
  -8   1  -8    0.46    1.52
   1   8   8    0.27    1.24
   1  -8  -8    0.48    1.11
  -1   8   8   -0.03    1.49
  -8  -1  -8   -0.22    1.37
  -1  -8  -8   -1.76    1.54
   1   8  -8    0.13    1.26
  -1  -8   8    0.22    1.83
  -1   8   8    0.21    1.18
  -1  -8   9  537.92   19.41
  -1   8   9  534.94   15.76
  -1   8   9  558.28   18.46
   1   8   9  549.33   18.17
  -8  -1  -9  526.62   16.78
  -8   1  -9  537.31   17.96
  -1   8  -9  517.81   17.65
   1   8  -9  523.81   17.91
   1  -8  -9  544.07   15.76
  -1  -8  -9  566.38   18.01
   1   8   9  550.70   16.14
  -1  -8 -10    0.93    1.38
  -8   1 -10    0.24    1.41
  -8  -1 -10    1.59    1.19
  -1   8 -10    0.99    1.85
   1   8 -10    1.79    1.94
   1   8  10    1.70    1.62
  -1   8  10    3.38    2.21
   1   8  10    1.42    1.21
  -1   8  10    0.72    1.18
   1   8  11  545.49   17.50
  -8  -1 -11  559.01   18.10
  -8   1 -11  521.63   18.99
  -1   8 -11  549.51   19.82
   1   8 -11  557.27   19.98
  -1   8  11  586.01   20.32
  -1   8  11  536.73   16.80
  -1  -8 -11  580.01   19.00
   1   8  11  559.81   19.98
  -1   8 -12    9.29    1.18
   1   8 -12    8.19    1.18
   1   8  12   10.86    1.39
   1   8  12    9.44    2.43
  -1   8  12    7.90    2.40
   1   8  12    9.38    1.54
   1   8  12   10.54    3.00
   8   1  12    9.08    2.70
  -8   1 -12    7.63    2.43
  -1   8  12    8.88    1.29
  -1   8 -12    9.08    2.94
   1   8 -12    7.61    2.65
  -1  -8 -12   10.38    2.84
   1  -8  12    9.89    1.62
  -1  -8  12   10.42    1.71
  -8  -1 -12   10.32    2.59
  -1   8  12   12.57    3.42
  -1   8  12    9.40    1.57
  -1   8 -13  188.82    5.22
   8   1  13  214.71   12.15
  -8  -1 -13  205.89   11.32
  -8   1 -13  195.72   12.24
  -1   8 -13  208.67   12.82
   1   8 -13  207.87   12.99
   1  -8  13  206.63    6.31
   1   8  13  203.73   12.60
  -1   8  13  207.00   12.84
   1   8  13  198.12    6.65
  -1   8  13  194.28   10.52
  -1   8  13  202.95    6.88
  -1  -8 -13  218.30   12.23
  -1  -8  13  204.70    6.37
   1   8  13  202.09    5.62
   1   8  13  203.21   11.00
   1   8 -13  185.41    5.32
  -1   8  13  203.82    5.57
   8   1  14    1.83    1.45
  -1   8  14    3.38    1.16
   1  -8  14    0.34    1.59
  -1   8  14    2.10    2.49
   1   8  14    1.65    0.99
  -1   8 -14    2.65    0.92
   8   1  14    2.99    0.96
  -1  -8  14    5.63    1.71
   1   8  14    4.76    2.71
   8  -1  14    3.43    1.89
  -8   1 -14    2.54    2.48
  -1   8  14    2.06    1.27
  -1   8 -14    3.07    2.58
   1   8 -14    3.65    2.44
   8   1 -14    1.72    2.10
   1   8  14    1.43    0.91
  -1   8  14    0.55    1.03
   1   8 -14    4.11    1.11
   1   8  14    0.23    1.27
   1  -8  15   71.68    3.87
  -8   1 -15   63.33    7.29
   1   8 -15   57.90    2.98
   1   8  15   69.20    6.70
  -1  -8  15   68.79    4.07
   8   1  15   60.36    2.92
   8  -1  15   61.63    6.75
  -1   8 -15   62.68    2.94
   1  -8  15   65.66    3.96
   1   8  15   67.26    4.03
  -1   8 -15   59.88    7.55
   1   8 -15   71.32    8.11
   8   1 -15   68.46    9.09
   8  -1 -15   67.58    9.39
   1   8  15   64.46    3.34
  -1   8  15   62.55    6.29
  -1   8  15   69.34    3.40
   1   8  15   68.12    7.88
  -1   8  15   65.30    7.79
  -1  -8  15   62.02    3.78
  -1   8  15   65.52    4.13
   8   1  15   68.06    7.11
  -1   8  16    6.01    1.32
   1   8  16    8.34    2.49
   1   8 -16    6.49    1.25
   1   8  16    6.84    1.74
   8   1  16    7.55    2.83
  -1   8  16    5.96    1.64
   8  -1  16    8.63    2.88
  -1   8  16    5.54    2.29
  -1  -8  16    7.39    1.62
  -8   1 -16    4.91    2.37
   1  -8  16    5.83    1.56
   1  -8  16    7.32    1.73
  -1   8 -16    5.90    2.96
   1   8 -16    5.72    2.82
   1   8  16    7.63    1.47
   8  -1 -16    7.27    3.32
   8   1 -16    7.72    4.16
  -1  -8  16    4.73    1.70
   1   8  17  115.85    5.41
  -1   8 -17  103.46   10.31
   1  -8  17  106.08    4.72
   8   1 -17  103.72   11.31
  -1  -8  17  112.67    5.19
   8   1  17  105.67    9.08
  -1   8  17  114.20    5.57
   1   8 -17  109.71   10.59
   8  -1 -17  110.08   11.34
  -1  -8  17  110.82    4.89
   1   8  17   97.86    8.36
  -1   8  17   96.75    8.01
   1   8  17  104.61    4.38
   1  -8  17  111.44    5.12
   8  -1  17   96.31    8.66
  -1   8  17  107.44    4.33
   1   8  18    5.14    1.25
   1  -8  18    4.47    1.68
   1   8  18    5.94    1.62
  -1  -8  18    5.12    1.40
   1  -8  18    5.71    1.41
  -1  -8  18    5.58    1.63
  -1   8  18    6.56    1.72
  -1   8  18    6.34    1.42
  -1   8  19   32.73    2.49
  -1  -8  19   31.66    2.74
  -1   8  19   31.20    3.07
   1   8  19   30.47    2.94
   1  -8  19   31.76    2.73
  -1  -8  19   29.71    2.54
   1   8  19   31.81    2.44
  -1   8  20   -0.83    1.13
   1  -8  20   -0.63    1.11
   1   8  20   -0.16    1.19
   1   8  20    0.41    1.00
  -1   8  20    0.28    1.32
  -1  -8  20   -0.66    1.09
  -1   8  21    0.88    0.97
   1  -8  21   -0.47    1.04
  -1  -8  21   -0.29    0.91
   1   8  21    1.01    0.93
   1   8  22    0.49    0.83
   1  -8  22    0.82    1.02
  -1  -8  22    0.99    0.87
  -1   8  22    0.88    1.24
  -1  -8  23   15.74    1.65
  -1   8  23   16.48    1.95
   1  -8  23   15.87    1.65
   1   8  23   13.53    1.44
   1  -8  24    0.71    0.72
  -1   8  24    1.89    1.89
  -1  -8  24    1.75    0.86
   1   8  24    1.79    1.16
   1  -8  25   19.17    1.47
  -1  -8  25   18.69    1.45
  -1  -8  26    7.98    0.87
   1  -8  26    8.72    0.93
  -2   8   0  498.73   14.55
   2  -8   0  484.13   13.56
  -2  -8   0  516.97   16.72
  -8   2   0  488.24   10.47
   2   8   0  501.28   15.32
  -8  -2   0  519.07   14.60
   2   8  -1   49.66    4.92
  -2  -8  -1   49.78    5.60
   2   8   1   45.53    4.69
  -2   8   1   49.23    4.51
  -2   8  -1   58.10    4.58
   8   2  -1   41.42    2.58
   2   8   1   44.47    3.01
   2  -8   1   43.73    4.13
  -2   8  -1   45.46    4.38
   2  -8  -1   44.77    3.96
  -2  -8   1   55.74    5.77
  -8  -2   1   50.72    4.78
  -8  -2  -1   57.21    5.04
  -8   2  -1   48.17    3.37
  -2  -8  -2 1054.21   23.90
  -8  -2   2 1089.27   22.11
  -2   8  -2 1079.54   20.85
   2   8  -2 1005.27   16.74
   2   8  -2 1107.58   24.18
  -2   8  -2 1032.05   22.05
   2  -8   2 1020.66   21.63
   2   8   2 1029.19   17.38
  -2  -8   2 1086.04   25.34
  -2   8   2 1091.41   22.49
   2   8   2 1045.49   23.14
  -8  -2  -2 1114.43   22.60
   2  -8  -2  976.08   19.39
   2   8  -3   85.33    4.79
   2   8   3   96.43    6.82
  -8  -2   3   95.63    6.29
  -2   8  -3   90.10    5.87
   2  -8   3   93.24    6.37
  -2  -8   3   93.41    7.40
   2  -8  -3   85.25    5.17
   2   8   3   97.79    5.12
  -2   8  -3   94.88    6.47
  -2  -8  -3   92.41    6.77
  -8  -2  -3   89.18    6.20
  -2   8   3   93.90    6.51
  -2   8   4 1179.24   24.52
   2   8   4 1134.24   20.14
   2   8  -4 1126.12   20.63
  -2   8  -4 1122.57   22.75
  -2   8  -4 1122.45   24.02
   2  -8   4 1110.52   23.86
  -2  -8   4 1184.49   27.31
  -8  -2   4 1112.85   22.95
  -2  -8  -4 1096.34   24.74
  -8  -2  -4 1187.56   24.32
   2   8   4 1150.69   24.33
   2  -8  -4 1089.38   20.41
  -2   8   5   30.98    4.05
  -2   8   5   27.25    3.13
  -2   8  -5   25.46    3.51
   2   8  -5   26.76    3.32
   2  -8   5   28.41    4.00
  -2  -8   5   29.98    4.66
  -8  -2   5   26.68    3.46
   2  -8  -5   25.69    2.89
  -8   2  -5   26.29    4.34
  -2  -8  -5   26.73    3.78
  -8  -2  -5   31.69    3.92
   2   8   5   28.34    3.96
   2   8   5   27.41    3.19
   2   8   6  714.01   19.67
  -2   8  -6  702.17   19.01
  -2   8   6  745.68   19.55
  -8   2  -6  704.13   20.38
   2   8  -6  715.94   17.92
  -2   8   6  708.61   16.67
  -2  -8   6  737.06   22.13
  -8  -2   6  696.18   18.00
   2  -8  -6  667.42   15.42
   2   8   6  719.08   16.72
  -2  -8  -6  730.67   19.88
   2   8   7   55.50    4.84
   2   8   7   54.88    5.78
  -2  -8  -7   55.72    5.67
  -8   2  -7   55.02    5.88
  -2   8   7   57.67    5.84
  -2   8  -7   54.62    5.62
   2   8  -7   52.88    5.18
  -2   8   7   60.61    5.03
  -8  -2   7   48.27    4.76
  -2  -8   7   58.47    6.70
  -8   2  -8   12.34    3.22
  -2   8   8   13.36    3.07
  -2  -8   8   12.66    3.63
  -2   8  -8   11.31    2.87
   2   8  -8   10.86    2.56
   2   8   8   11.16    2.31
  -8  -2   8   15.43    2.92
  -2   8   8    9.88    2.30
   2   8   8   11.88    2.70
  -2  -8  -8   12.07    2.84
  -2   8  -9   49.92    5.74
   2   8   9   50.03    5.60
   2   8   9   52.20    5.03
   2   8  -9   44.97    5.27
  -2   8   9   45.09    4.74
  -2  -8   9   52.53    6.43
  -8   2  -9   47.06    5.63
  -2  -8  -9   44.21    5.16
  -2   8   9   45.39    5.51
  -2   8  10   35.86    5.00
   2   8  10   34.06    4.84
  -8  -2 -10   28.38    3.81
  -8   2 -10   26.42    4.41
   2   8  10   31.40    3.99
   2   8 -10   34.36    4.92
  -2   8  10   32.74    3.98
  -2  -8 -10   30.11    4.31
  -2   8 -10   29.01    4.70
   2   8  11    1.84    0.93
   2   8  11    1.17    1.58
   2  -8  11    2.67    1.38
  -2   8  11    1.60    0.94
  -2   8 -11    1.14    1.84
   8   2  11    1.60    2.14
   2   8  11   -0.09    0.84
  -8   2 -11    1.66    2.05
  -2   8  11    2.07    1.72
  -2  -8 -11    0.90    1.73
   2   8 -11    0.80    2.28
   2   8  11   -1.01    1.65
  -2   8  11    0.96    1.97
   8   2  12  127.12    9.12
  -2   8 -12  120.13    3.98
   2   8 -12  119.33    4.26
   2   8  12  133.73    8.83
  -2   8 -12  130.12    9.91
   2   8 -12  122.07    9.66
  -2   8  12  138.94    5.45
  -2   8  12  138.76   10.11
   2  -8  12  136.66    5.09
  -2  -8  12  133.61    4.93
  -8   2 -12  127.73    9.72
  -2   8  12  126.86    8.17
  -2  -8 -12  137.32    9.71
   2   8  12  125.41    4.37
   2   8  12  123.52    5.01
   2   8  12  135.53    9.84
  -2   8  12  125.72    4.32
  -2   8  13    2.05    1.67
  -2   8 -13    1.59    0.78
  -2   8  13    2.12    1.26
   8   2  13    1.45    0.88
   8   2  13    1.65    1.81
  -2   8  13    1.41    1.95
   2   8 -13    0.95    0.83
  -8   2 -13    1.02    1.82
  -2   8 -13    2.30    2.10
   8   2 -13    1.04    2.13
   2   8  13    1.47    2.23
   2   8 -13    2.86    2.14
   2   8  13    3.16    1.89
  -2  -8  13    2.22    1.38
   2  -8  13    1.39    1.34
   2   8  13    2.62    1.02
  -2   8  13    2.18    0.88
  -2  -8 -13    1.85    1.58
   2   8  13    1.56    0.93
   2   8 -14   35.89    2.37
   8  -2  14   57.61    6.49
  -2   8 -14   60.25    7.14
   8   2  14   52.84    2.83
  -2   8 -14   54.05    2.67
   2   8  14   60.38    3.14
  -8   2 -14   51.05    6.74
   2   8 -14   53.75    7.01
   8   2 -14   56.72    7.98
   2   8  14   56.75    6.97
  -2   8  14   56.03    5.85
  -2   8  14   57.87    7.18
  -2   8  14   57.95    3.06
   2   8  14   65.37    6.44
   8   2  14   68.87    7.07
  -2  -8 -14   64.58    7.13
   2  -8  14   60.77    3.59
   2   8  14   56.73    3.58
  -2   8  14   64.67    3.99
  -2  -8  14   58.41    3.53
  -2   8 -15   19.13    4.49
  -8   2 -15   13.36    3.56
   2   8 -15   15.18    1.76
   2   8  15   16.28    3.44
   2   8  15   17.67    2.14
   8   2 -15   16.43    4.97
   2   8  15   18.01    4.37
   8   2  15   16.50    3.72
   2  -8  15   15.94    2.05
  -2  -8  15   16.45    2.16
   8  -2  15   14.79    3.70
  -2   8  15   14.86    4.06
   2   8 -15   15.70    4.38
   2  -8  15   17.77    2.34
  -2  -8 -15   16.87    3.78
   2   8  15   16.34    1.92
  -2  -8  15   18.28    2.43
  -2   8  15   15.07    2.16
  -2   8  15   17.23    1.89
   8   2  15   14.85    1.67
  -2   8  15   16.04    3.46
   8   2  16   54.62    6.53
   8  -2  16   46.64    5.93
   2   8  16   51.51    3.05
  -2  -8  16   52.66    3.47
  -2   8  16   53.59    3.08
  -8   2 -16   44.85    6.59
  -2  -8  16   53.98    3.66
   2   8  16   49.93    3.48
   2  -8  16   54.98    3.56
   2  -8  16   54.86    3.51
  -2   8  16   51.24    3.82
  -2   8 -16   55.39    7.52
   2   8 -16   59.39    7.86
   2   8 -16   48.80    2.78
   8   2 -16   50.64    7.83
   8  -2 -16   47.33    7.80
  -2   8  16   51.51    5.78
   2   8  16   50.28    6.01
   8   2  16   49.03    2.68
   2   8  17   53.69    3.10
  -2   8  17   57.75    3.97
   2   8  17   56.44    3.78
  -2  -8  17   51.08    3.37
  -2  -8  17   53.24    3.59
   8   2  17   51.44    2.68
   2   8 -17   48.68    2.79
  -8   2 -17   49.09    6.82
   2  -8  17   54.83    3.50
  -2   8  17   53.86    3.19
   8   2 -17   54.32    2.87
   2  -8  17   56.61    3.62
   8  -2  17   48.87    6.21
  -2  -8  18  115.31    5.11
   2   8  18  113.21    5.39
   2  -8  18  122.25    5.20
  -2   8  18  113.71    4.43
  -2  -8  18  111.52    4.77
  -2   8  18  121.41    5.69
   2   8  18  115.13    4.45
  -2   8  19    1.03    1.06
   2   8  19    0.34    1.15
   2  -8  19    0.79    1.08
  -2  -8  19   -0.09    0.94
  -2  -8  19    0.97    1.21
   2   8  19    2.38    1.12
  -2   8  19    1.20    1.14
  -2   8  20  164.04    5.22
  -2  -8  20  164.56    5.87
   2  -8  20  167.78    5.94
   2   8  20  169.53    6.33
   2   8  20  161.57    5.12
  -2   8  21    5.01    1.55
   2  -8  21    5.22    1.28
   2   8  21    5.81    1.15
  -2  -8  21    5.53    1.26
   2  -8  22  102.03    4.19
  -2  -8  22  101.58    4.22
  -2   8  22   95.91    3.77
   2   8  22   95.25    3.50
   2   8  23    0.21    0.81
  -2  -8  23    0.72    0.73
   2  -8  23    0.15    0.76
  -2   8  23   -1.62    2.03
   2   8  24   24.94    1.60
  -2  -8  24   30.19    1.98
  -2   8  24   23.62    2.43
   2  -8  24   28.87    1.97
   2  -8  25   -0.19    0.54
  -2  -8  25   -0.27    0.54
  -2  -8  26    9.62    0.90
   2  -8  26   10.65    0.96
   8   3   0    4.68    1.16
   3   8   0    3.90    1.03
   3   8   0    2.98    1.89
  -3   8   0    4.48    1.95
   3  -8   0    4.75    1.78
  -8  -3   0    3.63    1.88
  -3  -8   0    3.66    2.20
  -3   8   1    1.18    1.30
   8   3  -1    0.51    0.82
   3  -8  -1    0.50    1.00
  -3   8  -1   -0.43    1.24
   3   8   1    1.07    0.79
  -3   8  -1    0.99    1.18
  -3  -8   1   -1.15    2.35
  -3  -8  -1   -2.58    2.80
   8   3   1    0.72    0.65
  -8  -3  -1    1.31    1.77
  -8  -3   1    1.19    1.57
   3   8  -1    1.12    1.50
   3  -8   1    1.27    1.15
   3   8   1    1.60    1.64
  -3   8   2  122.17    7.11
  -8  -3   2  107.35    7.21
  -3  -8  -2  112.10    7.78
  -3   8  -2  109.97    6.56
   3   8  -2  103.35    4.62
   3   8  -2  115.60    7.61
   3  -8   2  101.50    6.24
   3  -8  -2  105.23    5.33
  -3  -8   2  131.21    9.00
   3   8   2  114.34    5.19
   3   8   2  115.62    7.33
  -8  -3  -2  110.96    7.41
  -3   8  -2  112.73    6.73
   3   8  -3   72.77    4.39
  -3   8  -3   67.24    5.21
  -8  -3   3   66.74    5.73
  -3  -8  -3   72.73    6.41
   3   8   3   66.35    4.22
  -8  -3  -3   67.18    5.76
  -3   8  -3   70.36    5.51
   3   8   3   64.47    5.58
  -3  -8   3   70.81    6.63
  -3   8   3   70.72    5.55
  -3   8  -4    4.77    1.92
   3   8   4    4.94    2.14
  -8  -3  -4    9.06    2.77
   3   8  -4    5.82    1.70
  -8  -3   4    6.75    2.45
   3   8   4    5.76    1.71
  -3  -8  -4    7.20    2.93
  -3  -8   4    4.54    2.86
  -3   8   4    5.34    2.01
  -3   8  -4    5.51    2.07
  -3  -8   5  175.19   10.71
  -3  -8  -5  166.63    9.59
  -3   8  -5  178.32    9.14
   3   8  -5  167.87    7.81
  -3   8  -5  178.07    8.89
  -8  -3   5  168.67    9.06
   3   8   5  171.38    7.53
  -3   8   5  177.34    8.98
  -8  -3  -5  165.27    9.19
  -8   3  -5  166.05   10.06
   3   8   5  171.11    9.13
   3   8   6    0.40    1.18
   3   8   6    0.95    1.53
  -3  -8   6    1.19    2.07
  -8  -3   6    1.92    1.51
  -3   8   6    0.20    1.57
  -3   8  -6    1.16    1.38
  -8   3  -6   -0.79    1.92
  -3  -8  -6   -0.92    1.93
   3   8  -6    1.19    1.58
  -8  -3  -6    0.52    1.60
   3   8   7  344.55   13.58
  -3   8   7  358.78   13.61
  -3   8  -7  344.13   13.85
   3   8  -7  332.95   12.67
   3   8   7  356.02   11.98
  -3   8   7  332.75   11.62
  -3  -8   7  339.21   15.56
  -8  -3   7  322.54   13.05
  -3  -8  -7  364.57   14.71
  -8  -3  -7  355.69   14.21
  -8   3  -7  329.20   14.40
   3   8   8    6.73    2.26
  -3  -8  -8    5.11    2.18
  -8  -3   8    6.22    1.90
  -3  -8   8    7.96    2.76
  -3   8  -8    7.05    2.44
  -3   8   8    6.74    2.47
   3   8  -8    7.13    2.20
  -3   8   8    7.00    1.98
  -8   3  -8    6.00    2.47
   3   8   8    6.74    2.05
   3   8   9  626.65   19.51
   3   8   9  635.75   17.93
  -8   3  -9  578.27   20.31
   3   8  -9  617.40   19.36
  -3   8   9  644.68   20.17
  -3   8  -9  633.47   20.28
  -3   8   9  611.22   17.07
  -8  -3   9  591.71   18.51
  -3  -8   9  618.18   22.34
  -3  -8  -9  628.50   20.29
   8   3   9  665.46   19.38
  -3   8  10    6.56    2.02
   3   8  10    6.50    1.89
   3   8  10    8.96    2.53
   8   3  10    6.98    2.26
  -3  -8 -10    7.05    2.60
  -8   3 -10    4.92    2.15
  -3   8 -10    8.03    2.57
  -3   8  10    9.20    2.59
   3   8 -10    6.03    2.30
  -3  -8  10    7.46    3.27
   8   3  11  355.13   14.70
   3   8 -11  313.41   14.99
   3  -8  11  333.23    8.02
   3   8  11  339.26   15.19
  -3  -8  11  341.76    8.22
  -3  -8 -11  344.92   15.61
  -8   3 -11  317.33   15.56
  -3   8 -11  332.82   15.54
  -3   8  11  351.15   15.82
  -3   8  11  317.63   13.03
   3   8  11  342.58   13.92
   3   8 -11  313.67    7.13
   3   8  11  318.52    8.02
  -3   8  11  328.19    7.10
   3   8  11  336.76    7.17
  -3   8  11  336.05    8.67
  -3   8  12    6.06    2.05
  -3  -8 -12    3.25    2.14
  -3   8  12    5.58    1.14
  -3   8 -12    5.29    1.01
  -3  -8  12    6.49    1.50
   3   8  12    5.13    1.13
   3   8  12    5.72    2.14
   3   8  12    5.46    2.38
   3   8 -12    4.62    1.11
   3   8  12    6.16    1.36
   8   3  12    5.56    2.07
  -3   8  12    5.98    2.63
  -8   3 -12    4.15    2.47
  -3   8 -12    3.29    2.50
   3   8 -12    6.07    2.94
   8   3 -12    6.37    3.66
   3  -8  12    4.97    1.43
  -3   8  12    5.92    1.43
  -3   8 -13  271.74    6.22
   8   3  13  273.26    6.74
  -3   8  13  300.04    8.57
  -3   8  13  296.01    6.92
  -3   8 -13  288.68   15.67
   3   8 -13  291.88   15.50
   3   8  13  288.34   15.00
  -3   8  13  299.50   15.80
   3   8  13  284.54    7.89
  -3   8  13  281.62   12.66
   3   8 -13  287.20    6.99
   3   8  13  291.39    6.98
  -3  -8 -13  300.39   15.44
   3   8  13  294.26   13.68
  -3  -8  13  298.58    8.00
   8   3 -13  297.60   17.66
   8   3  13  312.23   14.66
  -8   3 -13  285.32   15.42
   3   8  14    6.26    2.45
  -3   8  14    5.93    1.27
   3   8 -14    5.75    1.25
  -3   8  14    5.68    2.13
   3   8  14    6.41    1.29
   8   3  14    6.47    1.19
  -3  -8 -14    5.83    2.40
   8   3  14    4.89    1.95
  -8   3 -14    7.24    3.44
  -3   8 -14    6.04    2.60
  -3   8  14    5.43    1.40
  -3  -8  14    7.00    1.85
   3   8 -14    6.67    2.38
   8   3 -14    3.68    2.50
   3  -8  14    4.84    1.60
  -3   8  14    7.66    2.82
   3   8  14    6.66    1.44
   3   8  14    5.62    2.24
   8  -3  15  131.78   10.09
  -3  -8  15  141.60    5.48
   8   3  15  136.03    4.69
   8   3 -15  158.72   13.20
   8   3  15  141.97   10.32
  -3   8  15  143.62    4.88
   3   8 -15  135.00    4.81
   3   8  15  141.87    4.99
  -8   3 -15  128.60   10.85
  -3   8 -15  133.77   11.19
   3   8 -15  140.82   11.55
  -3  -8  15  141.80    5.74
   3  -8  15  143.65    5.61
  -3   8  15  132.95    9.17
  -3   8  15  139.29    6.16
   3   8  15  134.07   10.88
   3  -8  15  143.49    5.68
   3   8  15  146.60   10.12
  -3  -8 -15  143.94   11.20
   3   8  15  140.20    5.65
   8   3  16   12.40    3.18
   8   3  16   12.34    1.49
  -3   8  16   13.92    1.72
   3  -8  16   11.51    1.87
   3   8  16   12.61    3.22
  -3  -8  16   14.39    2.20
   3   8 -16   12.61    1.66
   8  -3  16   12.04    3.19
  -3  -8  16   12.03    1.81
  -3  -8 -16   10.67    3.38
  -8   3 -16    9.68    3.19
  -3   8  16   11.89    1.93
  -3   8 -16   15.78    4.35
   3   8 -16   15.27    4.48
   8   3 -16   10.11    3.78
   3   8  16   12.86    2.00
   8  -3 -16   12.54    4.35
  -3   8  16   10.57    2.92
   3   8  16   12.82    1.66
   8   3 -16   12.70    1.53
   8   3 -17   66.55    3.23
  -3  -8  17   65.88    3.92
  -3   8  17   72.05    3.61
  -3   8  17   68.65    4.39
   3   8  17   66.65    4.00
  -3  -8  17   64.52    3.78
   3   8  17   69.16    3.57
   3   8 -17   62.20    3.16
   8   3  17   64.38    3.14
   3  -8  17   70.59    3.95
   3   8 -18    2.88    0.99
  -3   8  18    1.43    1.17
   8   3  18    1.18    0.73
  -3  -8  18    0.93    1.03
   3  -8  18    2.42    1.13
  -3   8  18    2.85    1.38
  -3  -8  18    0.41    1.30
   8   3 -18    2.69    0.97
   3   8  18    1.51    1.02
   3   8  18    1.76    1.13
  -3   8  19    3.59    1.37
   8   3  19    4.94    1.10
   3   8  19    4.24    1.43
  -3  -8  19    3.43    1.12
   3  -8  19    4.11    1.18
  -3  -8  19    5.20    1.44
   3   8  19    4.60    1.19
   3   8  20    2.14    1.10
  -3  -8  20    0.86    1.06
   3  -8  20    1.69    0.99
  -3   8  20    3.37    1.61
  -3  -8  20   -0.49    1.19
  -3  -8  21    3.70    1.14
   3  -8  21    3.62    1.19
  -3   8  21    3.83    1.97
   3   8  21    4.17    1.11
   3   8  22   -0.26    0.73
   3  -8  22    0.33    0.84
  -3   8  22    0.98    2.33
  -3  -8  22    1.02    0.92
  -3  -8  23    1.13    0.79
   3  -8  23    0.70    0.75
  -3   8  23    1.07    2.39
   3   8  23    1.07    0.71
   3  -8  24    0.25    0.58
   3   8  24    0.07    0.72
  -3  -8  24    0.79    0.68
  -3  -8  25   10.01    1.02
   3  -8  25    9.26    0.99
   4   8   0   48.57    5.01
   8   4   0   42.97    3.39
  -4  -8   0   56.03    6.35
  -8  -4   0   49.90    5.31
  -4   8   0   50.06    4.57
   4   8   1   17.80    3.10
   8   4  -1   16.90    2.13
   4   8  -1   19.57    3.38
  -4   8   1   17.12    2.83
   4   8   1   16.46    1.88
  -4  -8  -1   23.42    4.63
  -8  -4   1   21.09    3.91
   8   4   1   15.53    1.92
  -4   8  -1   18.41    2.81
  -8  -4  -1   18.29    3.46
  -4  -8   1   17.66    4.02
  -4   8  -2  499.36   15.23
   8   4   2  465.99   10.80
   4   8  -2  497.42   16.00
  -4  -8   2  524.95   18.63
  -8  -4   2  487.86   16.45
  -4   8  -2  497.42   13.84
  -4  -8  -2  479.80   17.09
   4   8   2  489.65   11.31
  -8  -4  -2  510.23   16.49
   4   8   2  487.37   15.38
  -4   8   2  514.43   14.69
  -4  -8   3   33.27    5.14
   4   8   3   34.39    4.24
   4   8  -3   31.00    2.91
  -4   8  -3   35.60    3.71
  -8  -4   3   33.14    4.50
  -4  -8  -3   30.32    4.22
  -8  -4  -3   35.56    4.47
   4   8   3   32.58    3.02
  -4   8  -3   35.21    4.19
  -4   8   3   36.90    3.92
   8   4   3   34.49    2.81
  -4   8  -4  266.82   10.32
   4   8   4  259.97   11.24
  -4   8  -4  259.61   11.52
   4   8  -4  256.99    9.24
  -4   8   4  286.19   11.16
   4   8   4  272.29    9.35
  -4  -8   4  273.96   13.63
  -8  -4   4  270.89   12.47
  -4  -8  -4  271.48   12.68
  -8  -4  -4  281.22   12.38
  -4   8   5   35.60    4.16
   4   8   5   37.27    4.41
  -8   4  -5   34.26    4.96
   4   8  -5   31.33    3.48
  -4   8  -5   34.39    3.80
  -4   8  -5   32.14    4.23
  -4  -8   5   35.38    5.04
  -8  -4   5   35.79    4.76
  -8  -4  -5   34.91    4.48
   4   8   5   36.36    3.54
  -4  -8  -5   38.38    4.96
   4   8   6  155.57    8.98
  -4   8   6  163.94    8.92
  -8   4  -6  140.51    9.90
  -8  -4  -6  157.38    9.54
  -4   8  -6  161.10    9.38
   4   8  -6  147.08    8.04
  -4   8  -6  147.89    8.07
  -4  -8   6  167.13   10.94
  -8  -4   6  144.62    9.24
  -4  -8  -6  151.39    9.74
   4   8   6  151.65    7.61
  -4   8  -7    9.73    2.72
  -4  -8  -7   11.94    3.22
   4   8   7   10.03    2.22
   8   4   7    9.25    2.29
  -4  -8   7    7.69    2.91
  -8   4  -7    7.66    2.75
  -4   8   7    9.55    2.55
  -8  -4  -7    9.30    2.95
   4   8  -7   10.76    2.61
  -4   8  -7    9.00    2.20
  -8  -4   7   10.70    2.56
   4   8   7    8.31    2.46
  -4   8   8  126.46    8.47
   4   8  -8  110.74    7.82
   4   8   8  131.17    7.61
  -4   8  -8  114.71    8.48
   8   4   8  131.31    8.15
  -8  -4   8  122.84    8.74
  -4  -8   8  116.11    9.61
  -4  -8  -8  129.73    9.24
  -8  -4  -8  124.95    8.75
   4   8   8  112.17    8.04
  -8   4  -8  114.89    8.98
  -4  -8   9   11.19    3.34
   4   8   9    9.76    2.40
  -4   8   9   10.45    2.97
  -4  -8  -9   10.52    3.49
  -8  -4   9    8.43    2.51
  -8  -4  -9    9.23    2.73
   8   4   9   10.42    2.83
  -8   4  -9    6.78    2.92
  -4   8  -9    9.69    3.04
   4   8  -9   12.43    3.04
   4   8   9   10.07    2.79
   4   8  10    1.25    1.25
  -4  -8  10    1.42    1.90
  -4   8  10    0.34    0.69
   4   8  10    1.07    0.70
  -8   4  10    6.51    2.66
  -4  -8 -10    0.79    1.68
  -4   8  10    0.66    1.63
  -8   4 -10   -0.03    1.67
  -4   8 -10    1.14    1.60
   4   8  10    1.61    1.75
   4  -8  10   -0.67    1.09
   4   8 -10    0.39    1.56
   8   4  10    2.31    1.38
  -8  -4  10   -0.33    1.90
   4   8 -10    0.17    0.88
  -8  -4 -10    0.08    2.43
   4   8 -11   19.41    1.83
  -4  -8  11   22.89    2.29
   4   8  11   21.14    1.91
  -8   4  11   20.43    2.96
  -8   4 -11   17.46    4.19
  -4   8 -11   23.45    4.66
  -4   8  11   20.23    3.83
   4   8 -11   19.52    4.03
   4   8  11   23.03    3.87
   8   4 -11   23.05    4.86
  -4  -8 -11   24.34    4.39
  -4   8  11   18.01    2.13
   4  -8  11   24.63    2.36
  -8  -4 -11   22.25    4.27
  -4   8  11   21.32    1.84
   8   4  11   23.76    4.16
   4   8  11   22.86    4.06
   4  -8  12   16.11    2.04
   4   8  12   16.89    1.71
  -4  -8 -12   18.20    4.21
  -8   4  12    7.28    3.19
  -4   8 -12   15.34    1.45
   4   8  12   13.52    3.21
  -4   8  12   17.22    1.71
   8   4  12   15.18    3.31
   4   8  12   14.60    1.85
  -8   4 -12   13.19    3.61
  -4   8 -12   16.51    4.03
   4   8 -12   16.81    3.94
   8   4 -12   14.22    3.90
  -4   8  12   21.56    4.29
   4   8  12   13.23    3.42
   4   8 -12   14.64    1.62
  -4  -8  12   16.48    2.04
  -8  -4 -12   14.60    3.86
  -8   4  13   26.15    3.12
   8   4 -13   42.40    6.74
  -4   8  13   42.44    3.24
   4  -8  13   61.46    5.62
   4   8  13   42.86    2.75
   4   8  13   38.75    2.85
  -4   8 -13   42.49    6.22
  -4   8  13   41.90    2.57
   4   8 -13   43.07    6.07
  -8   4 -13   42.66    6.42
  -4   8  13   42.12    6.09
  -4  -8  13   42.75    2.98
  -4  -8 -13   40.10    5.85
  -8  -4 -13   44.22    6.20
   8   4  13   38.51    2.60
   4   8 -13   42.72    2.83
   4   8  13   46.57    5.62
   4   8  13   41.76    5.80
   8   4  13   41.95    5.65
   4  -8  14  109.72    4.86
   4   8 -14  104.01    4.23
   4   8  14  108.86    4.29
  -4   8  14  109.62    5.27
   8   4 -14  109.72    4.16
   8   4  14  107.94    4.25
   4  -8  14  112.81    4.91
   4   8  14  101.86    4.67
  -4  -8  14  109.91    4.78
  -4  -8  14  106.76    4.92
  -8   4 -14   99.87    9.54
  -4   8 -14  110.37    9.99
   4   8 -14   99.06    9.50
  -8   4  14  115.48    5.34
   4   8  14  103.45    9.22
  -4  -8 -14  114.88   10.01
  -8  -4 -14  121.96   10.58
   4   8  14  117.16    8.86
   8   4 -14  104.07   10.49
  -4   8  14  121.90    4.81
   8   4  14  120.11    9.21
  -4  -8  15   18.52    2.17
   4   8 -15   19.76    1.99
   8   4 -15   21.84    1.99
   4   8 -15   21.08    4.75
  -4   8  15   21.52    2.08
  -8  -4 -15   21.02    4.92
   4  -8  15   20.74    2.34
   8  -4  15   16.21    3.57
  -8   4 -15   19.07    4.52
  -4   8 -15   18.06    4.05
   8   4 -15   21.24    5.20
   4   8  15   17.54    2.09
   4   8  15   14.95    3.62
   4   8  15   21.85    4.13
   4   8  15   20.97    2.04
  -4  -8 -15   20.12    4.66
   8   4  15   21.05    2.00
   8   4  15   22.14    4.23
  -4   8  15   19.66    2.42
  -4  -8  15   19.61    2.30
   8   4 -16  176.83    5.38
   4   8 -16  161.42    5.43
   4   8  16  173.77    5.58
   8   4  16  179.20   11.83
  -4  -8  16  172.61    6.20
   4  -8  16  175.65    6.13
   8  -4  16  151.36   10.57
  -8   4 -16  166.29   12.59
  -4   8 -16  155.93   12.56
   4   8 -16  162.45   12.74
   8   4  16  171.29    5.35
   8   4 -16  170.43   13.97
   8  -4 -16  163.00   14.23
  -4   8  16  177.09    6.85
  -4  -8  16  162.45    5.94
   4   8  16  176.79   11.44
  -4  -8 -16  156.17   12.27
  -8  -4 -16  195.69   13.98
  -4   8  16  174.38    5.62
   4   8  16  172.88    6.22
   8   4 -17    1.74    1.01
  -4  -8  17    0.18    1.59
   8   4  17    1.69    0.94
   4   8  17    1.87    1.05
   4   8  17    1.21    1.07
  -4  -8  17    1.37    0.99
   4  -8  17    2.69    1.13
   4   8 -17    0.81    0.88
  -4   8  17    1.70    1.37
   8   4 -18  133.28    4.55
  -4  -8  18  130.95    5.31
  -4  -8  18  129.44    5.10
   4   8 -18  132.12    4.62
   4   8  18  138.69    4.96
  -4   8  18  137.15    5.05
   8   4  18  135.87    4.53
   4  -8  18  140.13    5.37
   4  -8  19    7.29    1.47
   8   4  19    6.44    1.15
   4   8 -19    6.88    1.21
  -4  -8  19    6.25    1.36
   4   8  19    7.47    1.41
  -4  -8  19    6.53    1.49
  -4   8  19    6.84    2.04
   8   4 -19    5.95    1.11
   4   8  20  203.81    5.72
  -4  -8  20  212.78    6.37
  -4   8  20  205.58    6.18
   4  -8  20  211.80    6.31
   8   4  20  191.57    5.02
   4   8  21    2.55    0.95
  -4  -8  21    1.92    0.89
   4  -8  21    2.26    0.94
  -4   8  21    1.47    2.70
   4   8  22   78.79    3.08
  -4  -8  22   82.05    3.58
   4  -8  22   83.38    3.50
  -4  -8  23   -1.22    0.75
   4  -8  23   -0.21    0.57
   4   8  23   -0.05    0.59
   4   8  24   42.34    1.79
  -4  -8  24   47.02    2.24
   4  -8  24   47.10    2.23
  -4  -8  25    0.76    0.47
   4  -8  25   -0.15    0.45
  -5   8   0   41.71    3.91
  -5  -8   0   42.14    5.47
   5   8   0   37.50    4.50
   8   5   0   37.98    3.57
  -8  -5   0   37.99    4.95
   5   8  -1    1.51    1.32
   8   5   1    1.04    1.04
  -8  -5   1    0.23    1.80
   8   5  -1    2.38    1.35
  -8  -5  -1    0.91    1.86
  -5  -8   1    0.65    2.13
   8   5   1    1.90    0.98
  -5  -8  -1   -0.29    2.15
  -5   8   1    0.35    1.19
  -5   8  -1    0.90    0.96
   5   8   1    0.60    1.32
  -5  -8   2  119.94    9.38
  -5   8   2  111.82    6.61
  -8  -5  -2  111.68    7.98
   8   5  -2  108.93    6.12
   5   8  -2  116.97    7.71
   8   5   2  120.95    6.01
  -8  -5   2  120.19    8.63
  -5  -8  -2  117.78    8.70
   5   8   2  113.47    7.31
   5   8   2  117.35    5.36
  -5   8  -2  117.96    6.35
   8   5   2  111.71    5.61
  -5   8   3   65.74    5.17
   8   5   3   70.23    4.86
   5   8   3   63.83    4.25
  -5   8  -3   65.31    4.74
  -5   8  -3   64.39    5.93
   5   8  -3   65.36    6.04
  -5  -8   3   68.90    7.05
  -8  -5   3   64.77    6.56
  -5  -8  -3   60.30    6.17
   8   5   3   61.83    4.17
  -8  -5  -3   65.21    6.21
   5   8   3   62.55    5.56
  -5   8  -4    2.98    1.61
   5   8   4    3.81    1.35
  -5   8  -4    3.68    2.15
  -5  -8   4    2.54    2.50
   8   5   4    2.33    1.30
   5   8   4    5.68    2.30
  -8  -5   4    4.78    2.69
  -5  -8  -4    4.90    3.25
  -5   8   4    3.69    1.78
  -8  -5  -4    2.29    2.44
   8   5   4    2.96    1.25
   5   8  -4    3.21    1.34
   8   5   5  517.23   14.74
  -5  -8  -5  491.73   18.08
  -8   5  -5  510.50   18.59
  -5   8  -5  499.53   17.20
   5   8   5  498.23   13.69
   5   8  -5  489.64   14.41
  -5   8  -5  487.14   13.73
  -5  -8   5  525.30   19.98
  -8  -5   5  492.81   18.13
  -5   8   5  519.07   15.68
  -8  -5  -5  474.91   17.46
   5   8   5  501.52   16.11
   8   5   6   18.27    3.00
   5   8  -6   17.39    3.07
  -8   5  -6   14.75    3.38
  -5   8  -6   13.21    3.02
  -5   8  -6   15.37    2.56
  -5   8   6   16.60    2.99
  -5  -8   6   17.16    3.97
   5   8   6   14.57    2.55
  -8  -5  -6   19.13    3.69
  -5  -8  -6   13.78    3.35
   5   8   6   17.31    3.31
  -8  -5   6   14.86    3.30
   8   5   7  330.72   12.56
  -5   8  -7  312.80   11.46
   5   8   7  328.17   13.33
  -5   8   7  342.05   13.67
  -5  -8   7  335.30   16.39
  -8   5  -7  316.37   14.88
  -5   8  -7  332.74   14.71
   5   8  -7  315.58   12.95
  -8  -5   7  307.83   14.66
   5   8   7  331.61   11.90
  -5  -8  -7  326.77   15.14
  -8  -5  -7  328.99   14.87
   5   8   8    1.72    1.58
  -8  -5  -8   -0.01    1.71
  -8  -5   8   -0.84    1.91
  -5   8   8   -0.42    1.57
  -5  -8  -8    0.71    2.04
   8   5   8   -0.47    1.34
  -5   8  -8    0.03    1.02
  -5   8  -8    0.17    1.68
   5   8  -8   -0.91    1.61
  -8   5  -8   -0.04    1.74
  -5  -8   8    0.87    2.22
   5   8   8   -1.72    1.28
  -8   5   9  470.15    9.04
   5   8  -9  457.34   17.35
   8   5   9  478.94   16.09
  -8   5  -9  443.14   18.39
  -5   8  -9  448.33   18.17
  -5   8   9  488.93   17.73
   5   8   9  434.47   16.24
   8   5  -9  442.28   18.59
  -8  -5   9  439.10   18.00
  -5  -8   9  472.88   20.10
  -5  -8  -9  470.05   18.47
  -8  -5  -9  471.31   18.49
   5   8   9  483.86   15.87
  -8  -5 -10    9.20    2.89
  -5   8  10    9.58    1.33
   5   8  10    8.40    1.27
   5   8 -10    9.72    1.28
  -5  -8  10    8.73    1.77
  -8   5 -10    6.54    2.60
   8   5  10    9.36    2.59
  -5  -8  10   10.42    3.40
  -5   8 -10    9.23    2.70
   5   8 -10    9.56    2.81
   8   5 -10   11.07    3.46
   5   8  10   10.19    2.82
  -8   5  10    4.41    2.39
  -5   8  10    9.63    2.73
  -8  -5  10    9.94    3.26
  -5  -8 -10   11.24    3.11
   5   8  10    9.82    2.51
  -5   8  10    7.13    1.84
  -5   8  11  240.41    6.15
  -8   5  11  236.80    6.72
   5   8 -11  231.90    6.16
   8   5  11  259.17   12.86
   5  -8  11  231.99    6.83
  -5   8  11  213.22    6.76
   5   8  11  242.31   12.74
  -8   5 -11  229.39   13.78
  -5   8 -11  236.75   13.93
  -8  -5  11  214.99    6.75
   5   8 -11  233.18   13.35
   5   8  11  262.15   12.32
  -5  -8  11  240.39    7.17
   8   5 -11  228.00   14.24
   5   8  11  228.19    6.17
  -5  -8  11  238.25   14.64
  -5   8  11  242.25   13.55
  -5  -8 -11  238.04   13.73
  -8  -5 -11  246.90   13.95
  -5   8 -11  222.18    5.55
   5   8  12   37.81    2.48
   5   8 -12   34.27    2.44
   5   8  12   38.85    4.91
  -5   8 -12   33.71    2.11
  -5   8 -12   37.83    5.63
  -8  -5 -12   43.84    6.15
   8   5  12   40.38    2.58
  -8   5 -12   35.12    5.68
   5   8  12   39.63    5.47
   8   5  12   41.57    5.39
   5   8 -12   35.09    5.32
   8   5 -12   34.16    5.82
  -5   8  12   42.08    5.82
  -5  -8 -12   40.11    5.92
  -5  -8  12   40.59    3.16
  -8   5  12   40.54    3.65
  -5   8  12   37.55    2.48
   8   5 -13  234.56    6.27
   5   8 -13  221.95    6.43
  -8   5 -13  225.34   14.37
   5   8  13  231.13    6.44
   8   5  13  245.14   13.06
  -5   8  13  239.44    6.36
  -5   8 -13  250.83   14.87
   5   8 -13  218.87   13.82
   8   5 -13  239.68   15.33
   5   8  13  222.44   13.07
  -5  -8  13  267.01    7.62
  -5  -8  13  234.05    7.08
  -5  -8 -13  243.94   14.68
  -8  -5 -13  239.55   14.70
  -8   5  13  237.04    7.14
   8   5  13  229.08    6.42
   5   8  13  256.14   13.10
  -5   8  14   10.73    1.66
   5   8  14   10.06    2.71
   5   8  14   10.16    1.64
  -5  -8 -14    9.79    3.42
   8   5  14   10.12    2.95
  -8  -5 -14   12.74    3.81
  -8   5  14    3.71    3.85
  -8   5 -14    8.58    3.40
  -5  -8  14   11.00    1.70
   5   8  14    9.60    3.18
  -5   8 -14   10.52    3.32
   5   8 -14   11.51    3.52
   8   5 -14   11.56    1.60
   8   5 -14   12.29    4.29
   5  -8  14   11.34    1.63
   8   5  14   11.52    1.59
  -5  -8  14   11.08    1.83
   5   8 -14   11.56    1.76
   5   8 -15   56.12    3.24
   5   8  15   56.65    3.25
   8   5  15   57.90    6.64
  -5   8 -15   51.72    7.19
  -5  -8  15   54.06    3.50
   5   8  15   56.60    6.53
  -5  -8  15   53.80    3.45
  -8   5 -15   49.35    6.98
   5   8 -15   51.10    7.03
   8   5 -15   55.02    3.08
  -8   5  15   46.36    4.36
   8   5 -15   60.25    8.04
  -5  -8 -15   54.56    7.20
  -8  -5 -15   61.17    7.84
   8  -5  15   44.30    5.67
  -5   8  15   57.93    3.34
   8   5  15   54.27    3.05
   5  -8  15   56.14    3.38
  -5   8  16    9.43    1.87
   8   5 -16    9.69    1.54
   8   5  16    7.23    1.29
  -5  -8  16    8.89    1.52
   5  -8  16    8.44    1.47
   5   8  16    9.98    1.56
   5   8 -16    9.28    1.62
  -5  -8  16    9.65    1.96
  -5  -8  17   83.28    4.09
  -5  -8  17   73.96    3.93
  -5   8  17   86.94    4.10
   5   8 -17   80.15    3.82
   8   5 -17   86.41    3.88
   5  -8  17   82.78    4.01
   8   5  17   76.18    3.56
   5   8  17   81.90    3.95
  -5  -8  18    2.19    1.35
   5   8  18    1.75    1.04
  -5   8  18    2.19    2.14
  -5  -8  18    4.01    1.21
   5  -8  18    3.68    1.08
   5   8 -18    4.95    1.28
   8   5  18    2.66    0.96
   8   5 -18    2.63    0.98
   5   8  19   14.16    1.75
   8   5 -19   14.20    1.55
   5  -8  19   13.01    1.63
   8   5  19   13.40    1.52
  -5  -8  19   13.02    1.62
  -5   8  19   12.49    2.89
   5   8 -19   13.33    1.53
   5  -8  20    2.12    0.90
  -5  -8  20    3.47    1.20
   8   5  20    1.82    0.75
   5   8  20    2.08    1.00
  -5   8  20    0.69    2.97
   8   5  21    0.33    0.60
   5  -8  21    0.90    0.76
   5   8  21    0.98    0.85
  -5  -8  21    0.25    0.71
  -5  -8  22    1.45    0.76
   5  -8  22    0.97    0.70
   5   8  22    1.69    0.75
  -5  -8  23   10.90    1.19
   5  -8  23   11.08    1.17
   5   8  23   10.48    1.04
   5   8  24    1.42    0.61
   5  -8  24    0.16    0.46
  -5  -8  24    0.02    0.45
  -6   8   0  611.38   14.96
  -6  -8   0  608.49   21.03
   6   8   0  579.46   17.09
   8   6   0  587.41   15.10
  -8  -6   0  601.90   20.00
   8   6   1   12.88    1.85
  -8  -6   1   14.72    3.69
  -6  -8  -1   15.38    3.78
  -6  -8   1   16.81    3.62
   8   6   1   13.10    2.25
  -8  -6  -1   14.19    3.60
   6   8  -1   15.76    3.00
   6   8   1   14.04    2.82
  -6   8  -1   13.21    2.21
  -6   8   1   12.57    2.27
   8   6  -1   12.33    2.32
   6   8   2   69.94    5.78
   6   8  -2   66.31    6.02
   8   6   2   69.11    4.87
   8   6   2   70.16    4.49
   8   6  -2   62.93    5.13
  -6   8  -2   67.72    4.65
  -6  -8   2   77.14    7.85
  -8  -6   2   71.35    7.10
  -6  -8  -2   71.48    7.34
  -8  -6  -2   73.71    7.03
  -6   8   2   72.74    5.27
  -8  -6   3    6.21    2.76
  -6   8   3    5.51    1.75
   6   8   3    5.49    1.96
   6   8   3    5.34    1.40
  -6  -8   3    6.49    3.21
   8   6   3    5.66    1.50
  -6   8  -3    4.78    1.41
  -6  -8  -3    7.30    2.67
  -8  -6  -3    9.22    3.08
   8   6   3    7.78    1.77
   8   6  -3    3.64    1.40
   6   8  -3    6.53    2.24
   6   8   4  352.68   13.26
   6   8   4  368.15   11.17
  -6  -8   4  376.89   16.95
  -8  -6   4  377.58   16.35
  -6  -8  -4  356.42   15.57
  -8  -6  -4  364.69   15.42
  -6   8  -4  370.14   15.27
   8   6   4  379.92   11.87
  -6   8   4  376.07   12.84
   8   6   4  358.67   11.51
  -8  -6  -5    3.15    2.44
   6   8   5    2.00    1.23
  -6   8  -5    1.51    2.13
   8   6   5    1.41    1.46
  -8  -6   5    1.34    1.88
  -6  -8   5    2.00    2.49
  -8   6  -5    1.41    2.29
   6   8   5    0.70    1.21
  -6   8   5    1.55    1.40
   8   6   5    0.60    1.01
  -6  -8  -5    2.16    2.07
   6   8   6  136.45    8.36
  -6   8   6  156.06    8.83
   6   8  -6  133.63    8.00
   8   6  -6  135.55    9.01
  -6   8  -6  146.55    9.87
  -6  -8   6  144.09   10.85
  -8  -6   6  139.59   10.22
  -8   6  -6  144.17   10.10
   6   8   6  146.28    7.70
  -6  -8  -6  144.71   10.19
  -8  -6  -6  154.98   10.66
   8   6   6  146.52    8.11
   6   8   7    9.46    2.37
   8   6   7    9.30    2.41
   6   8   7    9.78    2.33
  -6  -8   7   10.30    3.58
  -6   8   7    9.99    2.68
  -6   8  -7   10.04    3.16
   8   6  -7    9.78    2.83
  -8   6  -7    9.73    3.21
   6   8  -7    8.72    2.58
  -8  -6  -7   10.02    3.45
  -6  -8  -7   10.26    3.60
  -8  -6   7    6.58    2.75
  -8   6   8   38.56    3.16
   6   8   8   28.70    4.07
   8   6   8   33.58    4.27
   6   8   8   30.95    2.16
  -6  -8   8   29.85    5.19
   8   6  -8   32.85    4.90
  -8   6  -8   30.86    5.08
  -6   8  -8   28.40    4.83
   6   8  -8   32.52    4.52
  -6   8   8   33.13    4.48
   6   8  -8   31.91    2.17
  -8   6   8   31.17    2.62
  -8  -6   8   31.13    5.03
   6   8   8   33.08    4.07
  -6  -8  -8   34.36    5.50
  -8  -6  -8   31.47    5.02
   6   8   9    0.47    1.38
   6   8   9    2.47    1.60
  -8  -6   9    1.82    2.24
  -6  -8   9    0.65    1.96
  -6  -8   9    2.12    1.71
  -8   6   9    0.18    1.52
   8   6   9   -0.02    1.40
  -6  -8  -9    0.22    2.04
  -8  -6   9    9.39    2.35
  -8   6  -9    0.07    1.77
  -6   8  -9   -0.30    1.78
   8   6  -9   -0.18    1.62
   6   8  -9   -0.44    1.62
  -6   8   9    1.15    1.59
   6   8   9    1.44    0.91
  -8  -6  -9    0.09    2.09
  -6   8   9   -0.42    1.59
  -6   8  -9    0.09    0.73
  -6   8   9    1.64    1.02
  -8   6   9   -1.93    2.48
   6   8  -9    0.53    0.84
   6   8  10   12.73    1.55
  -6   8 -10   14.67    3.83
  -6   8  10   13.65    1.60
   6   8 -10   11.58    1.35
   6   8 -10   15.96    1.76
   6   8  10   12.55    2.87
  -8   6 -10   11.56    3.46
   8   6  10   11.16    2.78
  -8   6 -10   11.64    1.24
  -8  -6  10   11.88    2.07
  -6   8  10   11.61    3.01
  -6  -8  10   12.59    3.88
  -6  -8  10   12.93    2.07
   6   8 -10   13.71    3.55
   8   6 -10    9.91    3.12
  -8  -6 -10   15.11    3.89
   6   8  10   14.52    3.23
  -8  -6  10    8.19    2.96
  -6   8 -10   11.85    1.40
  -8   6  10   12.44    2.78
   8   6 -10   11.42    1.41
  -6   8  10   13.45    2.01
   6   8  11   18.68    3.47
   6   8 -11   15.88    1.81
   6   8  11   16.30    3.57
   8   6  11   16.13    1.84
  -8  -6 -11   18.85    4.28
  -6   8 -11   16.54    1.73
   8   6 -11   12.98    3.37
   6   8  11   15.98    1.79
  -8  -6  11   13.85    2.11
  -8   6 -11   15.39    4.19
  -6   8 -11   15.31    3.86
  -6  -8 -11   14.62    3.81
   6   8 -11   14.86    3.55
  -6   8  11   16.59    3.65
  -6  -8  11   14.88    3.93
  -6   8  11   16.33    3.98
   8   6 -11   16.16    1.63
  -8   6  11   18.79    3.29
  -6   8  11   16.66    2.19
   8   6  11   16.39    3.52
   6   8 -12   18.63    1.92
   8   6  12   18.39    1.89
  -6  -8 -12   17.10    4.01
  -6   8  12   18.76    2.16
  -8   6 -12   17.44    4.31
  -6  -8  12   26.06    3.24
  -6   8 -12   17.37    1.53
   6   8  12   18.25    1.86
   6   8  12   19.79    3.77
   6   8  12   23.00    3.95
  -6   8 -12   18.46    4.42
   6   8 -12   18.10    4.09
   8   6 -12   14.95    3.82
  -8  -6  12   15.12    2.15
  -8  -6 -12   16.23    3.81
   8   6 -12   17.95    1.79
   8   6  12   20.08    3.79
   8   6  13    4.59    2.21
   8   6 -13    6.22    2.96
  -8   6  13    0.43    3.43
   6   8  13    4.49    1.24
   8   6  13    4.53    1.22
   6   8  13    0.51    1.85
   8   6 -13    5.18    1.28
  -6  -8  13    2.35    1.52
  -8  -6  13    5.70    1.62
   6   8  13    2.47    1.75
  -8   6 -13    4.59    2.79
  -6   8 -13   10.70    4.77
  -6  -8  13    4.46    1.21
   6  -8  13    4.45    1.17
   6   8 -13    5.30    2.71
  -8  -6 -13    4.56    2.61
  -6  -8 -13    4.05    2.92
   6   8 -13    6.45    1.50
  -6   8  13    4.53    1.75
   6   8  14   21.59    2.06
   6   8 -14   19.15    2.07
   8   6 -14   20.78    2.00
   8   6  14   20.55    4.12
  -6  -8  14   18.95    2.33
   8   6  14   20.69    2.12
  -6  -8  14   18.94    2.03
  -8  -6 -14   20.05    4.83
   6   8  14   20.66    3.91
   6  -8  14   20.85    2.05
  -6   8  14   24.93    2.80
  -8   6 -14   19.30    4.74
  -6   8 -14   16.53    4.44
   6   8 -14   17.98    4.28
   8   6 -14   19.16    4.89
  -6  -8 -14   19.13    4.40
  -6  -8 -15   12.02    3.98
  -8   6  15    8.94    3.97
   8   6  15   10.25    1.51
   6   8 -15   10.32    1.60
   8   6  15   10.87    3.00
   6   8  15    9.75    2.76
  -6  -8  15   10.20    1.59
   6  -8  15   10.02    1.50
  -8   6 -15   10.19    3.66
  -6   8 -15    6.81    3.48
   6   8 -15    7.07    2.83
   8   6 -15    4.24    2.63
   6   8  15    9.22    1.50
  -6  -8  15   10.46    1.91
  -8  -6 -15    8.29    3.37
   8   6 -15   10.11    1.54
  -6   8  15   10.74    2.49
  -8   6  16    7.68    3.92
   6   8 -16    6.55    1.49
  -6  -8  16    4.04    1.52
   8   6 -16    7.58    1.46
   8   6  16    6.42    1.50
  -6  -8  16    6.16    1.32
   6  -8  16    6.38    1.26
   6   8  16    7.44    1.61
  -6   8  16   12.25    2.85
   6   8 -17   -0.25    1.05
   8   6 -17   -0.21    0.96
   8   6  17    0.83    0.95
   6   8  17    0.13    1.02
  -6  -8  17    0.39    0.74
   6  -8  17    1.34    0.91
  -6  -8  17    0.89    1.24
   6   8  18  109.51    4.32
   6  -8  18  103.26    4.20
  -6  -8  18  102.36    4.27
   6   8 -18  103.77    4.17
  -6  -8  18   94.13    4.14
  -6   8  18  112.18    5.56
   8   6  18  104.77    4.15
   8   6 -18  104.41    4.16
  -6  -8  19    1.62    0.86
   6   8  19    1.11    0.96
   8   6 -19   -0.11    0.85
   8   6  19    1.66    0.93
   6   8 -19    1.76    0.85
   6  -8  19    1.13    0.73
   6  -8  20   52.86    2.78
   8   6  20   50.98    2.61
   8   6 -20   55.24    2.72
   6   8  20   52.06    2.75
  -6   8  20   53.53    4.41
   6   8 -20   51.92    2.61
  -6  -8  20   55.68    2.89
   6   8  21    0.15    0.73
   8   6  21    0.86    0.73
  -6  -8  21   -0.89    0.74
   6  -8  21    0.86    0.66
  -6  -8  22   94.74    3.32
   8   6  22   92.68    2.86
   6   8  22   99.94    3.23
   6  -8  22   95.56    3.34
   6  -8  23    0.34    0.55
   6   8  23    0.12    0.49
  -6  -8  23    0.72    0.48
   6  -8  24   27.01    1.37
   7   8   0  133.47    8.04
   8   7   0  135.17    7.67
  -7  -8   0  140.13   10.53
  -8  -7   0  150.62   10.40
   7   8  -1   28.00    3.85
   8   7  -1   27.52    3.50
  -7  -8   1   28.91    5.09
  -8  -7   1   34.89    5.39
  -7  -8  -1   28.81    5.04
  -8  -7  -1   29.26    4.82
   7   8   1   27.13    3.67
   8   7   1   25.89    3.34
   7   8   2    6.82    2.01
   8   7   2    5.48    1.75
  -7  -8   2    8.36    3.41
  -8  -7   2    8.27    3.18
  -8  -7  -2    8.31    3.06
   7   8  -2    7.63    2.40
   8   7  -2    5.50    1.88
  -7  -8  -2    9.50    3.37
  -7  -8  -3   59.75    6.72
  -8  -7   3   70.96    7.71
   8   7   3   63.03    5.12
  -7   8   3   67.60    5.11
   8   7  -3   66.19    5.68
   8   7   3   68.24    4.65
   7   8  -3   67.37    6.09
  -7  -8   3   67.74    7.52
  -8  -7  -3   70.33    7.21
   7   8   3   59.31    5.29
  -7   8   4    9.25    2.13
  -8  -7  -4   13.04    3.44
  -8  -7   4   10.41    3.65
   7   8   4    9.33    1.88
  -7  -8   4    8.86    2.98
   7   8   4    9.60    2.44
   8   7   4   10.08    2.04
   8   7   4    7.92    2.03
   8   7  -4    7.21    2.08
  -7  -8  -4    7.05    3.04
   7   8  -4    9.12    2.60
  -7   8  -5  208.58   12.26
  -7  -8   5  215.52   13.33
   8   7   5  215.41    9.24
   7   8   5  208.11    8.90
   8   7  -5  188.70    9.83
  -7   8   5  209.51    9.94
  -8  -7   5  206.08   12.77
  -7  -8  -5  200.03   12.40
  -8  -7  -5  184.89   12.05
   8   7   5  181.51    8.78
   7   8   5  196.10    9.91
   7   8   6   16.58    3.06
  -7  -8  -6   17.10    4.08
  -8  -7   6   17.63    4.03
  -8  -7  -6   19.43    4.30
  -7   8   6   16.43    2.95
  -8   7  -6   15.12    3.63
  -7  -8   6   17.96    4.50
   8   7  -6   16.36    3.16
  -7   8  -6   17.33    4.14
   8   7   6   17.47    2.76
   7   8   6   14.80    2.51
   8   7   6   16.47    2.79
  -7   8   7  357.14    7.36
  -8   7  -7  347.38    6.99
   7   8  -7  330.69    7.10
   8   7  -7  339.84    7.12
   8   7  -7  321.47   14.14
  -8   7   7  345.71    7.64
  -8   7  -7  342.92   16.15
  -7   8  -7  330.79   15.90
   7   8   7  349.84   12.74
  -7   8  -7  347.31    7.00
   7   8  -7  334.17   13.80
  -7  -8   7  342.19   17.52
  -8  -7   7  323.11   16.77
   8   7   7  338.88   12.82
  -8  -7  -7  344.43   16.49
  -8  -7   7  364.60    9.58
  -7   8   7  343.15   13.81
  -7  -8   7  349.37    9.30
  -7   8   7  344.01    8.24
  -8   7   7  331.04    8.28
   7   8   7  319.32   13.16
  -7  -8  -7  329.96   16.20
  -8   7  -8    3.95    2.54
  -8   7  -8    3.84    0.94
   7   8   8    4.48    1.89
  -7  -8   8    5.59    1.93
  -8  -7   8    3.75    2.68
   7   8   8    4.70    1.86
  -7  -8  -8    5.44    2.75
  -8   7   8    2.27    2.37
  -7   8   8    1.24    1.31
   7   8  -8    3.80    0.96
   7   8   8    5.63    1.19
   7   8  -8    4.17    1.02
  -8   7   8    6.43    1.63
   8   7   8    5.62    2.00
   8   7  -8    5.00    1.07
  -8  -7  -8    4.11    2.65
  -8   7  -8    4.42    0.86
  -7   8  -8    5.15    1.00
  -7  -8   8    4.87    2.86
  -7   8  -8    5.55    2.74
  -7   8  -8    3.27    0.89
   7   8  -8    5.21    2.11
   8   7  -8    5.40    2.21
  -7   8   8    4.38    1.97
  -7   8   8    4.91    1.87
  -8  -7   8    4.45    1.82
   8   7  -8    6.04    1.15
  -8   7  -9  270.57    6.05
  -7  -8   9  259.93    8.04
  -7  -8   9  256.32   15.61
  -7   8   9  269.40   13.36
   7   8   9  250.42   12.12
   7   8   9  266.32    6.73
   7   8   9  284.52   12.34
   7   8  -9  252.48    6.18
  -7   8   9  255.04    7.33
   8   7  -9  243.30    6.01
  -7   8  -9  266.00    6.07
  -8   7  -9  260.31   14.75
  -7   8  -9  267.31   14.65
  -7   8   9  271.50    6.71
  -8   7   9  275.83    7.05
   7   8  -9  254.18   13.28
   8   7  -9  251.71   13.36
  -8  -7   9  259.51    8.04
  -8  -7   9  260.86   15.24
  -7   8  -9  254.87    6.05
  -7  -8  -9  268.86   15.28
  -8  -7  -9  263.10   14.99
   8   7   9  272.12   12.30
  -8   7   9  242.16    7.43
   8   7  -9  266.34    6.52
   7   8  -9  260.86    6.50
  -8   7  -9  249.59    5.97
  -7  -8 -10   13.39    4.40
   7   8  10   12.10    1.54
   7   8 -10   10.01    1.49
  -7   8 -10    9.78    1.36
   8   7  10   12.20    1.59
  -7   8  10   28.16    4.58
   7   8  10   11.15    2.82
   7   8 -10   11.10    1.39
   8   7  10   14.07    3.02
   8   7 -10   13.36    1.46
  -7  -8  10   13.37    4.08
  -7   8 -10   12.50    1.43
  -8  -7  10    9.96    3.39
  -7   8 -10   17.07    5.39
  -8   7 -10   10.90    1.27
  -8   7 -10    9.72    3.40
   7   8 -10   11.33    3.30
   8   7 -10   11.42    3.22
   7   8  10   11.61    2.59
  -8   7  10   14.28    2.99
  -8  -7 -10   11.05    3.95
  -8  -7  10   13.40    2.40
  -7   8  10   11.30    2.25
  -7  -8  10   11.83    2.15
   7   8  11  451.35    9.39
  -7   8  11  463.60    9.59
   7   8 -11  447.02    9.21
   8   7  11  455.91    9.44
   8   7  11  461.36   17.26
   7   8 -11  457.90   19.40
  -7   8 -11  446.75    8.28
  -7  -8 -11  463.07   20.82
  -7   8 -11  466.45   20.20
  -8   7 -11  442.05    8.11
   8   7 -11  416.58   18.69
   7   8  11  467.85   17.12
  -8  -7  11  419.23   19.66
  -7  -8  11  419.43   20.36
   8   7 -11  455.60    9.09
  -8  -7 -11  467.62   20.66
  -7   8 -11  419.94    8.09
  -8   7 -11  451.99   20.27
  -7  -8  11  451.28   10.70
  -8  -7  11  442.05   10.58
  -8   7  11  454.02    9.68
   7   8  12    3.15    1.12
  -8   7  12   -0.99    3.22
   8   7  12   -0.58    1.62
  -8  -7 -12    0.32    1.94
  -8   7 -12    1.66    0.67
  -7   8 -12    1.24    0.70
  -7   8  12    1.07    2.29
   7   8  12    1.15    1.33
  -7   8 -12    1.53    1.91
   8   7  12    2.24    1.00
   7  -8  12    1.51    0.73
   7   8 -12    0.29    1.86
   8   7 -12    1.89    1.99
  -7  -8 -12    2.64    2.60
   7   8 -12    2.24    1.03
  -7  -8  12    6.00    2.09
  -8  -7  12    1.13    1.61
   8   7 -12    2.44    1.09
  -8   7 -12    1.04    1.97
   8   7 -13  212.68    6.40
  -7   8 -13  205.94   14.03
   7   8  13  221.80    6.43
   7   8 -13  216.56    6.39
  -8   7  13  270.41    8.28
  -8  -7  13  207.68    6.79
   7  -8  13  208.25    6.10
   8   7  13  212.79    6.44
  -7  -8  13  217.39    6.95
  -8   7 -13  193.31   13.76
   7   8 -13  182.83   12.85
   8   7 -13  211.96   14.02
   7   8  13  227.96   12.37
  -8  -7 -13  211.44   14.49
  -7   8  13  242.06    7.64
  -7  -8 -13  211.49   14.54
   8   7  13  220.03   12.24
   8   7  14    1.77    0.99
   7   8  14   -0.70    1.73
  -8  -7 -14    2.14    2.23
   8   7  14    1.27    1.20
  -7   8 -14    2.12    2.52
   7   8  14    1.77    1.08
  -7  -8  14    1.49    0.83
   7  -8  14    1.80    0.86
  -8   7 -14   -0.68    1.82
  -8  -7  14    3.20    1.48
  -8   7  14   -1.84    3.93
   7   8 -14   -1.18    1.78
   8   7 -14    2.37    2.07
   8   7 -14    1.25    1.03
  -7  -8  14    2.50    1.41
  -7  -8 -14    2.86    3.06
   7   8 -14    1.58    1.02
  -7   8  14    0.97    3.05
   8   7  15   78.79    3.81
  -8  -7  15   63.88    3.69
  -8   7  15   61.76    5.02
   7   8 -15   73.97    3.70
  -7  -8  15   71.88    3.53
   7  -8  15   72.21    3.52
  -7  -8  15   68.83    3.85
   7   8  15   79.35    3.90
  -7   8  15   85.14    5.35
   8   7 -15   73.10    3.73
   7   8 -16    1.35    1.19
  -7  -8  16   -0.11    0.70
   7  -8  16    0.45    0.63
  -7  -8  16   -1.38    1.43
   8   7  16    0.02    1.04
  -7   8  16    1.36    3.63
   7   8  16   -0.33    1.15
   8   7 -16   -1.84    1.17
   8   7  17   44.48    2.80
   7   8 -17   44.60    2.91
   7   8  17   45.53    2.82
   8   7 -17   45.44    2.90
  -7  -8  17   34.99    2.65
  -7  -8  17   40.89    2.62
   7  -8  17   39.96    2.52
  -7   8  17   50.09    5.10
  -7  -8  18    1.66    0.79
   7   8  18    1.21    0.97
   7   8 -18    3.24    1.08
   8   7  18    1.00    0.93
   8   7 -18    1.85    1.06
   7  -8  18    1.46    0.82
  -7   8  18    4.31    4.08
   8   7  19    2.63    0.91
   7   8  19    3.31    1.07
   8   7 -19    3.66    1.08
   7   8 -19    1.82    0.87
   7  -8  19    3.55    0.92
  -7  -8  19    2.84    0.76
   8   7  20   10.78    1.34
   7  -8  20    8.91    1.14
  -7  -8  20    9.33    1.13
   7   8  20   11.70    1.38
   8   7 -20   10.24    1.23
   7   8 -20   11.34    1.30
   8   7  21    0.24    0.61
   7   8  21   -0.79    0.68
  -7  -8  21   -0.40    0.52
   7  -8  21    1.21    0.63
   8   7  22    0.46    0.54
   7   8  22   -0.93    0.68
   7  -8  22    0.20    0.45
   8   7  23   15.13    0.97
   7   8  23   18.23    1.14
  -8  -8   0   35.24    5.93
   8   8   0   28.59    3.90
   8   8  -1    0.13    1.10
   8   8   1   -0.08    1.00
  -8  -8   1    2.82    2.41
  -8  -8  -1   -0.93    2.21
   8   8   2   29.85    3.82
   8   8  -2   28.35    4.00
  -8  -8   2   35.66    5.89
  -8  -8  -2   26.92    5.10
   8   8   3    0.61    1.21
  -8  -8   3    0.26    2.14
  -8  -8  -3    0.63    2.07
   8   8  -3   -0.12    1.26
   8   8  -4   47.24    2.58
  -8   8  -4   52.13    2.58
   8   8  -4   44.05    5.07
  -8  -8   4   48.72    6.74
  -8  -8  -4   56.32    7.01
  -8  -8   4   44.63    3.60
  -8   8  -4   54.92    2.83
  -8   8   4   51.06    3.14
   8   8   4   45.43    4.78
  -8  -8  -5    2.17    2.13
   8   8   5    1.54    1.14
   8   8   5    1.35    1.29
  -8   8  -5    0.27    0.78
   8   8  -5   -0.15    0.79
  -8  -8   5    0.99    2.03
   8   8  -5   -0.42    1.27
  -8   8  -5    0.71    0.80
  -8  -8   5    0.09    1.74
   8   8  -5   -0.08    0.71
  -8   8   5   -1.14    1.30
   8   8  -6   55.95    2.80
  -8  -8   6   62.32    4.06
  -8   8   6   66.61    3.57
   8   8  -6   57.44    2.82
  -8   8  -6   58.17    2.78
  -8   8  -6   59.07    2.92
  -8  -8   6   55.37    7.38
  -8  -8  -6   57.13    7.08
  -8   8   6   61.68    3.50
   8   8   6   54.84    4.85
   8   8   6   52.30    5.20
  -8  -8  -7    1.26    2.51
  -8   8   7    0.40    1.42
  -8   8  -7    1.76    1.11
  -8   8  -7    1.68    0.95
   8   8   7    0.90    0.72
  -8  -8   7    2.92    1.91
  -8   8   7    3.95    2.37
   8   8  -7    2.02    1.08
   8   8   7   -0.10    0.96
  -8   8  -7    2.92    2.30
  -8  -8   7    3.63    2.44
  -8   8   8  194.22    6.42
   8   8  -8  180.29    5.33
   8   8  -8  178.70    5.24
  -8   8  -8  182.58   12.47
  -8   8  -8  187.51    5.08
  -8  -8  -8  183.91   12.58
  -8  -8   8  173.56   13.02
  -8  -8   8  186.39    7.01
  -8   8   8  197.18    6.02
   8   8   8  187.68    9.80
  -8   8  -8  180.19    5.18
  -8   8  -9    0.60    0.87
  -8  -8   9   -0.70    1.71
   8   8  -9    1.68    1.09
  -8   8   9   -1.35    1.74
  -8   8   9    2.42    2.79
   8   8   9    0.45    1.01
   8   8  -9    2.12    1.03
   8   8   9    0.07    1.04
  -8  -8   9    2.32    2.64
  -8   8  -9   -0.55    1.81
  -8  -8  -9   -0.15    2.74
  -8   8  -9    1.25    0.91
  -8  -8  10    1.87    2.29
   8   8 -10    2.64    1.01
   8   8  10    2.77    1.03
   8   8 -10    2.50    0.90
  -8   8 -10    1.76    0.95
   8   8  10    1.88    1.37
   8   8 -10    2.43    2.24
  -8  -8 -10    2.84    2.64
  -8  -8  10   -0.55    1.86
  -8   8 -10    2.06    0.87
  -8   8  10    0.29    2.69
  -8   8 -11    0.56    0.95
   8   8  11    1.21    1.53
   8   8 -11    1.93    1.24
   8   8  11    1.39    1.15
  -8  -8  11    1.22    2.78
  -8   8 -11    1.28    0.86
  -8  -8 -11    3.15    3.22
   8   8 -11    0.55    1.46
  -8  -8  11    0.66    2.43
  -8   8  11   -4.59    3.22
  -8  -8 -12    5.13    2.63
   8   8  12    5.44    1.29
  -8   8 -12    4.17    0.94
  -8   8 -12    4.16    2.73
   8   8 -12    1.76    2.14
   8   8  12    5.77    1.98
  -8  -8  12    6.03    1.96
   8   8 -12    6.04    1.37
   8   8  13    1.74    1.89
   8   8  13    0.61    1.12
  -8   8 -13   -0.13    0.66
  -8   8 -13    0.87    1.98
   8   8 -13   -2.46    2.21
  -8   8  13    1.33    3.76
  -8  -8 -13    2.27    2.81
   8   8 -13   -0.86    1.08
  -8  -8  13    2.10    1.58
   8   8  14   58.11    3.29
  -8  -8  14   55.57    3.49
  -8   8  14   58.34    5.04
   8   8 -14   55.32    3.20
   8   8 -15    1.46    1.34
   8   8  15    0.20    1.06
  -8  -8  15   -1.02    1.17
   8   8 -16   55.69    3.25
   8   8  16   54.49    3.13
  -8  -8  16   44.03    2.99
  -8   8  16   58.64    5.29
   8   8 -17   -0.33    1.01
   8   8  17    0.43    1.06
   8   8 -18   43.22    2.66
   8   8  18   42.36    2.63
   8   8 -19   -0.15    0.80
   8   8  19    0.32    0.78
   8   8  20   75.11    3.07
   8   8 -20   75.67    3.03
   8   8  21    0.06    0.60
   8   8  22   49.38    2.00
   8   8  23    0.61    0.38
   0  -9   0    1.65    1.92
   0   9   0    3.76    2.24
  -9   0   0    1.20    1.54
  -9   0  -1    1.81    1.53
  -9   0   1    1.10    1.07
   0   9   1    3.21    1.84
   0   9  -1    2.84    1.80
   0   9  -1    1.28    0.96
   0  -9  -1    1.42    1.63
   0  -9   1    1.17    1.55
   0  -9   2    0.44    1.97
  -9   0  -2    0.92    1.74
   0   9   2    1.14    1.64
  -9   0   2    0.23    1.04
   0   9  -2    0.44    0.90
   0  -9  -2    0.68    1.86
   0   9  -2    1.53    1.86
   0   9   3   24.13    3.76
   0  -9   3   22.40    3.78
   0   9  -3   18.38    2.54
   0   9   3   21.18    2.65
   0   9  -3   20.89    3.44
   0  -9  -3   21.74    3.42
  -9   0  -3   20.56    2.98
   0   9  -4    0.13    1.05
   0   9   4   -0.12    1.01
   0  -9  -4    0.92    1.40
   0   9   4    0.00    1.69
   0  -9   4    0.36    1.81
  -9   0  -4    0.29    1.32
   0   9  -4    0.43    1.77
   0   9  -5   21.30    3.08
   0   9   5   17.55    2.66
   0  -9   5   22.80    4.12
   0  -9  -5   20.00    3.47
   0   9   5   17.95    3.59
   0   9   6    0.62    1.16
   0   9  -6   -0.46    1.35
   0  -9  -6   -0.49    1.32
   0  -9   6    0.11    1.70
   0   9   6   -0.21    1.45
   0   9   7  245.58   12.24
   0   9  -7  246.44   11.26
   0  -9   7  267.74   13.47
   0   9   7  251.62   10.24
   0  -9  -7  252.86   11.47
   0   9   8    0.00    1.11
   0   9   8   -0.16    1.54
   0  -9  -8    1.19    1.75
   0   9  -8    0.59    1.52
   0   9  -9  375.52   15.37
   0   9   9  389.24   16.24
   0   9   9  381.07   13.63
   0  -9  -9  387.25   14.66
   0   9  10   -0.10    0.81
   0   9  10   -0.65    1.40
   0   9 -10   -0.70    1.63
   0   9  10   -0.27    1.78
   0  -9  10   -0.27    1.05
   0   9  11  340.82    7.27
   0   9  11  350.94   16.38
  -9   0 -11  330.02   15.08
   0   9 -11  332.90   15.56
   0   9  11  344.75   13.72
   0  -9  11  340.05    8.45
   0   9 -11  321.76    7.17
   0   9  12    0.11    0.80
   0   9 -12   -1.21    1.07
   0   9  12    0.56    1.96
   0   9 -12   -0.23    2.03
   0  -9  12   -3.17    1.40
   0   9  12   -0.61    1.36
  -9   0 -12   -0.28    1.60
   0   9 -13  287.01    6.93
   9   0  13  303.17   15.04
   0   9  13  299.88    7.16
   0  -9  13  297.77    7.97
  -9   0 -13  343.06   16.24
   0   9 -13  300.16   15.89
   0   9  13  305.35   16.21
   0   9  13  289.57   13.52
   0   9  14    0.21    0.95
   0   9  14   -0.27    1.61
   0   9 -14    0.37    0.82
   9   0  14    0.28    1.40
   0   9 -14   -0.46    2.46
   0  -9  14   -1.31    1.51
   0   9  14    1.89    2.38
   9   0  15  214.64   12.87
   0   9  15  219.39    6.26
   0   9 -15  191.07   13.56
   0  -9  15  211.82    6.89
   9   0 -15  218.99   16.97
   0   9  15  216.43   14.43
   0   9 -15  200.51    5.72
   0   9  15  199.46   11.57
   0   9  16    0.84    1.10
   9   0  16   -0.11    1.32
   0  -9  16    1.26    1.14
   0   9 -16    1.66    2.68
   9   0 -16   -2.45    4.15
   0   9 -16    0.43    0.80
   0   9  16    0.84    2.15
   0  -9  16   -0.29    1.42
   0   9 -17  117.75    4.15
   0  -9  17  137.41    5.76
   0  -9  17  125.34    5.24
   0   9  17  134.99    4.92
   0   9  18   -0.34    1.02
   0  -9  18    0.42    0.99
   0   9  19    3.88    1.21
   0  -9  19    3.71    1.30
   0  -9  20    0.84    0.98
   0   9  20    0.15    0.99
   0   9  21   -0.26    0.95
   0  -9  21    0.07    0.89
   0  -9  22   -0.75    0.86
   0   9  22   -0.01    1.10
   0  -9  23   19.33    1.75
   0   9  23   18.11    1.71
   0  -9  24    0.51    0.68
   0   9  24    1.86    1.77
   0  -9  25   12.88    1.14
   1   9   0  367.43   13.54
   1  -9   0  338.24   12.67
  -1  -9   0  346.03   14.31
  -1   9   0  353.53   13.13
  -9  -1   0  350.96   11.74
  -9   1   0  332.83    9.79
  -1   9  -1    5.99    1.33
  -1   9  -1    6.83    2.38
   1  -9   1    5.54    1.89
   1   9  -1    7.79    2.96
  -9  -1  -1    5.15    1.95
  -1  -9   1    7.53    2.70
   1  -9  -1    7.18    2.30
  -1  -9  -1    7.42    2.45
  -9   1  -1    7.00    1.73
  -9  -1   1    4.13    1.48
  -1   9   1    7.97    2.42
   1   9   1    8.19    2.53
   1  -9  -2  586.69   16.51
   1   9   2  584.60   17.83
  -1   9  -2  574.98   14.40
   1   9  -2  551.89   12.48
  -1   9   2  594.63   17.60
   1   9  -2  601.48   18.41
   1   9   2  585.80   13.17
  -1   9  -2  599.52   17.53
  -1  -9   2  631.86   19.30
  -1  -9  -2  588.40   18.31
  -9  -1   2  575.86   15.41
  -9  -1  -2  589.57   16.18
  -9   1  -2  590.24   14.65
   1  -9   2  578.17   17.58
  -1   9  -3   89.17    5.74
   1   9  -3   89.26    5.14
   1   9  -3   89.75    7.16
  -1   9  -3   92.78    6.85
   1   9   3   88.98    5.19
   1  -9   3   96.67    7.19
  -1  -9   3   94.45    7.69
   1  -9  -3   94.09    6.45
  -1  -9  -3   90.57    6.99
  -9  -1  -3   94.37    6.48
  -9   1  -3   88.19    5.63
  -1   9   3   94.04    6.88
  -9  -1   3   92.13    5.95
   1   9   3   89.76    6.80
  -1   9   4  324.67   12.98
  -1   9  -4  306.58   11.27
   1   9  -4  294.62   10.31
   1   9  -4  307.21   13.44
  -1   9  -4  316.13   13.03
  -1   9   4  312.34   10.36
   1   9   4  307.65   10.03
   1  -9   4  308.74   13.17
  -1  -9   4  302.86   14.05
  -9  -1   4  277.72   10.22
   1  -9  -4  305.90   11.72
  -9  -1  -4  288.72   11.50
   1   9   4  311.03   12.88
  -1  -9  -4  307.80   13.11
  -1   9  -5  363.35   13.00
   1   9  -5  371.79   12.37
  -1   9  -5  379.98   14.78
  -1   9   5  381.16   14.64
   1   9   5  378.35   14.63
  -1   9   5  373.69   11.85
   1  -9   5  390.24   15.14
  -1  -9   5  405.31   16.30
   1   9   5  357.20   11.52
   1  -9  -5  371.61   13.05
  -1  -9  -5  366.37   14.13
  -9  -1  -5  389.91   14.00
   1   9   6  124.19    8.53
   1  -9  -6  121.30    7.37
  -1   9   6  126.49    8.46
   1   9  -6  122.62    7.42
  -1   9  -6  109.81    7.42
  -1   9   6  117.37    6.76
   1  -9   6  114.91    8.58
  -1  -9   6  132.63    9.53
   1   9   6  118.84    6.80
  -1  -9  -6  121.29    8.12
   1  -9  -7   10.74    2.28
   1   9   7   10.93    2.25
  -1   9   7    9.83    2.12
  -1   9   7    9.24    2.77
   1   9   7    8.84    2.57
  -1   9  -7   11.99    2.80
   1   9  -7    9.99    2.53
  -1  -9   7   11.21    3.55
  -1  -9  -7   11.43    2.90
  -1   9   8   36.68    5.00
   1   9   8   34.10    4.98
  -1   9  -8   34.11    4.61
  -1  -9  -8   38.01    4.72
  -1   9   8   32.98    3.85
  -1  -9   8   39.47    5.68
   1   9   8   37.18    4.12
  -9   1  -8   31.85    4.81
   1   9  -8   33.21    4.36
  -1   9   9    7.30    2.26
  -9   1  -9    8.46    2.88
   1   9  -9    9.44    2.97
   1   9   9    6.85    2.06
  -1  -9  -9    8.39    2.66
  -1   9   9    6.01    2.24
  -1   9  -9    9.96    2.81
   1   9   9    8.25    2.69
  -1   9  10    1.68    1.38
   1   9 -10    2.02    0.84
   1   9  10    3.41    1.65
  -1   9  10    2.07    1.90
  -1  -9 -10    2.43    1.77
   1   9  10    3.18    2.13
  -9   1 -10    3.22    2.12
  -1   9 -10    3.44    2.25
   1   9 -10    0.95    1.58
   1   9  10    2.22    0.82
   1  -9  10    1.21    1.13
  -1  -9  10    1.34    1.10
  -1   9  10    2.53    0.85
  -1   9  11    1.87    2.00
  -1   9  11    0.45    1.25
  -1   9 -11    0.69    0.76
  -1   9  11    0.67    0.77
  -1  -9  11   -0.71    1.35
   1  -9  11    0.66    1.22
  -9   1 -11   -0.36    1.47
   1   9  11    0.01    1.69
  -1   9 -11    0.49    1.63
  -1  -9 -11   -0.60    1.68
   1   9 -11   -1.55    2.01
   1   9  11    0.72    1.45
   1   9 -11    1.16    0.95
   1   9  11   -0.11    0.81
   1  -9  12   40.05    3.70
   9   1  12   25.46    4.34
   1   9 -12   23.47    1.95
   1   9  12   29.72    4.98
  -9   1 -12   20.49    4.24
  -1  -9  12   24.14    2.37
  -1   9  12   26.38    4.69
  -1   9 -12   27.75    4.69
   1   9 -12   26.75    4.58
  -1   9  12   26.41    2.02
   1   9  12   26.58    2.05
  -1   9  12   28.88    4.14
   1   9  12   24.01    3.91
  -1   9 -12   25.04    2.00
  -1   9  13    8.16    1.45
  -1   9  13    8.52    2.60
   1   9 -13    8.05    1.43
   1  -9  13    7.27    1.97
  -1  -9  13    7.24    1.76
  -1   9 -13    1.11    0.90
   9   1  13    7.91    2.70
  -9   1 -13    7.04    2.73
   1   9  13    7.44    1.35
   1   9  13    5.34    2.66
  -1   9 -13   11.74    3.53
   1   9 -13    7.73    2.83
  -1   9  13    8.25    3.10
   1   9  13    8.90    2.76
   9   1  14  110.46    9.10
   1   9  14  109.76    4.26
   9  -1  14  104.40    8.99
   1   9 -14  103.84    4.08
  -1  -9  14  104.35    4.89
   1  -9  14  109.64    4.90
  -9   1 -14  102.94    9.25
  -1   9  14  109.86    8.26
  -1   9 -14   98.87    9.62
   1   9 -14   97.20    9.33
   9   1 -14  103.30   11.08
   1   9  14  108.46    9.86
  -1   9  14  106.18   10.05
   1   9  14  109.13    8.41
  -1   9 -14   99.75    3.88
  -1   9  14  106.52    4.28
   9   1  14   95.45    3.77
   1   9  15    1.33    1.46
  -1   9 -15    0.70    0.74
   1   9 -15    0.78    0.98
   9   1  15    1.02    0.78
  -1   9  15    1.72    1.22
   1   9  15   -0.25    0.97
   9   1  15    0.78    1.82
  -1   9  15    0.67    1.42
   1  -9  15   -7.24    2.53
   9  -1  15   -0.18    1.64
  -9   1 -15   -1.82    2.12
  -1   9 -15    0.78    1.91
   1   9 -15   -1.04    2.14
   9   1 -15    1.57    2.11
   9  -1 -15   -1.05    2.66
  -1  -9  15    0.11    1.67
   1   9  15    1.95    2.43
  -1   9  15    0.47    2.22
   1   9 -16  124.56    4.47
   9   1  16  128.75   10.09
  -1   9 -16  121.15    4.22
  -1  -9  16  128.08    5.41
   1  -9  16  128.27    5.39
  -1  -9  16  138.10    5.86
  -1   9 -16  131.04   11.39
   1   9 -16  115.81   10.91
   1   9  16  130.82    4.86
   9   1 -16  130.61   12.68
   9  -1 -16  129.35   13.08
  -1   9  16  125.65    9.16
   1   9  16  125.91    9.38
   9  -1  16  128.76   10.02
   1  -9  16  135.38    5.78
  -1   9  16  133.24    4.89
   1   9  17    1.65    1.17
   1   9 -17    1.33    0.82
   1  -9  17    1.04    1.50
  -1  -9  17    1.39    1.29
   1  -9  17    1.88    1.34
  -1  -9  17    0.07    1.72
   9   1 -17    1.00    0.82
  -1   9  17    1.13    1.10
   1  -9  18  115.49    4.86
  -1   9  18  118.99    4.59
   1  -9  18  118.45    5.18
   1   9  18  116.84    4.48
  -1  -9  18  107.76    4.67
  -1  -9  18  114.18    5.15
   1   9  19    2.36    1.07
  -1  -9  19    1.57    1.12
   1  -9  19    1.57    1.04
  -1   9  19    1.31    0.98
  -1  -9  19    0.15    1.43
  -1  -9  20  120.82    4.98
   1  -9  20  126.89    5.05
  -1   9  20  125.12    4.50
   1   9  20  121.26    4.37
  -1   9  21    0.57    1.12
   1   9  21    0.56    0.86
  -1  -9  21    0.41    0.94
   1  -9  21   -0.15    0.86
   1  -9  22   81.11    3.67
  -1  -9  22   79.18    3.61
   1   9  22   76.53    3.13
  -1   9  22   77.07    3.33
  -1  -9  23    2.20    0.93
   1  -9  23    1.84    0.86
   1   9  23    2.36    1.04
  -1   9  23    1.77    1.64
   1  -9  24   38.97    2.16
  -1   9  24   38.10    2.52
   1   9  24   44.35    2.38
  -1  -9  24   41.32    2.22
   1  -9  25    4.63    0.76
  -1  -9  25    4.60    0.77
   2  -9   0  266.59   10.72
   2   9   0  282.43   12.09
  -2  -9   0  295.46   13.52
  -9  -2   0  290.84   11.42
  -2   9   0  268.05   11.35
  -2   9  -1   18.15    2.72
   2   9   1   19.32    3.56
  -2  -9   1   22.45    4.07
   2   9   1   19.46    2.16
   2   9  -1   22.13    3.73
   2  -9   1   19.42    3.20
   2  -9  -1   21.28    3.18
  -2  -9  -1   25.75    4.21
  -9  -2  -1   22.41    3.43
  -9  -2   1   18.27    3.03
  -2   9   1   21.30    3.47
  -2   9  -1   20.57    3.50
   2   9   2    2.27    1.01
  -2   9  -2    2.35    1.78
  -2  -9  -2    0.79    1.83
  -2  -9   2    2.71    2.30
  -2   9   2    2.41    1.80
   2   9   2    1.07    1.70
   2  -9   2    1.57    1.58
  -9  -2   2    1.09    1.48
  -2   9  -2    1.22    1.21
   2  -9  -2    1.85    1.46
   2   9  -2    0.60    1.64
  -9   2  -2    1.67    1.25
  -9  -2  -2    0.17    1.54
  -2   9  -3   11.94    2.68
   2   9  -3   11.80    3.07
  -9   2  -3   10.79    2.16
   2   9   3   10.02    1.81
  -9  -2  -3   10.98    2.57
  -2  -9  -3   12.16    3.16
   2   9   3   11.29    2.92
   2  -9  -3    9.48    2.09
   2  -9   3    8.87    2.41
  -2   9  -3   11.88    2.40
  -2   9   3   11.55    2.63
  -9  -2   3   11.70    2.55
  -2  -9   3   10.81    3.27
   2   9   4   83.50    5.30
  -2   9   4   93.89    7.01
  -2   9  -4   91.18    6.43
   2   9  -4   81.79    5.27
   2   9  -4   95.12    7.48
  -2   9  -4   93.66    7.00
   2  -9   4   90.18    7.05
  -2  -9   4   87.85    7.84
  -9  -2   4   82.22    6.12
   2  -9  -4   83.17    5.59
  -2  -9  -4   90.87    7.54
  -9  -2  -4   92.09    6.90
   2   9   4   86.29    6.88
  -2  -9   5   95.21    8.21
  -2   9  -5   84.43    6.45
   2   9  -5   87.04    5.77
  -2   9  -5   86.89    6.93
   2  -9   5   82.62    6.76
  -9  -2   5   86.16    6.22
   2   9   5   89.02    5.62
  -2  -9  -5   89.55    7.33
  -9  -2  -5   86.28    6.77
  -2   9   5   88.82    6.86
   2   9   5   89.59    7.05
   2   9   6    3.42    1.30
  -9  -2   6    3.34    1.65
   2   9   6    3.10    2.07
  -2  -9   6    2.58    2.25
  -9  -2  -6    5.46    2.25
  -2   9  -6    3.57    1.95
   2   9  -6    5.10    1.70
  -2   9  -6    2.44    1.59
  -2   9   6    2.43    1.60
  -2  -9  -6    4.82    2.39
  -2   9   6    5.88    2.32
   2   9   7  218.99    9.64
   2   9   7  216.83   11.46
  -2   9  -7  208.98   10.82
   2   9  -7  217.89   10.38
  -2   9   7  218.00    9.71
  -2  -9   7  223.57   12.99
  -2  -9  -7  214.14   11.43
  -9  -2  -7  241.00   11.82
  -2   9   7  232.95   11.62
   2   9   8   -0.23    0.99
  -2  -9   8    0.83    2.16
  -2   9   8    0.55    1.68
   2   9   8   -1.55    1.86
  -2  -9  -8   -0.35    1.63
  -2   9  -8   -0.36    1.38
   2   9  -8   -1.03    1.43
  -2   9   8   -0.46    1.26
  -9   2  -8    0.76    1.49
   2   9   9  138.40    8.43
   2   9   9  136.36    9.51
  -2   9   9  145.97    9.96
  -9   2  -9  131.03    9.72
  -2   9  -9  137.04    9.56
   2   9  -9  139.86    9.20
  -2   9   9  138.66    8.24
  -2  -9   9  134.97   10.48
  -2  -9  -9  149.28    9.93
   2   9  10    4.50    1.70
   2   9  10    3.81    0.91
   2   9 -10    5.71    1.14
  -2   9 -10    4.35    2.06
   2   9 -10    6.29    2.42
  -2   9  10    3.45    1.82
  -2   9  10    4.55    0.91
  -9   2 -10    3.99    2.19
  -2   9 -10    3.34    0.86
   2   9  10    3.55    2.05
   2  -9  10    5.23    1.39
  -2  -9 -10    3.57    2.14
  -2  -9  10    5.42    1.44
  -2   9  10    5.88    2.60
   2   9 -11  304.29    7.20
  -2   9 -11  301.41    6.80
  -2   9 -11  310.38   15.38
   2   9  11  319.54   13.65
  -9  -2  11  286.57    6.79
   2  -9  11  327.33    8.24
   9   2  11  349.04   15.16
  -2   9  11  318.64    6.98
   2   9  11  336.24   15.85
  -2   9  11  336.72   15.97
  -9   2 -11  313.79   15.57
   2   9 -11  316.02   15.10
  -2   9  11  323.89   13.40
  -2  -9  11  326.11    8.22
  -2  -9 -11  329.50   15.38
   2   9  11  313.09    7.09
   2  -9  12    3.48    1.62
  -2   9  12    4.53    1.89
   2   9  12    9.32    2.90
  -2  -9 -12    6.54    2.74
   2   9  12    7.75    1.31
   9   2  12    7.54    2.44
  -2   9  12    5.29    1.09
  -9   2 -12    5.05    2.46
  -2   9 -12    5.58    2.45
   2   9 -12    7.46    2.80
  -2   9  12    4.98    2.55
   2   9 -12    5.24    1.20
   2   9  12    5.41    1.85
  -2   9 -12    5.33    1.03
   2   9 -13  366.03    8.24
   9   2  13  397.99   16.98
  -2   9  13  385.25    8.28
  -2  -9  13  377.13    9.29
  -9   2 -13  377.69   17.85
  -2   9 -13  374.25   17.97
   2   9 -13  370.44   17.74
   2   9  13  398.11   18.34
  -2   9  13  403.90   18.98
  -2   9 -13  358.27    7.68
  -2   9  13  370.97   15.30
   2   9  13  402.39   16.13
  -2  -9 -13  404.48   18.13
   2  -9  13  398.68    9.30
   2   9  13  388.38    8.35
  -2   9  14    4.85    2.12
   2   9 -14    4.17    1.13
  -2   9 -14    4.04    0.99
  -2   9  14    4.53    1.15
   2   9  14    5.71    2.74
   2   9  14    2.54    1.50
   9   2  14    3.86    1.00
   2  -9  14    5.08    1.90
   9   2  14    5.01    2.35
   9  -2  14    4.04    2.22
  -9   2 -14    3.33    2.43
  -2   9 -14    4.99    2.42
   2   9 -14    5.39    2.53
   9   2 -14    9.43    3.95
   2   9  14    4.73    1.25
  -2  -9  14    3.00    1.58
  -2   9  14    2.39    2.32
   9   2  15  160.54   11.21
   9   2  15  146.90    4.82
  -9   2 -15  146.01   11.51
  -2  -9  15  154.89    6.19
   2  -9  15  161.19    6.20
  -2   9 -15  157.83   12.31
   2   9 -15  149.14   11.89
   9   2 -15  151.99   13.55
  -2   9  15  153.44   10.11
  -2   9 -15  145.85    4.63
   2   9  15  150.83   11.83
   2   9  15  153.65   10.33
  -2  -9  15  144.70    6.01
  -2   9  15  144.87   12.03
   9  -2  15  152.64   11.01
   2   9  15  157.13    5.35
   2   9 -15  154.26    5.15
  -2   9  15  163.22    5.32
   2  -9  15  165.75    6.18
  -2  -9  16   15.40    2.33
  -2   9  16   17.06    1.98
   2   9 -16   16.61    1.84
   9   2  16   15.28    1.56
   2   9  16   15.31    3.55
   2  -9  16   12.19    2.00
   2  -9  16   18.57    2.26
   9   2  16   15.37    3.71
  -2  -9  16   16.06    2.25
  -2   9  16   16.68    3.54
  -9   2 -16   10.28    3.58
  -2   9 -16   16.36    4.52
   2   9 -16   14.10    3.95
   9   2 -16   17.96    5.32
   9  -2 -16   13.39    4.57
   2   9  16   17.25    1.98
   9  -2  16   15.99    3.78
   9   2 -17   63.66    3.16
   9   2  17   58.60    2.84
  -2  -9  17   61.28    3.90
   2  -9  17   65.51    3.91
  -2  -9  17   60.24    3.73
   2  -9  17   58.18    3.71
   2   9  17   64.23    3.44
   2   9 -17   58.00    3.08
  -2   9  17   65.65    3.47
  -2  -9  18    1.22    1.47
   2   9 -18    0.76    0.80
   9   2 -18    1.71    0.81
  -2  -9  18   -0.16    1.08
   2  -9  18    1.05    1.06
   2   9  18    2.20    1.15
  -2   9  18    2.08    1.19
   2   9  19   10.68    1.53
  -2  -9  19   10.65    1.85
  -2  -9  19   10.57    1.71
   2  -9  19   11.37    1.80
  -2   9  19   10.51    1.68
  -2  -9  20    4.76    1.23
   2  -9  20    3.71    1.27
  -2   9  20    6.11    1.59
  -2  -9  20    4.05    1.32
   2   9  20    4.37    1.15
   2   9  21    0.87    0.83
  -2  -9  21    1.11    0.83
   2  -9  21    0.26    0.83
  -2   9  21    1.24    1.46
   2   9  22    0.65    0.90
  -2  -9  22    0.01    0.79
   2  -9  22   -0.33    0.73
  -2   9  22    0.46    1.74
  -2   9  23    3.63    2.12
   2  -9  23    5.24    1.03
   2   9  23    5.31    1.09
  -2  -9  23    7.54    1.14
  -2  -9  24    0.77    0.64
  -2   9  24    1.67    2.02
   2  -9  24    1.04    0.63
   2   9  24    1.84    1.01
  -2  -9  25   10.72    1.04
   2  -9  25   11.34    1.04
   3  -9   0  462.57   13.39
   3   9   0  495.16   16.53
  -3  -9   0  517.26   18.86
  -9  -3   0  491.04   15.96
  -3   9   0  502.61   15.38
   3   9   1   18.83    3.38
  -3  -9   1   20.11    4.24
  -3  -9  -1   18.98    3.86
   3   9  -1   18.63    3.36
   3   9   1   18.54    2.04
   3  -9   1   18.30    2.91
   3  -9  -1   16.75    2.54
  -9  -3   1   20.85    3.49
  -3   9  -1   19.25    3.27
  -9  -3  -1   20.37    3.41
  -3   9   1   18.91    3.20
   3   9  -2  322.10   13.30
   3   9   2  299.06    8.85
   3  -9   2  303.71   11.46
  -3   9  -2  305.46   11.87
  -3  -9   2  318.92   14.81
  -9  -3   2  307.32   12.74
  -3  -9  -2  307.17   14.09
  -9  -3  -2  326.32   13.04
   3   9   2  307.79   12.72
  -3   9   2  305.33   12.11
  -3   9  -2  299.66   11.54
  -3   9  -3    0.41    1.36
  -3  -9   3    0.95    1.98
   3   9   3    0.61    0.76
  -9  -3  -3   -0.06    1.62
   3   9   3    1.03    1.77
  -9  -3   3    1.27    1.86
   3   9  -3    0.85    1.64
  -3   9  -3    0.78    1.35
  -3   9   3    0.23    1.57
  -3  -9  -3    1.13    1.85
  -3   9  -4  361.13   13.59
  -3   9  -4  364.20   13.36
   3   9   4  379.37   14.52
  -3   9   4  385.44   14.17
  -3  -9   4  369.37   16.32
  -9  -3   4  353.43   13.81
   3   9   4  392.41   11.45
  -3  -9  -4  371.79   15.32
  -9  -3  -4  357.86   14.23
  -3   9  -5  101.58    7.33
   3   9  -5  104.43    6.24
  -3   9  -5  109.48    7.42
  -3  -9   5  109.85    9.21
  -9  -3   5  102.31    7.37
   3   9   5  111.94    6.33
  -3  -9  -5  103.00    8.08
  -9  -3  -5  107.33    7.90
   3   9   5  107.48    7.89
  -3   9   5  111.79    7.69
  -3   9   6  402.63   14.98
   3   9   6  400.60   15.37
  -3   9  -6  379.38   14.57
   3   9  -6  374.37   13.07
  -3   9  -6  373.48   14.16
  -9  -3   6  365.65   14.20
  -3  -9   6  399.42   17.58
  -3  -9  -6  386.05   15.62
   3   9   6  392.20   12.54
  -9  -3  -6  382.20   15.07
   3   9   7   24.70    4.03
  -3   9   7   23.67    3.81
  -9   3  -7   24.88    4.45
  -3   9  -7   26.81    4.17
   3   9  -7   26.16    3.61
  -3   9  -7   23.38    3.63
  -3  -9   7   25.61    4.90
  -9  -3   7   24.36    3.90
  -3  -9  -7   27.40    4.50
   3   9   7   26.44    3.40
  -9  -3  -7   27.38    4.25
   3   9   8   24.56    4.05
  -3  -9   8   27.54    5.03
  -3   9   8   26.71    4.28
  -9   3  -8   28.98    5.13
  -3   9  -8   24.35    4.11
   3   9  -8   25.88    4.02
  -9  -3   8   25.42    3.97
  -3  -9  -8   25.01    4.66
   3   9   8   24.14    3.44
  -9  -3  -8   24.13    4.19
   9   3   9   54.57    5.65
  -3   9   9   49.79    5.79
  -9   3  -9   44.53    6.12
   3   9   9   53.01    5.16
  -3   9  -9   50.23    6.05
   3  -9   9   53.54    3.18
   3   9  -9   46.08    5.27
  -3   9   9   49.84    4.98
  -3  -9   9   52.77    6.84
  -3  -9  -9   49.93    6.07
  -9  -3  -9   53.17    6.20
  -3  -9   9   51.82    3.32
   3   9   9   50.47    5.74
   3   9  -9   48.35    2.73
  -3   9  10    6.18    2.35
  -9  -3  10    4.54    1.11
  -3   9 -10    5.60    0.97
  -9   3 -10    4.26    2.29
   3   9  10    6.53    2.16
   3   9  10    7.31    1.18
  -3   9 -10    3.71    2.23
   3  -9  10   13.98    2.31
  -9  -3 -10    5.38    2.31
   3   9 -10    6.46    1.30
  -3   9  10    7.46    1.18
   9   3  10    4.76    2.01
   3   9  10    7.20    2.76
  -3  -9  10    8.90    3.26
   3   9 -10    4.62    2.21
  -3  -9 -10    6.19    2.69
  -3  -9  10    6.43    1.50
  -3   9  10    5.77    2.20
  -3   9  11    0.71    0.80
  -3   9  11    2.73    1.82
   3   9 -11    2.49    1.22
   3  -9  11    1.90    1.32
  -9  -3  11   -0.47    0.80
  -3   9  11    1.70    1.71
  -3   9 -11    1.55    0.92
   9   3  11    2.30    2.08
   3   9  11    0.93    0.80
  -3  -9 -11    3.31    2.71
  -9   3 -11    1.50    1.77
  -3   9 -11    0.90    1.68
   3   9 -11    0.20    1.91
   9  -3  11    1.50    0.75
   3   9  11    1.28    1.56
  -9  -3 -11    1.39    2.28
  -3  -9  11    0.31    1.35
  -3   9  11   -0.94    1.29
   3   9  11    1.74    1.55
   3   9  12   19.70    4.05
   9   3  12   20.20    3.88
  -3   9 -12   20.23    1.81
   3   9 -12   19.02    1.94
   3   9  12   20.69    1.89
  -9   3 -12   20.01    5.15
  -3   9 -12   19.25    4.28
   3   9 -12   17.30    3.81
  -3   9  12   20.79    3.52
  -3  -9 -12   19.41    4.09
   3   9  12   21.26    3.72
   3  -9  12   19.41    2.34
  -3   9  12   19.53    1.77
  -3   9  12   22.60    4.59
   3   9  13   39.33    2.72
   9   3  13   35.05    2.48
  -3   9 -13   38.06    2.38
   3  -9  13   39.50    3.22
  -9   3 -13   37.34    6.07
  -3   9 -13   45.15    6.45
   3   9 -13   38.08    5.92
   3   9  13   40.82    5.86
   9   3 -13   41.10    6.91
  -3   9  13   43.21    2.76
  -3   9  13   43.04    5.22
  -3   9  13   38.33    5.89
   3   9  13   43.47    5.45
  -3  -9 -13   41.98    6.32
  -3  -9  13   40.95    3.15
   3   9 -13   40.49    2.81
   9   3  13   41.75    5.60
   9   3  14   54.12    2.99
   3   9  14   60.01    3.25
   3  -9  14   57.06    3.64
   9   3  14   58.57    6.71
  -3  -9  14   55.93    3.61
  -9   3 -14   53.06    6.90
  -3   9 -14   52.94    7.14
   3   9 -14   58.27    7.23
   9   3 -14   64.25    8.55
   3   9  14   58.43    7.17
  -3   9  14   50.66    5.75
  -3   9  14   57.09    7.65
   3   9  14   62.51    6.48
  -3  -9 -14   61.67    7.55
   3   9 -14   54.44    3.14
  -3   9  14   59.43    3.18
  -3   9 -14   53.29    2.71
  -3   9 -15   43.13    2.46
   3   9 -15   44.19    2.87
   3  -9  15   45.21    3.40
   3  -9  15   45.76    3.31
  -3  -9  15   40.32    3.39
  -3   9  15   50.86    3.02
  -3  -9  15   47.81    3.42
  -9   3 -15   41.91    6.57
  -3   9 -15   38.86    6.13
   3   9 -15   43.11    6.65
   9   3 -15   45.57    7.28
  -3   9  15   45.54    5.56
   3   9  15   47.35    5.86
  -9  -3 -15   57.31    7.59
   9   3  15   42.98    2.67
   9  -3  15   45.92    6.22
   3   9  15   46.74    3.01
   9   3  15   46.43    6.04
   3   9 -16  199.61    5.97
   9   3 -16  219.53    6.07
   3  -9  16  212.29    7.05
   3   9  16  211.59    6.30
  -3  -9  16  203.25    7.04
  -3   9  16  212.74    6.15
   9   3  16  198.66    5.65
  -3  -9  16  204.28    6.80
  -3   9  17    5.24    1.31
   3   9 -17    4.88    1.26
   9   3  17    4.13    1.04
  -3  -9  17    5.51    1.69
  -3  -9  17    3.75    1.20
   3  -9  17    5.31    1.45
   9   3 -17    5.86    1.22
   3   9  17    5.28    1.24
   3   9  18  275.32    7.06
  -3  -9  18  259.45    7.41
   9   3 -18  278.87    6.71
  -3  -9  18  269.07    7.84
   3  -9  18  287.47    7.85
   3   9 -18  270.21    6.68
   9   3  18  256.14    6.20
  -3   9  18  286.16    7.16
   9   3  19    5.35    1.00
   3   9  19    4.47    1.17
   3   9 -19    5.25    1.11
  -3  -9  19    5.96    1.41
   3  -9  19    6.14    1.41
  -3  -9  19    3.09    1.37
   9   3 -19    5.30    1.08
  -3  -9  20  130.37    5.03
   3   9  20  135.82    4.62
  -3  -9  20  119.39    4.37
   3  -9  20  136.95    5.05
  -3   9  20  136.75    4.74
   3  -9  21    0.54    0.84
  -3  -9  21   -0.24    0.83
  -3   9  21   -1.45    2.08
   3   9  21    0.62    0.79
   3  -9  22   91.30    3.67
  -3  -9  22   92.64    3.72
  -3   9  22   84.57    3.84
   3   9  22   85.93    3.24
  -3   9  23    2.57    2.37
   3  -9  23    0.84    0.63
  -3  -9  23   -0.05    0.64
   3   9  23    0.99    0.78
   3   9  24   36.16    1.72
  -3  -9  24   38.19    2.00
   3  -9  24   41.18    2.05
  -3  -9  25    8.09    0.84
   3  -9  25    7.45    0.81
  -4  -9   0   15.07    3.99
   4   9   0   16.32    3.32
  -9  -4   0   14.47    3.42
  -4   9   0   16.15    3.03
  -9  -4  -1   14.78    3.37
  -4  -9  -1   13.89    3.72
  -4   9   1   15.93    3.02
   4   9   1   15.64    3.32
  -4   9  -1   12.75    2.70
  -4  -9   1   15.86    4.11
   4   9  -1   15.04    3.27
  -9  -4   1   13.79    3.20
  -4  -9   2   34.15    5.32
  -4   9  -2   29.71    4.15
   4   9  -2   29.80    4.39
   4   9   2   32.30    2.81
  -9  -4   2   38.57    4.96
  -4  -9  -2   36.30    5.23
  -9  -4  -2   34.90    4.62
  -4   9  -2   34.19    3.94
   4   9   2   31.77    4.23
  -4   9   2   32.49    3.98
   4   9   3    2.16    1.64
   4   9   3    3.14    1.23
  -9  -4   3   -0.09    1.54
  -4   9   3    0.44    1.21
  -4  -9   3    3.51    2.29
   4   9  -3    2.66    1.77
  -4   9  -3    2.60    1.77
  -4  -9  -3   -0.44    1.76
  -4   9  -3    1.64    1.29
  -9  -4  -3    1.38    2.01
  -4   9   4   22.86    3.62
  -4  -9   4   22.84    4.65
  -4   9  -4   25.61    4.00
   4   9  -4   25.88    4.20
  -4   9  -4   20.87    3.18
  -9  -4   4   22.59    3.94
   4   9   4   24.99    2.88
  -9  -4  -4   26.60    4.37
  -4  -9  -4   22.40    4.20
   4   9   4   23.15    3.73
   4   9   5   32.80    4.44
  -4   9   5   31.98    4.23
  -4  -9   5   34.98    5.58
  -4   9  -5   33.66    4.53
  -4   9  -5   35.34    4.12
  -9  -4   5   31.71    4.58
  -4  -9  -5   30.36    4.83
   4   9   5   34.14    3.55
  -9  -4  -5   35.83    4.88
  -4  -9   6   22.65    4.86
  -4   9   6   20.38    3.49
  -9  -4  -6   22.24    4.17
   4   9  -6   20.04    3.01
  -4   9  -6   18.53    3.60
  -4   9  -6   21.56    3.38
  -9  -4   6   20.09    3.70
   4   9   6   21.37    3.01
   4   9   6   20.48    3.80
  -4  -9  -6   22.60    4.19
   4   9   7  151.51    9.49
   9   4   7  165.78    9.17
  -4   9  -7  159.41   10.15
   4   9  -7  153.73    8.85
  -4   9  -7  149.83    8.80
  -9   4  -7  151.24   10.73
  -4  -9   7  166.57   11.91
  -9  -4   7  147.10    9.73
  -4  -9  -7  159.45   10.49
  -9  -4  -7  150.73   10.30
   4   9   7  157.27    8.35
  -4   9   7  158.16    9.55
   4   9   8    1.96    1.79
  -9  -4   8    0.93    1.50
   4   9   8    0.32    1.01
  -4   9  -8    0.51    1.23
   9   4   8   -1.46    1.60
  -9   4  -8    0.25    1.58
  -9  -4  -8   -0.60    1.97
   4   9  -8   -0.69    1.22
  -4   9   8    2.83    1.81
  -4  -9   8    2.15    2.00
  -4  -9  -8   -0.78    1.94
  -4   9  -8   -1.11    1.63
  -4   9  -9  238.90    5.71
  -4   9   9  234.83    5.81
   4   9   9  227.37    5.94
   4   9  -9  239.59   12.19
   4   9   9  235.40   12.44
   4   9  -9  231.19    6.05
   4   9   9  249.02   11.25
  -4   9   9  253.37   13.14
  -4   9  -9  239.76   13.06
  -4  -9   9  244.59    7.33
  -4   9  -9  234.54   11.65
   4  -9   9  240.28    6.72
  -9  -4   9  224.60   12.25
  -4  -9   9  248.26   14.72
  -9   4  -9  234.33   13.60
  -4  -9  -9  238.42   13.54
  -9  -4  -9  246.05   13.37
   9   4   9  255.99   12.07
  -9  -4   9  222.94    6.06
  -4   9  10    7.60    1.13
   4   9 -10    6.72    1.31
   4  -9  10    7.24    1.55
   4   9  10    5.90    1.02
   4   9  10    6.95    2.11
  -9  -4  10    7.27    1.19
  -4  -9 -10    7.73    2.83
   9   4  10    7.23    2.49
  -4  -9  10   10.62    3.63
   4   9  10    5.75    2.38
  -9   4 -10    7.49    3.06
  -4   9 -10    5.66    2.32
   4   9 -10    5.51    2.48
  -9  -4 -10    8.82    3.04
  -4  -9  10    8.03    1.80
  -4   9 -10    6.21    1.12
  -4   9  10    7.27    1.68
  -4   9  10    8.65    2.82
   9   4  11  223.23   12.05
   4  -9  11  211.78    6.65
   4   9 -11  206.42    6.04
  -4  -9  11  258.92    7.90
   4   9  11  207.37   12.29
  -9   4 -11  204.01   13.16
  -4   9  11  212.00    5.84
  -4   9 -11  198.28   12.60
   4   9 -11  203.15   12.35
   9   4 -11  188.06   13.67
  -4   9  11  224.79   13.28
  -4   9  11  182.85    6.18
  -4  -9 -11  219.12   13.44
   4   9  11  219.85   11.40
  -9  -4 -11  226.20   13.63
   4   9  11  208.58    5.89
  -4   9 -11  201.38    5.38
  -4   9  12    0.12    0.89
   4   9  12    0.94    1.64
   4   9  12    0.61    0.88
  -4  -9  12    1.75    1.45
   4  -9  12    1.56    1.47
  -4   9  12    1.73    1.78
  -4  -9 -12    1.83    2.13
  -9   4 -12   -0.62    2.86
  -4   9 -12   -0.36    2.29
   4   9 -12   -1.59    2.57
   9   4 -12   -0.35    2.33
   4   9 -12    0.12    1.23
   9   4  12   -0.03    1.41
  -4   9 -12   -0.33    0.89
  -9  -4 -12   -5.04    3.04
   4   9  12    0.74    1.43
  -4   9 -13  288.86    6.66
  -4  -9  13  316.43    8.55
   4  -9  13  323.49    8.40
   4   9 -13  300.22    7.60
   9   4  13  313.05    7.54
  -9   4 -13  293.82   16.38
  -4   9 -13  303.15   16.56
   4   9 -13  289.38   15.84
   4   9  13  311.56   16.02
   9   4 -13  313.39   18.24
   4   9  13  308.38    7.59
  -4   9  13  310.88   16.82
  -4  -9 -13  338.81   17.57
   4   9  13  316.18   14.67
  -9  -4 -13  321.65   17.56
  -4   9  13  324.24    7.54
   9   4  13  330.95   15.60
   4   9 -14    1.03    1.00
   4   9  14   -0.65    1.49
   9   4  14    1.34    0.86
   9   4  14   -0.01    1.58
  -4   9  14    2.46    2.26
   4   9  14    2.26    1.70
  -4  -9  14    2.96    1.95
  -9   4 -14   -0.79    1.97
  -4   9  14    1.71    1.21
  -4   9 -14    0.78    2.15
  -4  -9  14    2.00    1.08
   4   9 -14   -0.53    1.92
   9   4 -14   -0.54    2.01
  -4   9 -14    0.97    0.73
   4   9  14    0.40    0.96
   4  -9  14   -0.15    1.48
  -9  -4 -14    3.99    2.15
  -4  -9 -14    3.61    2.69
  -4  -9  15  162.13    6.14
   4  -9  15  163.67    6.04
   9  -4  15  144.90   10.38
   9   4 -15  168.86    5.32
   9   4  15  157.87    5.18
  -9   4 -15  146.56   11.87
  -4   9 -15  144.89   11.86
   4   9 -15  152.54   12.08
  -4   9  15  167.16    5.47
   9   4 -15  153.97   13.20
[truncated: 834,047 more chars]
